# Supplementary material for: Comprehensive Multi-omics Integration of Bulk, Single cell and Spatial Transcriptomics Reveals Temporal and Spatial Gene Expression to Cisplatin and 5-Fluorouracil in Colorectal Cancer
Source: Research Square preprint supplement (doi:10.21203/rs.3.rs-8003617/v1), 2025-11-04
Supplement: Supplementary file 2 [file 5541285f90d41073e47ba7fa.xlsx]

## Sheet: List of Supplementary Tables
Supplementary Tables	Title
Supplementary Table S1	Statistics of Colorectal Cancer Cell Line Transcriptome Mapping
Supplementary Table S2	Number of DEGs Between Different Doses for HCT116, HT29 and SW480 Cell Lines
Supplementary Table S3	DEGs in HCT116 Control vs HCT116 5-Fluorouracil
Supplementary Table S4	DEGs in HCT116 Control vs HCT116 Cisplatin 30M
Supplementary Table S5	DEGs in HCT116 Control vs HCT116 Cisplatin 300M
Supplementary Table S6	DEGs in HT29 Control vs HT29 Cisplatin 30M
Supplementary Table S7	DEGs in HT29 Control vs HT29 Cisplatin 300M
Supplementary Table S8	DEGs in SW480 Control vs SW480 5-Fluorouracil
Supplementary Table S9	DEGs in SW480 Control vs SW480 Cisplatin 30M
Supplementary Table S10	DEGs in SW480 Control vs SW480 Cisplatin 300M
Supplementary Table S11	GO Evaluation for DEGs in HCT116, HT29 and SW480 Cell line
Supplementary Table S12	Quality Control - Normal Samples and Tumor Samples
Supplementary Table S13	Cluster Annotation for Cell Types (Normal-Tumor)
Supplementary Table S14	Percentage and Number of Counts for Cell Types
Supplementary Table S15	Markers in Normal-Tumor Group

## Sheet: Table S1
Supplementary Table S1. Statistics of Colorectal Cancer Cell Line Transcriptome Mapping
SRA Study	Cell line	Treatment	Assay Type	Instrument	expression	Library Source
SRP345690			RNA-Seq	Illumina HiSeq 4000		Transcriptomic
Run			Total Reads	Trimmed Reads		alignment rate
SRR16924916	HCT116	Cisplatin 300M	13,771,747 (100%)	11,583,885 (84.11%)	8021	86.67%
SRR16924917	HCT116	Cisplatin 30M	17,595,055 (100%)	14,207,177 (80.75%)	13664	95.43%
SRR16924918	HCT116	Control	17,534,481 (100%)	13,921,197 (79.39%)	15026	94.94%
SRR16924919	SW480	Cisplatin 300M	20,891,844 (100%)	18,147,012 (86.86%)	8710	64.86%
SRR16924920	SW480	Cisplatin 30M	13,445,192 (100%)	11,092,177 (82.50%)	11132	89.69%
SRR16924921	SW480	Control	20,496,918 (100%)	16,637,216 (81.17%)	14587	91.76%
SRR16924922	HT29	Cisplatin 300M	13,327,775 (100%)	11,170,434 (83.81%)	9873	90.49%
SRR16924923	HT29	Cisplatin 30M	14,304,141 (100%)	11,383,032 (79.58%)	11797	96.59%
SRR16924924	HT29	Control	14,149,026 (100%)	11,707,766 (82.75%)	12722	90.03%
SRA Study	Cell line	Treatment	Assay Type	Instrument	expression	Library Source
SRP360190			RNA-Seq	Illumina NovaSeq 6000		Transcriptomic
Run			Total Reads	Trimmed Reads		alignment rate
SRR18053127	SW480	5FU	27,188,490 (100%)	23,716,036 (87.23%)	17981	90.44%
SRR18053128	SW480	5FU	21,937,806 (100%)	19,015,955 (86.68%)	17595	93.66%
SRR18053129	SW480	Control	26,848,700 (100%)	23,202,311 (86.42%0	17400	92.21%
SRR18053130	SW480	Control	50,735,636 (100%)	43,490,736 (85.72%)	19435	94.85%
SRR18053131	HCT116	5FU	22,552,980 (100%)	19,611,908 (86.96%)	17648	91.32%
SRR18053132	HCT116	5FU	25,654,906 (100%)	22,010,506 (85.79%)	18293	91.96%
SRR18053133	HCT116	Control	28,242,945 (100%)	24,271,533 (85.94%)	18220	91.22%
SRR18053134	HCT116	Control	31,130,201 (100%)	26,924,036 (86.49%)	18618	94.26%
SRA Study	Cell line	Treatment	Assay Type	Instrument	expression	Library Source
SRP351625			RNA-Seq	Illumina NovaSeq 6000		Transcriptomic
Run			Total Reads	Trimmed Reads		alignment rate
SRR17278324	HT29	Control	27,147,833 (100%)	23,143,336 (85.25%)	16577	96.51%
SRR17278328	HT29	Control	31,140,908 (100%)	26,854,988 (86.24%)	15877	96.81%
SRR17278329	HT29	Control	27,035,769 (100%)	23,301,760 (86.19%)	16864	95.66%

## Sheet: Table S2
Supplementary Table S2. Number of DEGs Between Different Doses for HCT116, HT29 and SW480 Cell Lines
Group	Upregulated Genes	Downregulated Genes
HCT116 Control vs HCT116 5-FU	276	1285
HCT116 Control vs HCT116 Cisplatin 30M	154	652
HCT116 Control vs HCT116 Cisplatin 300M	355	905
HT29 Control vs HT29 Cisplatin 30M	508	651
HT29 Control vs HT29 Cisplatin 300M	747	1193
SW480 Control vs SW480 5-FU	1286	1933
SW480 Control vs SW480 Cisplatin 30M	498	760
SW480 Control vs SW480 Cisplatin 300M	877	1332

## Sheet: Table S3
Supplementary Table S3. DEGs in HCT116 Control vs HCT116 5-Fluorouracil
UpregulatedGenes	baseMean	log2FoldChange	lfcSE	stat	pvalue	padj		DownregulatedGenes	baseMean	log2FoldChange	lfcSE	stat	pvalue	padj
DHRS2	97.7201	7.9934	0.96659	8.2697	1.34302e-16	4.45594e-13		BRD3OS	357.298	-25.6492	4.40773	-5.81913	5.91534e-09	3.29973e-06
IFI44	13.1672	7.07134	1.58441	4.46307	8.07919e-06	0.00236927		MAL2-AS1	354.618	-25.6428	4.40773	-5.81767	5.96721e-09	3.29973e-06
SCN1A	23.3491	6.62181	1.87588	3.52997	0.000415612	0.0652202		VASH1-AS1	326.686	-25.5249	4.40776	-5.7909	7.00108e-09	3.7814e-06
KIF1A	95.2844	6.55609	0.805086	8.14334	3.84527e-16	1.11633e-12		LOC112268088	282.966	-25.3267	4.40782	-5.74585	9.14596e-09	4.77747e-06
SPARC	25.2109	5.6798	1.03713	5.47644	4.33969e-08	1.90169e-05		ITGB1P1	279.459	-25.3177	4.40782	-5.74382	9.25667e-09	4.77747e-06
WNT7A	4.72247	5.59318	2.03015	2.75506	0.00586818	0.313549		TEX49	244.376	-25.1274	4.40788	-5.70057	1.19406e-08	6.02869e-06
GLIS3-AS2	16.2544	5.34403	1.17592	4.54457	5.50483e-06	0.0017277		LOC112268109	269.835	-24.8629	4.40784	-5.6406	1.69457e-08	8.19925e-06
IFIT3	55.633	5.31283	0.749128	7.09202	1.32164e-12	2.04635e-09		LOC105379243	185.81	-24.7582	3.96886	-6.2381	4.42917e-10	4.6758e-07
OASL	41.2988	5.26064	0.923886	5.69404	1.2407e-08	6.1309e-06		LOC112268189	157.992	-24.5377	3.39218	-7.23362	4.70277e-13	9.92926e-10
HOXD13	3.1526	5.00887	2.28774	2.18944	0.0285651	0.609764		LOC107986257	117.937	-24.1326	3.35779	-7.18705	6.62082e-13	1.28141e-09
NRG1	8.51981	4.92281	2.13666	2.30398	0.0212239	0.547694		ELOA-AS1	104.442	-23.9732	3.9102	-6.13095	8.73585e-10	8.45376e-07
ADD2	12.102	4.8783	1.63944	2.97559	0.00292425	0.212902		LINC01271	92.2979	-23.8041	3.90007	-6.1035	1.03769e-09	9.49076e-07
KRT38	14.5902	4.87074	1.11757	4.35831	1.3107e-05	0.00353967		LOC112268006	88.6546	-23.7472	3.89701	-6.09369	1.10334e-09	9.49076e-07
EN1	2.79708	4.83609	2.37922	2.03263	0.0420896	0.697241		LOC112268127	85.0113	-23.6928	3.89395	-6.08451	1.16847e-09	9.69201e-07
KRT37	27.6389	4.74675	0.966936	4.90906	9.15126e-07	0.000342803		LOC105369968	150.591	-23.6353	3.9456	-5.99029	2.09468e-09	1.24741e-06
KRT41P	5.0728	4.69222	1.63242	2.87439	0.00404805	0.259141		LOC100419715	80.4258	-23.6141	3.23995	-7.28842	3.13603e-13	7.28344e-10
APOBEC3G	10.6071	4.65543	1.65708	2.80942	0.00496311	0.285882		LOC107985428	77.8387	-23.567	3.31321	-7.11305	1.13507e-12	1.9924e-09
NAV3	36.5984	4.65288	0.931261	4.99632	5.84361e-07	0.00023003		MTND2P28	77.7246	-23.5636	3.88787	-6.06081	1.35441e-09	1.06689e-06
IFIT2	63.4272	4.65082	0.629326	7.39016	1.46648e-13	3.78432e-10		LOC105378443	75.4318	-23.5196	3.31017	-7.10525	1.20101e-12	1.9924e-09
CLMAT3	22.5289	4.52558	2.11083	2.14398	0.0320342	0.637527		LINC02458	74.0812	-23.4946	3.88489	-6.04769	1.46938e-09	1.06689e-06
USP14	653.137	4.47922	0.392173	11.4215	3.26401e-30	7.58066e-26		LINC00847	70.4379	-23.4388	3.88198	-6.03785	1.56186e-09	1.06689e-06
ARL4C	25.6685	4.28119	1.15801	3.69703	0.000218135	0.0398912		FOXCUT	66.7946	-23.3636	3.87916	-6.02286	1.71357e-09	1.10549e-06
IFIT1	59.4078	4.25135	0.941486	4.51558	6.31448e-06	0.00195538		LOC105378980	63.1512	-23.2852	3.87647	-6.0068	1.89223e-09	1.18776e-06
ITGA4	20.7714	4.17032	1.36064	3.06497	0.00217689	0.181864		MLF1-DT	60.7223	-23.2313	3.87332	-5.99776	2.00055e-09	1.2227e-06
VIM	13.4967	4.16547	1.05205	3.95939	7.51427e-05	0.0171097		CERS6-AS1	564.044	-11.349	2.89711	-3.91734	8.9533e-05	0.019617
LOC100129774	11.0217	4.12522	1.18305	3.48693	0.000488591	0.071368		LOC105373581	407.168	-11.3373	4.403	-2.57491	0.0100266	0.401541
MYOM1	37.3063	4.10571	0.832738	4.93038	8.20718e-07	0.000312478		WBP2NL	158.345	-11.1627	2.68208	-4.16195	3.15539e-05	0.00797828
EHD3	3.44938	4.09606	1.80606	2.26796	0.0233318	0.562117		LOC105378539	340.554	-11.0795	4.40306	-2.51632	0.0118586	0.432101
AQP3	12.5242	4.08378	1.50777	2.70848	0.00675922	0.334006		LOC105371887	440.034	-10.9889	2.91876	-3.76493	0.000166592	0.0330693
TBR1	9.20355	4.0789	1.58347	2.57592	0.00999747	0.401541		LOC105371566	111.979	-10.6623	2.9709	-3.5889	0.000332073	0.0539329
ISG15	111.758	4.02108	0.780344	5.15295	2.56421e-07	0.000102679		LOC105369663	244.204	-10.599	4.40318	-2.40712	0.0160787	0.493952
TYMS	1326.59	3.99933	0.482132	8.29509	1.085e-16	4.19984e-13		LOC107984247	220.188	-10.4496	4.40104	-2.37434	0.0175803	0.513558
ANK1	19.0578	3.89418	0.89026	4.37421	1.21875e-05	0.00333005		MID1IP1-AS1	84.2752	-10.2486	2.83161	-3.61935	0.000295342	0.0497052
NDC80	194.756	3.87736	0.689523	5.62324	1.87406e-08	8.88266e-06		CA4	172.361	-9.90862	2.59505	-3.81827	0.000134389	0.0274257
YES1	420.098	3.85518	0.419215	9.19617	3.70939e-20	4.30753e-16		HSPA12A-AS1	63.6738	-9.8402	2.7965	-3.51876	0.000433574	0.0662524
EMILIN2	44.77	3.84516	0.636341	6.04261	1.51641e-09	1.06689e-06		GAS5-AS1	188.066	-9.83343	2.62124	-3.75144	0.000175823	0.0343312
KRT15	10.8502	3.81676	1.24699	3.06077	0.00220769	0.182276		MTATP6P1	58.9779	-9.73225	3.08883	-3.15079	0.0016283	0.151876
METTL4	47.7722	3.78836	0.628339	6.02916	1.64814e-09	1.09366e-06		LOC112268147	58.4296	-9.72028	3.28661	-2.95754	0.003101	0.222287
KRT12	5.77922	3.78257	1.32575	2.85316	0.00432871	0.268939		PCDH7	55.6377	-9.67146	1.54387	-6.26444	3.7417e-10	4.13815e-07
LOC105371952	11.9966	3.76355	1.09175	3.44726	0.000566293	0.0788869		KLC2-AS2	56.2289	-9.65921	2.82203	-3.42279	0.000619825	0.0816594
SH3TC2	17.9748	3.64347	0.928115	3.92566	8.64907e-05	0.0191309		XYLT1	55.3636	-9.62202	2.18607	-4.40152	1.07498e-05	0.00300799
ZBTB18	15.272	3.49064	0.930511	3.75132	0.000175906	0.0343312		LOC100419862	52.2212	-9.56076	3.86886	-2.47121	0.0134656	0.455951
SMCHD1	1093.73	3.46625	1.15313	3.00595	0.00264756	0.198995		CCDC152	135.087	-9.516	1.44294	-6.59486	4.25664e-11	4.94302e-08
FGFBP1	5.82113	3.40423	1.34539	2.5303	0.0113965	0.424854		LOC105370062	111.83	-9.44015	3.46658	-2.72319	0.00646553	0.329541
TYMSOS	4437.62	3.34989	0.554779	6.03824	1.55807e-09	1.06689e-06		LOC112268213	47.3634	-9.41905	3.86725	-2.43559	0.0148674	0.476086
GLIS3-AS1	48.2704	3.30924	0.834948	3.96341	7.38856e-05	0.01699		PITPNA-AS1	46.149	-9.38134	3.86843	-2.4251	0.0153041	0.483589
KRT32	27.9309	3.30786	0.860616	3.84359	0.000121248	0.0253692		GNRHR2	210.665	-9.36327	2.66959	-3.50738	0.000452537	0.0673729
LPIN2	128.113	3.25386	0.477603	6.81289	9.56602e-12	1.23428e-08		TSSK5P	45.1627	-9.3445	3.18534	-2.93359	0.00335062	0.233688
IGFBP6	25.3261	3.24404	1.15016	2.8205	0.00479484	0.280504		LOC105372989	98.4708	-9.25523	3.45392	-2.67963	0.0073703	0.347212
SERPINA1	11.6561	3.09955	1.0496	2.95308	0.0031462	0.224142		NCMAP-DT	40.0767	-9.17641	3.86781	-2.37251	0.0176677	0.513558
SYTL2	92.1201	3.05459	0.501181	6.09478	1.09589e-09	9.49076e-07		LOC105370705	38.9764	-9.13048	3.25798	-2.8025	0.00507081	0.285882
C2orf74	3.4698	3.01586	1.47604	2.04321	0.0410317	0.69036		SLC25A1P5	38.2845	-9.09299	2.65983	-3.41863	0.000629367	0.0816594
KRT35	35.5753	3.00465	0.819472	3.66657	0.000245829	0.0439183		LINC00896	37.6478	-9.08553	3.86842	-2.34864	0.0188421	0.528894
MUC2	3.54541	3.00045	1.49074	2.01273	0.0441434	0.712553		LOC107984715	37.6478	-9.08553	3.86842	-2.34864	0.0188421	0.528894
TENM3	7.53888	2.99501	1.30123	2.30168	0.0213534	0.547752		LOC283038	37.6478	-9.08553	3.86842	-2.34864	0.0188421	0.528894
VCAN	586.199	2.947	1.19348	2.46925	0.0135398	0.456902		HOXB-AS4	37.7619	-9.08426	3.25614	-2.78988	0.0052727	0.29508
MAGEB17	204.803	2.9039	0.467496	6.21161	5.24455e-10	5.29585e-07		TP73-AS1	36.7057	-9.04175	3.1701	-2.8522	0.00434184	0.268939
COL13A1	32.2858	2.88937	0.800314	3.6103	0.000305847	0.0511029		LOC100418961	36.4334	-9.03785	3.86828	-2.3364	0.0194704	0.531999
NPAS2	58.5783	2.82877	0.525981	5.37807	7.52868e-08	3.23803e-05		LOC105371483	35.219	-8.98854	3.86922	-2.32309	0.0201746	0.536622
ENOSF1	9895.07	2.80794	0.865338	3.24491	0.00117488	0.121815		LOC105377769	35.219	-8.98854	3.86922	-2.32309	0.0201746	0.536622
DOCK10	16.2467	2.78626	0.839052	3.32073	0.000897822	0.101717		LOC107986152	35.219	-8.98854	3.86922	-2.32309	0.0201746	0.536622
KRT36	17.4544	2.75865	0.914213	3.01752	0.00254855	0.198981		RNA5SP216	35.219	-8.98854	3.86922	-2.32309	0.0201746	0.536622
SCN9A	6.08135	2.75557	1.22452	2.25034	0.0244276	0.576471		LOC105369632	35.4692	-8.98542	2.84776	-3.15526	0.00160356	0.150172
SUSD2	29.3609	2.72992	0.831416	3.28346	0.00102542	0.110619		ZMYND15	89.2778	-8.95416	2.64427	-3.38626	0.000708533	0.0875302
XRCC4	52.0203	2.65159	0.67184	3.94676	7.92156e-05	0.017862		CLEC20A	31.5756	-8.82963	3.87319	-2.27968	0.0226268	0.553166
KRT39	5.15257	2.63851	1.29325	2.04022	0.0413286	0.69154		LOC102724682	31.5756	-8.82963	3.87319	-2.27968	0.0226268	0.553166
NAT8	12.1261	2.60161	1.04306	2.49422	0.0126234	0.447602		LOC107984450	31.5756	-8.82963	3.87319	-2.27968	0.0226268	0.553166
PRELID3A	7.12467	2.58995	1.11425	2.3244	0.0201043	0.536622		SNHG29	31.5756	-8.82963	3.87319	-2.27968	0.0226268	0.553166
MT1X	7.93029	2.58642	1.25955	2.05345	0.0400294	0.685745		LIPM	31.9399	-8.82911	2.76229	-3.1963	0.00139204	0.139354
FDXACB1	9.19371	2.56672	1.05342	2.43657	0.0148274	0.476086		LOC105369782	212.572	-8.80466	2.46353	-3.574	0.00035157	0.0567028
CCN1	34.0844	2.50564	0.677028	3.70094	0.000214805	0.0397531		ZNF91	29.5092	-8.77368	2.26955	-3.86582	0.000110715	0.0235905
GLIS3	18.802	2.50018	0.953967	2.62082	0.00877176	0.373121		LOC642361	30.3612	-8.77254	3.87527	-2.26372	0.0235913	0.564351
HERC5	85.4145	2.49536	0.478288	5.21728	1.81569e-07	7.53024e-05		RNA5SP352	30.3612	-8.77254	3.87527	-2.26372	0.0235913	0.564351
IFIH1	28.8135	2.43388	0.653431	3.72477	0.000195495	0.0378364		TMEM200B	273.053	-8.76864	2.5364	-3.45712	0.000545974	0.0774416
PPFIBP1	169.661	2.42937	0.548357	4.43027	9.41157e-06	0.00269856		LOC112268055	160.79	-8.72257	2.68215	-3.25208	0.00114565	0.120397
BIRC3	9.89459	2.42777	1.01168	2.39975	0.0164061	0.496311		LOC105372061	29.1467	-8.71307	3.87751	-2.24708	0.0246349	0.57676
THOC1	276.15	2.41164	1.03053	2.34019	0.0192739	0.529064		LOC105370174	87.8667	-8.65343	2.95574	-2.92767	0.00341517	0.236064
SERINC2	53.7472	2.3941	0.575285	4.16159	3.1604e-05	0.00797828		LOC107984826	27.9323	-8.65106	3.88011	-2.22959	0.0257747	0.583651
CSF1	12.1521	2.37207	1.06116	2.23536	0.0253935	0.58162		LOC107985729	26.7178	-8.58626	3.88208	-2.21177	0.0269827	0.596199
SERPINE1	25.3818	2.3618	0.765596	3.08492	0.00203607	0.17523		RNU7-111P	26.854	-8.58531	3.24157	-2.64851	0.00808485	0.359714
MB21D2	10.7352	2.35202	0.965072	2.43714	0.0148039	0.476086		LOC107986281	25.6175	-8.51607	3.24026	-2.62821	0.00858358	0.369858
TACSTD2	7.47556	2.34511	1.0846	2.16218	0.030604	0.619321		LOC107986003	332.683	-8.51568	2.64127	-3.22409	0.00126375	0.12987
GRPR	51.7404	2.32347	0.561994	4.13434	3.55977e-05	0.00888985		ADGRF1	25.5576	-8.48908	1.60867	-5.27707	1.31265e-07	5.54298e-05
APOBEC3B	19.259	2.30766	0.921012	2.50557	0.0122255	0.438853		LOC101927556	728.168	-8.40916	2.39036	-3.51794	0.000434908	0.0662524
ILDR1	10.6165	2.30203	0.988986	2.32766	0.01993	0.536622		LOC105379173	191.191	-8.29806	2.69799	-3.07564	0.00210051	0.177397
MYL12B	244.736	2.30115	0.805831	2.85562	0.00429529	0.268939		INE2	22.0882	-8.29612	3.14554	-2.63742	0.00835381	0.365381
ZC3HAV1	111.313	2.2904	0.63054	3.63244	0.000280757	0.0479454		LOC107986265	21.86	-8.29342	3.90027	-2.12637	0.0334724	0.645954
OR52W1	12.0332	2.21552	1.05803	2.094	0.0362602	0.665199		WDR86	256.583	-8.27287	2.04045	-4.05444	5.02545e-05	0.0121579
APOL2	22.5857	2.20653	0.693445	3.18198	0.00146271	0.14387		LOC112268196	258.254	-8.2705	2.65794	-3.11162	0.00186064	0.165568
ANO1	124.466	2.18409	0.751028	2.90814	0.00363591	0.246897		RNU6-395P	66.9488	-8.23805	3.41076	-2.41532	0.0157215	0.489454
KCNAB2	11.3864	2.1681	0.964506	2.24789	0.0245832	0.576471		LIF-AS1	20.6456	-8.20991	3.90679	-2.10145	0.0356017	0.660056
TRHR	16.0531	2.15097	0.893429	2.40754	0.0160603	0.493952		LOC105376294	20.6456	-8.20991	3.90679	-2.10145	0.0356017	0.660056
CLCN6	22.7682	2.13926	0.866665	2.46838	0.0135726	0.456902		LOC107985878	21.0099	-8.20725	2.7248	-3.01206	0.00259484	0.198995
CAVIN3	8.27677	2.13098	1.06507	2.00078	0.0454156	0.718514		MIR196B	111.984	-8.19634	3.01408	-2.71935	0.00654112	0.330975
KRT13	17.1068	2.10924	0.812969	2.59449	0.00947302	0.390796		LOC112268432	52.4359	-8.18699	2.97322	-2.75358	0.00589478	0.313549
MICAL2	51.6262	2.09008	0.707207	2.9554	0.00312266	0.22315		GP6-AS1	19.4311	-8.12127	3.91474	-2.07454	0.0380295	0.673913
LIF	31.7977	2.08565	0.768928	2.71241	0.00667951	0.3329		LOC107986760	19.4311	-8.12127	3.91474	-2.07454	0.0380295	0.673913
LPIN1	42.9532	2.08112	0.888804	2.34148	0.0192076	0.52897		MIR12136	19.4311	-8.12127	3.91474	-2.07454	0.0380295	0.673913
SEH1L	124.686	2.07332	0.665856	3.11376	0.00184719	0.165003		OGFR-AS1	19.4311	-8.12127	3.91474	-2.07454	0.0380295	0.673913
THBS1	62.9049	2.03514	0.987587	2.06072	0.0393301	0.681319		LOC107985106	103.755	-8.08642	2.62833	-3.07663	0.00209353	0.177397
ATOX1	20.7125	2.01922	0.78857	2.56061	0.010449	0.405815		LOC105371490	57.2332	-8.05597	3.40294	-2.36735	0.0179158	0.518821
PLAU	40.2208	2.01128	0.549309	3.66147	0.000250768	0.0441218		ZNF503-AS2	86.5558	-8.04657	2.30446	-3.49173	0.000479899	0.0705421
HSPH1	240.087	2.00772	0.759302	2.64417	0.00818922	0.362967		BAIAP2-DT	18.4449	-8.02982	3.14403	-2.55399	0.0106496	0.410178
ETS1	11.1492	1.98537	0.999444	1.98647	0.0469809	0.72879		LOC100288175	18.2167	-8.02685	3.92347	-2.04586	0.0407706	0.689195
TINAGL1	48.8203	1.98393	0.683262	2.90361	0.00368884	0.246897		POM121L1P	18.2167	-8.02685	3.92347	-2.04586	0.0407706	0.689195
DKK1	220.625	1.97837	0.406381	4.86827	1.12581e-06	0.000415032		XNDC1N-ZNF705EP-ALG1L9P	18.2167	-8.02685	3.92347	-2.04586	0.0407706	0.689195
VSNL1	43.1789	1.97732	0.675247	2.92829	0.00340833	0.236064		LOC107984262	18.4669	-8.01796	2.79842	-2.86518	0.00416773	0.265193
P4HA2	39.7801	1.96532	0.593142	3.3134	0.000921682	0.102421		LIMD1-AS1	270.705	-7.97554	2.35345	-3.38888	0.000701793	0.0871612
OGFRL1	33.8583	1.95211	0.696292	2.80358	0.00505385	0.285882		LOC107984974	95.6404	-7.96827	2.32679	-3.42457	0.00061577	0.0816594
ULBP2	15.8134	1.92146	0.957532	2.00668	0.0447835	0.715765		SH3BGRL	18.3229	-7.95146	1.76253	-4.51139	6.44057e-06	0.00196819
OR51I1	11.3417	1.91251	0.97444	1.96267	0.0496843	0.742585		LOC112268166	114.46	-7.9363	3.34429	-2.37309	0.0176399	0.513558
TIGAR	17.3573	1.89903	0.797367	2.38163	0.0172363	0.508617		LOC100419515	17.0023	-7.92582	3.93378	-2.01481	0.0439246	0.711138
OAS3	44.9912	1.89591	0.629934	3.0097	0.00261508	0.198995		SNHG6	17.0023	-7.92582	3.93378	-2.01481	0.0439246	0.711138
SLC20A1	141.262	1.8636	0.516632	3.6072	0.000309519	0.0513471		LERFS	17.1163	-7.92161	3.23781	-2.4466	0.0144211	0.470408
HCAR2	28.4647	1.85678	0.686835	2.70339	0.00686365	0.337015		LOC102723493	15.7878	-7.81722	3.94613	-1.98098	0.0475932	0.731123
LOC100505502	15.5793	1.84542	0.934902	1.97391	0.0483914	0.735729		PVT1	15.7878	-7.81722	3.94613	-1.98098	0.0475932	0.731123
SEMA3B	21.73	1.83069	0.791041	2.31429	0.0206521	0.539533		TMEM88B	15.7878	-7.81722	3.94613	-1.98098	0.0475932	0.731123
NDUFV2	85.7855	1.82198	0.474426	3.84039	0.000122841	0.0254732		ANKRD18EP	15.924	-7.8147	3.2398	-2.4121	0.0158611	0.491124
POLR2G	12.5456	1.81288	0.806408	2.24809	0.0245705	0.576471		LOC105376938	15.924	-7.8147	3.2398	-2.4121	0.0158611	0.491124
HYOU1	219.93	1.8124	0.536842	3.37604	0.00073538	0.0889335		TRB	16.1668	-7.78501	2.29644	-3.39003	0.000698842	0.0871612
ADAMTS14	19.1758	1.81122	0.682948	2.65206	0.00800028	0.357284		LOC107987113	46.3032	-7.7476	3.39041	-2.28515	0.0223039	0.553166
ACO1	156.105	1.80527	0.658722	2.74057	0.00613327	0.319384		ZNF230-DT	14.2967	-7.69515	1.66399	-4.6245	3.75498e-06	0.00124585
FAM83D	37.6652	1.80149	0.917072	1.96439	0.049485	0.742463		SPIN4-AS1	14.8236	-7.6876	2.787	-2.75837	0.00580896	0.313024
FLG	18.1453	1.79661	0.885627	2.02863	0.0424956	0.69898		LOC105373422	43.8743	-7.66905	3.38789	-2.26367	0.0235946	0.564351
RBM19	44.1639	1.79313	0.811924	2.2085	0.0272098	0.59658		LOC107987285	349.642	-7.63279	2.1745	-3.51014	0.000447868	0.0673729
KCNN4	28.4797	1.78738	0.63867	2.79859	0.00513261	0.288632		HP11014	91.5216	-7.59828	2.88771	-2.63125	0.00850723	0.368831
PDIA4	412.02	1.78407	0.517843	3.4452	0.000570635	0.0788869		LOC112268048	337.59	-7.58196	2.15432	-3.51942	0.000432499	0.0662524
PPME1	85.8007	1.76835	0.606319	2.91654	0.00353943	0.243205		LOC107985322	13.473	-7.56626	3.24634	-2.33071	0.0197689	0.536622
ZBTB38	94.7019	1.76682	0.756107	2.33673	0.0194534	0.531999		LOC105375785	61.1739	-7.55911	2.57647	-2.9339	0.00334731	0.233688
PTPN2	37.1394	1.73968	0.575613	3.02231	0.00250854	0.198166		LOC107986845	40.2309	-7.54252	3.38427	-2.2287	0.0258339	0.583651
MDM2	174.503	1.73749	0.637679	2.72471	0.00643571	0.329541		GPR37L1	68.0283	-7.46903	2.16791	-3.44527	0.000570497	0.0788869
TMED9	120.191	1.72528	0.831082	2.07594	0.0378991	0.673913		MAL2	31.7132	-7.43853	1.59586	-4.66115	3.14446e-06	0.00107397
SDF2L1	21.0394	1.7224	0.664367	2.59255	0.0095267	0.391982		TNRC17	12.6449	-7.43295	2.59587	-2.86338	0.0041915	0.265977
MAP1B	131.618	1.71786	0.664407	2.58555	0.00972241	0.396314		ABCF1-DT	12.2806	-7.4282	3.25137	-2.28464	0.0223342	0.553166
DDX58	86.9983	1.71645	0.537501	3.19339	0.00140614	0.140161		DEFB109F	12.2806	-7.4282	3.25137	-2.28464	0.0223342	0.553166
AK1	13.9999	1.6985	0.756353	2.24565	0.0247267	0.577133		MRPL23-AS1	12.2586	-7.42537	3.25122	-2.28387	0.0223791	0.553166
NAPG	57.2163	1.69801	0.597593	2.84142	0.00449127	0.269904		TEX52	12.2586	-7.42537	3.25122	-2.28387	0.0223791	0.553166
FBXL18	14.3363	1.69487	0.816051	2.07691	0.0378098	0.673913		LOC107987181	12.3947	-7.41617	2.77896	-2.66868	0.007615	0.351607
MTCL1	122.383	1.6942	0.653001	2.59448	0.00947333	0.390796		BMP6	457.885	-7.41498	1.99264	-3.72119	0.000198288	0.0380599
PARP12	16.3735	1.69215	0.822892	2.05635	0.0397489	0.683722		LOC112268218	63.6563	-7.37274	2.39147	-3.08294	0.00204967	0.17523
TUBB3	86.0837	1.68791	0.46632	3.61964	0.000295015	0.0497052		LOC105370974	10.6092	-7.36226	1.84711	-3.98582	6.72466e-05	0.0157758
POP4	17.5371	1.68664	0.81452	2.07072	0.038385	0.674116		SCAND2P	97.1931	-7.32088	2.17383	-3.36773	0.000757885	0.0907313
NES	36.5085	1.68589	0.624734	2.69857	0.0069639	0.340498		ZNF22-AS1	11.2723	-7.29408	3.09388	-2.35758	0.0183943	0.526888
PTPRJ	65.1332	1.68537	0.789597	2.13447	0.0328041	0.641572		PKLR	11.5446	-7.28755	2.53178	-2.87843	0.00399654	0.257118
SKP2	37.8626	1.68534	0.592462	2.84463	0.00444627	0.269626		HSPE1	11.0662	-7.27247	3.25715	-2.23277	0.0255639	0.582652
TNFAIP3	10.6841	1.6707	0.828923	2.01551	0.0438509	0.711138		IGF2BP2-AS1	11.0441	-7.2693	3.257	-2.2319	0.0256214	0.582817
TNS3	25.086	1.66967	0.683602	2.44246	0.0145876	0.472519		LOC105375800	11.3052	-7.24896	2.35782	-3.07443	0.00210903	0.177472
ACOT7	74.74	1.65196	0.485292	3.40405	0.000663939	0.085151		MFSD4A-AS1	11.1139	-7.2058	1.94756	-3.69992	0.000215668	0.0397531
SLC25A33	27.1585	1.65137	0.627648	2.63105	0.00851215	0.368831		ZFAS1	27.0687	-7.19893	2.61416	-2.75382	0.00589038	0.313549
PCSK9	63.4669	1.62943	0.65641	2.48233	0.0130526	0.451111		LINC01764	108.294	-7.13873	2.38904	-2.98811	0.00280707	0.208956
SRM	50.7362	1.6232	0.524048	3.09742	0.00195215	0.173048		LOC105372273	10.3301	-7.1144	2.52178	-2.82118	0.0047848	0.280504
UNC13A	82.0996	1.61952	0.577684	2.80347	0.00505558	0.285882		LOC100418723	9.94374	-7.10744	3.15947	-2.24957	0.0244764	0.576471
MAPRE2	22.8797	1.61873	0.640448	2.5275	0.0114878	0.426887		IL10RB-DT	9.82966	-7.09444	3.26612	-2.17213	0.0298458	0.615056
TRIM5	27.8489	1.61693	0.754081	2.14424	0.0320133	0.637527		LINC02930	9.82966	-7.09444	3.26612	-2.17213	0.0298458	0.615056
WWTR1	62.0683	1.6076	0.484526	3.31789	0.000907018	0.10179		RLIMP2	9.82966	-7.09444	3.26612	-2.17213	0.0298458	0.615056
ZDBF2	54.2278	1.60388	0.77934	2.058	0.0395901	0.683722		LOC105371099	24.7318	-7.07494	2.79377	-2.5324	0.0113284	0.422994
BABAM2	21.6858	1.59425	0.744379	2.14172	0.0322161	0.640599		DAPK1	8.63318	-7.06786	1.85127	-3.81785	0.000134619	0.0274257
ANKRD12	101.37	1.59043	0.519745	3.06002	0.00221321	0.182276		PLD4	319.757	-7.06693	1.92919	-3.66316	0.00024912	0.0441218
IRAK1	46.64	1.59016	0.778862	2.04164	0.0411873	0.691063		OSCAR	8.58164	-7.04676	2.28526	-3.08357	0.00204531	0.17523
NT5DC3	41.5549	1.57375	0.768253	2.04848	0.0405134	0.689195		GRHL2	24.0446	-7.03358	1.53055	-4.59545	4.31809e-06	0.0014125
STX5	25.8575	1.57017	0.622067	2.52411	0.011599	0.427392		LOC728673	23.1751	-6.99924	3.36294	-2.08129	0.0374076	0.672438
MICALL1	32.1671	1.56999	0.588604	2.6673	0.00764627	0.35235		LOC105372496	26.1139	-6.93622	2.77161	-2.50259	0.0123287	0.441192
POMGNT1	124.764	1.56774	0.4236	3.70099	0.000214756	0.0397531		LOC105369761	8.77342	-6.91895	3.16939	-2.18306	0.0290316	0.613683
RALBP1	197.041	1.56726	0.386052	4.05971	4.91341e-05	0.012012		PTRH1	343.958	-6.91803	2.24344	-3.08367	0.00204463	0.17523
LMAN1	138.793	1.56704	0.718537	2.18087	0.0291927	0.614309		ZNF649	7.77928	-6.91007	2.29678	-3.00859	0.00262465	0.198995
CTSD	71.9848	1.56639	0.482059	3.24937	0.00115661	0.120693		LINC01637	8.63727	-6.89984	3.27872	-2.10443	0.035341	0.660056
PPP4R1	74.1237	1.56355	0.656627	2.38119	0.0172568	0.508617		LOC101929506	8.61521	-6.89567	3.27859	-2.10324	0.0354444	0.660056
KBTBD6	28.3424	1.56183	0.680327	2.2957	0.021693	0.547752		LOC105376939	8.61521	-6.89567	3.27859	-2.10324	0.0354444	0.660056
CITED2	19.8951	1.55665	0.734555	2.11917	0.0340757	0.651289		LOC107984344	8.86544	-6.89162	2.67167	-2.57952	0.00989377	0.399622
MAP4K4	316.361	1.52707	0.599126	2.54883	0.0108086	0.411522		STK32A	96.0603	-6.86312	1.13559	-6.04365	1.50667e-09	1.06689e-06
APOBEC3C	45.6997	1.52523	0.56979	2.67683	0.00743219	0.347309		ZBTB45P2	63.4993	-6.85234	2.04272	-3.35451	0.000795046	0.0942089
AMOTL2	30.5769	1.50843	0.598058	2.52221	0.0116621	0.42833		NKX6-2	132.282	-6.83894	1.99921	-3.42082	0.000624325	0.0816594
ARFGEF3	31.421	1.50582	0.704666	2.13693	0.0326037	0.641572		MKX-AS1	7.70208	-6.81573	1.84887	-3.68642	0.000227427	0.0412656
SERPINH1	107.209	1.49542	0.485629	3.07934	0.00207459	0.176492		ID4	21.1442	-6.78529	2.04868	-3.31204	0.000926183	0.102431
CCND1	498.255	1.49017	0.523286	2.84772	0.00440334	0.269626		RPRM	6.84831	-6.73395	2.31478	-2.90911	0.00362454	0.246862
NFIB	35.4153	1.48966	0.687213	2.16768	0.0301832	0.616678		SYK	6.80041	-6.72272	2.32623	-2.88996	0.0038529	0.252323
CNTNAP3	22.5876	1.48891	0.692263	2.15078	0.0314932	0.630544		ZFAND2A-DT	7.69512	-6.71842	3.11964	-2.15358	0.0312727	0.627752
AIFM2	33.1557	1.47763	0.639622	2.31016	0.0208796	0.543032		ZNF850	6.73799	-6.71098	2.32776	-2.88302	0.00393879	0.255825
OSBPL3	69.0828	1.47259	0.547869	2.68786	0.00719119	0.345406		ENPP7P5	7.92329	-6.69655	2.50068	-2.6779	0.00740859	0.347309
SLC35B1	16.5937	1.47235	0.746426	1.97254	0.0485483	0.735729		ZNF724	6.6718	-6.6955	2.35019	-2.84892	0.00438685	0.269536
RUNX1	38.6103	1.46831	0.561134	2.61669	0.00887873	0.376981		LOC105371998	63.5603	-6.69331	2.89945	-2.30848	0.0209725	0.543856
AHDC1	37.3986	1.4655	0.707069	2.07264	0.0382059	0.674116		MIR1279	7.55898	-6.69311	3.18397	-2.10213	0.035542	0.660056
CRIM1	91.8528	1.45472	0.682631	2.13105	0.0330847	0.643545		ZNF497-AS1	7.80921	-6.68853	2.60928	-2.56336	0.0103665	0.405456
DHCR7	54.719	1.45327	0.684884	2.12192	0.0338449	0.648553		EHHADH-AS1	22.1504	-6.68425	2.91609	-2.29219	0.0218944	0.548541
DDIAS	21.6424	1.44928	0.721529	2.00862	0.0445773	0.715465		HLA-DQB1-AS1	7.51485	-6.68334	3.18348	-2.09938	0.0357832	0.661675
NCAPD2	186.69	1.44567	0.660801	2.18775	0.0286877	0.610699		LOC107986929	7.76508	-6.67806	2.60778	-2.56082	0.0104425	0.405815
ITGB4	462.204	1.44416	0.595321	2.42585	0.0152728	0.483589		ABI1P1	7.42283	-6.67038	3.29654	-2.02345	0.0430269	0.705159
PAAF1	16.6691	1.44224	0.695328	2.07418	0.0380623	0.673913		GSTA8P	7.40076	-6.66545	3.29643	-2.02202	0.0431744	0.705159
PRKAA1	46.1911	1.42836	0.617616	2.31269	0.0207395	0.540706		LINC01978	7.40076	-6.66545	3.29643	-2.02202	0.0431744	0.705159
USP35	16.8001	1.42723	0.723666	1.97222	0.0485847	0.735729		LOC105374297	7.40076	-6.66545	3.29643	-2.02202	0.0431744	0.705159
DNAJB11	118.493	1.42325	0.50097	2.84099	0.00449744	0.269904		LINC00987	103.48	-6.66273	1.9476	-3.421	0.00062391	0.0816594
NUCB2	62.0568	1.42208	0.518578	2.74227	0.0061016	0.319187		ADORA2A-AS1	22.0142	-6.65664	3.37628	-1.97159	0.0486562	0.735729
GPC4	37.1394	1.41694	0.62893	2.25293	0.0242634	0.575483		LOC105369380	7.53691	-6.64724	2.76744	-2.40195	0.0163082	0.494708
DPM1	29.6652	1.40506	0.691529	2.03181	0.042173	0.697357		LOC112268021	7.53691	-6.64724	2.76744	-2.40195	0.0163082	0.494708
GMPPA	31.5316	1.4035	0.583663	2.40464	0.0161883	0.494708		GTF2IRD1P1	123.699	-6.64341	2.48726	-2.67098	0.00756301	0.349902
PSMD2	276.383	1.40251	0.627875	2.23374	0.0254999	0.581763		SELENOP	6.44727	-6.63563	1.88082	-3.52805	0.00041863	0.0652529
HERPUD1	50.3283	1.39781	0.66106	2.11449	0.0344734	0.654353		FOXD3-AS1	7.70978	-6.61983	2.15778	-3.06789	0.00215575	0.180748
HSPA5	593.747	1.39537	0.407328	3.42568	0.000613264	0.0816594		ZNF607	6.34072	-6.60051	1.98564	-3.32413	0.000886962	0.100979
IDH1	104.308	1.38301	0.601526	2.29917	0.0214953	0.547752		SHE	47.1096	-6.59883	2.35454	-2.8026	0.00506929	0.285882
CDK6	25.33	1.38024	0.688279	2.00535	0.0449258	0.715765		LOC107985317	7.31976	-6.59434	2.13702	-3.08576	0.00203035	0.17523
HMMR	42.9969	1.37923	0.631921	2.18259	0.0290657	0.613683		ZNF595	6.10138	-6.57256	2.357	-2.78853	0.00529486	0.295436
PSMD11	91.7957	1.37549	0.602884	2.28152	0.0225175	0.553166		MACC1	6.21533	-6.57052	1.94543	-3.37742	0.000731693	0.0889335
SERPINE2	133.218	1.36723	0.416746	3.28072	0.00103541	0.110818		LOC730098	36.4341	-6.53295	1.79624	-3.63702	0.000275809	0.0474493
PLAUR	46.9825	1.3634	0.534378	2.55137	0.0107301	0.410921		FRMD7	107.744	-6.53249	2.57509	-2.5368	0.0111871	0.420238
TGIF1	148.532	1.36232	0.388232	3.50905	0.000449713	0.0673729		LOC105376095	5.9947	-6.52512	1.9023	-3.43012	0.000603321	0.0816594
FOSL1	39.7032	1.35046	0.682573	1.97848	0.0478749	0.732956		ADNP-AS1	19.6994	-6.50934	2.91081	-2.23626	0.0253346	0.580886
PSMA1	61.7235	1.33719	0.597734	2.23709	0.0252804	0.580886		KHSRPP1	6.24858	-6.46636	1.86745	-3.46266	0.000534868	0.076681
TSPYL2	57.9908	1.33107	0.574119	2.31846	0.0204246	0.53803		RNU6-415P	6.48068	-6.45699	3.13821	-2.05754	0.0396347	0.683722
PDIA5	60.6937	1.32754	0.533119	2.49015	0.0127691	0.449337		FLRT3	5.59714	-6.45373	2.36242	-2.73183	0.00629842	0.32652
TGM2	19.7985	1.3271	0.641221	2.06965	0.0384853	0.675092		ZNF649-AS1	16.0186	-6.45353	1.58153	-4.08056	4.49267e-05	0.0111002
MT2A	149.057	1.32464	0.510264	2.59598	0.00943209	0.390482		ZC4H2	6.16409	-6.44869	1.88992	-3.41215	0.000644525	0.0831617
TM9SF1	31.4464	1.32396	0.565564	2.34095	0.0192346	0.52897		ZNF577	5.69657	-6.44689	1.90149	-3.39044	0.000697817	0.0871612
CLU	103.239	1.30965	0.529448	2.47361	0.0133756	0.455951		LOC100128653	6.66472	-6.43228	2.55723	-2.51533	0.011892	0.432225
MTMR12	47.0508	1.30814	0.654492	1.99871	0.04564	0.721081		LOC100131884	6.34453	-6.42605	3.20503	-2.00499	0.0449645	0.715765
GRK5	25.5589	1.30798	0.666788	1.96161	0.0498083	0.742585		POM121L7P	6.34453	-6.42605	3.20503	-2.00499	0.0449645	0.715765
CHMP1B	35.3254	1.29905	0.635361	2.04458	0.0408962	0.68981		LOC105372411	16.3889	-6.42538	2.4214	-2.65358	0.00796428	0.357284
GCC1	26.8162	1.29858	0.63258	2.05283	0.0400891	0.685745		LOC105371824	80.9509	-6.42195	1.38271	-4.64446	3.40969e-06	0.00114768
PDIA6	187.31	1.285	0.42854	2.99855	0.00271264	0.203229		NSUN7	428.002	-6.41644	1.86606	-3.4385	0.000584948	0.080387
UFD1	57.1734	1.28361	0.610259	2.10338	0.0354322	0.660056		LOC105370274	6.3004	-6.41419	3.2046	-2.00156	0.0453323	0.717684
KRT19	367.742	1.27802	0.410222	3.11542	0.00183681	0.164993		MIR6080	6.3004	-6.41419	3.2046	-2.00156	0.0453323	0.717684
MYEOV	37.2816	1.27601	0.597609	2.13519	0.0327455	0.641572		HKDC1	5.34691	-6.39013	2.37524	-2.69031	0.0071385	0.345131
MANF	81.5432	1.27398	0.439477	2.89885	0.0037453	0.248527		KLF9-DT	6.32247	-6.36931	2.76725	-2.30167	0.0213536	0.547752
C1GALT1C1	68.6512	1.27101	0.616219	2.06259	0.0391514	0.67959		CD33	5.35809	-6.35156	1.93496	-3.28253	0.00102879	0.110619
TWSG1	37.1564	1.26768	0.54395	2.33051	0.0197791	0.536622		LOC107984839	136.332	-6.32534	2.43623	-2.59637	0.00942156	0.390482
PGD	280.505	1.26541	0.603912	2.09535	0.0361395	0.665087		LOC105370792	118.798	-6.32251	2.04974	-3.08455	0.00203864	0.17523
KCNV2	72.9878	1.25541	0.593359	2.11578	0.0343639	0.653452		ZNF350	5.29567	-6.3167	2.18013	-2.8974	0.00376276	0.248974
ACLY	462.109	1.25255	0.525988	2.38132	0.0172507	0.508617		LOC107986961	6.29299	-6.3163	2.21971	-2.84556	0.00443335	0.269626
PSMC2	100.198	1.24526	0.43329	2.87396	0.00405361	0.259141		ZNF45-AS1	31.1386	-6.31075	2.21262	-2.85216	0.00434239	0.268939
VAPA	94.1221	1.23159	0.568533	2.16626	0.0302915	0.616678		KCNG2	592.771	-6.3075	1.75443	-3.59518	0.000324161	0.0533947
USP4	38.96	1.22755	0.55061	2.22944	0.0257847	0.583651		P4HA2-AS1	103.408	-6.30501	2.24639	-2.80673	0.00500474	0.285882
CCNB1	87.9757	1.20862	0.549182	2.20076	0.0277529	0.60141		PICART1	35.8696	-6.29875	2.71888	-2.31667	0.0205215	0.53803
CALR	601.826	1.20854	0.549756	2.19832	0.0279261	0.60141		FOXP2	5.63779	-6.28586	1.87269	-3.3566	0.000789075	0.0939808
PSMG2	45.6055	1.20742	0.615446	1.96186	0.0497785	0.742585		BTNL10	15.3032	-6.27625	2.08525	-3.00984	0.00261389	0.198995
CRTAP	83.398	1.20618	0.480664	2.5094	0.0120935	0.436136		H1-10-AS1	35.0415	-6.27595	2.288	-2.74298	0.00608845	0.319187
COL6A1	132.706	1.20009	0.577184	2.07922	0.037597	0.673913		HOXA-AS2	16.7406	-6.2755	2.67416	-2.34672	0.0189394	0.52897
CKAP4	85.1928	1.19764	0.491226	2.43807	0.0147658	0.475639		LOC105371903	5.81459	-6.19376	2.36076	-2.62363	0.00869976	0.372641
EHD2	58.8613	1.18783	0.497073	2.38964	0.0168648	0.504098		ADAMTS18	5.32137	-6.19192	1.94806	-3.1785	0.00148037	0.14387
SDF4	91.6164	1.18779	0.441087	2.69288	0.00708376	0.344185		LOC112268144	95.7126	-6.18898	2.58731	-2.39206	0.0167543	0.502087
BCAR3	59.4999	1.1788	0.553668	2.12907	0.0332484	0.644031		LOC105372588	5.42821	-6.18509	3.07871	-2.00899	0.0445381	0.715465
MSN	152.049	1.17707	0.39153	3.00633	0.00264418	0.198995		RPS12P29	5.40238	-6.18004	3.11871	-1.9816	0.0475242	0.731123
OXCT1	44.1092	1.16904	0.553305	2.11283	0.0346156	0.655289		LOC400627	28.3012	-6.17684	2.55727	-2.4154	0.0157178	0.489454
EHD1	49.474	1.1678	0.509344	2.29276	0.021862	0.548321		LOC105373975	38.7099	-6.12053	2.10911	-2.90195	0.00370848	0.247498
IRF2BPL	72.2931	1.16135	0.471498	2.4631	0.0137741	0.461621		PEX10	460.674	-6.08248	1.94459	-3.12789	0.00176064	0.160357
GDF15	177.133	1.15746	0.540857	2.14004	0.0323512	0.641089		THUMPD3-AS1	93.3373	-6.06687	2.91146	-2.08379	0.0371796	0.671459
LOC105379028	53.2074	1.15244	0.518565	2.22236	0.0262588	0.586405		LOC105376722	4.23189	-6.06432	2.45326	-2.47194	0.0134381	0.455951
RRBP1	612.753	1.14547	0.420878	2.72162	0.00649638	0.329541		SPATA31E1	4.25019	-6.06127	2.52198	-2.40337	0.0162447	0.494708
TWF1	64.7903	1.13302	0.4677	2.42253	0.0154127	0.484384		RNA5SP265	5.24417	-6.05665	2.66142	-2.27572	0.0228628	0.55629
LSG1	71.7782	1.1209	0.469883	2.38549	0.0170564	0.506963		LOC107985072	51.1541	-6.05533	0.913561	-6.62828	3.39627e-11	4.1515e-08
CLSPN	88.3545	1.11792	0.566755	1.97249	0.0485538	0.735729		B3GALNT1P1	5.10802	-6.02701	2.7718	-2.1744	0.0296751	0.614309
GOLGA3	130.505	1.10026	0.415915	2.64541	0.00815928	0.362331		LOC112268467	5.10802	-6.02701	2.7718	-2.1744	0.0296751	0.614309
ATL1	52.8604	1.09713	0.537043	2.0429	0.0410619	0.69036		RPL21P75	5.10802	-6.02701	2.7718	-2.1744	0.0296751	0.614309
CNDP2	49.3633	1.09158	0.504766	2.16254	0.0305769	0.619321		LOC101929614	59.3887	-6.00894	2.41553	-2.48763	0.0128599	0.44958
NR1D2	74.3449	1.09142	0.476332	2.2913	0.0219461	0.548652		R3HDML-AS1	3.9892	-5.96453	2.67934	-2.22612	0.0260062	0.58408
WARS1	74.8119	1.08626	0.466294	2.32955	0.0198298	0.536622		FAHD2CP	238.021	-5.93513	1.24658	-4.76111	1.92532e-06	0.00069868
STMN3	59.2012	1.0846	0.493252	2.19887	0.0278869	0.60141		HNF4G	4.54107	-5.92787	2.18831	-2.70888	0.00675108	0.334006
CMTM7	45.1954	1.08309	0.528392	2.04979	0.0403852	0.689159		DPEP1	37.7033	-5.92131	1.62348	-3.6473	0.000265014	0.0462779
G3BP1	307.23	1.081	0.383442	2.81919	0.00481453	0.280948		HMGN5	4.82455	-5.92068	2.33275	-2.53807	0.0111466	0.420238
AHR	110.943	1.08067	0.533595	2.02527	0.04284	0.703331		LOC105371516	4.05903	-5.90817	1.99116	-2.9672	0.00300523	0.216759
NFKBIA	52.4555	1.07931	0.470663	2.29318	0.0218378	0.548306		LOC102723692	33.2009	-5.90469	1.14057	-5.17698	2.25502e-07	9.18821e-05
EPHA2	132.126	1.07497	0.455603	2.35946	0.0183018	0.52654		LOC105369667	23.3293	-5.89503	2.8889	-2.04058	0.0412923	0.69143
NUDT6	52.4987	1.06733	0.505176	2.11278	0.0346196	0.655289		PSMG3-AS1	11.1668	-5.8818	2.8912	-2.03438	0.041913	0.696301
HSPA8	880.312	1.06598	0.361378	2.94976	0.00318026	0.225876		PTMAP5	210.148	-5.88054	1.90767	-3.08257	0.00205221	0.17523
GNAI2	106.263	1.06567	0.478945	2.22503	0.0260792	0.58408		LOC107985184	4.3129	-5.86526	2.42765	-2.41602	0.0156911	0.489454
COPE	66.8379	1.05979	0.540273	1.96159	0.0498107	0.742585		CSTA	3.66524	-5.86294	2.52618	-2.32088	0.0202935	0.536622
CTSC	67.1045	1.05449	0.523381	2.01476	0.04393	0.711138		ZNF254	3.63941	-5.85263	2.52036	-2.32214	0.0202255	0.536622
EIF5	117.269	1.05144	0.476793	2.20524	0.0274376	0.598908		LOC112268415	134.197	-5.85027	1.98798	-2.94282	0.00325235	0.228205
FAM98A	52.6277	1.04879	0.5276	1.98785	0.0468281	0.728092		LOC105371934	40.647	-5.83756	2.48952	-2.34485	0.0190345	0.52897
TMED10	104.644	1.04331	0.413115	2.52547	0.0115542	0.427392		LIMD2	66.709	-5.83389	2.16088	-2.69978	0.00693861	0.339977
PTPN1	75.5502	1.03787	0.516781	2.00834	0.0446068	0.715465		MALINC1	12.5268	-5.82773	2.81261	-2.072	0.0382652	0.674116
RAB12	55.99	1.03132	0.520542	1.98124	0.0475644	0.731123		FAM86LP	4.60014	-5.82397	2.34583	-2.48269	0.0130396	0.451111
HSP90B1	699.064	1.02347	0.502895	2.03516	0.0418349	0.696301		ZSCAN12	4.64427	-5.82251	2.28291	-2.55048	0.0107576	0.410929
RANGAP1	69.5262	1.02192	0.491937	2.07734	0.0377699	0.673913		LOC105378512	58.237	-5.82225	2.12293	-2.74255	0.00609638	0.319187
PWP1	83.8566	1.01647	0.509305	1.9958	0.0459557	0.721732		NEUROG2	4.55225	-5.81104	2.3828	-2.43875	0.0147382	0.475639
G6PD	77.5823	1.01327	0.499299	2.02938	0.0424192	0.698219		HIGD1A	4.50812	-5.77487	2.3369	-2.47116	0.0134675	0.455951
CHSY1	53.4916	1.00609	0.486843	2.06656	0.0387759	0.678034		NARF-AS2	21.7173	-5.77434	2.3451	-2.4623	0.0138049	0.461783
EFTUD2	104.417	1.00409	0.51182	1.9618	0.0497854	0.742585		LOC105373062	85.1546	-5.76749	1.68033	-3.43237	0.000598337	0.0816594
								HLA-DQA2	4.30202	-5.73774	2.5526	-2.2478	0.0245887	0.576471
								LOC105371475	4.39404	-5.73547	2.3911	-2.39867	0.0164547	0.496311
								C4orf51	172.096	-5.71983	1.82757	-3.12974	0.0017496	0.160357
								TECTB	3.31922	-5.71935	2.59604	-2.20311	0.0275872	0.601044
								LOC105378410	9.95238	-5.70437	2.89083	-1.97326	0.0484655	0.735729
								YPEL1	145.743	-5.69822	1.68418	-3.38337	0.000716009	0.0879858
								NBEAP2	10.3167	-5.6952	2.37425	-2.39874	0.0164515	0.496311
								F8A1	4.25789	-5.68988	2.4663	-2.30706	0.0210517	0.54446
								DPY19L1P1	43.7276	-5.67674	2.12045	-2.67714	0.00742529	0.347309
								HOXC11	3.18307	-5.66165	2.6089	-2.17013	0.0299971	0.615443
								LOC105379393	4.12174	-5.65742	2.59556	-2.17966	0.029283	0.614309
								PARD3B	3.16101	-5.65387	2.59713	-2.17697	0.0294826	0.614309
								RPL13AP5	4.14381	-5.65198	2.53997	-2.22522	0.0260665	0.58408
								RPS12P28	4.14381	-5.65198	2.53997	-2.22522	0.0260665	0.58408
								PDE4DIPP6	24.9552	-5.65121	2.35288	-2.40182	0.0163136	0.494708
								CDKN2B-AS1	10.1511	-5.63166	2.09971	-2.68211	0.00731591	0.346915
								LOC100506281	4.02972	-5.62665	2.66605	-2.11048	0.0348167	0.655814
								YWHAQP6	4.02972	-5.62665	2.66605	-2.11048	0.0348167	0.655814
								HEATR5A-DT	4.00766	-5.61465	2.66466	-2.10708	0.0351108	0.659214
								ZNF573	3.40035	-5.61296	2.08787	-2.68837	0.00718026	0.345406
								NANOGP6	3.89357	-5.58285	2.78427	-2.00514	0.0449484	0.715765
								MMP23B	19.2664	-5.57631	2.10296	-2.65165	0.00800995	0.357284
								LOC105373428	29.8424	-5.57443	1.33062	-4.18935	2.79757e-05	0.00721928
								LOC107984338	142.676	-5.55398	2.04052	-2.72184	0.00649193	0.329541
								PTMAP11	9.05812	-5.54341	2.70515	-2.04921	0.0404419	0.689195
								LOC105371289	8.82995	-5.50997	2.79757	-1.96956	0.0488893	0.736556
								ORAI2	71.7535	-5.50613	2.15695	-2.55273	0.0106881	0.410419
								RPL9P8	48.195	-5.46472	2.51309	-2.1745	0.0296674	0.614309
								ZNF675	2.75256	-5.46198	2.65647	-2.05611	0.0397722	0.683722
								LOC101059906	15.5033	-5.461	2.19042	-2.49313	0.0126623	0.447921
								LOC101929609	34.8932	-5.45187	1.81056	-3.01115	0.00260264	0.198995
								CA14	788.322	-5.45107	1.63861	-3.32665	0.000878969	0.100562
								GPM6A	3.54391	-5.43045	2.22924	-2.43601	0.0148503	0.476086
								PTOV1-AS1	265.003	-5.42752	1.74184	-3.11597	0.00183339	0.164993
								FAM86C2P	3.45189	-5.391	2.29581	-2.34819	0.0188648	0.528894
								PACRG	2.57229	-5.36743	2.70269	-1.98596	0.0470379	0.72879
								BLOC1S3	3.40776	-5.36088	2.28861	-2.34242	0.0191593	0.52897
								NSA2P1	3.40776	-5.36088	2.28861	-2.34242	0.0191593	0.52897
								TSPEAR-AS1	16.4511	-5.35153	2.39548	-2.23401	0.0254823	0.581763
								ZFP14	2.92195	-5.3477	2.15498	-2.48156	0.0130809	0.451418
								ZNF287	8.52442	-5.34473	2.13111	-2.50795	0.0121434	0.437255
								LOC105373424	34.9542	-5.34111	2.15853	-2.47442	0.0133454	0.455951
								FSTL4	35.2174	-5.33206	1.20998	-4.40674	1.04938e-05	0.00297218
								ITGAL	6.69873	-5.3278	2.018	-2.64014	0.00828712	0.364603
								LOC105375724	9.1558	-5.32762	2.36516	-2.25254	0.024288	0.575483
								SLC25A29	461.457	-5.32682	1.87185	-2.84576	0.0044306	0.269626
								LOC105371701	8.18216	-5.32219	2.32523	-2.28889	0.0220857	0.550366
								GRIN3B	251.789	-5.31542	1.51773	-3.50221	0.000461415	0.068257
								NORAD	47.0212	-5.30963	2.48101	-2.14011	0.0323459	0.641089
								RPS10P13	31.2793	-5.30429	2.32386	-2.28254	0.0224577	0.553166
								LINC00861	18.1789	-5.30394	1.76252	-3.00929	0.00261861	0.198995
								MMP19	52.3529	-5.30247	1.67419	-3.16719	0.00153921	0.14721
								TMEM184A	308.921	-5.29834	1.83378	-2.88929	0.00386111	0.252323
								LOC105375061	3.29368	-5.29512	2.33126	-2.27136	0.0231252	0.558542
								ERICH6	8.11597	-5.28661	2.25715	-2.34216	0.0191726	0.52897
								NRIP1	43.9106	-5.2827	1.97026	-2.68122	0.00733551	0.346915
								LOC285847	8.02395	-5.27512	2.29623	-2.29729	0.021602	0.547752
								PRANCR	3.20165	-5.25816	2.42202	-2.17098	0.0299328	0.615212
								LOC105376327	8.73617	-5.25221	2.13336	-2.46194	0.0138187	0.461783
								LAMA4	6.31235	-5.2458	2.02441	-2.59127	0.0095622	0.391982
								RAD9B	283.653	-5.22982	1.84229	-2.83876	0.00452888	0.2706
								MLXP1	29.8772	-5.21641	1.82873	-2.85247	0.00433805	0.268939
								LOC107986633	7.40547	-5.19468	1.7224	-3.01596	0.00256169	0.198981
								FHAD1-AS1	33.0365	-5.1863	0.871198	-5.95307	2.63159e-09	1.52797e-06
								MGC16275	40.8945	-5.18567	1.84737	-2.80705	0.0049997	0.285882
								KRT8P40	3.06551	-5.17239	2.47372	-2.09094	0.0365336	0.66758
								LOC105377321	3.04344	-5.15469	2.47079	-2.08626	0.0369555	0.669773
								FAM219B	76.0448	-5.15436	1.61075	-3.19997	0.00137441	0.138185
								LOC112268267	24.0927	-5.10565	1.85068	-2.7588	0.00580134	0.313024
								LOC107984213	2.53557	-5.09566	2.28503	-2.23002	0.0257463	0.583651
								HSPD1P12	2.92936	-5.08899	2.55131	-1.99466	0.0460803	0.721732
								MPO	2.92936	-5.08899	2.55131	-1.99466	0.0460803	0.721732
								RBBP8NL	2.92936	-5.08899	2.55131	-1.99466	0.0460803	0.721732
								RN7SL268P	2.92936	-5.08899	2.55131	-1.99466	0.0460803	0.721732
								TREH	199.155	-5.08197	1.52277	-3.33732	0.000845899	0.0972574
								LRP1B	6.22598	-5.07733	2.06897	-2.45404	0.0141262	0.465362
								SNORA104	7.20878	-5.06592	1.74361	-2.90541	0.00366769	0.246897
								SPDYE2B	55.1966	-5.05355	1.66089	-3.04268	0.00234484	0.189094
								CD63-AS1	24.2593	-5.02963	1.95888	-2.56761	0.0102402	0.405456
								POM121L10P	7.59169	-5.01393	2.05017	-2.44562	0.0144605	0.47102
								ATP2C2-AS1	195.596	-5.01325	0.900502	-5.56717	2.58909e-08	1.15638e-05
								LOC107986997	35.6309	-5.0104	1.99143	-2.51599	0.01187	0.432101
								LOC105377286	2.39565	-4.9948	2.42026	-2.06375	0.0390418	0.678702
								AMN	770.353	-4.99376	1.57902	-3.16257	0.00156382	0.147641
								MIEN1	85.3597	-4.9868	1.83235	-2.72153	0.0064981	0.329541
								LOC105371100	6.84622	-4.97128	1.92283	-2.5854	0.00972655	0.396314
								LOC439933	2.37359	-4.96726	2.34062	-2.1222	0.0338213	0.648553
								RPL9	120.484	-4.96579	1.79074	-2.77304	0.00555352	0.303483
								LOC105371414	18.3808	-4.96486	1.88318	-2.63642	0.00837862	0.365777
								LINC00174	12.8078	-4.9621	2.37526	-2.08907	0.036701	0.667643
								DEGS2	64.0555	-4.9583	1.58626	-3.12578	0.00177335	0.160883
								LOC112268060	37.0938	-4.94791	0.886447	-5.58173	2.38131e-08	1.08443e-05
								C10orf95-AS1	24.8574	-4.93171	1.81084	-2.72344	0.00646069	0.329541
								CD19	21.9746	-4.93145	1.12511	-4.38306	1.17022e-05	0.00323552
								SCARA3	525.75	-4.92726	1.73802	-2.83498	0.00458286	0.272217
								C1orf56	111.904	-4.9172	1.77905	-2.76395	0.00571062	0.309881
								GAPDHP2	2.28534	-4.90657	2.40037	-2.04409	0.0409451	0.690094
								TTC23L	27.3114	-4.90498	1.82614	-2.68599	0.00723153	0.346263
								ARRDC1-AS1	19.2183	-4.89484	2.04203	-2.39705	0.0165277	0.496581
								RNF24	112.086	-4.89089	1.9224	-2.54416	0.0109542	0.415706
								LURAP1	18.0384	-4.88324	1.42576	-3.42501	0.000614776	0.0816594
								LOC112268155	495.517	-4.8775	1.77913	-2.74151	0.00611574	0.319187
								ZNF567	11.7972	-4.85913	1.37208	-3.54143	0.000397959	0.0628749
								NUTM2A-AS1	10.4394	-4.85198	2.27338	-2.13426	0.0328214	0.641572
								CA12	2.23744	-4.85189	2.36775	-2.04915	0.040447	0.689195
								GYG1	563.755	-4.84894	1.67167	-2.90065	0.00372387	0.247813
								GAPDHP60	6.74897	-4.83177	2.37926	-2.03079	0.0422768	0.697357
								RNFT1-DT	6.74897	-4.83177	2.37926	-2.03079	0.0422768	0.697357
								RSPH1	2.21538	-4.82853	2.34204	-2.06167	0.0392387	0.680597
								VIL1	169.519	-4.82495	1.96092	-2.46056	0.0138722	0.462246
								LOC105372426	401.035	-4.81007	1.6159	-2.97672	0.00291351	0.212787
								CAMK4	117.241	-4.80941	1.84652	-2.60457	0.00919892	0.386338
								LOC102725180	11.8436	-4.80545	2.06795	-2.32378	0.0201373	0.536622
								CNN2P1	6.61282	-4.79759	2.43121	-1.97334	0.0484574	0.735729
								MTERF2	287.571	-4.79598	1.86322	-2.57402	0.0100524	0.401835
								LOC112268199	23.114	-4.79493	2.13648	-2.24431	0.0248126	0.577428
								LOC107986696	50.816	-4.78744	1.89839	-2.52184	0.0116742	0.42833
								TACR3	9.64251	-4.78206	1.41435	-3.38111	0.000721941	0.0882477
								NUDT17	194.24	-4.74248	1.49102	-3.1807	0.0014692	0.14387
								LOC105371755	80.9648	-4.74008	1.25488	-3.77731	0.000158531	0.0317403
								GRTP1	626.055	-4.73906	1.69036	-2.80358	0.0050539	0.285882
								PLA2G4D	2.10129	-4.72632	2.40636	-1.9641	0.0495188	0.742463
								DTX1	56.6459	-4.72051	1.59177	-2.96556	0.00302128	0.217242
								TIGIT	239.699	-4.66343	1.54593	-3.01659	0.00255639	0.198981
								SERTAD3-AS1	101.337	-4.64749	1.74387	-2.66505	0.00769766	0.353317
								MMP25-AS1	13.3112	-4.642	2.05136	-2.26289	0.0236424	0.564912
								MCTP2	10.2553	-4.62914	1.89402	-2.44409	0.014522	0.471711
								ARSD-AS1	119.51	-4.62601	1.47671	-3.13264	0.00173243	0.160301
								MMP9	8.60457	-4.62486	1.62682	-2.84288	0.00447082	0.269904
								FRMD4B	4.43198	-4.61914	1.80617	-2.55742	0.0105452	0.408115
								PPP1R14B-AS1	91.5375	-4.61522	1.76651	-2.61262	0.00898517	0.379652
								AKTIP	172.141	-4.61416	1.57783	-2.92437	0.00345157	0.237871
								LYSMD4	158.419	-4.61227	1.64506	-2.8037	0.00505194	0.285882
								SLC19A1	611.571	-4.56002	1.64133	-2.77825	0.00546533	0.300787
								MARCKSL1P1	5.17544	-4.55303	2.0421	-2.22958	0.0257755	0.583651
								ALG1L12P	25.0594	-4.54875	1.38134	-3.29301	0.000991227	0.107908
								ZNF710-AS1	51.7386	-4.5348	1.91056	-2.37354	0.0176184	0.513558
								TMOD1	157.14	-4.52783	1.803	-2.51127	0.0120296	0.43524
								ESRRA	332.234	-4.5255	1.65577	-2.73317	0.00627286	0.325922
								LOC105371036	19.2425	-4.52345	2.24969	-2.0107	0.044357	0.714418
								RPAIN	423.861	-4.49984	1.72949	-2.60183	0.00927291	0.387822
								TRMT112	288.775	-4.49901	1.60538	-2.80246	0.00507141	0.285882
								AADACL2	9.27643	-4.48602	1.89991	-2.36118	0.0182169	0.526229
								NKX6-1	4.53518	-4.45988	1.96816	-2.26602	0.0234504	0.563614
								SAMD14	624.037	-4.44103	1.55409	-2.85763	0.00426816	0.268939
								FUZ	409.892	-4.4381	1.56487	-2.83608	0.00456704	0.271973
								SSC4D	147.853	-4.43046	0.627084	-7.06517	1.60416e-12	2.32854e-09
								NEPNP	31.3425	-4.42535	1.881	-2.35267	0.0186394	0.526888
								KPNB1-DT	1524.95	-4.41628	1.44925	-3.04728	0.00230924	0.186871
								SLC25A18	155.757	-4.41378	1.68364	-2.62157	0.00875265	0.372991
								TMEM139-AS1	9.07225	-4.39564	1.39264	-3.15635	0.00159759	0.150172
								PSMA3-AS1	9.23439	-4.39458	2.07241	-2.12052	0.0339623	0.650267
								ZSCAN12P1	20.9919	-4.38119	2.08487	-2.10143	0.0356036	0.660056
								PCDHG@	14.4902	-4.3807	2.09792	-2.08812	0.0367873	0.667643
								CIITA	375.85	-4.37296	1.6104	-2.71545	0.00661867	0.332006
								LOC105372235	8.89022	-4.35718	1.425	-3.05767	0.00223066	0.18242
								ORM2	3.33162	-4.35378	2.15218	-2.02296	0.0430772	0.705159
								ANKRD9	13.7311	-4.34048	1.60452	-2.70516	0.00682709	0.335931
								ZNF585B	7.01869	-4.33302	1.67721	-2.58347	0.00978131	0.397152
								ZAR1	178.753	-4.32843	1.59361	-2.71611	0.00660544	0.332006
								PHC1	434.859	-4.32782	1.61165	-2.68533	0.0072458	0.346263
								NMNAT2	4.95669	-4.32599	2.08307	-2.07674	0.0378257	0.673913
								GPLD1	295.171	-4.32362	1.53174	-2.82269	0.00476225	0.280008
								LOC105371622	118.231	-4.31896	1.38053	-3.12849	0.0017571	0.160357
								RAD9A	830.897	-4.30833	1.59024	-2.70923	0.0067439	0.334006
								TNNI1	59.2357	-4.30242	1.3553	-3.17451	0.00150092	0.144643
								CDPF1P1	8.90679	-4.28721	1.7581	-2.43855	0.0147463	0.475639
								LOC101928120	646.052	-4.27468	1.46745	-2.91299	0.00357986	0.244661
								SNX20	4.44881	-4.27051	1.8766	-2.27567	0.0228658	0.55629
								ATG7	407.789	-4.26787	1.69066	-2.52438	0.0115901	0.427392
								HOXA3	45.2444	-4.2577	1.69196	-2.51643	0.0118551	0.432101
								LYRM2	28.712	-4.25153	1.61402	-2.63412	0.00843563	0.367575
								ALG1L11P	36.2387	-4.24035	1.40171	-3.02513	0.00248522	0.196994
								LOC105377920	199.216	-4.23469	1.70724	-2.48043	0.0131224	0.45173
								ID2	28.9768	-4.22599	0.947336	-4.46091	8.16111e-06	0.00236927
								NRSN2	8.50923	-4.22446	1.62492	-2.59979	0.00932816	0.388439
								HOXA10	291.047	-4.21929	1.46414	-2.88174	0.00395483	0.255852
								PSMC3IP	285.131	-4.21478	1.53363	-2.74823	0.00599174	0.316989
								SLC12A5-AS1	16.3249	-4.21418	1.1353	-3.71194	0.000205678	0.0388364
								CRB2	150.994	-4.21251	1.5754	-2.67393	0.00749675	0.348907
								SLC5A5	8.42839	-4.2093	1.88384	-2.23443	0.0254547	0.581763
								ZCWPW1	176.365	-4.2061	1.69327	-2.48401	0.0129913	0.451111
								SUMO1	56.361	-4.1952	1.68713	-2.48659	0.0128976	0.449769
								EMILIN3	46.3413	-4.1874	1.44177	-2.90435	0.00368019	0.246897
								RPL3P4	40.5104	-4.18732	1.59668	-2.62251	0.00872838	0.372641
								PDZD7	163.894	-4.18446	1.67958	-2.49138	0.0127248	0.448732
								PABIR3	57.1975	-4.18213	1.6598	-2.51967	0.0117466	0.429792
								AGK	498.692	-4.15378	1.54793	-2.68344	0.00728694	0.346802
								PIK3CD	228.071	-4.1532	1.66234	-2.49841	0.0124753	0.444384
								MAPK10	7.02425	-4.15004	2.06743	-2.00735	0.0447128	0.715765
								FARP1	1472.04	-4.14935	1.52638	-2.71844	0.00655912	0.331164
								SMIM15-AS1	58.5115	-4.1443	1.70216	-2.43474	0.0149027	0.476086
								FPR3	7.42554	-4.13439	1.46426	-2.82353	0.00474977	0.279983
								SLC15A3	159.228	-4.12666	1.47058	-2.80614	0.00501387	0.285882
								RAB4A-AS1	185.144	-4.12072	1.4486	-2.84463	0.00444636	0.269626
								ERFL	12.0345	-4.11802	1.62507	-2.53406	0.0112749	0.421673
								RBFOX3	17.8775	-4.11534	1.66084	-2.47786	0.0132174	0.454103
								LOC105370687	97.4005	-4.11424	1.6588	-2.48025	0.0131289	0.45173
								BRF2	150.706	-4.11362	1.78873	-2.29975	0.0214624	0.547752
								PTMAP2	36.773	-4.10665	1.83978	-2.23215	0.0256051	0.582817
								ETFDH	205.879	-4.10187	1.34149	-3.0577	0.00223042	0.18242
								ZNF613	3.29491	-4.09744	1.89461	-2.16268	0.0305656	0.619321
								ZNF596	24.944	-4.09648	1.14085	-3.59074	0.000329744	0.0539317
								ALG1L7P	109.178	-4.08239	1.36861	-2.98287	0.00285558	0.211213
								SNHG16	17.0127	-4.05894	1.88216	-2.15653	0.0310424	0.625832
								BOK-AS1	120.345	-4.05556	1.52371	-2.66163	0.00777625	0.35482
								LOC112268251	42.1231	-4.05439	1.59554	-2.54107	0.0110514	0.418709
								CDKL1	97.7762	-4.05403	1.49808	-2.70615	0.00680678	0.335642
								LOC100130027	62.8958	-4.04632	1.70176	-2.37773	0.0174195	0.511463
								RNF157-AS1	13.5021	-4.04123	1.54694	-2.61241	0.00899068	0.379652
								RFFL	104.177	-4.03405	1.56821	-2.5724	0.0100997	0.403034
								PIP4P1	203.694	-4.03122	1.63102	-2.47159	0.0134513	0.455951
								EPM2A-DT	46.32	-4.02382	1.71784	-2.34237	0.0191618	0.52897
								LMOD1	25.3602	-4.00642	1.36623	-2.93247	0.00336274	0.233831
								B9D1	530.494	-4.00508	1.40937	-2.84176	0.00448654	0.269904
								SLAMF8	26.3755	-3.99582	1.87583	-2.13016	0.033158	0.643671
								NPM1	268.816	-3.99472	1.55786	-2.56423	0.0103404	0.405456
								HAPLN2	11.015	-3.99164	1.41284	-2.82526	0.00472423	0.279186
								LOC112268430	44.3114	-3.98614	0.844682	-4.7191	2.36889e-06	0.000833599
								CD2BP2-DT	22.5817	-3.98431	1.78106	-2.23704	0.0252839	0.580886
								EME1	546.658	-3.98019	1.64255	-2.42318	0.0153855	0.484384
								HLA-F-AS1	10.1299	-3.96768	1.71166	-2.31804	0.0204474	0.53803
								LOC285442	6.3544	-3.96722	1.9126	-2.07425	0.0380562	0.673913
								ATG4D	117.074	-3.96561	1.59414	-2.48761	0.0128604	0.44958
								GGACT	104.992	-3.93186	1.3752	-2.85912	0.00424812	0.268836
								ENTPD1	327.233	-3.9302	1.45947	-2.69289	0.00708352	0.344185
								LOC105378954	31.5874	-3.91668	1.44198	-2.71618	0.00660403	0.332006
								PTGDR2	110.292	-3.90857	1.81054	-2.15878	0.0308671	0.62284
								GABPB1	237.755	-3.90318	1.58819	-2.45763	0.0139857	0.462883
								ANKRD53	175.785	-3.90193	1.37464	-2.83852	0.00453233	0.2706
								EIF3CL	25.9921	-3.89201	1.88685	-2.0627	0.0391409	0.67959
								FZD5	110.989	-3.89002	1.86019	-2.09119	0.036511	0.66758
								SLC29A4	73.5347	-3.88971	1.54126	-2.52373	0.0116118	0.427392
								HPCA	94.1736	-3.85808	1.46707	-2.62979	0.00854386	0.368831
								ZDHHC6	1901.01	-3.85223	0.453374	-8.4968	1.94882e-17	9.05227e-14
								HLCS	162.833	-3.84484	1.53439	-2.50578	0.0122182	0.438853
								PRSS55	8.04307	-3.84046	1.21405	-3.16333	0.00155973	0.147641
								ODAD2	20.1164	-3.81824	1.07736	-3.54408	0.00039399	0.0626741
								HAS1	5.82471	-3.81804	1.58476	-2.40923	0.0159864	0.493072
								BRICD5	102.539	-3.81133	1.49402	-2.55106	0.0107397	0.410921
								RPL7P9	68.5426	-3.809	1.6414	-2.32058	0.0203096	0.536622
								PFN1P6	9.20238	-3.79033	1.40508	-2.69758	0.00698445	0.340785
								RGMB-AS1	12.47	-3.78927	1.31173	-2.88876	0.00386769	0.252323
								IGK	116.125	-3.78679	1.78868	-2.11709	0.0342523	0.653128
								NAPEPLD	45.584	-3.78026	1.53363	-2.4649	0.0137051	0.459971
								B3GNT9	66.324	-3.77836	1.43197	-2.63857	0.00832571	0.365191
								ERN2	49.7515	-3.77429	1.51264	-2.49517	0.0125897	0.447088
								LOC100128770	153.271	-3.77151	0.828012	-4.55491	5.24092e-06	0.0016674
								CHD1-DT	6.41171	-3.75708	1.78416	-2.10579	0.0352224	0.660056
								LOC105377116	6.49996	-3.74853	1.69781	-2.20786	0.0272539	0.59658
								KLRK1-AS1	28.5954	-3.74779	1.25871	-2.97749	0.00290623	0.212787
								TSPAN18	79.1367	-3.74467	1.27122	-2.94572	0.00322202	0.226762
								ICA1	59.7447	-3.74373	1.34844	-2.77634	0.00549747	0.301841
								ASPRV1	27.671	-3.73936	1.87185	-1.99769	0.0457507	0.721732
								KRT18P63	5.59453	-3.72912	1.45277	-2.5669	0.0102613	0.405456
								ACSL5	240.978	-3.72805	0.751169	-4.963	6.9413e-07	0.000268686
								LOC107985504	54.6159	-3.72507	1.45393	-2.56208	0.0104048	0.405456
								ABCC2	212.374	-3.72209	1.20622	-3.08574	0.00203046	0.17523
								SLC26A5	47.1894	-3.70487	1.78224	-2.07878	0.0376377	0.673913
								METTL21C	21.2701	-3.68607	1.61667	-2.28003	0.0226056	0.553166
								ALG1L8P	209.605	-3.68422	1.26752	-2.90663	0.00365345	0.246897
								LOC105376860	439.735	-3.68154	1.5197	-2.42255	0.0154121	0.484384
								EEF1DP2	92.3862	-3.65118	1.48979	-2.4508	0.014254	0.467583
								MAP4K1	17.0398	-3.64902	1.09288	-3.3389	0.000841105	0.0971873
								PIH1D2	520.176	-3.64606	1.48333	-2.45802	0.0139707	0.462883
								CHRNE	174.259	-3.64502	1.02232	-3.56543	0.000363261	0.0581844
								TLCD1	380.172	-3.63604	1.40063	-2.59601	0.00943137	0.390482
								CORO6	81.486	-3.62351	1.74956	-2.0711	0.0383495	0.674116
								ZNF391	8.87695	-3.62342	1.77731	-2.03871	0.0414792	0.69306
								KLK7	4.61202	-3.6018	1.51006	-2.3852	0.0170698	0.506963
								TMEM132B	8.10202	-3.60044	1.35236	-2.66233	0.0077601	0.35478
								B3GNTL1	310.693	-3.60036	1.33965	-2.68754	0.00719812	0.345406
								LOC102723704	509.152	-3.59757	1.36793	-2.62994	0.00854006	0.368831
								TMEM51-AS1	21.8188	-3.59715	1.68524	-2.1345	0.0328015	0.641572
								DPYSL3	10.5453	-3.59309	1.51194	-2.37647	0.017479	0.511917
								LOC100506071	96.6953	-3.58004	0.518592	-6.90337	5.07815e-12	6.93764e-09
								RPL13A	230.315	-3.57742	1.46308	-2.44512	0.0144805	0.47102
								TFAP2E-AS1	22.037	-3.56468	1.69728	-2.10022	0.0357091	0.660832
								BICDL2	56.9154	-3.56349	1.36984	-2.6014	0.00928434	0.387822
								ZDHHC2	943.026	-3.55939	1.40731	-2.52921	0.0114318	0.425487
								PLTP	294.443	-3.55905	1.53089	-2.32483	0.020081	0.536622
								AREG	232.659	-3.55698	0.402128	-8.84539	9.12087e-19	5.29581e-15
								SSBP3-AS1	10.4865	-3.54736	1.50728	-2.35348	0.0185988	0.526888
								PTGES3	154.834	-3.53764	1.6573	-2.13458	0.0327954	0.641572
								VASH1	201.652	-3.53159	1.41667	-2.49288	0.012671	0.447921
								MRPS18C	181.633	-3.51927	1.2658	-2.78028	0.00543123	0.299621
								FAM90A1	6.18448	-3.51842	1.34728	-2.61151	0.00901444	0.379964
								LOC107984754	47.5739	-3.51655	1.54248	-2.2798	0.0226193	0.553166
								METTL7AP1	3.968	-3.51439	1.77819	-1.97638	0.0481116	0.734644
								MTX1P1	155.617	-3.51398	1.42463	-2.46659	0.0136406	0.458469
								LOC105370091	13.1874	-3.50821	1.58166	-2.21806	0.0265508	0.590653
								LOC441242	20.5565	-3.49885	1.67377	-2.09041	0.036581	0.667643
								LOC105372281	194.745	-3.48893	1.44652	-2.41195	0.0158674	0.491124
								PBX1	10.85	-3.48815	1.04213	-3.34714	0.000816494	0.0957731
								ARRDC4	4.77588	-3.47701	1.62925	-2.13412	0.0328328	0.641572
								SLC66A3	155.444	-3.47657	1.57509	-2.20722	0.027299	0.596937
								EFHD2-AS1	8.14468	-3.474	1.62632	-2.13611	0.0326701	0.641572
								GCFC2	375.756	-3.47196	1.49269	-2.32598	0.0200198	0.536622
								C2orf92	65.9011	-3.46551	1.41208	-2.45418	0.0141205	0.465362
								TMEM130	4.26977	-3.46437	1.50896	-2.29587	0.0216835	0.547752
								LOC105372442	145.514	-3.45255	1.27273	-2.7127	0.0066737	0.3329
								JOSD1	1264.1	-3.45128	1.48937	-2.31727	0.0204889	0.53803
								LOC122539212	22.8093	-3.45012	1.578	-2.18639	0.0287871	0.612253
								ARMC7	87.8493	-3.44799	1.56861	-2.19812	0.0279406	0.60141
								LOC107984352	7.9348	-3.44183	1.72553	-1.99466	0.0460805	0.721732
								CSAD	45.6252	-3.43751	1.36038	-2.52688	0.0115082	0.426962
								IFT22	124.334	-3.43535	1.45844	-2.3555	0.0184978	0.526888
								FEZF1-AS1	5.47226	-3.43514	1.52223	-2.25665	0.0240297	0.570644
								YPEL3-DT	7.39746	-3.43508	1.2884	-2.66616	0.00767223	0.352847
								LOC112268148	91.9754	-3.43504	1.38214	-2.4853	0.0129443	0.450722
								ADIRF-AS1	6854.63	-3.43266	1.27614	-2.68988	0.00714781	0.345131
								FAXDC2	625.223	-3.43119	1.42723	-2.40409	0.0162129	0.494708
								GPR62	13.9998	-3.42917	1.2587	-2.72437	0.00644252	0.329541
								CENATAC	1351.51	-3.42478	1.33618	-2.5631	0.0103742	0.405456
								LOC105373024	20.0348	-3.42449	1.46909	-2.33103	0.0197519	0.536622
								WDR64	42.9523	-3.41766	0.761249	-4.48954	7.13762e-06	0.00213132
								MIF4GD	129.276	-3.40985	1.33582	-2.55263	0.0106912	0.410419
								TECPR1	74.4374	-3.40607	1.60966	-2.11601	0.0343438	0.653452
								COG5	249.861	-3.40596	1.48187	-2.29842	0.0215378	0.547752
								SIRT3	65.3134	-3.39764	1.7188	-1.97675	0.0480701	0.734491
								DPH5	297.888	-3.39551	1.46895	-2.31152	0.020804	0.541673
								MPP7	87.4646	-3.39417	0.727034	-4.66851	3.03392e-06	0.00105168
								ORMDL2	320.814	-3.3897	1.53163	-2.21313	0.0268885	0.595789
								PACSIN1	6.29144	-3.38783	1.30069	-2.60463	0.00919725	0.386338
								FOXH1	207.464	-3.38221	1.30899	-2.58384	0.00977063	0.397152
								SLC22A18	47.6703	-3.38162	1.21369	-2.78622	0.00533262	0.296292
								ITGB1BP1	249.207	-3.38043	1.52677	-2.21411	0.0268211	0.595527
								PDK4	5.03729	-3.3793	1.6667	-2.02754	0.0426073	0.700321
								SLC22A18AS	238.221	-3.37397	1.47569	-2.28637	0.0222327	0.552843
								PLA2G10	5.25162	-3.37382	1.54531	-2.18326	0.0290167	0.613683
								ACOT13	186.416	-3.37299	1.52751	-2.20817	0.0272327	0.59658
								ZBTB46	67.7145	-3.37078	1.61924	-2.0817	0.0373695	0.672274
								LOC101929439	20.1473	-3.36347	1.42563	-2.35928	0.0183103	0.52654
								DGAT1	322.691	-3.36128	1.21811	-2.75943	0.00579026	0.313024
								TNFRSF25	255.73	-3.35965	1.1394	-2.94861	0.00319211	0.226027
								LOC102723340	1028.86	-3.3584	1.20259	-2.79264	0.005228	0.293286
								BBIP1	148.86	-3.35766	1.44337	-2.32627	0.0200044	0.536622
								LOC105375431	229.079	-3.35495	1.31814	-2.54522	0.010921	0.415124
								LOC440792	12.0758	-3.35338	1.34822	-2.48727	0.0128728	0.44958
								NR2C2AP	311.154	-3.35313	1.52126	-2.20418	0.0275116	0.59996
								FBXO44	474.144	-3.35175	1.59432	-2.1023	0.0355266	0.660056
								CICP14	104.51	-3.34892	1.36589	-2.45181	0.0142138	0.467583
								HNF1A	38.7223	-3.34703	1.38903	-2.40962	0.0159693	0.493072
								NPM1P27	17.9379	-3.34569	1.69661	-1.97198	0.0486116	0.735729
								SSPN	7.7786	-3.33845	1.62493	-2.05452	0.039925	0.685607
								SHBG	256.376	-3.33046	1.35973	-2.44935	0.0143114	0.468803
								CFAP73	1667.84	-3.32791	1.41467	-2.35243	0.0186511	0.526888
								INSL3	36.8624	-3.31756	1.28576	-2.58024	0.00987331	0.39949
								LOC100652768	273.509	-3.31675	1.2801	-2.59101	0.00956959	0.391982
								HLA-DPA1	6.96494	-3.30633	1.50522	-2.19657	0.0280511	0.603229
								SPATA1	443.667	-3.30481	1.20347	-2.74606	0.00603161	0.318373
								TPSG1	48.5037	-3.30423	1.28941	-2.56258	0.0103896	0.405456
								SAT1	599.016	-3.30342	0.361138	-9.14727	5.83926e-20	4.52056e-16
								KLHL32	52.8706	-3.30188	1.55084	-2.12909	0.0332471	0.644031
								IL18BP	72.8214	-3.29374	1.38198	-2.38336	0.0171555	0.50821
								NME7	93.4497	-3.29191	1.43313	-2.29701	0.0216181	0.547752
								KMO	57.5907	-3.28769	1.03909	-3.164	0.00155617	0.147641
								SLC7A6OS	270.806	-3.28711	1.32352	-2.48362	0.0130054	0.451111
								ZNF333	79.255	-3.28012	1.44476	-2.27035	0.0231861	0.559187
								TP53I11	29.3638	-3.27754	1.36464	-2.40176	0.0163163	0.494708
								LOC105370573	15.7285	-3.27655	1.60424	-2.04242	0.0411095	0.69036
								PPIL6	89.2702	-3.27601	1.49342	-2.19364	0.0282615	0.60607
								LOC105371129	89.1508	-3.27581	1.51223	-2.1662	0.0302956	0.616678
								RPL18AP3	33.0596	-3.26806	1.45828	-2.24104	0.0250234	0.580826
								PRR19	1234.06	-3.26289	1.40528	-2.32188	0.0202393	0.536622
								IQCK	82.533	-3.25219	1.37123	-2.37173	0.0177049	0.513994
								MMP24	292.842	-3.24915	1.13962	-2.85108	0.00435715	0.268946
								FAM161B	108.481	-3.24445	1.51283	-2.14462	0.0319835	0.637527
								LGALS8-AS1	10.727	-3.23825	1.51269	-2.14073	0.0322962	0.641089
								ZNF608	22.8546	-3.23276	1.07915	-2.99566	0.00273854	0.20451
								MTIF2	1258.85	-3.23094	1.3228	-2.4425	0.014586	0.472519
								HDAC7	111.2	-3.22883	0.966357	-3.34124	0.000834041	0.0971096
								ZNF385C	22.3636	-3.22854	1.45067	-2.22556	0.0260439	0.58408
								TMEM198B	13.4078	-3.22373	1.57471	-2.04719	0.0406393	0.689195
								MRPL20-AS1	253.78	-3.22219	1.43791	-2.24088	0.0250337	0.580826
								COQ5	94.6157	-3.21999	1.40215	-2.29647	0.0216491	0.547752
								KIF26A-DT	4.39126	-3.21556	1.57517	-2.0414	0.0412109	0.691063
								TSTD2	114.49	-3.21153	1.37258	-2.33978	0.019295	0.529064
								SASS6	110.645	-3.20282	1.53311	-2.0891	0.0366989	0.667643
								SLURP1	6.60734	-3.2018	1.42595	-2.24537	0.0247441	0.577133
								HMGB3P24	34.353	-3.19578	1.62798	-1.96303	0.0496428	0.742585
								MORF4L2-AS1	32.7803	-3.18471	1.49687	-2.12758	0.0333721	0.645352
								CZIB	39.7078	-3.18036	1.3364	-2.37979	0.0173225	0.509386
								RFC5	391.24	-3.17925	1.43884	-2.20959	0.0271338	0.596199
								LOC102724488	29.7681	-3.17286	1.39434	-2.27553	0.0228743	0.55629
								LOC105379382	65.0725	-3.17213	1.48689	-2.1334	0.0328917	0.64171
								NRARP	18.9357	-3.17036	1.4563	-2.17699	0.0294814	0.614309
								MIR631	25.5367	-3.17019	1.27347	-2.48941	0.0127954	0.44958
								SLC25A21	51.2378	-3.16427	1.18952	-2.66012	0.00781136	0.355155
								POM121L11P	496.929	-3.16183	1.29231	-2.44665	0.0144189	0.470408
								TMEM98	4.29924	-3.1609	1.5791	-2.00171	0.0453162	0.717684
								ENPP7P4	59.2344	-3.15424	1.48623	-2.12232	0.0338111	0.648553
								EFCC1	21.3076	-3.14738	0.828867	-3.7972	0.000146339	0.0295541
								ZNF784	17.2719	-3.14568	1.51411	-2.07757	0.0377487	0.673913
								CBR4	893.229	-3.13992	0.979547	-3.20549	0.00134835	0.136154
								LOC102723342	1626.55	-3.13026	1.36119	-2.29965	0.0214682	0.547752
								MCCD1	24.3681	-3.12664	1.2233	-2.5559	0.0105914	0.408612
								LOC107985236	72.2773	-3.12657	1.1792	-2.65144	0.00801485	0.357284
								TMEM147-AS1	618.981	-3.12486	1.36897	-2.28264	0.0224517	0.553166
								DTNB-AS1	152.529	-3.12458	1.36891	-2.28253	0.0224581	0.553166
								PIGH	47.1067	-3.11827	1.53259	-2.03464	0.0418873	0.696301
								MPI	327.673	-3.11751	1.43375	-2.17437	0.0296773	0.614309
								MPV17L2	43.4209	-3.1129	1.54413	-2.01595	0.0438051	0.711138
								LOC105378690	17.3871	-3.1112	1.38929	-2.23942	0.0251283	0.580886
								CAPS	16.4539	-3.1077	1.46427	-2.12236	0.0338077	0.648553
								CALML4	83.6761	-3.09989	1.27822	-2.42517	0.0153011	0.483589
								LOC107985923	16.0474	-3.09501	1.5619	-1.98157	0.047527	0.731123
								SH3GL1P3	47.478	-3.09377	1.23908	-2.49683	0.0125309	0.445683
								NOP53-AS1	99.875	-3.09046	1.31214	-2.35528	0.0185087	0.526888
								TCIRG1	286.019	-3.08744	1.34342	-2.29819	0.021551	0.547752
								RPS2P5	198.925	-3.0838	1.45864	-2.11416	0.0345015	0.654353
								LSMEM2	328.237	-3.08282	1.34529	-2.29157	0.0219307	0.548652
								LOC107985388	72.0784	-3.08225	1.41692	-2.17532	0.0296063	0.614309
								DNAAF1	367.461	-3.08178	1.34564	-2.29019	0.0220101	0.549471
								TSPAN31	1803.9	-3.07642	1.23634	-2.48833	0.0128344	0.44958
								RABGEF1	161.127	-3.07387	1.52901	-2.01036	0.0443931	0.714504
								ENC1	166.078	-3.06583	1.00533	-3.04957	0.00229167	0.186098
								KANSL1	560.016	-3.06302	1.43511	-2.13434	0.0328149	0.641572
								AP1M2	32.8023	-3.06017	0.647048	-4.72943	2.25154e-06	0.000804494
								ZBTB17	202.865	-3.05512	1.39779	-2.18567	0.0288397	0.612332
								LOC101928953	817.929	-3.05491	1.31468	-2.32368	0.0201426	0.536622
								LOC105374841	359.028	-3.0539	1.13513	-2.69034	0.00713784	0.345131
								NTPCR	44.6269	-3.05067	1.46017	-2.08926	0.0366845	0.667643
								SIAH1	269.236	-3.04657	1.27189	-2.39532	0.016606	0.498286
								SPINT1-AS1	534.768	-3.0448	1.13788	-2.67585	0.00745393	0.347625
								LOC105377700	241.097	-3.04291	1.18618	-2.5653	0.0103086	0.405456
								ZSCAN22	41.5909	-3.0402	1.47221	-2.06506	0.0389169	0.678034
								SNAPC3	639.957	-3.0362	1.33967	-2.26637	0.0234286	0.563614
								CENPP	254.089	-3.02614	1.42326	-2.1262	0.0334867	0.645954
								YARS2	165.68	-3.02442	1.4296	-2.11557	0.0343818	0.653452
								TYRP1	14.9987	-3.01607	1.30628	-2.30891	0.0209488	0.543856
								S100A14	41.1067	-3.01359	0.749773	-4.01934	5.83609e-05	0.0138309
								RASD2	7.20552	-3.01209	1.51628	-1.98651	0.0469772	0.72879
								ENPP7P6	17.2946	-3.00632	1.40879	-2.13397	0.0328452	0.641572
								LOC105372420	11.0429	-3.00214	1.12976	-2.65733	0.00787616	0.357118
								UBE2D3	67.1669	-3.00136	1.39977	-2.14418	0.0320181	0.637527
								SLC18A2	241.637	-2.99148	1.2204	-2.45124	0.0142366	0.467583
								USP17L2	8.33965	-2.98446	1.37249	-2.17448	0.0296688	0.614309
								CD81-AS1	514.463	-2.97891	1.36813	-2.17736	0.0294541	0.614309
								ZNF32-AS1	63.1867	-2.97614	1.21611	-2.44726	0.0143949	0.470408
								PTMA	517.956	-2.97388	1.48374	-2.00432	0.0450362	0.715925
								LOC105372480	64.0557	-2.97369	1.45335	-2.0461	0.0407469	0.689195
								CKM	22.0226	-2.97016	0.914227	-3.24882	0.00115886	0.120693
								SAXO1	98.5976	-2.95176	1.42528	-2.07101	0.0383579	0.674116
								INHBE	10.8185	-2.94999	1.11035	-2.65682	0.00788811	0.357118
								LOC105377924	29.6567	-2.94988	0.890139	-3.31395	0.000919864	0.102421
								MINDY1	36.1319	-2.94438	0.988192	-2.97956	0.00288663	0.212268
								MEA1	1048.6	-2.94386	1.38001	-2.13321	0.0329075	0.64171
								C16orf96	10.9823	-2.93411	1.1887	-2.46834	0.0135743	0.456902
								SUCNR1	29.0447	-2.92755	1.04197	-2.80961	0.00496008	0.285882
								ATCAY	4.71456	-2.92516	1.42814	-2.04823	0.0405371	0.689195
								ERI2	142.1	-2.92433	0.681865	-4.28872	1.79702e-05	0.00474271
								ABHD1	282.267	-2.9208	1.32098	-2.21108	0.02703	0.596199
								NRG4	206.278	-2.91508	1.29131	-2.25746	0.0239795	0.570035
								C8orf82	28.8011	-2.91505	1.2547	-2.3233	0.0201629	0.536622
								HOXA10-AS	222.405	-2.89941	1.2184	-2.3797	0.0173268	0.509386
								ALG1L2	39.2969	-2.8994	1.06993	-2.70989	0.00673045	0.334006
								ETFBKMT	206.93	-2.89817	1.12431	-2.57773	0.00994504	0.400996
								PRNCR1	13.653	-2.8946	1.00096	-2.89184	0.00382999	0.251987
								KIF24	190.146	-2.89274	1.3989	-2.06788	0.0386517	0.676988
								LOC105372282	428.14	-2.89128	1.32775	-2.17757	0.0294382	0.614309
								RPS14	755.802	-2.8882	1.34618	-2.14548	0.0319147	0.637333
								SBSPON	19.5937	-2.8796	1.3038	-2.20862	0.0272012	0.59658
								TOMM20	50.5373	-2.87762	1.41745	-2.03015	0.0423417	0.697505
								LOC105374809	92.8717	-2.87707	0.976194	-2.94723	0.00320633	0.226344
								TTC16	14.6497	-2.87634	1.16898	-2.46055	0.0138724	0.462246
								SCLT1	46.3196	-2.87356	1.32273	-2.17245	0.0298217	0.615056
								IL17D	61.7199	-2.87289	1.21941	-2.35597	0.0184744	0.526888
								TMEM198	992.467	-2.87065	1.42853	-2.00951	0.0444826	0.715449
								TRIM7-AS1	113.961	-2.86788	1.17534	-2.44003	0.0146859	0.475041
								CEBPB-AS1	1893.03	-2.86657	1.26855	-2.25972	0.0238387	0.568561
								LOC102724652	47.9977	-2.85379	1.44337	-1.97718	0.0480217	0.734236
								EFNB2	21.9526	-2.85294	0.859884	-3.31782	0.000907234	0.10179
								LOC105373096	45.8014	-2.85289	1.25955	-2.26501	0.0235118	0.564113
								TIMM22	61.6082	-2.84814	1.43261	-1.98807	0.0468038	0.728092
								ACOXL	19.6242	-2.84106	1.16798	-2.43247	0.0149963	0.477151
								GATC	2858.37	-2.84055	1.29436	-2.19456	0.0281949	0.605201
								TRABD2A	4.18638	-2.83804	1.3663	-2.07717	0.0377861	0.673913
								IL21R-AS1	9.52843	-2.83793	1.08061	-2.62623	0.00863364	0.370819
								LOC105375270	8.5607	-2.83501	1.14192	-2.48267	0.0130403	0.451111
								EREG	123.399	-2.8251	1.12389	-2.51368	0.0119478	0.433574
								ALG1L3P	4.14226	-2.82083	1.37882	-2.04583	0.040773	0.689195
								FAM20A	3630.43	-2.81892	1.21893	-2.31262	0.0207435	0.540706
								CACNA1D	51.4029	-2.818	1.21111	-2.32679	0.0199766	0.536622
								SLC25A26	67.6413	-2.81768	1.39723	-2.01662	0.0437351	0.710811
								CARM1	561.816	-2.81321	1.29619	-2.17037	0.0299787	0.615443
								LENG9	166.942	-2.81148	1.20682	-2.32965	0.0198245	0.536622
								B4GALT6	22.2377	-2.80935	1.00916	-2.78385	0.00537175	0.297754
								NME9	98.2909	-2.80572	1.31284	-2.13714	0.0325869	0.641572
								SERHL	228.514	-2.80256	1.31849	-2.12558	0.0335385	0.646416
								ALG1L13P	66.0294	-2.79628	1.10984	-2.51953	0.0117511	0.429792
								LOC646471	396.827	-2.78666	1.22696	-2.27119	0.0231353	0.558542
								RMI1	236.267	-2.78124	1.24299	-2.23755	0.0252505	0.580886
								MCF2L2	83.6119	-2.77771	1.14776	-2.42011	0.0155158	0.486309
								MARCHF9	14.905	-2.7766	1.03934	-2.67151	0.00755106	0.349902
								FRY	10.3974	-2.77658	1.04245	-2.66352	0.00773286	0.354232
								LMNTD2	98.3957	-2.76867	0.493617	-5.60894	2.03564e-08	9.45554e-06
								MYO7A	9.75959	-2.76587	1.14662	-2.41218	0.0158573	0.491124
								LOC105371291	10.5695	-2.76141	0.985134	-2.80308	0.00506177	0.285882
								VIPR2	6.23753	-2.76125	1.35019	-2.04508	0.0408467	0.68981
								ANKS1B	145.361	-2.75512	1.25105	-2.20225	0.0276478	0.601237
								EPB41L4A	51.1633	-2.75358	1.173	-2.34747	0.0189013	0.528894
								LOC112268179	97.0001	-2.7488	1.35324	-2.03127	0.0422278	0.697357
								ZNF687-AS1	18.2208	-2.74579	1.06546	-2.57709	0.00996361	0.401048
								TUBB8P1	29.3966	-2.74056	0.745641	-3.67544	0.000237436	0.0427476
								ALG1L	92.8237	-2.73565	1.03173	-2.65152	0.00801292	0.357284
								PKMYT1	507.76	-2.73557	1.30345	-2.09872	0.0358418	0.662233
								OR7E128P	6.45306	-2.73532	1.32039	-2.07161	0.0383019	0.674116
								THAP3	820.681	-2.73297	1.23648	-2.21028	0.0270855	0.596199
								C22orf15	263.749	-2.73256	1.1805	-2.31475	0.0206264	0.539468
								PLPP5	214.675	-2.72524	1.25377	-2.17363	0.0297329	0.614912
								FAM110C	5.85316	-2.72203	1.2359	-2.20248	0.0276317	0.601237
								SEC1P	119.269	-2.71831	1.33498	-2.03621	0.0417292	0.695735
								FA2H	6.63898	-2.71265	1.38317	-1.96118	0.0498582	0.742585
								CGREF1	135.075	-2.71155	1.36588	-1.9852	0.0471218	0.729117
								DDIT3	217.723	-2.70967	1.20683	-2.24528	0.0247502	0.577133
								FHAD1	13.4949	-2.70475	0.89674	-3.0162	0.00255967	0.198981
								ARHGAP45	268.977	-2.70212	1.12436	-2.40326	0.0162497	0.494708
								LINC01138	6.31691	-2.69506	1.35582	-1.98778	0.0468361	0.728092
								KRT8	9363.29	-2.69043	1.36364	-1.97298	0.0484975	0.735729
								COX11	476.38	-2.68944	1.01107	-2.66	0.00781417	0.355155
								TRIM31	16.272	-2.68427	1.31823	-2.03627	0.041723	0.695735
								PPP1R13B	272.294	-2.68413	1.24009	-2.16447	0.0304281	0.618278
								GPR15	40.7273	-2.68024	0.799437	-3.35265	0.000800404	0.0943624
								PODXL2	6.44487	-2.6784	1.16675	-2.29562	0.0216978	0.547752
								HMGN3-AS1	218.723	-2.67611	1.22589	-2.183	0.0290361	0.613683
								CYTH4	33.2659	-2.67014	0.951129	-2.80734	0.00499532	0.285882
								SYNE1-AS1	10.7946	-2.66898	1.01487	-2.62987	0.00854181	0.368831
								GPR137	213.554	-2.66098	1.25214	-2.12513	0.0335754	0.646591
								RPS28	130.014	-2.66021	1.28336	-2.07285	0.0381861	0.674116
								LOC728975	42.7046	-2.65758	1.35591	-1.96	0.0499958	0.743851
								SFTPD	7.31829	-2.65575	1.11377	-2.38447	0.0171037	0.507324
								LDLRAD2	857.871	-2.6523	1.34692	-1.96916	0.0489346	0.736556
								RHOF	219.649	-2.65178	1.26066	-2.10348	0.0354234	0.660056
								PDSS1	80.6554	-2.64861	1.32788	-1.99461	0.0460852	0.721732
								FANK1	37.1568	-2.64623	1.32732	-1.99367	0.0461881	0.721883
								EYA4	15.6873	-2.64395	0.844888	-3.12935	0.00175192	0.160357
								PUSL1	103.117	-2.64071	1.26104	-2.09408	0.0362529	0.665199
								FAM71E1	542.924	-2.63968	1.21331	-2.17559	0.0295856	0.614309
								KANK3	59.3811	-2.6362	1.044	-2.52509	0.011567	0.427392
								LOC105376308	47.5862	-2.63166	1.13487	-2.3189	0.0204005	0.53803
								DAAM2	20.039	-2.63048	0.866815	-3.03465	0.00240815	0.193527
								WDR54	372.925	-2.62795	1.1675	-2.25092	0.0243907	0.576272
								LOC107986424	10.874	-2.62677	1.02015	-2.57487	0.0100277	0.401541
								LNX1	418.474	-2.62342	1.05309	-2.49116	0.0127326	0.448732
								BEGAIN	23.3715	-2.62218	1.00867	-2.59962	0.00933258	0.388439
								PKDREJ	91.4767	-2.61947	0.978371	-2.67738	0.00741998	0.347309
								FOXP1	9.01724	-2.61674	1.11722	-2.34219	0.0191709	0.52897
								DDN	64.2119	-2.61605	0.869104	-3.01006	0.00261198	0.198995
								LOC112268056	79.9767	-2.61013	1.21512	-2.14805	0.0317099	0.633789
								SLC5A10	577.583	-2.60969	1.24945	-2.08866	0.0367383	0.667643
								TIPARP-AS1	66.0091	-2.60651	1.13075	-2.30512	0.0211597	0.546644
								PERM1	106.728	-2.60207	1.31709	-1.97561	0.0481987	0.735071
								LITAF	39.5104	-2.59863	1.14261	-2.27429	0.0229488	0.55662
								SH2D7	26.719	-2.59796	0.936529	-2.77403	0.00553658	0.303271
								RCCD1-AS1	871.29	-2.59604	1.1984	-2.16626	0.0302916	0.616678
								CLDN2	49.475	-2.5933	0.577709	-4.48894	7.15794e-06	0.00213132
								BAIAP2L2	39.0839	-2.58867	0.761107	-3.40119	0.000670942	0.085151
								GTPBP1	593.622	-2.58832	1.15671	-2.23766	0.0252435	0.580886
								APBB1	6.10638	-2.58709	1.25814	-2.05628	0.0397558	0.683722
								ESRP2	412.615	-2.57979	1.28453	-2.00836	0.044605	0.715465
								LOC105376794	323.95	-2.57846	1.14547	-2.251	0.0243856	0.576272
								ELP5	239.422	-2.57158	1.04134	-2.46949	0.0135304	0.456902
								HIC1	333.887	-2.56598	1.23567	-2.07659	0.0378396	0.673913
								LRRC56	15.7386	-2.56412	1.30756	-1.961	0.0498787	0.742585
								MELTF-AS1	302.563	-2.56194	1.28418	-1.995	0.0460424	0.721732
								UBQLN1-AS1	85.0416	-2.55941	1.25472	-2.03983	0.0413673	0.691689
								HOXB-AS3	317.918	-2.55906	1.11535	-2.2944	0.0217677	0.547858
								MEST	158.646	-2.55705	1.18226	-2.16285	0.030553	0.619321
								TMEM127	12.1142	-2.55604	1.30322	-1.96132	0.0498419	0.742585
								LOC105376806	446.994	-2.55575	1.20427	-2.12224	0.0338178	0.648553
								LOC102724916	88.01	-2.5485	1.15777	-2.20121	0.0277213	0.60141
								RPS18	179.759	-2.54795	1.27258	-2.00219	0.0452646	0.717684
								ERICH6-AS1	5.64828	-2.54697	1.16275	-2.19048	0.0284894	0.608708
								YRDC	155.292	-2.54648	1.27094	-2.00362	0.0451111	0.716255
								LOC101927764	14.2782	-2.54522	1.28518	-1.98044	0.0476542	0.731506
								TXNRD2	136.558	-2.54094	1.24883	-2.03465	0.0418861	0.696301
								LGALS2	70.1987	-2.53637	0.555509	-4.56584	4.9749e-06	0.00160475
								EPGN	13.0481	-2.53617	1.04153	-2.43504	0.0148902	0.476086
								SCX	1111.18	-2.53421	1.08162	-2.34299	0.0191299	0.52897
								SLC25A5-AS1	2240.39	-2.53332	1.13285	-2.23623	0.0253364	0.580886
								ENKD1	9.32209	-2.52294	1.13639	-2.22014	0.0264093	0.588633
								IRAG1	16.8711	-2.52165	0.763706	-3.30185	0.00096048	0.105721
								CTNS	175.278	-2.51971	1.08353	-2.32546	0.0200471	0.536622
								CSNK1D	2063.44	-2.51953	1.15872	-2.1744	0.0296752	0.614309
								HEXD	221.291	-2.51878	1.08185	-2.32822	0.0199007	0.536622
								ANXA10	60.1702	-2.51747	1.14493	-2.19881	0.0278915	0.60141
								PTOV1-AS2	2302.71	-2.51098	1.16278	-2.15946	0.0308147	0.622323
								RPL31	84.6612	-2.50873	1.08694	-2.30807	0.0209953	0.543856
								RBIS	84.2366	-2.50603	1.27347	-1.96788	0.0490819	0.737818
								SSTR2	39.0226	-2.50434	0.618318	-4.05025	5.11635e-05	0.0122502
								FBLN7	72.5034	-2.50186	1.21783	-2.05436	0.0399408	0.685607
								FKBP1B	266.113	-2.50059	1.12715	-2.21851	0.0265197	0.590528
								SYNC	1783.45	-2.49517	1.18744	-2.1013	0.035615	0.660056
								TRIM66	8773.14	-2.49442	1.06538	-2.34134	0.0192145	0.52897
								APBA3	73.8126	-2.49223	1.00691	-2.47514	0.0133186	0.455951
								CACNA1C	13.1276	-2.48988	1.15207	-2.16122	0.0306783	0.620107
								SDR39U1	502.417	-2.48922	1.12249	-2.21759	0.0265826	0.590796
								BCL2L12	289.376	-2.48802	1.24941	-1.99136	0.0464418	0.724386
								STAG3	329.437	-2.48676	0.625344	-3.97663	6.9899e-05	0.0162341
								DPP4	11.4881	-2.48251	1.20192	-2.06546	0.0388796	0.678034
								MRNIP	736.932	-2.47341	1.16725	-2.11901	0.0340894	0.651289
								LIX1L-AS1	851.012	-2.46892	1.14192	-2.16207	0.0306127	0.619321
								CNPY2-AS1	71.8778	-2.46488	1.17855	-2.09145	0.0364875	0.66758
								SLC2A12	22.4477	-2.46314	1.2372	-1.9909	0.0464918	0.724607
								PEG10	10.8767	-2.46028	0.938068	-2.62271	0.00872336	0.372641
								TROAP-AS1	128.123	-2.4572	1.12141	-2.19117	0.0284394	0.6082
								LOC101928045	686.54	-2.45705	1.07093	-2.29431	0.0217728	0.547858
								TSEN54	267.823	-2.45665	1.07888	-2.27703	0.0227843	0.55629
								CEBPZOS	195.74	-2.45619	1.16282	-2.11227	0.0346631	0.655578
								SPINT1	195.411	-2.45197	1.2484	-1.9641	0.0495185	0.742463
								STARD7-AS1	206.627	-2.45131	1.13763	-2.15475	0.0311814	0.62646
								PAX9	7.09753	-2.44731	1.24797	-1.96103	0.0498758	0.742585
								LOC101927401	82.37	-2.4438	1.0064	-2.42825	0.0151721	0.481382
								DCST2	14.7414	-2.43901	1.09188	-2.23377	0.0254981	0.581763
								CDS1	10.7946	-2.43728	1.11047	-2.19482	0.0281765	0.605201
								ZCWPW2	24.3205	-2.43561	1.07497	-2.26575	0.0234667	0.563614
								HSD17B1P1	65.1173	-2.42574	1.17154	-2.07055	0.0384007	0.674116
								PITPNM3	6.75352	-2.42064	1.16735	-2.07362	0.0381143	0.673913
								SATL1	147.153	-2.41922	1.1358	-2.12997	0.0331743	0.643671
								CYP2U1-AS1	30.2879	-2.41681	0.615024	-3.92962	8.50804e-05	0.0189999
								DERL3	47.2166	-2.41539	1.20293	-2.00791	0.0446524	0.715702
								ABRAXAS1	343.049	-2.4085	1.21516	-1.98204	0.0474747	0.731123
								LRRC14	310.486	-2.39645	1.00443	-2.38587	0.0170388	0.506963
								LOC651337	16.2995	-2.38934	1.0398	-2.29788	0.0215686	0.547752
								MEGF11	278.09	-2.38394	1.17716	-2.02516	0.0428509	0.703331
								VPS4A	920.503	-2.38297	1.06167	-2.24456	0.0247966	0.577428
								C21orf62	12.9576	-2.3809	0.90664	-2.62607	0.0086378	0.370819
								DM1-AS	305.417	-2.37769	1.02067	-2.32954	0.0198306	0.536622
								SYT1	33.3097	-2.37314	1.03303	-2.29725	0.0216044	0.547752
								LRRC37A16P	370.199	-2.37294	1.05981	-2.23902	0.0251545	0.580886
								LGALS8	600.77	-2.36645	1.02883	-2.30013	0.0214407	0.547752
								LOC105377945	192.797	-2.36115	0.614205	-3.84425	0.000120924	0.0253692
								RPRML	7.98037	-2.36034	1.07842	-2.18871	0.0286182	0.610338
								NEXN	185.821	-2.35492	1.14282	-2.06062	0.039339	0.681319
								CYB561A3	53.6498	-2.34479	0.843031	-2.78138	0.00541276	0.299313
								LOC112268170	2552.36	-2.34444	1.08977	-2.15132	0.0314513	0.630248
								NIFK-AS1	214.683	-2.3312	1.16721	-1.99725	0.0457977	0.721732
								S100A13	582.229	-2.33005	1.10513	-2.10839	0.0349973	0.658148
								LOC107985877	101.592	-2.32336	1.16526	-1.99385	0.046169	0.721883
								THBS3-AS1	277.382	-2.32133	0.87927	-2.64007	0.00828893	0.364603
								FARSA-AS1	536.865	-2.31909	1.14035	-2.03366	0.0419858	0.696514
								ARHGEF9	10.5672	-2.31732	0.903237	-2.56557	0.0103005	0.405456
								B3GNT4	972.29	-2.31133	1.16602	-1.98224	0.0474523	0.731123
								DENND1C	779.568	-2.30769	0.736618	-3.13282	0.00173136	0.160301
								MAP3K12	772.083	-2.29876	1.08607	-2.11659	0.0342947	0.653401
								CTBP1-AS	2058.19	-2.29616	1.04708	-2.19292	0.028313	0.606613
								OGFOD3	61.3446	-2.29548	1.05374	-2.17841	0.0293757	0.614309
								ALX3	166.648	-2.29388	1.12093	-2.04641	0.0407164	0.689195
								KRT7-AS	51.1071	-2.28691	0.590012	-3.87603	0.000106174	0.0230456
								RBP1	36.1981	-2.28409	0.614281	-3.71832	0.000200554	0.0381793
								PTK6	22.7326	-2.28305	0.872895	-2.61549	0.00890984	0.377611
								SATB2	76.1333	-2.28046	0.969095	-2.35319	0.0186132	0.526888
								MROH9	9.59108	-2.27764	1.00249	-2.27198	0.0230875	0.558542
								BACE1-AS	43.843	-2.2759	0.665481	-3.41993	0.000626376	0.0816594
								PDE2A	9.41644	-2.27213	0.981206	-2.31565	0.0205776	0.538799
								LOC105372506	35.2817	-2.26738	0.823514	-2.7533	0.00589971	0.313549
								LOC107985023	453.945	-2.26611	0.948653	-2.38876	0.0169052	0.504657
								NDUFB8P2	9.39438	-2.26486	0.967419	-2.34114	0.019225	0.52897
								UPK1A	42.6308	-2.26322	0.986709	-2.2937	0.0218077	0.548142
								SIX5	16.809	-2.26184	1.13492	-1.99295	0.0462673	0.722634
								PSG1	9.91757	-2.25906	1.1117	-2.03207	0.0421462	0.697357
								THOC6	158.111	-2.25746	0.879488	-2.56679	0.0102644	0.405456
								TRIM52	160.772	-2.25104	1.09809	-2.04997	0.0403678	0.689159
								LOC101929240	82.6833	-2.24962	1.13205	-1.98721	0.0468987	0.728577
								BSPRY	20.9173	-2.24793	0.696877	-3.22571	0.00125659	0.129708
								HOXD8	7.42137	-2.24553	1.03623	-2.16702	0.0302337	0.616678
								NOP14-AS1	1007.23	-2.24334	1.01473	-2.21077	0.0270517	0.596199
								ANK3	24.0438	-2.24193	0.835318	-2.68393	0.00727626	0.346802
								RGS2	22.6815	-2.23952	0.814865	-2.74833	0.00599001	0.316989
								TDRD6	16.3471	-2.23841	0.923337	-2.42426	0.0153395	0.484048
								ZACN	1783.78	-2.23393	1.13124	-1.97476	0.0482955	0.735517
								SPTB	239.096	-2.23345	1.10516	-2.02094	0.0432864	0.705997
								WDR55	342.679	-2.23248	1.11908	-1.99491	0.0460523	0.721732
								C19orf44	1114.1	-2.23121	1.12734	-1.97918	0.0477956	0.732708
								WDR83	1513.54	-2.22858	1.09001	-2.04456	0.0408985	0.68981
								EVL	15.6761	-2.22208	1.08597	-2.04618	0.040739	0.689195
								SNX21	93.3141	-2.22132	1.08558	-2.0462	0.0407363	0.689195
								LOC101929185	1342.07	-2.22065	1.06451	-2.08609	0.0369709	0.669773
								WEE2	11.3535	-2.21773	0.873427	-2.53911	0.0111134	0.419936
								MEF2C-AS2	85.5675	-2.21588	0.983861	-2.25223	0.0243078	0.575483
								FAAP100	54.751	-2.21164	1.01622	-2.17635	0.0295294	0.614309
								DNAJB13	14.3656	-2.20955	0.871275	-2.53599	0.0112129	0.420238
								ZNF614	8.15099	-2.2032	1.05197	-2.09436	0.0362281	0.665199
								SPDYA	69.2131	-2.197	1.00654	-2.18272	0.0290563	0.613683
								FAM86B3P	10.061	-2.18898	1.03073	-2.12372	0.0336936	0.64833
								FMNL3	472.611	-2.18878	0.974372	-2.24635	0.0246814	0.577133
								PLAC9	22.998	-2.18191	0.643595	-3.39019	0.000698454	0.0871612
								LOC105372485	14.6381	-2.18052	1.04265	-2.09134	0.036498	0.66758
								POU5F1	30.7448	-2.17852	0.678025	-3.21304	0.00131336	0.134373
								LOC107985020	36.0955	-2.17521	0.761798	-2.85536	0.00429876	0.268939
								HVCN1	33.0248	-2.17451	0.927216	-2.3452	0.0190167	0.52897
								PLPP1	144.207	-2.17181	0.970147	-2.23864	0.0251793	0.580886
								NEURL1	27.9173	-2.17134	0.76097	-2.85338	0.00432562	0.268939
								HEATR4	24.4628	-2.17006	0.797322	-2.72168	0.006495	0.329541
								GSN-AS1	192.639	-2.16486	1.04406	-2.0735	0.0381254	0.673913
								DND1	521.903	-2.1562	0.891602	-2.41834	0.0155914	0.488019
								PLEKHG3	224.023	-2.15296	0.944371	-2.27978	0.0226206	0.553166
								ARID5B	23.5968	-2.1496	0.971428	-2.21282	0.0269099	0.595789
								PLEKHJ1	167.496	-2.14904	0.658995	-3.26109	0.00110983	0.117698
								DNASE1	4677.84	-2.14073	1.05827	-2.02287	0.0430867	0.705159
								LOC105371121	24.0876	-2.13889	0.908192	-2.35511	0.0185174	0.526888
								TTC36	8.36839	-2.13824	1.06592	-2.00601	0.0448557	0.715765
								GPAT2	198.458	-2.13752	0.999445	-2.13871	0.0324593	0.641572
								DYNC2H1	13.8791	-2.13463	0.966074	-2.2096	0.0271331	0.596199
								ODAD3	916.085	-2.13017	1.07251	-1.98616	0.0470157	0.72879
								TTC3-AS1	175.148	-2.12826	1.02298	-2.08045	0.0374842	0.673295
								TRIM54	16.7008	-2.11696	0.860608	-2.45985	0.0138996	0.46249
								NDUFS7	45.1907	-2.11252	1.03422	-2.04262	0.0410905	0.69036
								SEPTIN4-AS1	43.9717	-2.11014	0.888246	-2.37562	0.0175194	0.512453
								TMEM211	10.8354	-2.1038	1.0416	-2.01978	0.0434061	0.707428
								KHK	44.8543	-2.09891	0.658944	-3.18527	0.00144619	0.142927
								ERLNC1	122.169	-2.09873	1.005	-2.08828	0.0367723	0.667643
								SYNE1	26.0317	-2.09242	0.965677	-2.16679	0.0302508	0.616678
								TNK1	210.84	-2.09114	1.02852	-2.03316	0.0420363	0.696854
								CTRL	51.2785	-2.08985	0.858601	-2.43402	0.0149323	0.476376
								LOC107985361	139.183	-2.08525	1.0426	-2.00005	0.0454946	0.719272
								AJUBA-DT	61.8559	-2.08472	0.916885	-2.2737	0.0229838	0.55662
								SLC7A11-AS1	20.9343	-2.07618	0.884061	-2.34845	0.0188516	0.528894
								LOC105378586	73.389	-2.07252	0.892648	-2.32176	0.0202456	0.536622
								LOC105372141	27.4042	-2.07195	0.613971	-3.37467	0.000739038	0.0889335
								LYPD1	109.021	-2.06312	0.995003	-2.07348	0.038128	0.673913
								AANAT	20.3347	-2.0593	0.680046	-3.02818	0.00246028	0.196357
								ALG1L6P	215.27	-2.05482	0.978007	-2.10103	0.0356388	0.660056
								IL16	58.4229	-2.04968	0.87003	-2.35587	0.0184792	0.526888
								TMEM140	257.973	-2.04919	1.02226	-2.00457	0.0450089	0.715925
								TMED1	279.672	-2.04306	0.813879	-2.51027	0.0120638	0.43574
								BLK	25.5057	-2.04236	0.642755	-3.17751	0.00148548	0.14387
								FAM13A-AS1	38.4745	-2.03936	0.926726	-2.2006	0.0277641	0.60141
								NODAL	14.4372	-2.03898	0.908755	-2.2437	0.0248514	0.577753
								NSUN5P2	111.094	-2.0368	0.665148	-3.06217	0.00219739	0.182276
								GLB1L	61.6158	-2.03675	0.961235	-2.11889	0.0340998	0.651289
								CYP2A7	15.5418	-2.03207	0.931446	-2.18163	0.0291367	0.614309
								ZNF205-AS1	157.442	-2.02523	0.986425	-2.0531	0.0400626	0.685745
								FAM151A	438.567	-2.02506	0.746365	-2.71323	0.00666317	0.3329
								EME2	2505.6	-2.02504	1.02725	-1.97131	0.048688	0.735729
								H3-3A	28.8832	-2.02099	1.00413	-2.01267	0.0441491	0.712553
								RUNDC3A	20.8987	-2.01303	0.75093	-2.68072	0.00734643	0.346915
								PCYOX1L	15.0476	-2.01188	0.906041	-2.22052	0.0263837	0.588628
								LOC100505549	48.4158	-2.00654	0.551608	-3.63761	0.000275181	0.0474493
								LOC100506606	18.999	-2.00529	0.887443	-2.25963	0.0238441	0.568561
								AGAP2-AS1	391.018	-2.00501	1.01215	-1.98094	0.0475977	0.731123
								TMEM79	35.0064	-1.99736	0.773551	-2.58207	0.00982104	0.398069
								LOC105372717	109.974	-1.99356	0.811218	-2.45749	0.0139911	0.462883
								RXYLT1-AS1	78.2391	-1.99345	0.994959	-2.00355	0.0451186	0.716255
								LOC101928864	86.182	-1.98487	0.846751	-2.3441	0.0190733	0.52897
								ZNF32-AS2	50.1498	-1.98138	0.826471	-2.3974	0.0165118	0.496581
								ASMTL-AS1	804.178	-1.98057	0.727747	-2.7215	0.00649859	0.329541
								PRKAG1	128.61	-1.97343	0.743349	-2.65478	0.0079359	0.357284
								CELF3	11.7589	-1.96853	0.860546	-2.28754	0.0221646	0.551739
								LOC105369626	13.7728	-1.96705	0.844897	-2.32815	0.0199042	0.536622
								MTUS1	161.542	-1.96169	0.826781	-2.37269	0.0176592	0.513558
								LOC729867	89.7114	-1.95933	0.908765	-2.15604	0.0310807	0.625867
								ACSM3	153.687	-1.95815	0.928095	-2.10985	0.034871	0.656303
								PSG8	12.7263	-1.95742	0.880782	-2.22237	0.0262583	0.586405
								PLA2G7	15.8479	-1.95729	0.829677	-2.35909	0.0183197	0.52654
								LRP2BP	223.386	-1.94896	0.643277	-3.02974	0.00244765	0.196023
								HOXB5	10.2062	-1.94689	0.882185	-2.20689	0.0273216	0.596937
								RUFY1-AS1	195.304	-1.94526	0.945176	-2.0581	0.0395808	0.683722
								USP3-AS1	276.595	-1.93553	0.887612	-2.18061	0.0292123	0.614309
								RAB25	30.2276	-1.93366	0.761613	-2.53891	0.0111199	0.419936
								TBC1D10C	16.5465	-1.92904	0.804158	-2.39884	0.0164472	0.496311
								SIDT2	46.4411	-1.91641	0.554406	-3.4567	0.000546843	0.0774416
								DENND4A	90.4463	-1.91351	0.903721	-2.11737	0.0342282	0.653128
								CDHR2	104.981	-1.91184	0.665369	-2.87335	0.00406145	0.259141
								LMO4	15.0841	-1.89165	0.910254	-2.07816	0.037695	0.673913
								NLRP6	52.2926	-1.88793	0.875877	-2.15547	0.0311249	0.625867
								CCDC192	19.2667	-1.88696	0.882059	-2.13927	0.0324138	0.641236
								ANKRD13A	77.6837	-1.88616	0.916005	-2.05912	0.039483	0.683303
								DHRS3	25.9187	-1.87431	0.801211	-2.33935	0.0193174	0.529064
								CCDC102A	16.9029	-1.87218	0.839146	-2.23105	0.0256778	0.583529
								EHBP1-AS1	433.425	-1.86648	0.537741	-3.47097	0.000518582	0.0748078
								LOC101927325	29.549	-1.86529	0.67385	-2.76811	0.00563827	0.307391
								FAM85A	19.1821	-1.85374	0.791945	-2.34074	0.0192456	0.52897
								DNAH10	75.847	-1.85048	0.584302	-3.16699	0.00154024	0.14721
								SLC5A9	30.0823	-1.84312	0.782832	-2.35443	0.0185511	0.526888
								RNU4-5P	386.047	-1.83801	0.793348	-2.31678	0.0205156	0.53803
								MIR302CHG	278.083	-1.83505	0.819329	-2.2397	0.0251105	0.580886
								LOC107984016	15.3555	-1.83192	0.746088	-2.45537	0.014074	0.464964
								RNF39	88.7787	-1.83	0.931224	-1.96515	0.0493964	0.742064
								FAM86FP	20.1481	-1.82481	0.65454	-2.78794	0.0053045	0.295436
								SAPCD1-AS1	76.7181	-1.82393	0.785812	-2.32107	0.0202828	0.536622
								LOC105375751	50.7661	-1.81631	0.555522	-3.26955	0.00107718	0.114759
								PRKACB	77.0655	-1.80961	0.78793	-2.29666	0.0216381	0.547752
								LL21NC02-21A1.1	308.806	-1.80448	0.906472	-1.99066	0.0465184	0.724607
								PDE2A-AS2	18.392	-1.80048	0.764207	-2.35601	0.0184724	0.526888
								NSUN5P1	103.917	-1.79389	0.520672	-3.44533	0.000570365	0.0788869
								SEMA3A	25.7705	-1.79233	0.847829	-2.11402	0.0345138	0.654353
								IFT172	135.447	-1.7913	0.526543	-3.40201	0.000668928	0.085151
								ROBO4	32.6037	-1.78483	0.845421	-2.11118	0.0347571	0.655814
								DYNLT4	78.0822	-1.78333	0.833076	-2.14066	0.0323014	0.641089
								LOC107985034	4055.87	-1.78327	0.866552	-2.0579	0.0396002	0.683722
								HEXB	288.605	-1.781	0.577599	-3.08345	0.00204616	0.17523
								KITLG	288.49	-1.77977	0.414811	-4.29055	1.7823e-05	0.00474271
								CARD14	152.942	-1.77736	0.532063	-3.34051	0.00083625	0.0971096
								DCAF8-DT	74.4935	-1.77337	0.80164	-2.21217	0.0269547	0.596199
								SPA17	12.8525	-1.77201	0.816074	-2.17139	0.029902	0.615212
								LBHD1	679.678	-1.77152	0.852814	-2.07726	0.0377773	0.673913
								LOC107986578	56.6902	-1.7694	0.81497	-2.17112	0.0299219	0.615212
								LOC105371049	188.977	-1.76845	0.812897	-2.17549	0.0295936	0.614309
								PIK3IP1	16.3238	-1.75764	0.763273	-2.30277	0.021292	0.547752
								SPAG5-AS1	1237.48	-1.75252	0.770423	-2.27476	0.0229205	0.55662
								CTU2	103.943	-1.74848	0.883175	-1.97977	0.0477292	0.732174
								CPE	46.0533	-1.74655	0.570535	-3.06124	0.00220419	0.182276
								LRRC24	734.189	-1.74583	0.864485	-2.0195	0.0434356	0.707428
								KLK11	10.5702	-1.74324	0.884998	-1.96977	0.0488648	0.736556
								ZNF440	13.5476	-1.74066	0.883879	-1.96934	0.0489145	0.736556
								CARS1-AS1	779.038	-1.72778	0.812478	-2.12656	0.0334566	0.645954
								UBE2Q1-AS1	345.092	-1.72304	0.826632	-2.08441	0.0371233	0.671459
								NEIL1	462.923	-1.72248	0.868475	-1.98334	0.0473292	0.731123
								ESR2	25.7401	-1.72179	0.598118	-2.87869	0.00399336	0.257118
								TRAF3IP3	74.0349	-1.7203	0.863759	-1.99165	0.0464096	0.72437
								DNASE1L2	24.1576	-1.70674	0.766316	-2.2272	0.0259341	0.58408
								CD4	62.3535	-1.70503	0.66454	-2.56572	0.0102961	0.405456
								RRN3P3	28.5143	-1.70386	0.625479	-2.72408	0.0064481	0.329541
								IGSF22	32.0615	-1.70153	0.717735	-2.37069	0.0177548	0.514802
								EPB41L5	126.229	-1.68533	0.479197	-3.517	0.000436453	0.0662524
								EGR1	51.0246	-1.67072	0.553694	-3.01741	0.00254948	0.198981
								SNF8	144.298	-1.67029	0.796611	-2.09675	0.036016	0.664394
								RARRES2	24.4438	-1.66986	0.632943	-2.63824	0.00833375	0.365191
								SYCP3	28.6803	-1.66277	0.704963	-2.35866	0.0183411	0.52654
								HS3ST1	86.169	-1.66054	0.762178	-2.17868	0.0293552	0.614309
								COG8	52.3682	-1.6589	0.788222	-2.10461	0.0353251	0.660056
								CPOX	238.702	-1.65162	0.427101	-3.86706	0.000110157	0.0235905
								TOE1	86.9937	-1.64874	0.554818	-2.97168	0.00296178	0.214875
								GPR19	160.013	-1.64863	0.791494	-2.08293	0.0372572	0.671538
								MLANA	26.5866	-1.64758	0.642977	-2.56242	0.0103946	0.405456
								LOC105372261	57.5586	-1.64685	0.818522	-2.01198	0.0442218	0.712735
								CDH4	14.6784	-1.64528	0.806216	-2.04075	0.041276	0.69143
								RTBDN	42.079	-1.64257	0.580645	-2.82887	0.00467123	0.276758
								LOC107985358	116.511	-1.62906	0.546773	-2.9794	0.00288812	0.212268
								NR1I3	162.655	-1.61608	0.489712	-3.30005	0.00096667	0.1059
								TFPI	21.572	-1.61438	0.729403	-2.21329	0.0268775	0.595789
								CLBA1	17.6881	-1.60292	0.691927	-2.31661	0.0205251	0.53803
								LOC100996506	35.2959	-1.60232	0.626055	-2.55938	0.0104858	0.406565
								ERMAP	117.036	-1.60073	0.719854	-2.22368	0.02617	0.585546
								CIBAR1	234.718	-1.59855	0.784819	-2.03684	0.0416664	0.695689
								LOC107986838	350.284	-1.59547	0.378974	-4.20998	2.55388e-05	0.00666448
								DEDD	104.831	-1.59026	0.792472	-2.00671	0.0447803	0.715765
								EMC3	69.7462	-1.5872	0.499549	-3.17727	0.0014867	0.14387
								ALG1L9P	42.7308	-1.58561	0.661181	-2.39815	0.0164783	0.49638
								POLR1G	469.951	-1.57757	0.708476	-2.22671	0.0259664	0.58408
								PIK3R5	32.1213	-1.57041	0.638575	-2.45923	0.0139234	0.462619
								SIGLEC10	36.8555	-1.566	0.758239	-2.06531	0.0388938	0.678034
								MAN1A1	58.1678	-1.56414	0.565341	-2.76672	0.00566237	0.307983
								BEAN1	21.4989	-1.56249	0.653621	-2.39051	0.0168248	0.503551
								LOC105373925	119.603	-1.55797	0.743664	-2.09499	0.0361721	0.66516
								LOC105378651	49.6679	-1.55688	0.773673	-2.01232	0.0441859	0.712652
								LOC105378268	46.9043	-1.5534	0.563921	-2.75463	0.00587584	0.313549
								DNAAF3-AS1	518.148	-1.55029	0.737284	-2.10271	0.0354915	0.660056
								SYT15	29.557	-1.53836	0.668043	-2.30279	0.0212907	0.547752
								SLC9A5	48.6268	-1.5289	0.528641	-2.89213	0.00382643	0.251987
								ZNF516	30.0725	-1.52887	0.775973	-1.97026	0.0488087	0.736556
								HMGA2-AS1	577.036	-1.52691	0.463806	-3.29214	0.00099429	0.107908
								PCDH12	146.617	-1.52436	0.594757	-2.563	0.0103773	0.405456
								SYNPO	18.9853	-1.51288	0.67293	-2.2482	0.0245637	0.576471
								CYP2A6	91.9194	-1.51107	0.750251	-2.01409	0.0440003	0.711635
								GNAI1	72.4513	-1.50605	0.462491	-3.25639	0.00112839	0.119122
								TAS1R3	79.6604	-1.49839	0.687762	-2.17865	0.029358	0.614309
								ZSCAN16-AS1	69.681	-1.49568	0.54543	-2.74221	0.00610272	0.319187
								PRSS54	74.0369	-1.49565	0.680034	-2.19938	0.0278508	0.60141
								TSPEAR	37.4793	-1.49496	0.717958	-2.08224	0.0373201	0.671907
								KCTD19	51.8825	-1.48311	0.70454	-2.10508	0.0352841	0.660056
								TMPRSS6	68.0667	-1.48202	0.489592	-3.02704	0.00246959	0.196425
								ZC3H12B	45.3646	-1.47748	0.621691	-2.37655	0.0174752	0.511917
								MESTIT1	52.459	-1.47697	0.671385	-2.19988	0.0278152	0.60141
								ELP4	69.726	-1.47629	0.746601	-1.97735	0.0480019	0.734236
								ABHD12B	81.0962	-1.47148	0.678458	-2.16886	0.030093	0.616678
								ITGA7	86.0919	-1.46937	0.566963	-2.59166	0.00955148	0.391982
								PDZK1P1	31.4291	-1.45927	0.552447	-2.64147	0.0082547	0.364478
								FHOD3	77.3414	-1.45857	0.621303	-2.3476	0.0188948	0.528894
								UBXN6	107.976	-1.45581	0.544579	-2.67328	0.00751146	0.348907
								BMP8B	149.794	-1.45068	0.571873	-2.53672	0.0111897	0.420238
								CNTNAP1	147.742	-1.44782	0.45159	-3.20605	0.00134573	0.136154
								KCNG1	20.7723	-1.44594	0.705187	-2.05043	0.0403225	0.689102
								SERINC4	385.964	-1.44447	0.463726	-3.11492	0.00183996	0.164993
								LOC105371942	432.604	-1.43986	0.609937	-2.36068	0.0182415	0.526284
								BAZ1A-AS1	65.862	-1.43275	0.687126	-2.08514	0.0370567	0.670804
								ABCC3	94.0684	-1.43025	0.462735	-3.09087	0.00199573	0.17523
								LCORL	299.086	-1.42028	0.620234	-2.28992	0.0220262	0.549471
								ANKRD6	58.5405	-1.40756	0.532691	-2.64236	0.00823314	0.364218
								PDCD4	129.255	-1.40464	0.651645	-2.15553	0.03112	0.625867
								LOC112268058	136.473	-1.40066	0.576472	-2.42972	0.0151107	0.480089
								ANKRD37	50.9749	-1.39935	0.62559	-2.23685	0.025296	0.580886
								NIT1	314.878	-1.39787	0.662257	-2.11077	0.0347922	0.655814
								MAP3K13	95.1298	-1.39407	0.469252	-2.97084	0.00296985	0.214875
								EPX	27.2357	-1.39046	0.70026	-1.98563	0.0470744	0.728868
								ZNF506	38.2833	-1.38297	0.672235	-2.05727	0.0396601	0.683722
								RAB40A	51.1734	-1.3788	0.473353	-2.91283	0.00358168	0.244661
								ALKAL2	33.1134	-1.37699	0.549953	-2.50383	0.0122856	0.44033
								LOC101927864	435.756	-1.37629	0.538264	-2.5569	0.0105609	0.408115
								EPHX1	163.748	-1.37276	0.57552	-2.38526	0.0170672	0.506963
								USP50	40.4427	-1.36845	0.636689	-2.14932	0.031609	0.632316
								TLCD3A	72.4598	-1.36824	0.697482	-1.96168	0.0497997	0.742585
								FLNB-AS1	1181.71	-1.35998	0.631726	-2.15279	0.0313348	0.628455
								PDZK1	30.1172	-1.35929	0.681591	-1.9943	0.0461196	0.721784
								MAOB	27.2436	-1.3591	0.627415	-2.1662	0.0302962	0.616678
								LOC107986303	163.918	-1.34248	0.385539	-3.48209	0.000497521	0.0722182
								MBNL1-AS1	27.8601	-1.3391	0.636575	-2.1036	0.0354132	0.660056
								C1orf112	144.153	-1.33622	0.661193	-2.02093	0.043287	0.705997
								SQLE	36.4362	-1.33136	0.598137	-2.22585	0.0260245	0.58408
								TAF9B	70.1846	-1.32987	0.673178	-1.97551	0.0482108	0.735071
								ATP6V1B1	19.8628	-1.32213	0.634691	-2.0831	0.0372421	0.671538
								CFAP57	32.6399	-1.31832	0.548893	-2.40178	0.0163157	0.494708
								LOC100101148	75.252	-1.31796	0.649207	-2.03011	0.0423458	0.697505
								WNT8B	88.5628	-1.31369	0.646614	-2.03165	0.0421889	0.697357
								ALOX12B	104.28	-1.31332	0.544576	-2.41164	0.0158809	0.491124
								PRR3	51.1067	-1.30835	0.502702	-2.60264	0.00925083	0.387817
								AP3S1	226.262	-1.30703	0.492843	-2.65201	0.0080013	0.357284
								ELF3	54.9262	-1.30137	0.571764	-2.27607	0.022842	0.55629
								BCAN	1044.76	-1.29977	0.593065	-2.19162	0.0284072	0.608071
								MRPL43	357.926	-1.2987	0.609027	-2.13241	0.032973	0.642448
								COQ8A	60.2185	-1.29579	0.523944	-2.47315	0.0133928	0.455951
								MYLK4	1068.98	-1.29427	0.642421	-2.01467	0.043939	0.711138
								TRNT1	152.56	-1.287	0.615801	-2.08995	0.0366221	0.667643
								LIPH	24.5598	-1.27524	0.59609	-2.13934	0.0324081	0.641236
								ENG	140.034	-1.26562	0.439046	-2.88266	0.00394339	0.255825
								FGD1	108.143	-1.25457	0.521119	-2.40745	0.0160645	0.493952
								FOXC1	65.9886	-1.25402	0.455198	-2.75488	0.00587129	0.313549
								HSPA12B	60.4643	-1.24989	0.497722	-2.51123	0.0120312	0.43524
								PLIN4	143.806	-1.24584	0.414209	-3.00775	0.00263192	0.198995
								FAM13A	33.3438	-1.24181	0.592525	-2.09579	0.0361008	0.665087
								GPR68	98.8992	-1.24013	0.415269	-2.98634	0.00282341	0.2095
								SLC25A4	36.303	-1.23982	0.563261	-2.20115	0.0277253	0.60141
								CHKA	26.5881	-1.23925	0.617949	-2.00543	0.0449171	0.715765
								PPARG	45.3814	-1.22754	0.504656	-2.43244	0.0149976	0.477151
								PDLIM5	111.911	-1.22124	0.555447	-2.19867	0.0279014	0.60141
								KLF3-AS1	75.0073	-1.21987	0.488028	-2.49959	0.0124337	0.443797
								KCNIP4	41.9675	-1.21955	0.518406	-2.3525	0.0186476	0.526888
								SRMS	92.259	-1.21871	0.605371	-2.01316	0.0440982	0.712553
								IDH2-DT	269.218	-1.21758	0.572144	-2.12809	0.0333293	0.64506
								LOC100129917	347.247	-1.20569	0.39501	-3.0523	0.00227098	0.185065
								CFAP410	37.1514	-1.19447	0.595308	-2.00646	0.0448067	0.715765
								FRMD4A	108.455	-1.1943	0.575689	-2.07455	0.0380279	0.673913
								RASGRP4	63.8386	-1.18905	0.575466	-2.06624	0.0388055	0.678034
								TMC3	35.9609	-1.17968	0.597217	-1.9753	0.0482346	0.735071
								CHAD	147.594	-1.17619	0.463829	-2.53582	0.0112184	0.420238
								LOC101927897	90.3915	-1.17316	0.457295	-2.56544	0.0103045	0.405456
								CAV2	52.5243	-1.17177	0.526471	-2.22571	0.0260335	0.58408
								MSLNL	142.812	-1.1709	0.491731	-2.38119	0.0172569	0.508617
								CRYBG1	63.7656	-1.16702	0.564215	-2.06839	0.0386035	0.676654
								MARVELD3	80.9915	-1.16574	0.471308	-2.47341	0.0133829	0.455951
								SLC27A1	115.694	-1.16196	0.511036	-2.27374	0.0229819	0.55662
								CLDN22	70.1088	-1.15968	0.493054	-2.35204	0.0186708	0.526888
								ASB14	156.692	-1.15881	0.36102	-3.20981	0.00132823	0.135299
								SPAG8	56.087	-1.15854	0.543431	-2.1319	0.0330148	0.642723
								ZNF646	209.164	-1.15505	0.511616	-2.25765	0.0239676	0.570035
								MTMR10	214.768	-1.15452	0.517991	-2.22884	0.0258246	0.583651
								TRAPPC14	53.0245	-1.14468	0.549593	-2.08279	0.0372707	0.671538
								FAM184B	131.027	-1.12797	0.572495	-1.97027	0.0488077	0.736556
								KCNH3	70.956	-1.12548	0.557561	-2.01858	0.0435311	0.708486
								IL3RA	89.924	-1.12405	0.46526	-2.41595	0.015694	0.489454
								RASSF3	38.3639	-1.12138	0.513071	-2.18562	0.0288435	0.612332
								AGER	41.3862	-1.10982	0.519081	-2.13804	0.0325136	0.641572
								SERHL2	191.303	-1.10976	0.495707	-2.23874	0.0251731	0.580886
								FBP2	48.2477	-1.09872	0.550605	-1.99547	0.0459913	0.721732
								ST3GAL6	36.535	-1.09849	0.534872	-2.05374	0.0400006	0.685745
								CCDC183-AS1	44.7409	-1.0943	0.528426	-2.07088	0.0383704	0.674116
								BOP1	302.817	-1.07605	0.337305	-3.19013	0.0014221	0.141146
								ZNHIT2	44.2176	-1.06865	0.520594	-2.05275	0.0400965	0.685745
								CLDND1	88.4677	-1.06758	0.499913	-2.13553	0.0327175	0.641572
								CDIP1	55.0954	-1.06646	0.457556	-2.33078	0.019765	0.536622
								ANKRD42-DT	110.898	-1.05504	0.408009	-2.58583	0.00971436	0.396314
								ZNF330	37.0222	-1.05347	0.521001	-2.02201	0.0431749	0.705159
								GGA3	307.141	-1.04989	0.498187	-2.10742	0.0350808	0.659184
								B4GALT1-AS1	87.2018	-1.04329	0.440878	-2.3664	0.017962	0.519512
								CCDC78	83.6442	-1.02845	0.457315	-2.2489	0.024519	0.576471
								CPZ	180.754	-1.02591	0.492312	-2.08386	0.0371726	0.671459
								SOX4	90.5839	-1.0243	0.443822	-2.3079	0.0210049	0.543856
								CFAP126	273.534	-1.01773	0.379664	-2.6806	0.00734908	0.346915
								KBTBD4	175.681	-1.01543	0.515932	-1.96814	0.0490515	0.737818
								RAPH1	84.5161	-1.01274	0.501856	-2.01798	0.0435936	0.709006
								LTA4H	134.124	-1.00797	0.495629	-2.03372	0.0419795	0.696514
								SMAD1-AS1	138.773	-1.00732	0.379532	-2.65411	0.00795177	0.357284
								SAMD3	255.876	-0.985211	0.345633	-2.85046	0.00436566	0.268946
								NLRC3	90.3791	-0.979753	0.468548	-2.09104	0.0365245	0.66758
								HDAC5	87.938	-0.974777	0.402588	-2.42127	0.0154662	0.485409
								WASHC5-AS1	215.482	-0.974585	0.445372	-2.18825	0.0286514	0.610486
								IPO9-AS1	250.052	-0.944084	0.418063	-2.25824	0.0239309	0.570035
								LOC107985367	110.873	-0.931542	0.437314	-2.13014	0.0331597	0.643671
								NDUFA2	97.7296	-0.929271	0.428636	-2.16797	0.0301608	0.616678
								MMS19	254.752	-0.909018	0.36727	-2.47507	0.013321	0.455951
								RBM5-AS1	168.102	-0.908749	0.395947	-2.29513	0.0217258	0.547858
								SARS1	149.394	-0.88625	0.409422	-2.16463	0.0304157	0.618278
								LOC107984328	309.837	-0.879891	0.426209	-2.06446	0.0389742	0.678034
								POLG	450.298	-0.877223	0.442816	-1.98101	0.0475903	0.731123
								SPDYE3	233.981	-0.851907	0.416954	-2.04317	0.0410356	0.69036
								CIRBP	253.773	-0.842633	0.366371	-2.29994	0.0214514	0.547752
								LOC107987244	227.613	-0.824293	0.399274	-2.06448	0.0389725	0.678034
								LOC107985873	158.478	-0.817123	0.414195	-1.9728	0.0485186	0.735729
								RPL4	590.964	-0.694565	0.336318	-2.06521	0.0389036	0.678034
								TUBB	405.963	0.741255	0.339297	2.18468	0.0289125	0.613236
								P4HB	618.268	0.794446	0.371714	2.13725	0.0325776	0.641572
								SOX9	114.17	0.808782	0.408712	1.97885	0.0478324	0.732789
								AP2M1	228.758	0.846158	0.405244	2.08802	0.0367958	0.667643
								DNAJA1	212.705	0.848614	0.404639	2.09721	0.035975	0.664165
								PPIB	318.894	0.854201	0.413458	2.06599	0.0388294	0.678034
								CAPNS1	86.0848	0.90714	0.432879	2.0956	0.036118	0.665087
								FTL	130.155	0.911887	0.412586	2.21017	0.0270932	0.596199
								VCP	199.215	0.915955	0.433997	2.11051	0.0348145	0.655814
								PSMD14	87.3596	0.922764	0.453263	2.03582	0.041768	0.695883
								CANX	563.345	0.923201	0.317936	2.90373	0.00368745	0.246897
								EPN1	78.4068	0.92857	0.471045	1.9713	0.0486896	0.735729
								COPG1	208.067	0.929032	0.371699	2.49942	0.0124397	0.443797
								GNB1	171.061	0.941253	0.39185	2.40207	0.0163024	0.494708
								TUBA1B	361.669	0.958215	0.375822	2.54965	0.010783	0.411225
								ATP2A2	238.36	0.974098	0.433383	2.24766	0.0245978	0.576471
								CUL4B	74.8153	0.978518	0.489703	1.99819	0.0456961	0.721477
								PFN2	64.0102	0.985158	0.479125	2.05616	0.0397671	0.683722

## Sheet: Table S4
Supplementary Table S4. DEGs in HCT116 Control vs HCT116 Cisplatin 30M
UpregulatedGenes	baseMean	log2FoldChange	lfcSE	stat	pvalue	padj		DownregulatedGenes	baseMean	log2FoldChange	lfcSE	stat	pvalue	padj
KRT8P45	19.4802	9.29306	2.30876	4.02514	5.6942e-05	0.553754		DST	415.286	-9.97363	2.82303	-3.53296	0.000410938	0.860878
LOC107987134	50.2309	8.78122	2.03229	4.32085	1.55427e-05	0.358166		CENPF	188.874	-8.8388	2.81412	-3.14088	0.00168441	0.99579
ACE3P	12.7371	8.68008	2.43905	3.55879	0.000372562	0.858533		OR51Q1	158.657	-8.5883	2.73456	-3.14066	0.00168569	0.99579
LOC105372385	10.4893	8.39997	2.51661	3.33781	0.000844412	0.99579		H1-4	151.465	-8.52075	2.90715	-2.93096	0.00337915	0.99579
GCAWKR	8.99087	8.17757	2.5878	3.16004	0.00157745	0.99579		OR51M1	150.187	-8.50994	2.57288	-3.30755	0.000941156	0.99579
EGFLAM	16.5595	8.13302	2.13023	3.81791	0.000134586	0.553754		USP34	137.883	-8.38704	2.60306	-3.22199	0.00127301	0.99579
AKR1B10	7.49239	7.91454	2.68411	2.94867	0.00319147	0.99579		BPTF	130.978	-8.31311	2.63616	-3.15349	0.00161329	0.99579
IGHG1	7.49239	7.91454	2.68411	2.94867	0.00319147	0.99579		TTN-AS1	124.037	-8.23346	2.88741	-2.8515	0.0043513	0.99579
LOC102723480	6.74315	7.76253	2.74649	2.82634	0.00470828	0.99579		VPS13A	123.626	-8.22911	2.81472	-2.9236	0.00346008	0.99579
L1CAM-AS1	5.99391	7.59261	2.82235	2.69017	0.00714146	0.99579		NFAT5	122.174	-8.21319	2.61286	-3.14337	0.00167013	0.99579
LOC105369980	5.99391	7.59261	2.82235	2.69017	0.00714146	0.99579		H2BC21	121.336	-8.20078	3.0934	-2.65106	0.00802397	0.99579
ZNF114-AS1	11.3148	7.57834	2.2405	3.38243	0.000718469	0.99579		PHLDB2	118.184	-8.16531	2.65718	-3.07293	0.0021197	0.99579
DNAJB6P3	5.24467	7.39996	2.91713	2.53672	0.0111895	0.99579		GP6	117.925	-8.16178	2.72953	-2.99018	0.00278817	0.99579
SLC26A9-AS1	5.24467	7.39996	2.91713	2.53672	0.0111895	0.99579		H2BC18	104.138	-7.98096	3.07914	-2.59194	0.0095436	0.99579
LOC105379506	4.49544	7.17756	3.03846	2.36224	0.018165	0.99579		MED13L	98.0962	-7.89789	2.63709	-2.99493	0.00274509	0.99579
LOC107984689	4.49544	7.17756	3.03846	2.36224	0.018165	0.99579		SCUBE3	97.2004	-7.88463	2.65482	-2.96993	0.00297867	0.99579
PRG1	4.49544	7.17756	3.03846	2.36224	0.018165	0.99579		KIAA1109	93.8263	-7.83362	2.70359	-2.89749	0.00376158	0.99579
TMEM11-DT	11.1943	7.1361	2.63683	2.70632	0.0068034	0.99579		H4C5	88.5295	-7.74754	3.06475	-2.52795	0.0114729	0.99579
HEATR6-DT	309.742	7.10329	2.78237	2.55297	0.010681	0.99579		SMCHD1	85.681	-7.7027	2.77743	-2.77333	0.00554865	0.99579
LOC648987	33.6271	7.0328	2.53055	2.77916	0.00544996	0.99579		SMC1A	85.4215	-7.69947	2.57003	-2.99587	0.0027366	0.99579
RPL12P14	40.536	6.9996	1.95731	3.57614	0.000348705	0.858533		HECTD1	85.3322	-7.69724	2.72905	-2.82048	0.00479517	0.99579
ARPIN	3.7462	6.91452	3.19998	2.1608	0.0307107	0.99579		ATRX	83.4328	-7.66544	2.66374	-2.87769	0.00400593	0.99579
C2CD4D-AS1	3.7462	6.91452	3.19998	2.1608	0.0307107	0.99579		LRRC4	81.2723	-7.62695	2.77337	-2.75007	0.00595834	0.99579
CNGB1	3.7462	6.91452	3.19998	2.1608	0.0307107	0.99579		OSBPL8	78.4676	-7.57659	2.77015	-2.73508	0.00623649	0.99579
KCNK15	3.7462	6.91452	3.19998	2.1608	0.0307107	0.99579		OR51B6	78.0306	-7.56956	2.63084	-2.87724	0.00401168	0.99579
LINC00242	3.7462	6.91452	3.19998	2.1608	0.0307107	0.99579		COL10A1	78.0158	-7.56761	2.84357	-2.66131	0.00778384	0.99579
LINC00592	3.7462	6.91452	3.19998	2.1608	0.0307107	0.99579		PDZD8	75.3062	-7.51835	2.67982	-2.80554	0.00502321	0.99579
LOC107985492	3.7462	6.91452	3.19998	2.1608	0.0307107	0.99579		STIL	74.794	-7.50538	3.05037	-2.46048	0.0138751	0.99579
LOC112268047	3.7462	6.91452	3.19998	2.1608	0.0307107	0.99579		H2BC4	72.5951	-7.46435	2.83685	-2.63121	0.00850818	0.99579
NPY4R	3.7462	6.91452	3.19998	2.1608	0.0307107	0.99579		H2AC20	71.7247	-7.44523	3.04756	-2.44301	0.0145652	0.99579
RPS8P5	3.7462	6.91452	3.19998	2.1608	0.0307107	0.99579		CDHR5	71.4286	-7.4428	2.54954	-2.91927	0.0035085	0.99579
ZNF516-AS1	3.7462	6.91452	3.19998	2.1608	0.0307107	0.99579		H2AC13	68.958	-7.38877	3.04376	-2.42751	0.0152027	0.99579
HES2	10.6551	6.82146	2.04546	3.33493	0.000853222	0.99579		KTN1	68.6795	-7.38639	2.67013	-2.7663	0.00566958	0.99579
RPL7P50	12.033	6.51131	2.28423	2.85055	0.00436442	0.99579		ZFPM2	67.5839	-7.36355	2.63891	-2.79038	0.00526463	0.99579
GRAPL	5.32089	6.47241	2.58891	2.50005	0.0124175	0.99579		LOC105371622	67.4742	-7.33448	2.81983	-2.60104	0.00929414	0.99579
TNFRSF10A-DT	8.4074	6.47123	2.12581	3.04413	0.00233358	0.99579		PCM1	66.1952	-7.3321	2.82867	-2.59207	0.00954004	0.99579
HPN-AS1	5.33422	6.39737	2.58046	2.47916	0.0131693	0.99579		ARHGAP35	64.5676	-7.29809	2.55329	-2.85831	0.0042591	0.99579
LOC107987107	5.33422	6.39737	2.58046	2.47916	0.0131693	0.99579		RAD50	64.3926	-7.29384	2.7004	-2.70102	0.00691275	0.99579
LNCOC1	86.2306	6.3098	1.5919	3.96369	7.37998e-05	0.553754		SPDYE6	63.859	-7.28141	2.74918	-2.64857	0.00808329	0.99579
IGFL2	4.58498	6.17056	2.67691	2.30511	0.0211605	0.99579		SETD2	63.8306	-7.2808	2.74874	-2.64878	0.00807835	0.99579
SNHG3	4.58498	6.17056	2.67691	2.30511	0.0211605	0.99579		PUM1	63.3559	-7.27006	2.7491	-2.64452	0.00818058	0.99579
LOC107985188	5.94959	6.07026	2.92502	2.07529	0.0379596	0.99579		ZMYM4-AS1	62.9899	-7.26261	2.55048	-2.84755	0.00440577	0.99579
AOX3P	3.83574	5.90203	2.80441	2.10456	0.0353299	0.99579		VCAN	62.518	-7.25024	2.82401	-2.56735	0.0102478	0.99579
FAM228B	1182.79	5.89928	1.74505	3.38057	0.000723353	0.99579		C11orf65	62.1136	-7.24276	2.58412	-2.80279	0.00506623	0.99579
LOC105371380	43.5339	5.67667	2.02072	2.80924	0.00496593	0.99579		PRR14L	60.9118	-7.21381	2.7452	-2.62779	0.00859424	0.99579
CORO1A-AS1	58.7373	5.59284	1.55937	3.58661	0.000335004	0.858533		TTC3	59.6445	-7.18451	2.65558	-2.70544	0.00682139	0.99579
FSIP1	16.5604	5.53164	2.07948	2.66011	0.00781151	0.99579		ADGRG6	57.2684	-7.12633	2.65158	-2.68758	0.00719727	0.99579
AQP3	10.7137	5.46904	2.22413	2.45896	0.0139342	0.99579		ASPM	57.3354	-7.124	3.02937	-2.35165	0.0186905	0.99579
LOC102723716	3.91196	5.324	2.50417	2.12605	0.0334991	0.99579		CDC42BPB	56.531	-7.10792	2.62041	-2.71252	0.00667738	0.99579
CDKN1A	224.419	5.12288	1.35755	3.77363	0.000160892	0.553754		CC2D2A	56.4281	-7.10525	2.57428	-2.76009	0.00577852	0.99579
IFI6	7.97635	5.11954	2.05131	2.49574	0.0125695	0.99579		HERC2	56.3919	-7.10439	2.6202	-2.71139	0.00670008	0.99579
FAM86JP	25.6308	5.09625	1.57035	3.24529	0.00117332	0.99579		DOCK5	55.99	-7.09375	2.68665	-2.64037	0.00828148	0.99579
KRT15	8.01635	5.05118	2.16794	2.32994	0.0198092	0.99579		RIF1	55.8301	-7.08824	2.81393	-2.51898	0.0117694	0.99579
TMSB4XP6	10.1035	5.00161	1.88123	2.65869	0.00784454	0.99579		PHIP	55.628	-7.0848	2.57412	-2.75232	0.00591743	0.99579
PRR29	9.30473	4.94341	2.2713	2.17646	0.0295206	0.99579		PKDREJ	54.1971	-7.04751	2.64639	-2.66307	0.00774319	0.99579
PSCA	8.54216	4.89143	2.02954	2.41011	0.0159476	0.99579		KAT6A	53.7131	-7.03438	2.55402	-2.75424	0.00588289	0.99579
SFN	311.49	4.89079	1.26998	3.85108	0.000117599	0.553754		MPP7	53.5356	-7.02935	2.53372	-2.77432	0.00553177	0.99579
KRT18P12	7.35665	4.7121	2.22512	2.11768	0.0342019	0.99579		MKI67	585.777	-7.02328	2.05684	-3.4146	0.000638761	0.99579
APOBEC3B-AS1	478.657	4.6526	1.32585	3.50913	0.00044957	0.863324		MASP2	52.8266	-7.00972	2.51971	-2.78195	0.00540337	0.99579
PRRG2	12.244	4.64451	2.01823	2.30128	0.0213757	0.99579		BOD1L1	52.7777	-7.00956	2.64428	-2.65084	0.00802929	0.99579
HOXB13	6.2049	4.63342	2.17631	2.12902	0.0332524	0.99579		CEP350	52.6197	-7.00354	2.80908	-2.49318	0.0126605	0.99579
PHLDA3	20.2052	4.59063	1.56962	2.92468	0.00344811	0.99579		BTAF1	52.4594	-7.00062	2.68055	-2.61164	0.00901098	0.99579
DYNLT4	348.826	4.55449	1.3937	3.26791	0.00108343	0.99579		H2AC11	51.8157	-6.97893	3.02206	-2.30933	0.0209255	0.99579
BLCAP	9.53338	4.49864	1.84511	2.43815	0.0147626	0.99579		PTPRG-AS1	50.426	-6.94108	2.48242	-2.79609	0.00517246	0.99579
NR4A1AS	451.052	4.48803	1.65594	2.71027	0.00672286	0.99579		FAT1	1095.26	-6.92534	1.84061	-3.76252	0.000168212	0.553754
ANXA2P2	13.2219	4.46258	1.81339	2.4609	0.0138588	0.99579		MEF2C-AS2	49.1383	-6.90712	2.67502	-2.58208	0.00982082	0.99579
TMEM40	6.26778	4.42176	2.13262	2.0734	0.0381355	0.99579		FKBP5	49.2616	-6.90562	2.46249	-2.80432	0.00504223	0.99579
LOC105371573	5.81818	4.41162	2.16881	2.03412	0.0419394	0.99579		UGGT1	49.0962	-6.90397	2.50028	-2.76129	0.00575744	0.99579
WNT7B	9.58294	4.40181	1.86356	2.36205	0.0181744	0.99579		OR52D1	266.697	-6.88938	2.25181	-3.05948	0.00221718	0.99579
HSD17B1-AS1	58.175	4.3842	1.33147	3.29274	0.000992148	0.99579		ADAM10	48.4979	-6.88697	2.51092	-2.7428	0.00609171	0.99579
SERPINE1	29.578	4.34171	1.47108	2.95138	0.0031636	0.99579		CYP2A6	48.397	-6.88531	2.5593	-2.69031	0.00713856	0.99579
VSIR	5.90773	4.23717	2.15377	1.96732	0.049146	0.99579		EP300	48.1801	-6.87852	2.72325	-2.52585	0.011542	0.99579
LOC107984690	266.834	4.2274	1.54966	2.72795	0.00637297	0.99579		MDC1	47.8981	-6.87089	2.63494	-2.60761	0.00911779	0.99579
MIR3918	341.412	4.12697	1.43425	2.87745	0.00400906	0.99579		H2BC17	47.9669	-6.86838	3.01678	-2.27673	0.0228026	0.99579
LOC100310756	10.9475	4.12428	1.97793	2.08515	0.0370557	0.99579		SLC38A4	47.6047	-6.86188	2.67168	-2.56837	0.0102177	0.99579
CYP4F11	8.56319	4.12252	1.96186	2.10133	0.0356123	0.99579		ARHGEF10	47.0177	-6.84435	2.63267	-2.59977	0.00932857	0.99579
NR4A1	8.08446	4.10654	1.92153	2.13712	0.0325883	0.99579		ERBIN	46.9111	-6.84112	2.63245	-2.59877	0.00935587	0.99579
NME1	50.9905	4.09066	1.67146	2.44736	0.0143908	0.99579		CDC42BPA	46.2367	-6.82048	2.63081	-2.59254	0.00952701	0.99579
SERTAD1	24.2209	4.05268	1.567	2.58627	0.00970199	0.99579		ZBED6	46.1261	-6.81229	3.01606	-2.25867	0.0239037	0.99579
TP53I3	40.9906	4.03238	1.40096	2.8783	0.0039983	0.99579		ICE1	44.7047	-6.77209	2.66594	-2.54023	0.011078	0.99579
RPS10P19	17.9494	4.03141	1.5585	2.58672	0.00968931	0.99579		MIR4253	44.8732	-6.76091	2.43993	-2.77094	0.0055894	0.99579
OVOL1	22.6291	3.98807	1.5375	2.59386	0.00949047	0.99579		ESYT3	43.8283	-6.74329	2.71559	-2.48318	0.0130217	0.99579
IMPDH1P10	40.8661	3.93669	1.47091	2.67637	0.00744255	0.99579		OR51I2	239.663	-6.73499	2.27183	-2.96457	0.00303106	0.99579
RNF157	43.6663	3.93074	1.51713	2.59091	0.0095722	0.99579		RIC1	43.5517	-6.73365	2.53124	-2.66021	0.00780915	0.99579
C16orf96	35.4504	3.92709	1.49442	2.62783	0.00859315	0.99579		GPR179	43.5883	-6.73136	3.01078	-2.23575	0.0253683	0.99579
RHOD	22.5111	3.91924	1.47871	2.65045	0.00803857	0.99579		PTPRG	43.4187	-6.73059	2.62733	-2.56176	0.0104144	0.99579
FAS	149.82	3.90888	1.34319	2.91016	0.00361246	0.99579		ARID2	43.3807	-6.72761	2.79388	-2.40798	0.0160409	0.99579
SELENOK	10.3145	3.89527	1.84869	2.10704	0.0351139	0.99579		ACSL3	43.264	-6.72346	2.51627	-2.67199	0.00754033	0.99579
TUSC2	13.8716	3.84085	1.65215	2.32476	0.0200848	0.99579		MAGI1	43.1843	-6.72286	2.62545	-2.56065	0.0104475	0.99579
DRAM1	15.9359	3.81726	1.69795	2.24815	0.0245663	0.99579		TAOK1	42.828	-6.71087	2.66225	-2.52075	0.0117105	0.99579
MOV10	8318.33	3.80007	1.70213	2.23254	0.0255796	0.99579		ROCK2	42.6738	-6.70572	2.6641	-2.51707	0.0118336	0.99579
FAM86GP	12.1712	3.79018	1.75595	2.15848	0.0308909	0.99579		ABCC1	42.6394	-6.70296	2.79294	-2.39997	0.0163966	0.99579
CNBD2	13.9612	3.77583	1.63648	2.30729	0.0210386	0.99579		MAB21L2	42.71	-6.70223	3.00964	-2.22692	0.0259524	0.99579
IGFBP6	13.3167	3.77201	1.88722	1.99872	0.045639	0.99579		ZNF644	42.4792	-6.69895	2.56871	-2.60791	0.00910978	0.99579
SMIM19	24.4567	3.74774	1.66776	2.24717	0.024629	0.99579		ECPAS	42.2371	-6.68966	2.53085	-2.64325	0.00821143	0.99579
YIF1B	1770.9	3.74715	1.69847	2.20619	0.0273704	0.99579		ZNF217	42.1632	-6.68698	2.79223	-2.39485	0.0166271	0.99579
AK1	15.4807	3.74562	1.59319	2.35102	0.0187221	0.99579		RBM33	42.1056	-6.68627	2.56773	-2.60397	0.00921518	0.99579
MSX1	46.3614	3.7434	1.41583	2.64396	0.00819422	0.99579		RFC1	41.4769	-6.66427	2.54545	-2.6181	0.00884196	0.99579
EID2	15.2864	3.72121	1.797	2.07078	0.0383789	0.99579		TMEM14EP	41.3401	-6.65993	2.71094	-2.45669	0.0140223	0.99579
ISG15	30.0293	3.69072	1.74542	2.11452	0.0344708	0.99579		DNAH10	41.046	-6.64451	2.47784	-2.68157	0.00732775	0.99579
KRT7-AS	148.904	3.68849	1.24466	2.96345	0.0030421	0.99579		TOPBP1	40.799	-6.64114	2.71089	-2.4498	0.0142938	0.99579
DNAJC17	164.838	3.664	1.5385	2.38154	0.0172406	0.99579		H4C4	40.784	-6.63626	3.00973	-2.20494	0.0274586	0.99579
FDXR	44.3772	3.64943	1.36212	2.67923	0.00737926	0.99579		ATP2B1	40.6937	-6.63436	2.49848	-2.65535	0.0079225	0.99579
FKBP15	257.071	3.6458	1.37983	2.64221	0.00823673	0.99579		KNTC1	40.5111	-6.63148	2.65758	-2.49531	0.0125847	0.99579
BTG2	23.7684	3.60687	1.51682	2.37791	0.0174109	0.99579		H2BC15	40.637	-6.63109	3.0064	-2.20566	0.0274078	0.99579
ELF3-AS1	32.2778	3.57464	1.45866	2.45063	0.0142605	0.99579		RAPH1	40.6249	-6.62957	2.47751	-2.6759	0.00745278	0.99579
ACTA2-AS1	458.124	3.53647	1.42554	2.4808	0.0131089	0.99579		TANC2	40.5677	-6.6262	2.4686	-2.6842	0.00727044	0.99579
LOC105372707	1948.17	3.53614	1.6641	2.12495	0.0335906	0.99579		COCH	40.2024	-6.62058	2.65697	-2.49178	0.0127105	0.99579
NFKBIB	144.699	3.50515	1.46746	2.38858	0.0169137	0.99579		H2AC17	40.1951	-6.61547	3.00654	-2.20036	0.0277815	0.99579
PSMB8-AS1	1125.31	3.49286	1.75939	1.98526	0.0471151	0.99579		TUT7	40.0445	-6.61493	2.66029	-2.48655	0.012899	0.99579
DYNLT1	34.3899	3.46652	1.40098	2.47436	0.0133477	0.99579		RESF1	39.9628	-6.61042	2.79489	-2.36518	0.0180215	0.99579
ABCC10	51.0212	3.45029	1.36315	2.53111	0.0113702	0.99579		KNL1	39.4461	-6.5919	2.78684	-2.36537	0.0180123	0.99579
CRABP2	168.261	3.39738	1.44335	2.35382	0.0185817	0.99579		FRYL	39.0098	-6.57717	2.70607	-2.43053	0.0150768	0.99579
CLTB	24.4086	3.3911	1.49234	2.27235	0.0230657	0.99579		SLC16A4	38.7866	-6.56876	2.5607	-2.56523	0.0103109	0.99579
LOC105371816	106.081	3.34962	1.28996	2.59668	0.00941286	0.99579		SEMA6A	38.5176	-6.55493	2.49502	-2.62721	0.00860893	0.99579
HES4	14.6909	3.33783	1.62647	2.05219	0.0401513	0.99579		CPS1	38.2896	-6.5506	2.70567	-2.42107	0.0154749	0.99579
GPN2	15.3716	3.33775	1.60561	2.0788	0.0376359	0.99579		H2AC21	38.345	-6.5481	3.00435	-2.17954	0.0292918	0.99579
LOC102725238	332.641	3.32619	1.37601	2.41728	0.0156371	0.99579		MYO5B	37.7406	-6.53012	2.58355	-2.52757	0.0114853	0.99579
CYBA	86.7647	3.30143	1.5004	2.20037	0.027781	0.99579		ARHGAP21	37.5903	-6.5247	2.6171	-2.4931	0.0126632	0.99579
PTGES	14.1093	3.28443	1.66313	1.97485	0.0482853	0.99579		CD2AP	37.5046	-6.51641	3.00203	-2.17066	0.0299566	0.99579
NIPAL3	27.6642	3.2761	1.43951	2.27585	0.0228549	0.99579		H2BC11	37.4267	-6.51346	3.00326	-2.16879	0.0300983	0.99579
CCN1	18.4615	3.25418	1.57974	2.05994	0.039404	0.99579		ATP13A3	37.2089	-6.50754	2.52002	-2.58233	0.00981345	0.99579
SYVN1	123.976	3.25258	1.57969	2.059	0.0394947	0.99579		LOC105369149	37.2048	-6.50189	2.47267	-2.6295	0.008551	0.99579
ABCB9	56.075	3.24037	1.62058	1.99951	0.0455534	0.99579		H4C3	37.0778	-6.50002	3.002	-2.16523	0.0303699	0.99579
SERPINB5	13.6941	3.22812	1.62657	1.98462	0.0471863	0.99579		WDFY3	36.8224	-6.49488	2.70153	-2.40415	0.0162103	0.99579
DEAF1	82.2657	3.18927	1.38689	2.29958	0.0214721	0.99579		SLMAP	36.6642	-6.4891	2.61146	-2.48486	0.0129603	0.99579
CMBL	26.103	3.13408	1.44934	2.16242	0.0305862	0.99579		ALMS1	36.63	-6.48741	2.70116	-2.40171	0.0163185	0.99579
NELFE	87.1051	3.13067	1.36771	2.28898	0.0220805	0.99579		TUT4	36.5138	-6.48289	2.70099	-2.40019	0.0163865	0.99579
RARA	105.581	3.12323	1.57901	1.97796	0.047933	0.99579		RRP1B	36.346	-6.47665	2.61078	-2.48074	0.0131111	0.99579
LOC729867	179.229	3.11812	1.46304	2.13126	0.0330674	0.99579		CHD6	36.0127	-6.46321	2.70038	-2.39344	0.0166912	0.99579
ERCC2	747.166	3.10842	1.56842	1.98187	0.0474933	0.99579		FMNL2	35.9611	-6.4611	2.70017	-2.39285	0.016718	0.99579
LOC107985361	277.606	3.10759	1.56044	1.99148	0.0464283	0.99579		UTP20	35.7765	-6.45382	2.70142	-2.38905	0.016892	0.99579
GRHPR	318.54	3.09827	1.56556	1.97902	0.0478134	0.99579		GATAD2A	35.786	-6.45305	2.7802	-2.32107	0.0202828	0.99579
SLC29A2	59.2675	3.09128	1.37549	2.2474	0.0246142	0.99579		ANXA10	35.5115	-6.44203	2.78006	-2.31723	0.0204915	0.99579
CD68	53.5868	3.07217	1.52948	2.00865	0.0445748	0.99579		ZNF721	35.5421	-6.43962	2.99937	-2.14699	0.0317943	0.99579
C11orf68	44.009	3.04329	1.33255	2.2838	0.0223831	0.99579		ARID1B	35.2904	-6.43416	2.57812	-2.49568	0.0125716	0.99579
MYL9	33.8131	3.01991	1.37741	2.19246	0.0283465	0.99579		GPR18	35.1532	-6.42861	2.70035	-2.38066	0.0172815	0.99579
SZT2	447.686	2.97894	1.51038	1.97232	0.0485732	0.99579		DHX40	34.9245	-6.41851	2.55287	-2.51423	0.0119293	0.99579
RHOC	115.665	2.96859	1.35979	2.18311	0.0290274	0.99579		AMT	34.8788	-6.4174	2.57758	-2.4897	0.0127851	0.99579
DYNLRB1	70.2783	2.95468	1.41614	2.08643	0.0369399	0.99579		ERVFRD-1	34.7799	-6.41379	2.60904	-2.45829	0.0139598	0.99579
ELOVL1	21.0797	2.94488	1.48047	1.98915	0.0466846	0.99579		APC	34.8907	-6.41323	2.99985	-2.13785	0.0325292	0.99579
ACP2	35.7055	2.90504	1.35684	2.14103	0.0322718	0.99579		PDE4B	34.6235	-6.40689	2.57711	-2.48607	0.0129161	0.99579
BANF1	159.168	2.90278	1.3502	2.14989	0.0315641	0.99579		NUTM2D	34.7075	-6.40564	2.999	-2.13593	0.0326852	0.99579
GAMT	35.0343	2.87343	1.36569	2.10402	0.0353765	0.99579		PRSS48	34.5226	-6.4029	2.69762	-2.37354	0.0176185	0.99579
GEMIN7	128.85	2.82005	1.43189	1.96946	0.0489004	0.99579		RBBP8	34.1929	-6.38957	2.64487	-2.41584	0.015699	0.99579
GIPC1	38.7129	2.81213	1.35388	2.07709	0.0377933	0.99579		MSI2	34.065	-6.37895	2.50047	-2.5511	0.0107385	0.99579
PDLIM1	44.292	2.77147	1.32993	2.08391	0.0371681	0.99579		HNRNPA0	33.7965	-6.36897	2.51851	-2.52886	0.0114433	0.99579
FLNC-AS1	363.901	2.76689	1.20207	2.30178	0.0213478	0.99579		NECTIN3	33.6292	-6.36062	2.9968	-2.12247	0.0337981	0.99579
GPX1	67.3974	2.74845	1.2933	2.12514	0.033575	0.99579		CHD9	33.3127	-6.34701	2.99929	-2.11617	0.0343303	0.99579
EPS8L2	72.5349	2.72532	1.3786	1.97688	0.0480552	0.99579		FNDC3B	33.0861	-6.34243	2.69399	-2.35429	0.0185582	0.99579
GSTP1	63.0129	2.69275	1.36839	1.96782	0.0490893	0.99579		ANKRD61	32.9618	-6.33425	2.53055	-2.50312	0.0123105	0.99579
RPL35	170.587	2.67903	1.21948	2.19686	0.0280303	0.99579		ANKIB1	32.8976	-6.33317	2.77557	-2.28176	0.0225037	0.99579
ARVCF	34.117	2.67429	1.36232	1.96303	0.0496425	0.99579		CEP192	32.8383	-6.32656	2.99784	-2.11038	0.034826	0.99579
HSPB1	88.1044	2.62711	1.26541	2.07609	0.0378852	0.99579		RABGAP1L	32.6269	-6.32281	2.64157	-2.39358	0.0166848	0.99579
								ARHGAP26	32.5658	-6.31988	2.60345	-2.4275	0.0152035	0.99579
								SYNE2	179.564	-6.31752	2.39289	-2.64012	0.00828766	0.99579
								REST	32.4001	-6.31258	2.6926	-2.34442	0.0190569	0.99579
								TRPM7	32.2722	-6.30527	2.54772	-2.47486	0.0133287	0.99579
								DLD	32.4509	-6.30245	2.47078	-2.5508	0.0107476	0.99579
								LCOR	31.9201	-6.29021	2.77315	-2.26826	0.0233134	0.99579
								H2AC6	31.964	-6.28817	2.99504	-2.09953	0.0357704	0.99579
								MBNL2	31.7942	-6.28563	2.69209	-2.33485	0.0195514	0.99579
								VCPIP1	31.7637	-6.28427	2.60154	-2.4156	0.0157093	0.99579
								TMEM131	31.6514	-6.27819	2.77276	-2.26424	0.0235594	0.99579
								ARHGAP32	31.8602	-6.27759	2.48368	-2.52753	0.0114868	0.99579
								LRRN3	31.5886	-6.27535	2.77256	-2.26338	0.0236122	0.99579
								HIPK2	31.4665	-6.27119	2.63921	-2.37616	0.0174937	0.99579
								XYLT1	32.5882	-6.26947	2.87791	-2.17848	0.0293703	0.99579
								GPATCH8	31.4303	-6.26816	2.77232	-2.26098	0.0237606	0.99579
								CRYBG1	31.4967	-6.26735	2.51156	-2.4954	0.0125816	0.99579
								FNBP4	31.356	-6.26592	2.69054	-2.32887	0.0198659	0.99579
								H2AC14	31.0265	-6.24568	2.99339	-2.08649	0.0369343	0.99579
								CASP8AP2	30.939	-6.24167	2.99508	-2.08398	0.0371624	0.99579
								OPA1	30.7861	-6.23972	2.64129	-2.36237	0.0181583	0.99579
								FSIP2	30.7749	-6.23934	2.68969	-2.31972	0.0203558	0.99579
								HMGA2	30.7916	-6.23459	2.50925	-2.48464	0.0129681	0.99579
								RHOBTB3	30.8297	-6.23442	2.49628	-2.49749	0.0125077	0.99579
								TNKS	30.5196	-6.22748	2.68924	-2.3157	0.0205745	0.99579
								PIKFYVE	30.5825	-6.22511	2.99288	-2.07997	0.0375282	0.99579
								NEO1	30.4606	-6.21937	2.99333	-2.07774	0.0377331	0.99579
								RLF	30.453	-6.21907	2.99271	-2.07807	0.037703	0.99579
								PTPN13	30.1481	-6.21005	2.68876	-2.30964	0.0209083	0.99579
								AGPAT5	30.0737	-6.20665	2.63724	-2.35347	0.0185993	0.99579
								LRRTM2	30.1768	-6.20609	2.99353	-2.07317	0.0381563	0.99579
								H2BC7	29.9653	-6.19605	2.99237	-2.07062	0.0383945	0.99579
								TANC1	29.6488	-6.18622	2.68707	-2.30222	0.021323	0.99579
								ZNF518B	29.4222	-6.17536	2.68721	-2.29806	0.0215586	0.99579
								SLC39A10	29.3574	-6.17112	2.76859	-2.22898	0.0258154	0.99579
								ASB18	28.8618	-6.14798	2.63333	-2.33468	0.0195604	0.99579
								SEC23A	28.7246	-6.14059	2.59455	-2.36673	0.0179462	0.99579
								TAC4	28.6484	-6.13679	2.59443	-2.36537	0.0180118	0.99579
								ZMYND11	28.4923	-6.12966	2.63444	-2.32674	0.019979	0.99579
								NRIP1	28.5934	-6.12922	2.99054	-2.04953	0.0404099	0.99579
								UBR3	28.4542	-6.12776	2.68508	-2.28216	0.0224801	0.99579
								KIAA1671	28.441	-6.1216	2.99041	-2.04708	0.0406506	0.99579
								LOC107986578	29.2664	-6.11914	2.54603	-2.40341	0.0162431	0.99579
								PIK3C2A	28.1836	-6.11408	2.68426	-2.27775	0.0227413	0.99579
								BRWD3	28.1608	-6.11298	2.63385	-2.32093	0.0202907	0.99579
								LHX4	28.1817	-6.11291	2.76676	-2.20941	0.0271459	0.99579
								USP25	27.9854	-6.10393	2.68545	-2.27296	0.0230284	0.99579
								NEK9	28.1906	-6.09557	2.47419	-2.46366	0.0137525	0.99579
								RASGRP1	27.7204	-6.0897	2.5931	-2.34842	0.0188533	0.99579
								KIDINS220	27.7187	-6.08969	2.59482	-2.34687	0.0189321	0.99579
								JMJD1C-AS1	27.9106	-6.08948	2.49881	-2.43695	0.0148117	0.99579
								SEC24B	27.6958	-6.08926	2.68364	-2.26903	0.0232666	0.99579
								RICTOR	27.7679	-6.08492	2.50604	-2.4281	0.0151782	0.99579
								H2AC12	27.7017	-6.08407	2.98971	-2.035	0.0418505	0.99579
								ZNF587	27.5093	-6.07414	2.9895	-2.03183	0.0421713	0.99579
								KIAA0232	27.3395	-6.0708	2.63028	-2.30805	0.0209966	0.99579
								USP45	27.3318	-6.06962	2.59176	-2.34189	0.0191864	0.99579
								DDX18	27.5011	-6.06824	2.49484	-2.43231	0.0150027	0.99579
								LRP6	27.1108	-6.05664	2.56465	-2.36159	0.018197	0.99579
								KATNAL2	27.2742	-6.05578	2.49996	-2.42235	0.0154203	0.99579
								CCDC39	27.0153	-6.04962	2.5399	-2.38183	0.0172266	0.99579
								APPL2	26.9222	-6.04665	2.56309	-2.35912	0.0183181	0.99579
								EVI2B	26.8956	-6.04648	2.76497	-2.18681	0.0287561	0.99579
								TGFBR2	26.7813	-6.03581	2.99119	-2.01787	0.0436053	0.99579
								ZNF154	26.7848	-6.03513	2.51997	-2.39492	0.0166238	0.99579
								GPER1	26.6194	-6.03191	2.76351	-2.1827	0.0290578	0.99579
								ZBTB20-AS1	147.096	-6.02935	2.36989	-2.54414	0.0109546	0.99579
								DMXL1	26.6646	-6.02591	2.50629	-2.40431	0.0162028	0.99579
								OR13H1	26.528	-6.0224	2.98852	-2.01518	0.0438861	0.99579
								UACA	26.2362	-6.00963	2.5612	-2.34641	0.0189552	0.99579
								AQP11	25.9543	-5.99665	2.62738	-2.28237	0.0224676	0.99579
								ERCC6L	25.8895	-5.99329	2.68016	-2.23617	0.0253408	0.99579
								TET2	25.5638	-5.97537	2.67923	-2.23026	0.0257302	0.99579
								MAF	26.568	-5.96734	2.7473	-2.17208	0.0298499	0.99579
								KBTBD7	25.396	-5.96457	2.58817	-2.30456	0.0211915	0.99579
								SPEN	420.978	-5.95819	1.96954	-3.02516	0.00248501	0.99579
								MUC5B	25.2435	-5.95595	2.58793	-2.30144	0.021367	0.99579
								CAMSAP2	25.1598	-5.95268	2.67839	-2.22248	0.0262506	0.99579
								CLDN20	25.1409	-5.95073	2.76107	-2.15522	0.0311443	0.99579
								SPTBN1	139.086	-5.94893	2.27703	-2.61258	0.00898608	0.99579
								TPP2	25.1064	-5.94841	2.76639	-2.15025	0.0315358	0.99579
								CCNL1	25.0358	-5.94513	2.68622	-2.2132	0.0268841	0.99579
								EXPH5	24.918	-5.9381	2.76184	-2.15006	0.0315508	0.99579
								KIF20B	24.9028	-5.93242	2.98792	-1.98547	0.047092	0.99579
								NUTM2A	24.8073	-5.93221	2.62502	-2.25987	0.0238293	0.99579
								RCN2	24.8262	-5.93203	2.58785	-2.29226	0.0218904	0.99579
								ANKRD50	24.8266	-5.92806	2.98781	-1.98408	0.0472465	0.99579
								CENPE	24.6742	-5.91929	2.9876	-1.98129	0.0475589	0.99579
								SS18	24.4911	-5.91397	2.62643	-2.25171	0.0243404	0.99579
								H3C10	24.5693	-5.91316	2.98752	-1.97929	0.0477836	0.99579
								UBR2	24.4455	-5.91172	2.68088	-2.20514	0.0274441	0.99579
								SPIDR	24.4966	-5.91103	2.55815	-2.31067	0.0208512	0.99579
								NCOA2	24.4412	-5.90236	2.51872	-2.34339	0.0191092	0.99579
								NPIPB5	24.2683	-5.90058	2.76076	-2.13731	0.0325731	0.99579
								SPDYE18	24.2204	-5.89809	2.62393	-2.2478	0.0245887	0.99579
								BRCA2	24.1747	-5.89472	2.76458	-2.13223	0.0329882	0.99579
								LOC105376411	24.3135	-5.8915	2.50513	-2.35177	0.0186842	0.99579
								LRBA	132.951	-5.88392	2.24145	-2.62505	0.00866359	0.99579
								RTTN	23.954	-5.87714	2.98949	-1.96593	0.0493064	0.99579
								ROCK1	23.8395	-5.87608	2.677	-2.19503	0.0281617	0.99579
								GNAT2	23.7727	-5.87151	2.62309	-2.2384	0.0251951	0.99579
								MAN2A1	23.7992	-5.87134	2.58928	-2.26756	0.023356	0.99579
								SLC12A2	23.6601	-5.86288	2.59003	-2.26363	0.0235966	0.99579
								IBTK	23.5917	-5.85915	2.58678	-2.26504	0.0235101	0.99579
								FAM186B	23.3269	-5.84507	2.67563	-2.18456	0.0289212	0.99579
								USP47	23.1992	-5.83668	2.62213	-2.22593	0.0260189	0.99579
								TRAPPC9	23.0012	-5.8241	2.63585	-2.20957	0.0271351	0.99579
								DSP	1146.09	-5.81618	1.9309	-3.01216	0.00259395	0.99579
								MEIOC	23.3052	-5.80367	2.49921	-2.3222	0.020222	0.99579
								FMR1	22.6544	-5.8029	2.75727	-2.10458	0.035328	0.99579
								B3GALT2	22.5419	-5.79572	2.62298	-2.20959	0.0271333	0.99579
								KLHL2	22.519	-5.79428	2.62181	-2.21003	0.0271031	0.99579
								VPS35L	22.7435	-5.78959	2.50146	-2.31448	0.0206413	0.99579
								PUS7	22.3552	-5.78464	2.67356	-2.16365	0.0304915	0.99579
								SH3D19	22.0103	-5.76255	2.67298	-2.15586	0.031095	0.99579
								ATF6	22.2386	-5.76074	2.50716	-2.29771	0.0215782	0.99579
								OMG	21.9457	-5.7583	2.67886	-2.14953	0.0315922	0.99579
								ICE2	22.3318	-5.75791	2.49507	-2.30772	0.0210147	0.99579
								HJURP	21.8808	-5.75419	2.67285	-2.15283	0.031332	0.99579
								MDN1	121.347	-5.75231	2.16103	-2.66183	0.00777168	0.99579
								LOC112268060	22.5811	-5.75165	2.51519	-2.28677	0.0222093	0.99579
								PBX2	22.1606	-5.74667	2.53096	-2.27055	0.023174	0.99579
								CPED1	21.6961	-5.74159	2.75643	-2.08298	0.0372534	0.99579
								NBPF12	21.7223	-5.73065	2.51867	-2.27527	0.0228897	0.99579
								SLC6A6	21.7128	-5.72992	2.51915	-2.27455	0.0229331	0.99579
								NBN	21.378	-5.72072	2.68718	-2.12889	0.0332631	0.99579
								PRKDC	357.232	-5.72052	1.80326	-3.17232	0.00151224	0.99579
								COL4A3	21.3529	-5.71833	2.61963	-2.18288	0.0290447	0.99579
								NIPSNAP2	21.7259	-5.71679	2.4991	-2.28754	0.0221642	0.99579
								ZNF131	21.2729	-5.71304	2.61939	-2.18106	0.0291791	0.99579
								SLC30A9	21.2425	-5.71157	2.75547	-2.07281	0.0381898	0.99579
								STRBP	21.3166	-5.71088	2.55543	-2.2348	0.0254305	0.99579
								EPS15	21.2329	-5.71037	2.61967	-2.1798	0.0292721	0.99579
								TMEM131L	21.2272	-5.71022	2.75973	-2.06912	0.038535	0.99579
								ZNF469	21.1986	-5.70903	2.67259	-2.13614	0.0326683	0.99579
								KAT6B	21.208	-5.70824	2.6239	-2.17548	0.0295942	0.99579
								CLASP1	21.1986	-5.70587	2.58269	-2.20927	0.0271556	0.99579
								FEM1B	21.3241	-5.70364	2.5199	-2.26344	0.0236087	0.99579
								SRBD1	21.2576	-5.70295	2.54928	-2.23708	0.0252809	0.99579
								ZNF652	21.0976	-5.70117	2.61924	-2.17665	0.029507	0.99579
								ADD3	21.0863	-5.70114	2.75534	-2.06913	0.0385341	0.99579
								PARM1	21.2061	-5.69971	2.53481	-2.24858	0.0245393	0.99579
								ZCCHC7	21.3069	-5.69779	2.50857	-2.27133	0.0231268	0.99579
								HTR2B	20.8329	-5.68444	2.67193	-2.12747	0.0333811	0.99579
								ACSL4	20.8293	-5.68356	2.76451	-2.0559	0.0397923	0.99579
								TBL1X	20.7908	-5.67799	2.58228	-2.19883	0.0278899	0.99579
								WASHC4	20.6919	-5.67436	2.75484	-2.05978	0.0394194	0.99579
								SLC44A1	20.7279	-5.67364	2.58201	-2.19737	0.0279939	0.99579
								ZNF318	20.6328	-5.67022	2.75517	-2.05803	0.0395873	0.99579
								NUP50	20.5869	-5.66056	2.55715	-2.21362	0.0268547	0.99579
								NUB1	20.4595	-5.65837	2.75513	-2.05376	0.0399992	0.99579
								RUFY1	20.6744	-5.65832	2.52057	-2.24485	0.0247776	0.99579
								GRM3	20.465	-5.65751	2.62044	-2.15899	0.030851	0.99579
								ZNF750	20.4479	-5.65723	2.758	-2.05121	0.0402469	0.99579
								MAL2	20.4973	-5.65709	2.58673	-2.18696	0.0287451	0.99579
								KCNIP4	20.7181	-5.6514	2.50679	-2.25443	0.0241688	0.99579
								AVPR2	20.265	-5.64375	2.61838	-2.15544	0.0311276	0.99579
								EXOC4	20.2269	-5.6424	2.67058	-2.1128	0.034618	0.99579
								CKAP5	111.942	-5.63586	2.11591	-2.66356	0.00773184	0.99579
								RALGAPA1	20.1221	-5.63365	2.61916	-2.15094	0.0314813	0.99579
								DHX29	20.084	-5.63238	2.6703	-2.10927	0.0349215	0.99579
								VPS13B	111.434	-5.62866	2.24907	-2.50265	0.0123266	0.99579
								MACF1	223.222	-5.62741	2.06663	-2.723	0.00646926	0.99579
								THSD4	19.8383	-5.6149	2.67086	-2.10228	0.0355284	0.99579
								SLC9A7	20.8964	-5.61474	2.67097	-2.10214	0.0355412	0.99579
								ZNF281	19.8002	-5.61191	2.75384	-2.03784	0.0415655	0.99579
								CHUK	19.7792	-5.61062	2.66991	-2.10143	0.0356036	0.99579
								FANCD2	19.8019	-5.61046	2.61984	-2.14153	0.0322313	0.99579
								TTYH1	19.9428	-5.61032	2.53631	-2.212	0.0269668	0.99579
								AGO1	19.8761	-5.60924	2.56027	-2.19088	0.0284605	0.99579
								FBXW2	19.8685	-5.60911	2.55469	-2.19562	0.0281194	0.99579
								C2CD3	19.7183	-5.6062	2.67415	-2.09644	0.036043	0.99579
								ANKRD36C	19.6745	-5.60283	2.6806	-2.09014	0.0366052	0.99579
								R3HDM1	19.6076	-5.59798	2.67208	-2.09499	0.0361719	0.99579
								SIPA1L2	19.5772	-5.59597	2.6699	-2.09595	0.0360869	0.99579
								NUMB	19.5999	-5.59568	2.62128	-2.13471	0.0327846	0.99579
								ABCC4	19.562	-5.59332	2.6184	-2.13616	0.0326664	0.99579
								OTUD4	19.4345	-5.58547	2.75694	-2.02597	0.0427679	0.99579
								ASAP1	19.4152	-5.58401	2.67117	-2.09047	0.0365752	0.99579
								ZNF671	19.4096	-5.58356	2.75419	-2.02729	0.0426325	0.99579
								LOC105371026	19.8225	-5.5796	2.50759	-2.22508	0.0260757	0.99579
								SYT1	19.3333	-5.57797	2.75424	-2.02523	0.0428434	0.99579
								FGL2	19.3466	-5.5775	2.61774	-2.13066	0.0331172	0.99579
								BMPR2	19.2934	-5.57509	2.75373	-2.02456	0.0429124	0.99579
								UHRF1BP1L	19.2287	-5.57035	2.75837	-2.01943	0.0434421	0.99579
								KIF14	19.1925	-5.56772	2.75671	-2.0197	0.0434146	0.99579
								ZNF83	19.0801	-5.55942	2.75519	-2.0178	0.043612	0.99579
								COL4A4	19.0628	-5.55821	2.6693	-2.08228	0.0373172	0.99579
								SLC35A1	19.0399	-5.55646	2.66902	-2.08184	0.0373574	0.99579
								USF3	19.0209	-5.55502	2.75347	-2.01746	0.0436472	0.99579
								INSYN2A	18.9789	-5.55005	2.61711	-2.12067	0.0339492	0.99579
								IRS1	104.635	-5.53831	2.10663	-2.62899	0.008564	0.99579
								ADAM9	104.487	-5.53625	2.09092	-2.64775	0.00810285	0.99579
								OGT	104.081	-5.5298	2.27856	-2.42688	0.0152291	0.99579
								SP100	18.9862	-5.5271	2.51577	-2.19698	0.028022	0.99579
								TTK	18.6436	-5.52653	2.75333	-2.00722	0.0447267	0.99579
								ARHGEF12	103.719	-5.52519	2.20876	-2.50149	0.0123671	0.99579
								SOCS6	18.4283	-5.51002	2.75371	-2.00094	0.0453986	0.99579
								CRACD	18.2986	-5.49939	2.67534	-2.05559	0.0398224	0.99579
								CMTR1	18.1615	-5.48926	2.66854	-2.05703	0.0396833	0.99579
								SOX10	18.0739	-5.48239	2.75495	-1.99001	0.0465898	0.99579
								DDX19A	18.1023	-5.48127	2.63139	-2.08303	0.0372486	0.99579
								ITPR1	18.032	-5.47913	2.66837	-2.05336	0.0400373	0.99579
								C11orf42	18.7286	-5.47586	2.54673	-2.15016	0.0315428	0.99579
								SIGLEC10	18.7763	-5.4746	2.56024	-2.13831	0.0324913	0.99579
								PIK3C3	18.0909	-5.47326	2.55704	-2.14047	0.0323168	0.99579
								ZNF100	17.8491	-5.46466	2.66968	-2.04693	0.0406647	0.99579
								NUP210L	17.8777	-5.46455	2.61886	-2.08661	0.0369232	0.99579
								CEP120	17.7804	-5.45903	2.6687	-2.04557	0.0407982	0.99579
								ESCO1	17.771	-5.45873	2.75308	-1.98277	0.0473929	0.99579
								MYCBP2	98.9654	-5.4572	2.23387	-2.44294	0.0145683	0.99579
								MAN2B2	17.9897	-5.45326	2.52718	-2.15785	0.0309399	0.99579
								GPT	17.8356	-5.45259	2.5577	-2.13183	0.0330208	0.99579
								LRRC42	17.6834	-5.45138	2.66968	-2.04196	0.0411555	0.99579
								TRMT11	17.7403	-5.44465	2.55655	-2.12968	0.0331978	0.99579
								CRNKL1	17.5843	-5.44338	2.66845	-2.0399	0.0413599	0.99579
								ANKRD28	17.5994	-5.44212	2.61755	-2.07908	0.0376096	0.99579
								HAT1	17.5689	-5.44171	2.67198	-2.03659	0.0416914	0.99579
								SUCNR1	17.5424	-5.44037	2.75288	-1.97625	0.0481265	0.99579
								GGA1	17.6869	-5.44035	2.55617	-2.12832	0.0333107	0.99579
								PUS1	17.5289	-5.43237	2.58142	-2.10441	0.0353427	0.99579
								ENTPD8	17.432	-5.43135	2.75815	-1.9692	0.0489301	0.99579
								XRN1	17.4091	-5.42955	2.75575	-1.97026	0.0488087	0.99579
								CBL	17.4964	-5.42946	2.58288	-2.1021	0.0355448	0.99579
								CUTC	17.4926	-5.42934	2.58132	-2.10332	0.0354382	0.99579
								BRD1	17.4053	-5.42914	2.75948	-1.96745	0.0491315	0.99579
								SLC16A6	17.8696	-5.42299	2.52485	-2.14785	0.0317256	0.99579
								RPAP3	17.3252	-5.42225	2.67054	-2.0304	0.0423163	0.99579
								TLK1	17.4374	-5.41967	2.56187	-2.11552	0.0343858	0.99579
								DNAJC3	17.3233	-5.41918	2.62717	-2.06275	0.0391367	0.99579
								KRIT1	17.4697	-5.41648	2.54168	-2.13107	0.0330836	0.99579
								ATL2	17.2737	-5.41517	2.62484	-2.06304	0.0391085	0.99579
								NUTM1	17.2298	-5.41437	2.66811	-2.02929	0.0424288	0.99579
								PNPT1	17.2337	-5.41173	2.6279	-2.05934	0.0394617	0.99579
								DDX58	17.7134	-5.40987	2.53074	-2.13767	0.0325438	0.99579
								SMC6	17.1575	-5.40893	2.75436	-1.96377	0.0495567	0.99579
								CCDC88A	17.1251	-5.40622	2.75259	-1.96405	0.0495246	0.99579
								BRSK2	17.0145	-5.39643	2.66828	-2.02244	0.0431312	0.99579
								EXOC2	17.224	-5.39561	2.54755	-2.11796	0.0341784	0.99579
								CCNT2	17.0222	-5.39429	2.62066	-2.05837	0.0395544	0.99579
								SSX2IP	17.0545	-5.39277	2.58318	-2.08765	0.0368294	0.99579
								CYP2U1-AS1	17.1724	-5.39094	2.54253	-2.12031	0.0339803	0.99579
								KIF15	16.8983	-5.38672	2.66809	-2.01894	0.043493	0.99579
								TRIM45	17.8063	-5.38376	2.62775	-2.04881	0.0404809	0.99579
								ABCD3	16.9383	-5.38287	2.58462	-2.08265	0.0372831	0.99579
								GPALPP1	16.8639	-5.3809	2.61683	-2.05627	0.0397565	0.99579
								NSMAF	17.1266	-5.37302	2.52675	-2.12646	0.033465	0.99579
								PNRC2	16.8466	-5.36299	2.54264	-2.10923	0.034925	0.99579
								FBXW7	16.78	-5.35716	2.54597	-2.10417	0.0353632	0.99579
								MARCHF1	16.7209	-5.3519	2.5423	-2.10514	0.0352791	0.99579
								MED13	91.4202	-5.34292	2.16612	-2.46659	0.0136406	0.99579
								C1GALT1C1	16.4468	-5.33989	2.59828	-2.05516	0.0398634	0.99579
								SETD3	16.4372	-5.33928	2.59129	-2.06047	0.0393537	0.99579
								PUS3	16.4352	-5.33917	2.58263	-2.06734	0.0387023	0.99579
								SHOC1	16.4352	-5.33917	2.58263	-2.06734	0.0387023	0.99579
								CAPZA2	16.38	-5.33914	2.61713	-2.04007	0.0413434	0.99579
								CRHR2	16.38	-5.33914	2.61713	-2.04007	0.0413434	0.99579
								KIF3A	16.3762	-5.33888	2.61782	-2.03944	0.0414066	0.99579
								SLC9C1	16.3762	-5.33888	2.61782	-2.03944	0.0414066	0.99579
								PRNP	91.125	-5.33811	2.19299	-2.43417	0.014926	0.99579
								CDC40	16.3591	-5.33731	2.62162	-2.03589	0.0417618	0.99579
								OXCT1-AS1	16.637	-5.33714	2.53338	-2.10672	0.0351416	0.99579
								LOC105371768	16.5322	-5.33506	2.54316	-2.0978	0.0359224	0.99579
								ITSN2	16.3876	-5.33498	2.58894	-2.06068	0.0393334	0.99579
								ATAD2B	16.8654	-5.33482	2.53588	-2.10373	0.0354018	0.99579
								SLC5A9	16.3417	-5.33457	2.63272	-2.02626	0.042738	0.99579
								CFAP57	16.3798	-5.32135	2.54406	-2.09168	0.0364675	0.99579
								CHD7	89.7932	-5.31635	2.2607	-2.35164	0.018691	0.99579
								PAPSS2	16.5645	-5.31522	2.53474	-2.09695	0.0359982	0.99579
								CREBBP	89.6695	-5.31463	2.22378	-2.38991	0.0168526	0.99579
								RALB	16.694	-5.31307	2.56752	-2.06934	0.0385143	0.99579
								TPRG1L	16.2502	-5.3097	2.54414	-2.08703	0.0368856	0.99579
								EPHB2	15.9933	-5.30837	2.66835	-1.98938	0.0466588	0.99579
								UGDH	16.0218	-5.30745	2.6174	-2.02775	0.0425853	0.99579
								PDZK1P1	16.0845	-5.29453	2.54492	-2.08043	0.0374865	0.99579
								ZDHHC17	15.8275	-5.29353	2.66844	-1.98375	0.0472835	0.99579
								PRKRA	15.8941	-5.29078	2.58555	-2.04629	0.0407282	0.99579
								MAP3K7	15.875	-5.28889	2.58388	-2.04688	0.0406696	0.99579
								PITX3	15.7571	-5.2872	2.67167	-1.97898	0.047818	0.99579
								DPYSL2	15.7	-5.28169	2.68089	-1.97012	0.0488244	0.99579
								BIRC2	15.8502	-5.28025	2.56078	-2.06197	0.0392109	0.99579
								WDR82	16.0595	-5.27603	2.54071	-2.0766	0.0378387	0.99579
								INSR	15.6732	-5.27589	2.62002	-2.01368	0.0440431	0.99579
								MUC4	15.6636	-5.27501	2.61806	-2.01485	0.04392	0.99579
								UNK	15.6503	-5.2738	2.6183	-2.01421	0.0439878	0.99579
								SLC16A5	15.9339	-5.2727	2.53835	-2.07721	0.0377818	0.99579
								DIP2C-AS1	15.6501	-5.26783	2.5886	-2.03501	0.04185	0.99579
								C17orf80	15.4864	-5.26236	2.6696	-1.97121	0.0486994	0.99579
								ANTXR1	15.6253	-5.25907	2.56288	-2.05201	0.0401683	0.99579
								FXR1	85.9725	-5.25423	2.07899	-2.5273	0.0114942	0.99579
								SMARCAL1	15.77	-5.24887	2.54036	-2.06619	0.0388103	0.99579
								ISM1	15.4215	-5.24637	2.59061	-2.02515	0.0428523	0.99579
								PDS5A	85.4945	-5.24619	2.09604	-2.5029	0.0123181	0.99579
								ABCA12	15.2865	-5.24402	2.67132	-1.96309	0.0496361	0.99579
								CELA2B	15.3777	-5.24271	2.585	-2.02813	0.0425473	0.99579
								GHRL	15.2596	-5.23732	2.61886	-1.99985	0.0455167	0.99579
								LOC105374216	15.3891	-5.23698	2.56383	-2.04264	0.0410882	0.99579
								C5orf24	15.2234	-5.23376	2.62023	-1.99744	0.0457769	0.99579
								ERLIN1	15.2083	-5.23231	2.6304	-1.98917	0.0466822	0.99579
								PHF3	84.7061	-5.23203	2.2546	-2.3206	0.0203085	0.99579
								LRRK1	15.1853	-5.22448	2.5852	-2.02092	0.043288	0.99579
								GLCE	15.0197	-5.21454	2.62594	-1.98578	0.0470574	0.99579
								PCMTD2	15.328	-5.21427	2.54617	-2.04789	0.0405708	0.99579
								RPS6KC1	14.9872	-5.21157	2.6195	-1.98953	0.0466424	0.99579
								SMG1	82.8944	-5.20033	2.307	-2.25415	0.0241866	0.99579
								WDR76	14.9262	-5.19955	2.58751	-2.00948	0.0444865	0.99579
								LOC105372141	15.0766	-5.19851	2.55081	-2.03799	0.041551	0.99579
								RMND5A	14.9852	-5.19777	2.56414	-2.0271	0.0426526	0.99579
								LOC105378286	14.9738	-5.19656	2.58087	-2.01349	0.044063	0.99579
								GRPEL1	14.9356	-5.19281	2.56492	-2.02455	0.0429139	0.99579
								ZNF800	14.7604	-5.1833	2.58814	-2.00271	0.045208	0.99579
								KIAA1958	15.006	-5.18249	2.54581	-2.03569	0.0417812	0.99579
								MARCHF3	14.6253	-5.17628	2.62589	-1.97124	0.048696	0.99579
								H2BC12	81.5889	-5.17507	2.58615	-2.00107	0.0453843	0.99579
								FAM114A1	14.6061	-5.17449	2.61979	-1.97515	0.0482511	0.99579
								ZCCHC2	14.3546	-5.14931	2.62085	-1.96475	0.0494433	0.99579
								CHSY1	14.4764	-5.13798	2.55574	-2.01037	0.044392	0.99579
								EFL1	14.2174	-5.12853	2.58878	-1.98106	0.0475845	0.99579
								NSD2	78.2578	-5.11815	2.06644	-2.4768	0.0132567	0.99579
								CNTN2	13.9125	-5.0968	2.59076	-1.9673	0.0491483	0.99579
								FAM98A	13.9068	-5.08766	2.57869	-1.97296	0.0484996	0.99579
								PRKCA	13.8134	-5.08607	2.59469	-1.96018	0.0499744	0.99579
								NUCB2	13.7925	-5.08438	2.59152	-1.96193	0.0497703	0.99579
								MDN1-AS1	299.083	-5.04418	1.76712	-2.85446	0.00431103	0.99579
								ESR2	13.5885	-5.0429	2.56414	-1.96671	0.0492172	0.99579
								SLC30A3	13.5218	-5.03567	2.5637	-1.96422	0.0495046	0.99579
								MGA	73.8925	-5.03511	2.11633	-2.37917	0.0173519	0.99579
								SMC4	72.0522	-4.99866	2.09054	-2.39109	0.0167986	0.99579
								WDFY3-AS1	138.183	-4.93148	2.07264	-2.37933	0.0173444	0.99579
								MUC6	67.7936	-4.91039	2.08351	-2.35679	0.0184337	0.99579
								PTPRK-AS1	135.711	-4.90614	1.79682	-2.73046	0.00632468	0.99579
								MAMDC4	67.5404	-4.90473	2.1878	-2.24186	0.0249706	0.99579
								SMC3	66.4925	-4.88226	2.06296	-2.36663	0.0179509	0.99579
								IGF2R	66.3995	-4.87934	2.27833	-2.14163	0.0322235	0.99579
								LOC112268182	66.1953	-4.87533	2.22535	-2.19081	0.0284656	0.99579
								NEB	66.0961	-4.87359	2.06091	-2.36478	0.0180409	0.99579
								CEMIP	64.7834	-4.84462	2.14947	-2.25387	0.0242043	0.99579
								RNF213	258.042	-4.82948	1.66731	-2.89658	0.00377259	0.99579
								VPS13D	62.3351	-4.78783	2.27285	-2.10653	0.0351582	0.99579
								NSD1	186.722	-4.77761	2.02821	-2.35558	0.0184939	0.99579
								GPR162	60.224	-4.73852	2.21398	-2.14027	0.0323329	0.99579
								PUM2	60.0524	-4.7345	2.04908	-2.31055	0.0208577	0.99579
								MED14OS	58.5664	-4.69857	2.13673	-2.19896	0.0278811	0.99579
								SPAG9	58.115	-4.68738	2.11065	-2.22082	0.0263629	0.99579
								AKAP9	115.664	-4.67316	2.00695	-2.3285	0.0198858	0.99579
								XPOT	56.9333	-4.65748	2.08189	-2.23714	0.0252774	0.99579
								GOLGB1	112.328	-4.63115	1.87236	-2.47343	0.0133822	0.99579
								U2SURP	55.6036	-4.62325	2.1637	-2.13673	0.0326198	0.99579
								LAMB1	55.481	-4.61613	1.96288	-2.35172	0.018687	0.99579
								USP9X	111.08	-4.61489	1.86754	-2.4711	0.0134697	0.99579
								ACACA	110.881	-4.61187	1.72235	-2.67766	0.00741387	0.99579
								ERRFI1	166.661	-4.61024	1.48851	-3.09721	0.00195348	0.99579
								ZC3H14	55.0676	-4.60441	1.9547	-2.35556	0.0184948	0.99579
								EIF4G3	54.3196	-4.5886	2.25654	-2.03347	0.0420052	0.99579
								SLC5A4	53.6388	-4.56818	1.98097	-2.30603	0.0211088	0.99579
								SLK	53.4887	-4.56707	2.15922	-2.11514	0.0344177	0.99579
								ESRP1	53.5021	-4.5666	2.25526	-2.02486	0.0428815	0.99579
								PCNT	105.953	-4.54532	2.03636	-2.23208	0.0256096	0.99579
								LAMA5	51.8898	-4.52254	2.05014	-2.20597	0.0273859	0.99579
								ENC1	102.82	-4.50223	1.92502	-2.3388	0.0193458	0.99579
								PRPF4B	50.8537	-4.49393	2.12129	-2.11849	0.0341338	0.99579
								TSSK4	50.5483	-4.48342	2.01317	-2.22705	0.025944	0.99579
								LOC100507346	50.3124	-4.47836	2.11938	-2.11305	0.0345966	0.99579
								RPL22L1	50.181	-4.47334	2.03404	-2.19924	0.0278609	0.99579
								GPR68	49.6597	-4.44376	1.9225	-2.31145	0.020808	0.99579
								ATP11A	49.1423	-4.44335	2.04505	-2.17273	0.0298003	0.99579
								HCFC1	49.0549	-4.44127	2.06493	-2.15081	0.031491	0.99579
								C2	49.7424	-4.42765	2.01464	-2.19773	0.0279682	0.99579
								MARCHF6	48.1649	-4.41365	2.02339	-2.18132	0.0291601	0.99579
								SENP6	47.7424	-4.40158	2.24302	-1.96235	0.0497223	0.99579
								COL12A1	47.5729	-4.39694	2.19115	-2.00668	0.044784	0.99579
								RANBP2	238.196	-4.38611	1.80255	-2.43327	0.014963	0.99579
								AHCTF1	46.6845	-4.36952	2.08332	-2.09738	0.0359599	0.99579
								RASA1	92.8413	-4.35364	1.84236	-2.36308	0.0181238	0.99579
								TTN	932.729	-4.35243	1.69036	-2.57486	0.0100282	0.99579
								TNRC6A	45.7875	-4.3415	2.18426	-1.98763	0.0468529	0.99579
								WNT8B	45.7964	-4.33991	2.02098	-2.14742	0.0317598	0.99579
								MTUS1	91.748	-4.33646	1.81811	-2.38515	0.0170723	0.99579
								RFX7	45.3644	-4.32815	2.10793	-2.05327	0.0400459	0.99579
								OR51J1	182.103	-4.31906	1.44203	-2.99513	0.00274329	0.99579
								CHD2	135.845	-4.31459	1.72153	-2.50626	0.0122017	0.99579
								ATM	89.6845	-4.3032	1.87807	-2.29129	0.0219464	0.99579
								TRRAP	89.4238	-4.29825	2.01328	-2.13495	0.0327652	0.99579
								MSH6	134.33	-4.29816	1.68149	-2.55617	0.0105832	0.99579
								CHD8	89.3037	-4.29709	1.83406	-2.34294	0.0191326	0.99579
								DUSP6	43.9008	-4.27832	2.01484	-2.12341	0.0337199	0.99579
								SOX4	44.1709	-4.27597	1.93814	-2.20622	0.0273684	0.99579
								LOC105376615	43.7238	-4.27383	2.05329	-2.08145	0.0373924	0.99579
								AKAP12	1209.36	-4.2396	1.33941	-3.16527	0.00154941	0.99579
								PRRC2C	172.07	-4.23802	1.63307	-2.59513	0.00945561	0.99579
								C9orf50	42.7021	-4.23662	1.99935	-2.119	0.0340908	0.99579
								USP24	42.4808	-4.21764	1.9359	-2.17865	0.0293578	0.99579
								LAMA2	84.3632	-4.21358	1.96134	-2.14832	0.0316885	0.99579
								PDZD2	41.847	-4.21092	2.13359	-1.97363	0.0484234	0.99579
								N4BP2L2	41.8433	-4.20969	2.05176	-2.05175	0.0401942	0.99579
								TCF7L2	125.159	-4.19478	1.77184	-2.36747	0.01791	0.99579
								ZFHX4	41.2984	-4.19123	2.07105	-2.02372	0.0429991	0.99579
								NOP58	40.9744	-4.18036	2.13044	-1.9622	0.0497391	0.99579
								FRAS1	82.4479	-4.18034	1.89431	-2.20678	0.0273294	0.99579
								TBL1XR1	40.9722	-4.17712	2.00893	-2.07927	0.0375922	0.99579
								TIAM1	40.898	-4.17458	2.00747	-2.07952	0.0375693	0.99579
								SAMD3	123.7	-4.17115	1.47462	-2.82862	0.00467485	0.99579
								SDHC	40.6883	-4.16792	2.02571	-2.05752	0.0396367	0.99579
								ARHGAP18	81.6251	-4.1659	1.84013	-2.26391	0.0235794	0.99579
								TASOR	40.6066	-4.16511	2.02548	-2.05636	0.0397481	0.99579
								TGOLN2	40.5248	-4.16414	2.09544	-1.98724	0.0468962	0.99579
								PRKAR1A	122.504	-4.16274	1.58786	-2.62161	0.00875154	0.99579
								ANAPC10	80.7883	-4.14982	1.71382	-2.42138	0.0154617	0.99579
								STK4	40.1054	-4.14777	2.04328	-2.02995	0.0423612	0.99579
								KMT2D	119.908	-4.1319	1.82806	-2.26026	0.0238052	0.99579
								PAXBP1	39.5893	-4.13015	2.09386	-1.9725	0.0485523	0.99579
								L3MBTL3	39.5948	-4.12905	2.04197	-2.0221	0.0431664	0.99579
								HBS1L	39.6366	-4.12739	1.99037	-2.07367	0.0381096	0.99579
								CUL3	39.5716	-4.1187	1.95267	-2.10926	0.0349223	0.99579
								NOSTRIN	39.6381	-4.11557	1.93864	-2.12292	0.0337608	0.99579
								DOCK1	77.1438	-4.083	1.94904	-2.09487	0.0361821	0.99579
								LOC105378552	76.3451	-4.06796	1.77162	-2.29618	0.0216656	0.99579
								HUWE1	306.744	-4.06681	1.56325	-2.6015	0.00928158	0.99579
								HELLS	37.9315	-4.06528	2.0191	-2.01341	0.0440719	0.99579
								TPR	152.75	-4.06335	1.79604	-2.2624	0.0236729	0.99579
								SEC23IP	37.5636	-4.04962	2.00069	-2.02412	0.0429583	0.99579
								DEK	37.6378	-4.04777	1.96708	-2.05776	0.0396133	0.99579
								KMT2C	74.3622	-4.02907	1.98843	-2.02626	0.0427381	0.99579
								ZNF609	36.935	-4.02737	2.03607	-1.97801	0.0479271	0.99579
								ARHGAP12	73.6649	-4.01582	1.90657	-2.1063	0.0351782	0.99579
								LOC107986196	36.1746	-3.99411	1.998	-1.99905	0.0456027	0.99579
								PDP1	255.082	-3.99198	1.42231	-2.80668	0.00500557	0.99579
								PCDH7	36.2276	-3.98673	1.94969	-2.0448	0.0408746	0.99579
								TOP2A	71.1306	-3.96478	1.84295	-2.15132	0.0314507	0.99579
								ITPRID2	464.258	-3.96114	1.45093	-2.73006	0.00633219	0.99579
								NIPBL	177.104	-3.95125	1.94968	-2.02662	0.0427018	0.99579
								DYNC1H1	353.893	-3.9483	1.66548	-2.37066	0.0177563	0.99579
								AHNAK	813.583	-3.94625	1.67448	-2.35671	0.0184377	0.99579
								ITGB1	279.034	-3.92764	1.58685	-2.47511	0.0133195	0.99579
								ATAD2	68.9163	-3.9182	1.77351	-2.2093	0.027154	0.99579
								SCAF11	68.7149	-3.91411	1.89736	-2.06293	0.0391194	0.99579
								GPBP1L1	34.2443	-3.90693	1.9616	-1.99171	0.0464032	0.99579
								MYCBP2-AS1	101.853	-3.89133	1.55675	-2.49965	0.0124317	0.99579
								LRRC37A	66.3328	-3.86249	1.80846	-2.13579	0.0326968	0.99579
								ARID1A	64.3781	-3.81867	1.88638	-2.02434	0.0429355	0.99579
								BIRC6	128.515	-3.80927	1.88461	-2.02125	0.0432541	0.99579
								XPO1	63.7744	-3.80487	1.88881	-2.01443	0.0439645	0.99579
								AFDN	63.5753	-3.79834	1.70149	-2.23237	0.0255906	0.99579
								THOC2	63.2003	-3.78963	1.70535	-2.2222	0.0262696	0.99579
								KITLG	158.245	-3.78363	1.39141	-2.71927	0.00654263	0.99579
								LAMA5-AS1	189.527	-3.78265	1.70817	-2.21444	0.0267986	0.99579
								ITGA6	62.6898	-3.77965	1.79998	-2.09984	0.0357433	0.99579
								MCM4	61.9827	-3.76291	1.80051	-2.08992	0.0366254	0.99579
								ACSL5	153.552	-3.74208	1.56578	-2.38992	0.0168522	0.99579
								NCAPG	61.2219	-3.73803	1.63534	-2.28578	0.0222671	0.99579
								NUFIP2	60.8913	-3.73693	1.79735	-2.07913	0.0376051	0.99579
								ANKRD17	121.594	-3.72847	1.69957	-2.19377	0.0282518	0.99579
								DNMT1	90.9099	-3.7255	1.62526	-2.29224	0.0218915	0.99579
								DCBLD2	268.3	-3.69586	1.54475	-2.39254	0.0167324	0.99579
								CHD3	57.7753	-3.65689	1.69348	-2.15939	0.0308202	0.99579
								PDLIM5	57.4441	-3.64856	1.68826	-2.16114	0.0306847	0.99579
								SPDYE5	112.422	-3.6127	1.76843	-2.04289	0.0410636	0.99579
								PSMA3	54.9306	-3.57881	1.64649	-2.17359	0.0297359	0.99579
								MATR3	137.207	-3.57616	1.63796	-2.1833	0.0290134	0.99579
								SMARCE1	52.5097	-3.51658	1.72217	-2.04195	0.0411568	0.99579
								EIF2AK4	51.6501	-3.49305	1.71624	-2.03529	0.0418221	0.99579
								CYP2F2P	51.5564	-3.48701	1.66634	-2.09261	0.036384	0.99579
								MTAP	77.1054	-3.48211	1.59705	-2.18033	0.0292327	0.99579
								ARHGAP29	204.034	-3.46545	1.62565	-2.13173	0.0330294	0.99579
								NCBP1	50.1032	-3.44928	1.74895	-1.9722	0.0485866	0.99579
								CD37	201.127	-3.44404	1.4871	-2.31595	0.020561	0.99579
								MET	172.265	-3.4131	1.62951	-2.09456	0.03621	0.99579
								SF3B1	171.138	-3.40337	1.62849	-2.08989	0.0366274	0.99579
								OPA1-AS1	48.5552	-3.39227	1.63839	-2.07049	0.038406	0.99579
								REV1	48.4943	-3.38775	1.632	-2.07583	0.0379098	0.99579
								MYO15A	71.9386	-3.38092	1.69726	-1.99198	0.0463729	0.99579
								SRRM2	312.924	-3.37794	1.6069	-2.10215	0.0355406	0.99579
								HIF1A	71.7385	-3.37686	1.71997	-1.96333	0.0496083	0.99579
								SLTM	71.7003	-3.37463	1.59928	-2.11009	0.0348507	0.99579
								NUP188	94.1568	-3.35069	1.61706	-2.07209	0.0382567	0.99579
								NR2F1	71.1664	-3.34211	1.57146	-2.12676	0.0334399	0.99579
								HMGA2-AS1	303.389	-3.32764	1.27872	-2.60232	0.00925965	0.99579
								GLG1	184.899	-3.31619	1.31887	-2.51441	0.0119232	0.99579
								PMS1	45.8325	-3.30185	1.63398	-2.02074	0.0433065	0.99579
								KCNQ1OT1	67.5063	-3.26344	1.56204	-2.08921	0.0366886	0.99579
								DDX3X	154.551	-3.25152	1.46569	-2.21842	0.0265262	0.99579
								ANKRD11	371.72	-3.23423	1.56308	-2.06915	0.0385325	0.99579
								OGA	105.024	-3.1799	1.60267	-1.98412	0.0472422	0.99579
								CYB561D2	103.983	-3.15495	1.38628	-2.27583	0.0228559	0.99579
								LRRC37A2	81.9773	-3.14112	1.46688	-2.14137	0.0322445	0.99579
								LRPPRC	118.426	-3.08451	1.44403	-2.13604	0.0326761	0.99579
								FN1	98.3948	-3.08232	1.5346	-2.00855	0.0445847	0.99579
								SBF2-AS1	58.9531	-3.08011	1.54321	-1.99591	0.0459432	0.99579
								PPP1CC	78.1063	-3.07164	1.5303	-2.00721	0.0447273	0.99579
								ZC3H13	97.3688	-3.06226	1.40698	-2.17648	0.0295194	0.99579
								IPO5	94.5001	-3.02173	1.51445	-1.99527	0.0460135	0.99579
								DXO	94.1738	-3.0143	1.43472	-2.10097	0.0356433	0.99579
								USP7	74.9739	-3.0095	1.50389	-2.00114	0.0453776	0.99579
								NUMA1	150.343	-3.00883	1.36598	-2.20268	0.027617	0.99579
								RAD21	126.308	-2.95001	1.45791	-2.02345	0.0430272	0.99579
								MIA3	71.336	-2.93233	1.46647	-1.99958	0.0455458	0.99579
								SLC38A2	88.7504	-2.92009	1.3897	-2.10124	0.0356198	0.99579
								LOC101927179	103.001	-2.87265	1.38022	-2.0813	0.0374066	0.99579
								EHBP1-AS1	240.368	-2.66422	1.29324	-2.06012	0.0393868	0.99579

## Sheet: Table S5
Supplementary Table S5. DEGs in HCT116 Control vs HCT116 Cisplatin 300M
UpregulatedGenes	baseMean	log2FoldChange	lfcSE	stat	pvalue	padj		DownregulatedGenes	baseMean	log2FoldChange	lfcSE	stat	pvalue	padj
TEX54	38.9861	9.44561	2.35202	4.01596	5.92037e-05	0.192218		LOC112268166	46.0615	-18.6049	4.11918	-4.51666	6.28238e-06	0.0461103
KMT2E-AS1	14.2578	9.15863	2.4413	3.75153	0.000175758	0.285318		LINC01271	37.2412	-18.3195	4.1062	-4.46142	8.14171e-06	0.0461103
LINC01465	14.2578	9.15863	2.4413	3.75153	0.000175758	0.285318		LOC112268006	35.7711	-18.2663	4.10413	-4.45072	8.55838e-06	0.0461103
CDC27P10	30.4314	9.07697	2.38679	3.803	0.000142954	0.285318		MTND2P28	31.361	-18.0905	4.09838	-4.41407	1.01444e-05	0.0461103
LOC100499489	12.832	9.00662	2.47882	3.63344	0.000279673	0.353118		DSP	982.028	-10.2859	2.87246	-3.58087	0.000342456	0.370619
LOC107985163	12.832	9.00662	2.47882	3.63344	0.000279673	0.353118		AHNAK	682.891	-9.76211	2.71314	-3.59809	0.000320569	0.364278
ACE3P	9.98048	8.64405	2.58311	3.34637	0.000818762	0.616625		DNMBP-AS1	368.3	-8.87207	2.58271	-3.43518	0.000592156	0.538318
LOC101929566	9.98048	8.64405	2.58311	3.34637	0.000818762	0.616625		ANKRD11	306.08	-8.60535	2.62967	-3.27241	0.00106634	0.734384
RPL36AL	9.98048	8.64405	2.58311	3.34637	0.000818762	0.616625		MDN1-AS1	253.621	-8.33435	2.6905	-3.0977	0.00195031	0.790429
LOC112268274	21.8767	8.58109	2.44684	3.50701	0.000453174	0.46815		ADGRL1-AS1	251.955	-8.32445	2.43529	-3.41826	0.000630229	0.550893
CTNND2	8.55469	8.42166	2.6587	3.16759	0.00153711	0.790429		OR52D1	228.641	-8.1848	2.76925	-2.9556	0.00312058	0.790429
HNRNPDLP2	8.55469	8.42166	2.6587	3.16759	0.00153711	0.790429		AMZ1	211.157	-8.06658	2.41593	-3.33891	0.000841087	0.616625
LINC00957	8.55469	8.42166	2.6587	3.16759	0.00153711	0.790429		RANBP2	201.284	-8.00129	2.73997	-2.92022	0.00349788	0.790429
LOC105378629	8.55469	8.42166	2.6587	3.16759	0.00153711	0.790429		MACF1	190.897	-7.92477	2.82114	-2.80906	0.00496861	0.790429
OR7E106P	8.55469	8.42166	2.6587	3.16759	0.00153711	0.790429		HNRNPU	190.271	-7.92012	2.45918	-3.22064	0.00127905	0.790429
TEDC2-AS1	8.55469	8.42166	2.6587	3.16759	0.00153711	0.790429		MYOF	172.708	-7.78104	2.6322	-2.9561	0.00311555	0.790429
FSIP1	70.9866	8.22074	1.88998	4.34965	1.36353e-05	0.0516481		CD44	172.13	-7.77581	2.46092	-3.15972	0.00157919	0.790429
ADAMTS7P1	7.12891	8.15862	2.76105	2.9549	0.00312768	0.790429		LOC101927864	170.514	-7.75855	2.40627	-3.2243	0.00126279	0.790429
BMP8B-AS1	7.12891	8.15862	2.76105	2.9549	0.00312768	0.790429		ARHGAP29	169.004	-7.7498	2.64415	-2.93092	0.00337962	0.790429
LINC01553	7.12891	8.15862	2.76105	2.9549	0.00312768	0.790429		LOC105371942	167.559	-7.73241	2.42176	-3.19288	0.00140859	0.790429
LINC01852	7.12891	8.15862	2.76105	2.9549	0.00312768	0.790429		CENPF	162.767	-7.69504	2.86393	-2.68688	0.00721233	0.790429
LOC107983966	7.12891	8.15862	2.76105	2.9549	0.00312768	0.790429		MYH9	158.5	-7.65748	2.54088	-3.01371	0.0025807	0.790429
LOC107984510	7.12891	8.15862	2.76105	2.9549	0.00312768	0.790429		LAMA5-AS1	158.403	-7.65642	2.68526	-2.85128	0.0043544	0.790429
MIR219A1	7.12891	8.15862	2.76105	2.9549	0.00312768	0.790429		CHD4	150.591	-7.58351	2.48236	-3.05496	0.00225094	0.790429
TOB1-AS1	7.12891	8.15862	2.76105	2.9549	0.00312768	0.790429		EIF4G1	150.54	-7.58329	2.53361	-2.99308	0.00276177	0.790429
ARPIN	5.70313	7.83669	2.90766	2.69518	0.00703497	0.790429		OR51J1	147.92	-7.55726	2.44698	-3.0884	0.00201239	0.790429
AUTS2	5.70313	7.83669	2.90766	2.69518	0.00703497	0.790429		TONSL-AS1	147.484	-7.54707	2.45204	-3.07788	0.00208482	0.790429
DDX59-AS1	5.70313	7.83669	2.90766	2.69518	0.00703497	0.790429		PRRC2C	143.506	-7.51445	2.59169	-2.89944	0.00373834	0.790429
EYA2	5.70313	7.83669	2.90766	2.69518	0.00703497	0.790429		LOC101927393	138.309	-7.45285	2.5293	-2.9466	0.00321287	0.790429
GABRG3	5.70313	7.83669	2.90766	2.69518	0.00703497	0.790429		HNRNPH1	136.582	-7.44327	2.54665	-2.92277	0.00346938	0.790429
ISM2	5.70313	7.83669	2.90766	2.69518	0.00703497	0.790429		MYH11	136.866	-7.44263	2.40192	-3.09862	0.00194427	0.790429
KANSL1-AS1	5.70313	7.83669	2.90766	2.69518	0.00703497	0.790429		OR51Q1	136.432	-7.44117	2.78259	-2.67419	0.00749093	0.790429
LINC01587	5.70313	7.83669	2.90766	2.69518	0.00703497	0.790429		MRPL43	135.943	-7.43029	2.4246	-3.06455	0.00217999	0.790429
LINC02340	5.70313	7.83669	2.90766	2.69518	0.00703497	0.790429		ERRFI1	135.106	-7.42644	2.43484	-3.05007	0.00228787	0.790429
LOC101929307	5.70313	7.83669	2.90766	2.69518	0.00703497	0.790429		ACTN4	133.619	-7.41114	2.46781	-3.00313	0.0026722	0.790429
LOC102723480	5.70313	7.83669	2.90766	2.69518	0.00703497	0.790429		FLNB	133.148	-7.40662	2.55428	-2.89969	0.0037353	0.790429
LOC105369657	5.70313	7.83669	2.90766	2.69518	0.00703497	0.790429		LONP2	132.568	-7.39567	2.40588	-3.074	0.00211212	0.790429
LOC105370346	5.70313	7.83669	2.90766	2.69518	0.00703497	0.790429		ACBD3-AS1	132.199	-7.39516	2.437	-3.03454	0.00240906	0.790429
LOC105370660	5.70313	7.83669	2.90766	2.69518	0.00703497	0.790429		ZNF225-AS1	130.436	-7.37677	2.49641	-2.95495	0.00312719	0.790429
LOC105374852	5.70313	7.83669	2.90766	2.69518	0.00703497	0.790429		TPR	128.375	-7.35381	2.7143	-2.70928	0.00674286	0.790429
LOC107986584	5.70313	7.83669	2.90766	2.69518	0.00703497	0.790429		OR51M1	127.812	-7.34775	2.61547	-2.80934	0.00496427	0.790429
LOC107986999	5.70313	7.83669	2.90766	2.69518	0.00703497	0.790429		PALLD	127.343	-7.34246	2.61524	-2.80757	0.00499175	0.790429
LOC112267966	5.70313	7.83669	2.90766	2.69518	0.00703497	0.790429		ITPR3	124.942	-7.31508	2.5455	-2.87373	0.00405655	0.790429
LOC728158	5.70313	7.83669	2.90766	2.69518	0.00703497	0.790429		RRBP1	124.52	-7.30576	2.40377	-3.03929	0.0023714	0.790429
RNA5SP85	5.70313	7.83669	2.90766	2.69518	0.00703497	0.790429		SPTBN1	118.987	-7.24421	2.79532	-2.59155	0.00955441	0.790429
RNU6-323P	5.70313	7.83669	2.90766	2.69518	0.00703497	0.790429		BOP1	118.064	-7.23075	2.41099	-2.99908	0.00270795	0.790429
RNU6-8	5.70313	7.83669	2.90766	2.69518	0.00703497	0.790429		WDFY3-AS1	117.7	-7.22842	2.8287	-2.55539	0.010607	0.790429
SEPTIN7P2	5.70313	7.83669	2.90766	2.69518	0.00703497	0.790429		RNF213-AS1	117.374	-7.2243	2.45455	-2.94323	0.00324809	0.790429
SNORD74	5.70313	7.83669	2.90766	2.69518	0.00703497	0.790429		SNRNP200	117.177	-7.22279	2.59567	-2.78263	0.00539196	0.790429
SP2-AS1	5.70313	7.83669	2.90766	2.69518	0.00703497	0.790429		LOC100131626	116.948	-7.21998	2.59489	-2.78239	0.00539609	0.790429
ST8SIA2	5.70313	7.83669	2.90766	2.69518	0.00703497	0.790429		ITGA3	113.112	-7.17034	2.43227	-2.948	0.00319841	0.790429
TNN	5.70313	7.83669	2.90766	2.69518	0.00703497	0.790429		ZFHX3	111.741	-7.15432	2.51886	-2.8403	0.00450714	0.790429
TTC41P	5.70313	7.83669	2.90766	2.69518	0.00703497	0.790429		LOC107985921	111.386	-7.14687	2.41207	-2.96296	0.00304696	0.790429
MIR4754	13.3221	7.8218	2.57598	3.03644	0.00239392	0.790429		LOC100289580	109.999	-7.1311	2.46712	-2.89045	0.00384691	0.790429
LOC105374570	10.0461	7.72123	2.32704	3.31806	0.000906461	0.643786		LOC107984347	108.294	-7.10509	2.40626	-2.95275	0.00314962	0.790429
ZNF444P1	10.4705	7.44481	2.66034	2.79844	0.00513499	0.790429		BIRC6	107.934	-7.10396	2.78418	-2.55155	0.0107245	0.790429
RPL7P60	8.63223	7.42907	2.38097	3.12019	0.00180737	0.790429		OBI1-AS1	107.198	-7.0934	2.4459	-2.90012	0.00373019	0.790429
AKR1B10	4.27735	7.42164	3.13608	2.36653	0.0179555	0.790429		TTN-AS1	107.018	-7.09102	2.94119	-2.41093	0.0159118	0.790429
ANKRD20A7P	4.27735	7.42164	3.13608	2.36653	0.0179555	0.790429		IARS1	106.743	-7.08863	2.6125	-2.71335	0.00666063	0.790429
AOX1	4.27735	7.42164	3.13608	2.36653	0.0179555	0.790429		VPS13A	106.531	-7.08479	2.86558	-2.47237	0.013422	0.790429
ATP5MGP5	4.27735	7.42164	3.13608	2.36653	0.0179555	0.790429		H1-2	105.828	-7.07416	3.16626	-2.23423	0.025468	0.790429
BHLHB9P1	4.27735	7.42164	3.13608	2.36653	0.0179555	0.790429		SIAH1	105.971	-7.06648	2.74337	-2.57584	0.00999967	0.790429
DLGAP3	4.27735	7.42164	3.13608	2.36653	0.0179555	0.790429		TTC36-AS1	104.648	-7.05976	2.49452	-2.83011	0.00465317	0.790429
EDN2	4.27735	7.42164	3.13608	2.36653	0.0179555	0.790429		EIF5B	104.223	-7.05	2.4075	-2.92834	0.00340772	0.790429
FGF4	4.27735	7.42164	3.13608	2.36653	0.0179555	0.790429		LOC105371064	100.649	-6.9989	2.40803	-2.90649	0.00365513	0.790429
GSTA7P	4.27735	7.42164	3.13608	2.36653	0.0179555	0.790429		ILF3	98.5445	-6.9732	2.48699	-2.80388	0.00504923	0.790429
GYG1P1	4.27735	7.42164	3.13608	2.36653	0.0179555	0.790429		AKAP9	98.1097	-6.96675	2.77409	-2.51137	0.0120265	0.790429
H1-12P	4.27735	7.42164	3.13608	2.36653	0.0179555	0.790429		SAMD3	98.2415	-6.96583	2.41422	-2.88533	0.00391005	0.790429
HSPD1P6	4.27735	7.42164	3.13608	2.36653	0.0179555	0.790429		APLP2	97.6708	-6.95873	2.43207	-2.86123	0.00422	0.790429
KCNMA1	4.27735	7.42164	3.13608	2.36653	0.0179555	0.790429		C19orf71	97.8702	-6.95196	2.53952	-2.73751	0.00619069	0.790429
KNOP1P3	4.27735	7.42164	3.13608	2.36653	0.0179555	0.790429		MMS19	96.6119	-6.94189	2.41616	-2.87311	0.00406451	0.790429
KRT8P48	4.27735	7.42164	3.13608	2.36653	0.0179555	0.790429		THRAP3	95.6903	-6.93114	2.50457	-2.76739	0.00565065	0.790429
LCN12	4.27735	7.42164	3.13608	2.36653	0.0179555	0.790429		VPS13B	95.1335	-6.92244	2.77039	-2.49873	0.0124641	0.790429
LINC00558	4.27735	7.42164	3.13608	2.36653	0.0179555	0.790429		EPRS1	94.8408	-6.91858	2.54453	-2.719	0.00654803	0.790429
LINC01714	4.27735	7.42164	3.13608	2.36653	0.0179555	0.790429		CKAP5	94.8373	-6.9185	2.64562	-2.61508	0.00892063	0.790429
LINC02202	4.27735	7.42164	3.13608	2.36653	0.0179555	0.790429		EIF3B	94.3531	-6.91012	2.46034	-2.8086	0.00497572	0.790429
LINC02551	4.27735	7.42164	3.13608	2.36653	0.0179555	0.790429		PRRC2A	94.0795	-6.90698	2.54141	-2.71778	0.00657218	0.790429
LINC02666	4.27735	7.42164	3.13608	2.36653	0.0179555	0.790429		PAM	93.9723	-6.9053	2.53399	-2.72507	0.00642873	0.790429
LINC02891	4.27735	7.42164	3.13608	2.36653	0.0179555	0.790429		SPDYE5	93.6915	-6.90082	2.69477	-2.56082	0.0104426	0.790429
LOC100131689	4.27735	7.42164	3.13608	2.36653	0.0179555	0.790429		USP9X	93.5706	-6.89912	2.65872	-2.59491	0.00946168	0.790429
LOC100420513	4.27735	7.42164	3.13608	2.36653	0.0179555	0.790429		CCND1	92.5618	-6.88309	2.49051	-2.76373	0.00571453	0.790429
LOC100422292	4.27735	7.42164	3.13608	2.36653	0.0179555	0.790429		MKI67	504.277	-6.87816	2.34559	-2.93237	0.00336381	0.790429
LOC101927857	4.27735	7.42164	3.13608	2.36653	0.0179555	0.790429		ACACA	92.0775	-6.87605	2.54002	-2.70709	0.00678765	0.790429
LOC101927949	4.27735	7.42164	3.13608	2.36653	0.0179555	0.790429		PCNT	89.86	-6.84029	2.79988	-2.44306	0.0145633	0.790429
LOC102724068	4.27735	7.42164	3.13608	2.36653	0.0179555	0.790429		H2BC18	89.9365	-6.83994	3.1511	-2.17065	0.0299573	0.790429
LOC105370926	4.27735	7.42164	3.13608	2.36653	0.0179555	0.790429		KMT2A	89.4884	-6.83369	2.92396	-2.33714	0.019432	0.790429
LOC105372385	4.27735	7.42164	3.13608	2.36653	0.0179555	0.790429		AARS1	89.1834	-6.82858	2.44818	-2.78925	0.00528302	0.790429
LOC105373873	4.27735	7.42164	3.13608	2.36653	0.0179555	0.790429		OGT	88.8828	-6.82458	2.79879	-2.4384	0.0147523	0.790429
LOC105375150	4.27735	7.42164	3.13608	2.36653	0.0179555	0.790429		ITGB4	88.5983	-6.82054	2.51952	-2.70707	0.00678789	0.790429
LOC105375925	4.27735	7.42164	3.13608	2.36653	0.0179555	0.790429		IRS1	88.5248	-6.81951	2.63722	-2.58587	0.0097133	0.790429
LOC105376161	4.27735	7.42164	3.13608	2.36653	0.0179555	0.790429		LOC105371050	88.3608	-6.81035	2.41202	-2.8235	0.00475028	0.790429
LOC105376171	4.27735	7.42164	3.13608	2.36653	0.0179555	0.790429		TAF15	86.7529	-6.78954	2.47221	-2.74634	0.0060264	0.790429
LOC105376211	4.27735	7.42164	3.13608	2.36653	0.0179555	0.790429		OGA	85.919	-6.77664	2.59493	-2.6115	0.00901471	0.790429
LOC105377191	4.27735	7.42164	3.13608	2.36653	0.0179555	0.790429		MYCBP2	84.3484	-6.74951	2.75676	-2.44835	0.0143514	0.790429
LOC105378005	4.27735	7.42164	3.13608	2.36653	0.0179555	0.790429		MED13L	83.8702	-6.74173	2.68261	-2.51312	0.0119669	0.790429
LOC107985840	4.27735	7.42164	3.13608	2.36653	0.0179555	0.790429		LOC107987244	84.0251	-6.73952	2.41445	-2.79133	0.00524919	0.790429
LOC107986699	4.27735	7.42164	3.13608	2.36653	0.0179555	0.790429		ADAR	83.2178	-6.73029	2.72699	-2.46802	0.0135861	0.790429
LOC112267914	4.27735	7.42164	3.13608	2.36653	0.0179555	0.790429		LOC105377945	83.6375	-6.72953	2.42176	-2.77878	0.00545642	0.790429
LOC391562	4.27735	7.42164	3.13608	2.36653	0.0179555	0.790429		MYCBP2-AS1	83.0517	-6.72726	2.49274	-2.69874	0.00696029	0.790429
MARK2P7	4.27735	7.42164	3.13608	2.36653	0.0179555	0.790429		YEATS2-AS1	83.502	-6.72718	2.42092	-2.77878	0.00545642	0.790429
MIP	4.27735	7.42164	3.13608	2.36653	0.0179555	0.790429		ICAM3	82.7032	-6.70732	2.59404	-2.58566	0.00971926	0.790429
MIR7853	4.27735	7.42164	3.13608	2.36653	0.0179555	0.790429		MST1	80.6669	-6.68575	2.67671	-2.49775	0.0124985	0.790429
NANOGP9	4.27735	7.42164	3.13608	2.36653	0.0179555	0.790429		WASHC5-AS1	80.9386	-6.68449	2.41322	-2.76995	0.00560652	0.790429
NECTIN1-AS1	4.27735	7.42164	3.13608	2.36653	0.0179555	0.790429		KIAA1109	80.554	-6.68339	2.75171	-2.42881	0.0151483	0.790429
NR1H5P	4.27735	7.42164	3.13608	2.36653	0.0179555	0.790429		SEPTIN9	80.4736	-6.68077	2.45145	-2.72523	0.00642574	0.790429
NRXN1	4.27735	7.42164	3.13608	2.36653	0.0179555	0.790429		CYB561D2	80.2789	-6.67324	2.41369	-2.76474	0.00569677	0.790429
PAPOLA-DT	4.27735	7.42164	3.13608	2.36653	0.0179555	0.790429		SPDYE1	79.7344	-6.66918	2.545	-2.6205	0.00877997	0.790429
PARTICL	4.27735	7.42164	3.13608	2.36653	0.0179555	0.790429		FN1	79.717	-6.66887	2.54523	-2.62015	0.00878912	0.790429
PCDH10	4.27735	7.42164	3.13608	2.36653	0.0179555	0.790429		WNK1	78.9729	-6.65404	2.46182	-2.7029	0.00687379	0.790429
PRR34-AS1	4.27735	7.42164	3.13608	2.36653	0.0179555	0.790429		GOLGA4	78.6579	-6.64933	2.71984	-2.44475	0.0144951	0.790429
RDH10-AS1	4.27735	7.42164	3.13608	2.36653	0.0179555	0.790429		MYC	78.3721	-6.64305	2.46145	-2.69884	0.00695823	0.790429
RNU5E-4P	4.27735	7.42164	3.13608	2.36653	0.0179555	0.790429		ERI1	77.896	-6.63549	2.5257	-2.62719	0.00860927	0.790429
RNU6-882P	4.27735	7.42164	3.13608	2.36653	0.0179555	0.790429		ZBTB17	78.6444	-6.63422	2.83787	-2.33775	0.0194003	0.790429
SAMD9L	4.27735	7.42164	3.13608	2.36653	0.0179555	0.790429		SMARCA4	77.4643	-6.62761	2.54204	-2.6072	0.00912867	0.790429
SCARNA2	4.27735	7.42164	3.13608	2.36653	0.0179555	0.790429		NUP188	77.1989	-6.62281	2.58193	-2.56507	0.0103156	0.790429
SLC26A9-AS1	4.27735	7.42164	3.13608	2.36653	0.0179555	0.790429		MTUS1	76.757	-6.61459	2.61831	-2.52628	0.0115276	0.790429
SNAI3-AS1	4.27735	7.42164	3.13608	2.36653	0.0179555	0.790429		CHD7	76.5435	-6.60981	2.78279	-2.37525	0.0175372	0.790429
SPEM3	4.27735	7.42164	3.13608	2.36653	0.0179555	0.790429		PLEC	418.624	-6.60909	2.23066	-2.96284	0.00304814	0.790429
STRADBP1	4.27735	7.42164	3.13608	2.36653	0.0179555	0.790429		CREBBP	76.3021	-6.60549	2.7475	-2.40418	0.0162087	0.790429
TLE4	4.27735	7.42164	3.13608	2.36653	0.0179555	0.790429		IPO5	76.2436	-6.60474	2.53065	-2.6099	0.00905684	0.790429
TRIM71	4.27735	7.42164	3.13608	2.36653	0.0179555	0.790429		ATM	75.3394	-6.58762	2.66844	-2.46872	0.0135598	0.790429
TRP-AGG2-4	4.27735	7.42164	3.13608	2.36653	0.0179555	0.790429		KDM1A	75.1791	-6.58416	2.49936	-2.63434	0.00843022	0.790429
TRQ-TTG1-1	4.27735	7.42164	3.13608	2.36653	0.0179555	0.790429		DXO	74.8903	-6.57795	2.47012	-2.66301	0.00774444	0.790429
TSBP1-AS1	4.27735	7.42164	3.13608	2.36653	0.0179555	0.790429		CHD8	74.7532	-6.57656	2.63215	-2.49855	0.0124703	0.790429
YAE1-DT	4.27735	7.42164	3.13608	2.36653	0.0179555	0.790429		IPO7	74.3689	-6.56738	2.45693	-2.673	0.0075177	0.790429
ANKRD18CP	7.19457	7.235	2.47262	2.92605	0.00343301	0.790429		PYGL	74.0184	-6.56239	2.58021	-2.54336	0.0109793	0.790429
HEATR6-DT	233.025	7.21466	2.81114	2.56645	0.0102745	0.790429		DDX17	73.9937	-6.56128	2.49949	-2.62504	0.0086638	0.790429
LOC286059	9.04471	7.21232	2.71998	2.65161	0.00801096	0.790429		SERHL2	74.1278	-6.55874	2.41836	-2.71206	0.00668666	0.790429
PRAMEF14	9.04471	7.21232	2.71998	2.65161	0.00801096	0.790429		LOC105371049	74.464	-6.55797	2.46912	-2.65599	0.00790754	0.790429
WFDC21P	9.04471	7.21232	2.71998	2.65161	0.00801096	0.790429		LOC101928371	73.8909	-6.55413	2.41674	-2.71197	0.00668852	0.790429
TERC	7.20645	7.16282	2.46434	2.90658	0.00365402	0.790429		HECTD1	73.3443	-6.54848	2.77826	-2.35704	0.0184213	0.790429
BORCS7	7.61893	6.93606	2.79891	2.47813	0.0132074	0.790429		CHRNE	73.6469	-6.53906	2.5886	-2.5261	0.0115337	0.790429
LOC105371056	7.61893	6.93606	2.79891	2.47813	0.0132074	0.790429		SMC1A	72.5812	-6.53424	2.61281	-2.50085	0.0123895	0.790429
LOC648987	23.7925	6.92582	2.58683	2.67734	0.00742085	0.790429		TARS1	72.4074	-6.5305	2.52443	-2.58692	0.00968369	0.790429
CPEB1	5.76879	6.91243	2.59158	2.66726	0.00764723	0.790429		PHF3	72.1414	-6.52474	2.77733	-2.34928	0.0188095	0.790429
HMSD	5.76879	6.91243	2.59158	2.66726	0.00764723	0.790429		TXNRD1	71.9324	-6.52114	2.5422	-2.56516	0.0103129	0.790429
LOC105372884	5.76879	6.91243	2.59158	2.66726	0.00764723	0.790429		SMAD3	71.7668	-6.51804	2.58593	-2.52058	0.0117161	0.790429
SHISAL2B	5.76879	6.91243	2.59158	2.66726	0.00764723	0.790429		ATRX	71.4457	-6.51123	2.71043	-2.40228	0.0162931	0.790429
LOC105379574	29.1359	6.87682	2.24789	3.05923	0.00221904	0.790429		TFAP2A-AS2	71.5509	-6.50888	2.42604	-2.68292	0.0072982	0.790429
STAG2-AS1	42.8177	6.77588	2.59698	2.60914	0.00907695	0.790429		LOC107985013	71.7617	-6.50523	2.45601	-2.6487	0.00808024	0.790429
FAM110D	8.70977	6.76023	2.39342	2.82451	0.00473529	0.790429		EPHX1	70.3681	-6.48931	2.51319	-2.5821	0.00982013	0.790429
LOC112268231	7.26023	6.60633	2.45716	2.68861	0.00717506	0.790429		LRRC4	69.9394	-6.4799	2.82422	-2.2944	0.0217673	0.790429
DDX11L10	6.19314	6.59604	2.90871	2.26769	0.0233482	0.790429		CPZ	70.0914	-6.47971	2.43589	-2.6601	0.00781178	0.790429
LOC105373968	6.19314	6.59604	2.90871	2.26769	0.0233482	0.790429		NOLC1	69.8662	-6.47887	2.50474	-2.58665	0.0096914	0.790429
LOC112267871	6.19314	6.59604	2.90871	2.26769	0.0233482	0.790429		H2BC12	69.8165	-6.47562	3.12933	-2.06933	0.0385151	0.790429
MAN1B1-DT	6.19314	6.59604	2.90871	2.26769	0.0233482	0.790429		DNMBP	69.5466	-6.47276	2.6589	-2.43437	0.0149176	0.790429
MYH16	6.19314	6.59604	2.90871	2.26769	0.0233482	0.790429		SACS	69.6034	-6.47123	3.1298	-2.06762	0.0386759	0.790429
RPL9P32	6.19314	6.59604	2.90871	2.26769	0.0233482	0.790429		FRAS1	69.2208	-6.46586	2.68224	-2.41062	0.0159256	0.790429
LOC105370008	66.6103	6.49684	2.69058	2.41466	0.0157499	0.790429		H2BC5	69.2598	-6.4641	3.12897	-2.06589	0.0388391	0.790429
ABCD2	4.34301	6.4964	2.77545	2.34067	0.0192492	0.790429		FAN1	69.1073	-6.4635	2.52738	-2.55739	0.010546	0.790429
LOC105376037	4.34301	6.4964	2.77545	2.34067	0.0192492	0.790429		SUPT6H	68.9958	-6.46147	2.57929	-2.50513	0.0122406	0.790429
PIRT	4.34301	6.4964	2.77545	2.34067	0.0192492	0.790429		TPX2	68.7489	-6.45602	2.52669	-2.55513	0.0106149	0.790429
ZNF114-AS1	4.34301	6.4964	2.77545	2.34067	0.0192492	0.790429		SLC38A2	68.9017	-6.45501	2.4263	-2.66043	0.00780409	0.790429
LOC103171574	7.28398	6.49493	2.48025	2.61865	0.00882775	0.790429		ARHGAP18	68.2477	-6.44577	2.63766	-2.44374	0.0145358	0.790429
CSF2RB	4.35488	6.41522	2.76634	2.31903	0.0203936	0.790429		OSBPL8	67.5169	-6.42928	2.82074	-2.27929	0.0226499	0.790429
LOC105378450	4.35488	6.41522	2.76634	2.31903	0.0203936	0.790429		COL10A1	67.268	-6.42343	2.89746	-2.21692	0.0266288	0.790429
TSSC4	22.0133	6.36575	1.76393	3.60884	0.000307563	0.364278		OR51B6	66.6921	-6.41247	2.67668	-2.39568	0.0165897	0.790429
LOC100190934	16.6636	6.32258	2.6674	2.37032	0.0177728	0.790429		ANAPC10	66.5664	-6.40974	2.53352	-2.52997	0.0114073	0.790429
SUMO2P1	5.83445	6.2848	2.57901	2.43691	0.0148136	0.790429		ECH1	66.6755	-6.40795	2.42947	-2.6376	0.00834957	0.790429
LOC107987063	98.0993	6.2807	2.47286	2.53985	0.0110898	0.790429		CLSTN1	66.4758	-6.40415	2.43379	-2.63135	0.00850463	0.790429
ABCA17P	5.84632	6.23109	2.32343	2.68185	0.00732159	0.790429		ADNP	65.9918	-6.39746	2.65313	-2.41128	0.0158965	0.790429
SLC25A34	5.8582	6.17004	2.60274	2.3706	0.0177594	0.790429		GIGYF2	65.7874	-6.3926	2.73037	-2.34129	0.019217	0.790429
RNU2-13P	15.2379	6.16646	2.69179	2.29084	0.0219729	0.790429		NSD2	65.7491	-6.39228	2.60087	-2.45775	0.0139811	0.790429
TRIM80P	7.69646	6.15503	2.44033	2.52221	0.0116618	0.790429		LOC105372486	66.1715	-6.39123	2.44061	-2.61869	0.00882669	0.790429
CUBNP2	4.76736	6.15466	3.07303	2.0028	0.0451992	0.790429		LOC100652999	65.9841	-6.38962	2.4194	-2.64099	0.00826636	0.790429
DST-AS1	4.76736	6.15466	3.07303	2.0028	0.0451992	0.790429		DCBLD1	65.2634	-6.38026	2.47755	-2.57523	0.0100174	0.790429
LINC00561	4.76736	6.15466	3.07303	2.0028	0.0451992	0.790429		LRRC37A2	65.246	-6.37944	2.46643	-2.58651	0.00969545	0.790429
LMLN2	4.76736	6.15466	3.07303	2.0028	0.0451992	0.790429		DOCK1	64.8655	-6.37231	2.72844	-2.33552	0.0195165	0.790429
LOC100288798	4.76736	6.15466	3.07303	2.0028	0.0451992	0.790429		UBAP2L	64.5982	-6.36617	2.76526	-2.30219	0.0213243	0.790429
LOC102723733	4.76736	6.15466	3.07303	2.0028	0.0451992	0.790429		STIL	64.6007	-6.36397	3.12299	-2.03778	0.0415723	0.790429
LOC105369634	4.76736	6.15466	3.07303	2.0028	0.0451992	0.790429		PCDH12	64.3937	-6.36191	2.51911	-2.52546	0.0115547	0.790429
LOC105370991	4.76736	6.15466	3.07303	2.0028	0.0451992	0.790429		SAFB	64.4094	-6.36146	2.48228	-2.56275	0.0103846	0.790429
LOC105374358	4.76736	6.15466	3.07303	2.0028	0.0451992	0.790429		SERBP1	64.7774	-6.36106	2.42531	-2.62278	0.00872161	0.790429
LOC105379507	4.76736	6.15466	3.07303	2.0028	0.0451992	0.790429		ARAP1-AS2	64.57	-6.34776	2.61784	-2.42481	0.0153164	0.790429
LOC107987072	4.76736	6.15466	3.07303	2.0028	0.0451992	0.790429		LOC105378552	63.3382	-6.33861	2.58203	-2.45489	0.0140927	0.790429
LOC285593	4.76736	6.15466	3.07303	2.0028	0.0451992	0.790429		LCTL	63.5078	-6.33661	2.42417	-2.61393	0.00895078	0.790429
LOC441750	4.76736	6.15466	3.07303	2.0028	0.0451992	0.790429		NOXO1	64.0672	-6.33613	2.75325	-2.30133	0.0213732	0.790429
MRLN	4.76736	6.15466	3.07303	2.0028	0.0451992	0.790429		ALX3	64.0245	-6.3352	2.65651	-2.38479	0.017089	0.790429
MYH9-DT	4.76736	6.15466	3.07303	2.0028	0.0451992	0.790429		RBM5-AS1	63.4023	-6.33422	2.42695	-2.60995	0.0090555	0.790429
OTUD6B-AS1	4.76736	6.15466	3.07303	2.0028	0.0451992	0.790429		PPP1CC	62.843	-6.32685	2.51681	-2.51384	0.0119425	0.790429
RPL23AP94	4.76736	6.15466	3.07303	2.0028	0.0451992	0.790429		CARD14	63.2593	-6.32668	2.42692	-2.60688	0.00913719	0.790429
SPDYE14	4.76736	6.15466	3.07303	2.0028	0.0451992	0.790429		DUOX1	62.7382	-6.32487	2.64718	-2.38929	0.0168812	0.790429
LINC00612	7.33777	6.1337	2.18183	2.81126	0.00493473	0.790429		RSL1D1	62.6243	-6.32225	2.55561	-2.47387	0.0133659	0.790429
LINC02939	16.7412	6.08346	2.33153	2.60922	0.00907498	0.790429		H2BC4	62.5844	-6.31978	2.89092	-2.18607	0.0288101	0.790429
LOC107984952	15.3035	5.99482	2.34708	2.55416	0.0106443	0.790429		MGA	62.3547	-6.31602	2.64797	-2.38523	0.0170684	0.790429
C16orf95	4.40867	5.87021	2.76563	2.12256	0.0337906	0.790429		HNRNPR	61.9551	-6.30637	2.51725	-2.50526	0.012236	0.790429
LOC101927278	4.40867	5.87021	2.76563	2.12256	0.0337906	0.790429		ARHGAP12	61.7245	-6.3013	2.69304	-2.33985	0.0192915	0.790429
EPHA2-AS1	58.3685	5.83281	1.47691	3.94932	7.83741e-05	0.222651		HPS4	62.075	-6.29353	2.48833	-2.52922	0.0114318	0.790429
PARP2	881.763	5.81584	1.23244	4.71896	2.37051e-06	0.0461103		AFAP1-AS1	61.2363	-6.28424	2.43354	-2.58234	0.0098132	0.790429
GSTA2	4.42054	5.8142	2.47915	2.34524	0.019015	0.790429		RCN1P2	61.5143	-6.27769	2.58543	-2.4281	0.015178	0.790429
NPAS4	4.42054	5.8142	2.47915	2.34524	0.019015	0.790429		GNG3	60.8464	-6.27715	2.4402	-2.57239	0.0101	0.790429
RORC	4.42054	5.8142	2.47915	2.34524	0.019015	0.790429		MTX1P1	61.4439	-6.27585	2.85951	-2.19473	0.0281829	0.790429
LINC00910	6.27068	5.81329	2.53699	2.29142	0.0219394	0.790429		CCT2	60.6238	-6.27556	2.5526	-2.4585	0.013952	0.790429
LINC02255	6.27068	5.81329	2.53699	2.29142	0.0219394	0.790429		NR2C2	60.9751	-6.27291	2.42985	-2.5816	0.00983423	0.790429
MITF	5.91198	5.81317	2.28391	2.54527	0.0109194	0.790429		HYI	61.0225	-6.26642	2.56311	-2.44485	0.0144912	0.790429
RPL3L	5.92386	5.77124	2.29271	2.51722	0.0118286	0.790429		USP7	59.8973	-6.25742	2.49626	-2.50671	0.0121859	0.790429
GUCY1B1	4.43242	5.75096	2.78961	2.06156	0.0392493	0.790429		PSMC5	59.7751	-6.25355	2.47066	-2.53113	0.0113696	0.790429
LINC01585	4.43242	5.75096	2.78961	2.06156	0.0392493	0.790429		H2AC13	59.5539	-6.24704	3.11653	-2.00449	0.0450181	0.790429
LIPF	4.43242	5.75096	2.78961	2.06156	0.0392493	0.790429		ZNF638	59.3318	-6.2447	2.66281	-2.34515	0.0190192	0.790429
LOC100272217	4.43242	5.75096	2.78961	2.06156	0.0392493	0.790429		TOP2A	59.3028	-6.24409	2.64071	-2.36455	0.0180518	0.790429
NKX2-5	7.45721	5.61616	2.54445	2.20722	0.0272988	0.790429		CRB2	60.0682	-6.2437	2.96954	-2.10258	0.0355026	0.790429
TMEM255A	7.49284	5.49919	2.12003	2.59392	0.00948875	0.790429		MYO15A	59.1241	-6.2398	2.60388	-2.39634	0.0165595	0.790429
MMP24OS	6.32446	5.43092	2.44527	2.22099	0.0263516	0.790429		LARS1	59.1182	-6.2391	2.51822	-2.47758	0.0132277	0.790429
FLT1	6.33634	5.4265	2.24275	2.41957	0.015539	0.790429		LOC107984263	58.8084	-6.23002	2.46896	-2.52334	0.0116246	0.790429
ST13P10	6.33634	5.4265	2.24275	2.41957	0.015539	0.790429		PLIN4	58.7326	-6.22728	2.45325	-2.53838	0.0111368	0.790429
NREP	9.03806	5.39623	2.04376	2.64035	0.00828212	0.790429		LOC107985873	58.614	-6.22069	2.42594	-2.56424	0.0103403	0.790429
LOC105374325	4.8449	5.37153	2.67571	2.00752	0.0446948	0.790429		PGD	57.9573	-6.2108	2.53694	-2.44815	0.0143592	0.790429
LOC645139	4.8449	5.37153	2.67571	2.00752	0.0446948	0.790429		CTTN	57.5573	-6.20098	2.68521	-2.30931	0.0209262	0.790429
LOC107985216	4.49808	5.35681	2.44815	2.18811	0.0286617	0.790429		STT3A	57.4072	-6.19459	2.45585	-2.52238	0.0116562	0.790429
LOC105373689	7.54662	5.31822	2.10972	2.52081	0.0117084	0.790429		GANAB	57.1564	-6.18991	2.49028	-2.48563	0.0129322	0.790429
ALDOA	7.5585	5.29068	2.08967	2.53182	0.0113472	0.790429		PCM1	57.0487	-6.18683	2.88273	-2.14617	0.0318592	0.790429
ARTN	7.57037	5.26775	2.12476	2.47922	0.013167	0.790429		MUC6	56.9625	-6.18631	2.61757	-2.36338	0.0181092	0.790429
LOC112268269	13.6675	5.25899	1.85869	2.82941	0.00466338	0.790429		GBF1	56.7855	-6.18098	2.50501	-2.46745	0.0136081	0.790429
FLT3LG	6.05518	5.21093	2.21263	2.35508	0.0185187	0.790429		FUS	56.6668	-6.17749	2.48984	-2.48108	0.0130984	0.790429
YIF1B	3116.41	5.20521	1.65154	3.15174	0.00162302	0.790429		LOC101929162	56.8852	-6.17532	2.42659	-2.54486	0.0109322	0.790429
NDUFAF3	54.1955	5.18649	1.37365	3.77571	0.000159552	0.285318		DHX15	56.5234	-6.17523	2.63615	-2.34252	0.0191538	0.790429
SMG1P5	18.7698	5.15402	1.7294	2.98024	0.00288025	0.790429		IGF2R	56.4588	-6.17253	2.80244	-2.20256	0.0276259	0.790429
POU6F1	7.61228	5.1387	2.11447	2.43026	0.0150881	0.790429		CEP250-AS1	56.3346	-6.16881	2.48162	-2.4858	0.012926	0.790429
CA3-AS1	27.6388	5.11454	1.74446	2.93188	0.00336922	0.790429		PRC1	56.2576	-6.16847	2.58485	-2.38639	0.0170147	0.790429
LOC107984974	479.164	5.11113	2.53406	2.01697	0.0436986	0.790429		LOC112268182	56.177	-6.1657	2.75158	-2.24079	0.0250397	0.790429
LOC101930112	6.39012	5.09474	2.41915	2.106	0.035204	0.790429		SBF2	56.0485	-6.16307	2.56838	-2.3996	0.0164131	0.790429
MEIG1	4.55186	5.0879	2.43562	2.08895	0.036712	0.790429		PARP4	56.0411	-6.16297	2.6168	-2.35516	0.0185148	0.790429
SIRT4	26.1837	5.04568	1.74408	2.89304	0.00381535	0.790429		LOC107985487	55.8907	-6.15813	2.50332	-2.45998	0.0138945	0.790429
LOC100420878	6.10896	5.03674	2.30211	2.18788	0.0286783	0.790429		SRSF11	56.085	-6.15692	2.43118	-2.53248	0.0113258	0.790429
WDR38	688.108	5.00357	1.45241	3.44502	0.000571019	0.538318		CDK5RAP2	55.7795	-6.15556	2.75034	-2.23811	0.025214	0.790429
MED15P9	6.42575	4.96583	2.44797	2.02855	0.0425046	0.790429		FOXM1	55.8614	-6.1551	2.45336	-2.50885	0.0121125	0.790429
DNAJC24	99.3158	4.91035	1.56879	3.13002	0.00174794	0.790429		SMC3	55.7013	-6.15424	2.5981	-2.36875	0.0178485	0.790429
CTRC	9.5162	4.89493	1.96987	2.4849	0.0129588	0.790429		EYS	55.6314	-6.15234	2.56853	-2.39528	0.0166079	0.790429
RPS10P19	23.7093	4.84934	1.50654	3.21886	0.001287	0.790429		ZSWIM8	55.5037	-6.14901	2.56672	-2.39567	0.0165899	0.790429
TNFSF4	4.61752	4.83819	2.44224	1.98104	0.0475863	0.790429		LOC102724723	55.4696	-6.14245	2.43708	-2.52042	0.0117215	0.790429
TPM3P1	4.61752	4.83819	2.44224	1.98104	0.0475863	0.790429		EP400	55.0845	-6.13752	2.75032	-2.23157	0.0256435	0.790429
TAF5	556.814	4.83025	1.3292	3.63395	0.000279119	0.353118		LRRC37A	55.043	-6.13718	2.61302	-2.34869	0.0188397	0.790429
SERTAD1	30.1826	4.79981	1.52775	3.14175	0.00167941	0.790429		SPDYE6	54.9235	-6.13295	2.80014	-2.19023	0.0285076	0.790429
HBEGF	8.02476	4.77873	2.03036	2.35364	0.0185905	0.790429		SETD2	54.8892	-6.13208	2.79962	-2.19033	0.0285003	0.790429
RPL23AP42	4.64127	4.77269	2.37236	2.01179	0.0442422	0.790429		ARHGAP35	54.692	-6.128	2.59504	-2.36143	0.0182046	0.790429
RPL9	480.061	4.7669	2.22717	2.14034	0.0323273	0.790429		ATP2C2	54.5883	-6.12279	2.46681	-2.48207	0.0130622	0.790429
SLC2A9	9.36636	4.73354	2.08885	2.2661	0.0234451	0.790429		HORMAD2-AS1	54.4678	-6.12175	2.53971	-2.41042	0.0159342	0.790429
RPL35	417.377	4.67415	1.20547	3.87746	0.000105553	0.266544		PUM1	54.4932	-6.12165	2.80007	-2.18625	0.0287977	0.790429
LOC107984932	4.97622	4.67158	2.29085	2.03924	0.0414264	0.790429		CUL9	54.3399	-6.11843	2.6808	-2.28232	0.0224707	0.790429
ZDHHC1	6.25216	4.66822	2.21963	2.10315	0.0354528	0.790429		ATP2A2	54.0781	-6.10945	2.47367	-2.46979	0.0135193	0.790429
CRYM	6.29966	4.58675	2.24386	2.04413	0.0409409	0.790429		KDM3B	53.9215	-6.10763	2.59323	-2.35522	0.0185119	0.790429
LOC107987209	2158.26	4.56402	1.64556	2.77354	0.005545	0.790429		LOC107985544	54.1022	-6.10754	2.44073	-2.50234	0.0123374	0.790429
MRS2P2	9.71318	4.53052	1.98452	2.28293	0.0224344	0.790429		VCAN	53.869	-6.10453	2.87814	-2.121	0.0339221	0.790429
KLHL33	11.3059	4.52388	1.74638	2.59043	0.00958565	0.790429		BDP1	53.837	-6.10364	2.87807	-2.12074	0.0339437	0.790429
ZNF232	69.891	4.49935	1.4643	3.0727	0.00212135	0.790429		ABHD16B	54.4682	-6.10325	2.50873	-2.43281	0.0149822	0.790429
CEBPA	6.34157	4.47812	2.15171	2.08119	0.0374167	0.790429		CCAR1	53.6544	-6.10023	2.55037	-2.3919	0.0167613	0.790429
LRTOMT	1667.5	4.47305	1.80477	2.47845	0.0131953	0.790429		MCM3	53.5737	-6.09798	2.53856	-2.40214	0.0162993	0.790429
GDF9	314.613	4.46861	1.53756	2.9063	0.00365732	0.790429		HLTF-AS1	53.3959	-6.09347	2.57733	-2.36425	0.0180664	0.790429
PDZD11	16.6475	4.45029	1.92151	2.31604	0.0205562	0.790429		ZMYM4-AS1	53.3313	-6.09184	2.59204	-2.35021	0.0187629	0.790429
LHX5	6.59898	4.44967	2.1124	2.10645	0.0351655	0.790429		BTBD18	53.2967	-6.09051	2.70743	-2.24956	0.024477	0.790429
SH3TC2	7.97621	4.4128	2.03339	2.17017	0.0299942	0.790429		AP3D1	53.2203	-6.0871	2.48419	-2.45034	0.0142723	0.790429
FAM86LP	13.4253	4.35129	1.87965	2.31494	0.0206161	0.790429		MKNK1-AS1	53.8082	-6.08332	2.57947	-2.35836	0.0183559	0.790429
MYG1-AS1	3402.47	4.3445	1.44314	3.01045	0.00260858	0.790429		VPS13D	52.9656	-6.08086	2.79776	-2.17347	0.029745	0.790429
PANK2-AS1	14.6884	4.32848	1.63412	2.64882	0.00807739	0.790429		DIAPH1	52.8968	-6.08011	2.5921	-2.34564	0.0189947	0.790429
ZNF593OS	1685.38	4.32686	1.53785	2.81357	0.00489946	0.790429		C11orf65	52.8108	-6.07777	2.62795	-2.31274	0.0207367	0.790429
SYCE1L	16.2388	4.26497	1.8219	2.34094	0.0192352	0.790429		YARS1	52.6811	-6.07235	2.48295	-2.44562	0.0144602	0.790429
TMEM141	11.3586	4.24659	1.9191	2.2128	0.0269113	0.790429		PRR14L	52.3606	-6.06445	2.79602	-2.16896	0.0300857	0.790429
PEAK3	13.1613	4.24575	1.66657	2.5476	0.0108466	0.790429		EDRF1-AS1	52.1844	-6.05734	2.45784	-2.4645	0.0137204	0.790429
TSPO	16.6342	4.21928	1.5873	2.65815	0.00785716	0.790429		NCOA4	52.3585	-6.05655	2.43129	-2.49108	0.0127355	0.790429
SPACA4	8.55041	4.20911	1.99718	2.10752	0.0350721	0.790429		PNN	52.016	-6.05514	2.51412	-2.40845	0.0160204	0.790429
SEPTIN9-DT	8.14316	4.17955	2.03607	2.05276	0.0400962	0.790429		AFDN	51.9556	-6.05368	2.524	-2.39844	0.0164649	0.790429
ARMC7	238.207	4.17773	1.96587	2.12513	0.0335756	0.790429		ITGA6	51.8983	-6.05278	2.60641	-2.32227	0.0202183	0.790429
HECW2	9.81342	4.15884	2.02205	2.05675	0.0397105	0.790429		MXRA8	52.4006	-6.04558	2.55341	-2.36765	0.0179013	0.790429
TMCO6	1540.88	4.11576	1.38008	2.98227	0.0028612	0.790429		BUB1B	51.6482	-6.04477	2.79423	-2.16331	0.0305177	0.790429
PBLD	8.66985	4.03677	1.91098	2.11241	0.0346512	0.790429		THOC2	51.6126	-6.04418	2.52652	-2.3923	0.0167432	0.790429
PCP2	39.1464	4.02414	1.47318	2.73159	0.00630293	0.790429		MED1	51.3915	-6.03781	2.51363	-2.40203	0.0163044	0.790429
LOC107985923	37.6822	4.02021	1.86804	2.1521	0.0313894	0.790429		GPR162	51.0164	-6.02753	2.74158	-2.19856	0.0279089	0.790429
LOC100287402	12.1546	4.01364	1.80982	2.2177	0.0265752	0.790429		SRCAP	50.819	-6.02157	2.7925	-2.15633	0.0310577	0.790429
MIF-AS1	28339.4	3.98875	1.50046	2.65836	0.00785222	0.790429		CCDC47	50.628	-6.01627	2.51267	-2.39437	0.016649	0.790429
LOC105372480	151.725	3.97077	1.8386	2.15967	0.0307981	0.790429		NUFIP2	50.3363	-6.00897	2.6042	-2.30741	0.021032	0.790429
RPS17	176.447	3.91653	1.36888	2.86112	0.00422147	0.790429		DKC1	50.0291	-5.99937	2.51966	-2.38102	0.0172646	0.790429
NUDT8	8.55564	3.91554	1.82417	2.14648	0.0318348	0.790429		CEPT1	50.669	-5.99562	2.60232	-2.30396	0.0212251	0.790429
MIR762HG	1151.43	3.88584	1.72228	2.25621	0.0240573	0.790429		IK	49.8283	-5.99048	2.45636	-2.43876	0.0147376	0.790429
UQCC2	26.1765	3.85991	1.55641	2.48	0.0131381	0.790429		MED14OS	49.342	-5.98018	2.66858	-2.24096	0.0250289	0.790429
LOC102724916	198.451	3.85807	1.60507	2.40367	0.0162312	0.790429		GMPS	49.0606	-5.97186	2.55301	-2.33914	0.0193281	0.790429
NME1	33.1764	3.85544	1.67421	2.30284	0.0212879	0.790429		ADGRG6	48.9889	-5.9697	2.69885	-2.21194	0.0269708	0.790429
LOC105371814	10.6632	3.84842	1.8702	2.05776	0.0396133	0.790429		GTF3C1	48.624	-5.95927	2.58205	-2.30796	0.0210013	0.790429
PRR34	66.0871	3.83708	1.85934	2.06367	0.0390487	0.790429		INO80-AS1	48.6115	-5.95631	2.47679	-2.40485	0.0161791	0.790429
HINT1	112.549	3.83475	1.34824	2.84426	0.0044514	0.790429		NFE2L1	48.3757	-5.9515	2.53917	-2.34388	0.0190843	0.790429
NDUFB2-AS1	1005.35	3.83062	1.53068	2.50256	0.0123299	0.790429		CDC42BPB	48.2321	-5.94757	2.66613	-2.23079	0.0256949	0.790429
MXD3	3107.38	3.80062	1.6606	2.2887	0.0220965	0.790429		MYH14	48.2084	-5.94629	2.5266	-2.35347	0.018599	0.790429
LSM3	24.4091	3.80038	1.46101	2.6012	0.00928974	0.790429		LOC101927978	48.1881	-5.94604	2.55175	-2.33018	0.0197964	0.790429
LOC105374809	212.344	3.78418	1.45043	2.60901	0.00908058	0.790429		HERC2	48.1126	-5.94401	2.66591	-2.22964	0.0257716	0.790429
DUSP8	6.98666	3.77644	1.92253	1.96431	0.0494942	0.790429		RIF1	48.1035	-5.94212	2.86814	-2.07177	0.0382872	0.790429
MAPK4	6.98666	3.77644	1.92253	1.96431	0.0494942	0.790429		DOCK5	48.0037	-5.9403	2.73545	-2.1716	0.029886	0.790429
KRT7-AS	125.18	3.77542	1.24264	3.03823	0.00237976	0.790429		IARS2	48.081	-5.93826	2.45111	-2.42269	0.0154063	0.790429
NEMP1	17.4277	3.74084	1.54017	2.42885	0.0151469	0.790429		CC2D2A	47.9003	-5.93783	2.61748	-2.26853	0.0232968	0.790429
DNAH7	26.6613	3.74081	1.70756	2.19073	0.0284716	0.790429		SUN1	47.7442	-5.93307	2.59808	-2.28364	0.0223926	0.790429
GLRX	8.75261	3.6971	1.80105	2.05274	0.0400974	0.790429		MCM2	47.7309	-5.93267	2.63977	-2.24742	0.024613	0.790429
GADD45B	12.2007	3.68981	1.68992	2.18343	0.0290045	0.790429		MBTPS1	47.3828	-5.92184	2.54991	-2.32237	0.0202128	0.790429
TRHDE-AS1	35.4125	3.68793	1.41728	2.60211	0.0092653	0.790429		KIF1C	47.4362	-5.92143	2.48016	-2.38752	0.0169624	0.790429
TROAP-AS1	260.954	3.68065	1.58572	2.32113	0.02028	0.790429		TRIM25	47.3546	-5.91037	2.43739	-2.42488	0.0153135	0.790429
HES6	18.069	3.66719	1.8315	2.00229	0.0452534	0.790429		CHD3	46.9543	-5.90797	2.51687	-2.34735	0.0189075	0.790429
TBL3	280.951	3.66315	1.74972	2.09356	0.036299	0.790429		MYO6	46.856	-5.90623	2.61508	-2.25853	0.0239126	0.790429
TTLL13	10.7278	3.63643	1.81114	2.00782	0.0446629	0.790429		SRRM1	46.8581	-5.9062	2.5785	-2.29055	0.0219893	0.790429
ZNF668	21.6365	3.63267	1.63432	2.22274	0.0262333	0.790429		ANP32A	47.2254	-5.90392	2.43951	-2.42012	0.0155153	0.790429
RPS9	189.321	3.57814	1.24721	2.86892	0.00411877	0.790429		HUWE1	257.12	-5.90373	2.11237	-2.79484	0.00519261	0.790429
LAMTOR4	19.6707	3.52255	1.51747	2.32133	0.0202688	0.790429		COPG1	47.0329	-5.90336	2.43537	-2.424	0.0153504	0.790429
ZNF706	36.0795	3.49591	1.37838	2.53624	0.0112048	0.790429		AATF	46.816	-5.90245	2.47896	-2.38101	0.0172651	0.790429
GPR137	386.265	3.47391	1.7035	2.03928	0.0414219	0.790429		PDLIM5	46.6525	-5.89885	2.51286	-2.34747	0.0189016	0.790429
LOC101927825	370.303	3.46759	1.74264	1.98985	0.046607	0.790429		ZMYM4	46.4984	-5.89509	2.57723	-2.28738	0.0221739	0.790429
HES4	12.7264	3.46237	1.68277	2.05754	0.039634	0.790429		SREBF2	46.5868	-5.89448	2.47026	-2.38618	0.0170246	0.790429
CYBA	71.2231	3.46094	1.46616	2.36054	0.0182482	0.790429		NUP98	46.4704	-5.89262	2.86578	-2.0562	0.0397629	0.790429
RRP7A	25.7468	3.43536	1.50831	2.27763	0.0227487	0.790429		ACTN1	46.3126	-5.888	2.50229	-2.35305	0.0186202	0.790429
CENPX	14.7378	3.41741	1.58943	2.15009	0.0315481	0.790429		CALHM2	46.8379	-5.88344	2.52609	-2.32907	0.0198554	0.790429
ACYP2	20.3592	3.41259	1.53801	2.21884	0.0264975	0.790429		CIAO3	46.3184	-5.87976	2.43403	-2.41564	0.0157074	0.790429
SMPD4BP	20.0109	3.39855	1.51685	2.24054	0.0250562	0.790429		PDCD6IP	45.9917	-5.87921	2.56097	-2.2957	0.0216931	0.790429
UXT-AS1	684.935	3.38655	1.51017	2.24249	0.0249296	0.790429		NSUN5P2	46.0698	-5.86465	2.46165	-2.3824	0.0172	0.790429
TRIP6	46.0556	3.35961	1.32512	2.53533	0.0112342	0.790429		ARHGAP5	45.5467	-5.86278	2.47955	-2.36445	0.0180569	0.790429
MCRIP2	16.7308	3.32187	1.56631	2.12083	0.0339363	0.790429		AKAP12	1000.83	-5.86255	1.54442	-3.79595	0.000147077	0.285318
NSUN4	21.9854	3.32016	1.63088	2.03581	0.0417694	0.790429		LAMB1	45.4891	-5.86215	2.50065	-2.34425	0.0190655	0.790429
RPL27	78.2647	3.29957	1.28973	2.55834	0.0105172	0.790429		KAT6A	45.4265	-5.86176	2.59528	-2.25862	0.023907	0.790429
SNRPG	18.6637	3.27819	1.51816	2.15932	0.0308255	0.790429		LOC105373925	46.0573	-5.86131	2.48718	-2.35661	0.0184426	0.790429
FKBP3	80.5018	3.26427	1.26556	2.5793	0.00990009	0.790429		RPA1	45.443	-5.85991	2.48385	-2.35921	0.018314	0.790429
RIDA	16.874	3.26355	1.55764	2.09519	0.0361545	0.790429		ESRP1	45.3294	-5.8577	2.7824	-2.10527	0.0352681	0.790429
FKBP1B	428.85	3.24036	1.58968	2.03838	0.0415122	0.790429		CEP350	45.3241	-5.85681	2.86334	-2.04545	0.0408107	0.790429
UBAC2	73.8921	3.22416	1.41805	2.27366	0.0229866	0.790429		CDCP1	45.254	-5.85562	2.53187	-2.31276	0.0207359	0.790429
FSD2	49.0349	3.22381	1.33413	2.4164	0.0156747	0.790429		LOC105378519	45.537	-5.85558	2.43622	-2.40355	0.0162366	0.790429
HSD17B1-AS1	24.4205	3.21099	1.45483	2.20712	0.0273057	0.790429		PXN-AS1	497.727	-5.85447	1.57121	-3.7261	0.000194463	0.294637
PCNX3	111.999	3.20326	1.42664	2.24532	0.0247479	0.790429		MPP7	45.1684	-5.85348	2.5739	-2.27417	0.022956	0.790429
DCXR	30.2744	3.19591	1.39242	2.29521	0.0217208	0.790429		BOD1L1	45.1003	-5.85122	2.69129	-2.17413	0.0296951	0.790429
C1orf122	150.073	3.19382	1.44884	2.20439	0.0274966	0.790429		SLK	45.0751	-5.8504	2.69051	-2.17445	0.029671	0.790429
RPLP0P6	19.2498	3.1624	1.5283	2.06923	0.0385243	0.790429		LOC112268190	44.9736	-5.84401	2.46939	-2.36658	0.0179535	0.790429
RPS20	165.304	3.12523	1.47937	2.11254	0.0346399	0.790429		TNRC6B	44.706	-5.83879	2.65836	-2.19639	0.0280642	0.790429
CFAP157	627.983	3.11728	1.52565	2.04325	0.0410272	0.790429		SP1	44.6579	-5.83625	2.51922	-2.31669	0.0205205	0.790429
WDR4	19.2725	3.11632	1.51921	2.05128	0.0402397	0.790429		HELZ	44.6731	-5.83606	2.86208	-2.0391	0.0414403	0.790429
DYNLT1	23.0377	3.112	1.47189	2.11429	0.0344903	0.790429		LRRFIP1	44.5128	-5.83264	2.59126	-2.25089	0.0243923	0.790429
EEF1B2P3	15.2684	3.11186	1.5829	1.96593	0.0493072	0.790429		BMP4	44.4667	-5.83021	2.78145	-2.09611	0.0360729	0.790429
MIR3918	146.57	3.10677	1.40167	2.21647	0.026659	0.790429		MASP2	44.4459	-5.8301	2.55839	-2.27882	0.0226781	0.790429
NDUFA4L2	15.5562	3.1059	1.57742	1.96897	0.0489564	0.790429		MIR3911	44.8387	-5.82324	2.47931	-2.34873	0.0188376	0.790429
DOC2A	412.359	3.07523	1.55763	1.97429	0.0483483	0.790429		ITGA2	44.1632	-5.82083	2.54445	-2.28765	0.0221578	0.790429
METTL23	67.3335	3.07318	1.51838	2.02399	0.0429714	0.790429		GMPR2	44.5431	-5.82058	2.4385	-2.38695	0.0169886	0.790429
ZNF165	23.3307	3.06456	1.46394	2.09336	0.0363167	0.790429		SLC5A4	44.1283	-5.81914	2.5189	-2.31019	0.0208775	0.790429
SPOUT1	527.466	3.06407	1.45625	2.10409	0.0353706	0.790429		MYO15B	44.1173	-5.81709	2.48302	-2.34275	0.0191424	0.790429
CHCHD2	67.9021	3.05925	1.2834	2.38371	0.0171393	0.790429		RNF169	44.4244	-5.8153	2.44307	-2.38033	0.0172973	0.790429
DNAJC17	88.0696	3.04079	1.5126	2.0103	0.044399	0.790429		RNF32	44.3336	-5.81363	2.43914	-2.38348	0.01715	0.790429
GBX2	105.673	3.02733	1.32391	2.28665	0.022216	0.790429		ANGPT2	43.903	-5.81292	2.63261	-2.20804	0.0272412	0.790429
RPS15A	35.216	3.01772	1.36044	2.21819	0.0265418	0.790429		COPA	43.6719	-5.80497	2.55504	-2.27197	0.0230882	0.790429
RPL37A	128.815	2.94999	1.24788	2.364	0.0180788	0.790429		PRSS23	43.6611	-5.80375	2.51755	-2.30532	0.0211486	0.790429
LOC100129034	2779.74	2.94214	1.38828	2.11927	0.0340676	0.790429		PPL	43.4421	-5.79621	2.50603	-2.31291	0.0207277	0.790429
PFDN5	93.9619	2.88188	1.39078	2.07214	0.0382526	0.790429		ALDH18A1	43.3394	-5.7935	2.52774	-2.29196	0.0219077	0.790429
TXN2	26.5357	2.82534	1.42592	1.98142	0.0475444	0.790429		LOC100128079	43.2779	-5.79196	2.55407	-2.26774	0.0233452	0.790429
CARS2	50.6983	2.81556	1.32623	2.12298	0.0337555	0.790429		TRIM33	43.0546	-5.78444	2.72962	-2.11913	0.0340791	0.790429
TFPI	28.815	2.77219	1.40276	1.97625	0.048127	0.790429		CDHR2	43.4178	-5.7803	2.45155	-2.35782	0.0183827	0.790429
LIN9	32.8596	2.77005	1.36935	2.0229	0.0430837	0.790429		LOC112268195	43.2648	-5.77925	2.4388	-2.36971	0.017802	0.790429
TOPORS	74.2185	2.73549	1.32215	2.06896	0.0385494	0.790429		CTR9	42.8979	-5.77878	2.52683	-2.28697	0.0221978	0.790429
LOC107985017	273.828	2.7278	1.30623	2.0883	0.0367704	0.790429		CUL1	43.5409	-5.77814	2.51371	-2.29866	0.0215245	0.790429
RPS21	71.0915	2.68955	1.27579	2.10815	0.0350181	0.790429		CHERP	43.3054	-5.77655	2.45294	-2.35495	0.0185253	0.790429
APOBEC3B-AS1	123.807	2.68151	1.31126	2.04499	0.040856	0.790429		POLE	42.6705	-5.77161	2.72436	-2.11852	0.0341309	0.790429
MIR302CHG	337.876	2.67451	1.35297	1.97678	0.0480668	0.790429		CPD	42.5724	-5.76871	2.58522	-2.23142	0.0256535	0.790429
PPP1R14B	56.6258	2.66549	1.30582	2.04123	0.041228	0.790429		ITGB1	233.868	-5.76639	2.13083	-2.70617	0.00680649	0.790429
PXN	217.616	2.60257	1.29032	2.017	0.0436958	0.790429		ZNF233	42.3954	-5.76134	2.51692	-2.28905	0.0220767	0.790429
MZT2B	53.404	2.58516	1.30585	1.97968	0.0477398	0.790429		RBM6	42.2556	-5.75746	2.72742	-2.11095	0.0347762	0.790429
PPP2R5D	252.584	2.54989	1.2628	2.01924	0.0434628	0.790429		LOC100507346	42.2172	-5.7567	2.65365	-2.16935	0.0300562	0.790429
LONP1	245.483	2.44357	1.20825	2.0224	0.0431349	0.790429		NCOR2	42.1791	-5.75551	2.63002	-2.18839	0.0286411	0.790429
								MEF2C-AS2	42.0901	-5.75194	2.72369	-2.11182	0.0347023	0.790429
								PTPRG-AS1	41.9986	-5.74795	2.51536	-2.28514	0.0223044	0.790429
								LOC101928059	42.4885	-5.74783	2.45947	-2.33702	0.0194382	0.790429
								SLC16A8	41.9389	-5.7455	2.5033	-2.29517	0.0217236	0.790429
								CEP95	41.8547	-5.74208	2.49424	-2.30214	0.0213275	0.790429
								SHTN1	41.6405	-5.73711	2.62559	-2.18507	0.0288835	0.790429
								MIB1	41.5853	-5.735	2.68297	-2.13756	0.0325524	0.790429
								LOC102724262	42.0564	-5.73476	2.45045	-2.34029	0.0192688	0.790429
								LYPD1	42.3098	-5.73364	2.58864	-2.21493	0.026765	0.790429
								PRPF6	41.7312	-5.73152	2.44323	-2.34588	0.0189823	0.790429
								LOC101928909	41.872	-5.72835	2.45272	-2.33551	0.019517	0.790429
								CYP2F2P	41.4552	-5.72826	2.49313	-2.29762	0.0215833	0.790429
								COL6A2	41.4377	-5.72769	2.49271	-2.29777	0.0215747	0.790429
								EP300	41.3744	-5.72695	2.77401	-2.0645	0.03897	0.790429
								TCOF1	41.3095	-5.72514	2.5499	-2.24524	0.024753	0.790429
								NKTR	41.2354	-5.7231	2.62546	-2.17985	0.0292686	0.790429
								HK1	41.2456	-5.7219	2.5117	-2.2781	0.0227206	0.790429
								MCM6	41.1463	-5.71997	2.60217	-2.19816	0.0279378	0.790429
								ALOX12B	41.4473	-5.71928	2.43974	-2.34422	0.0190671	0.790429
								UGGT1	41.0898	-5.71719	2.53616	-2.25427	0.0241789	0.790429
								PTBP1	41.0651	-5.71592	2.52295	-2.26557	0.0234778	0.790429
								CYP2A6	40.9718	-5.71382	2.60136	-2.19647	0.0280582	0.790429
								NFE2L3	40.9232	-5.71216	2.62403	-2.17687	0.0294906	0.790429
								NCBP1	40.9033	-5.71119	2.5648	-2.22676	0.0259632	0.790429
								PRKAR1B	41.3446	-5.71106	2.44719	-2.33372	0.0196105	0.790429
								ATP11A	40.8527	-5.70949	2.58234	-2.21098	0.0270375	0.790429
								FRMD4A	41.2569	-5.7073	2.45339	-2.32629	0.0200029	0.790429
								SRP68	41.0337	-5.70614	2.44227	-2.33641	0.01947	0.790429
								SLC38A4	40.7552	-5.70585	2.7202	-2.09759	0.0359416	0.790429
								PKD1P6	41.5048	-5.70529	2.61494	-2.18181	0.0291239	0.790429
								ADAM10	40.6948	-5.70361	2.54831	-2.23819	0.0252087	0.790429
								DCBLD2	223.637	-5.70157	2.10533	-2.70817	0.00676563	0.790429
								EFCAB13	40.5545	-5.69598	2.48446	-2.29264	0.0218687	0.790429
								SENP6	40.3483	-5.691	2.77176	-2.05321	0.0400524	0.790429
								ARHGEF10	40.1346	-5.68414	2.6793	-2.1215	0.0338795	0.790429
								PPIL2	40.9104	-5.68356	2.64124	-2.15186	0.0314086	0.790429
								GSR	40.1242	-5.68171	2.49934	-2.27329	0.0230089	0.790429
								PLOD1	39.9663	-5.67764	2.54626	-2.22979	0.0257612	0.790429
								NGFR-AS1	40.3828	-5.67639	2.45536	-2.31184	0.0207864	0.790429
								LOC105447645	40.1791	-5.67133	2.44434	-2.32019	0.0203306	0.790429
								ZNF227	39.689	-5.66601	2.49839	-2.26787	0.0233373	0.790429
								MYO1B	39.553	-5.66337	2.59797	-2.17992	0.0292633	0.790429
								SLC2A1	39.5135	-5.66108	2.77033	-2.04347	0.0410062	0.790429
								ITGB7	39.4748	-5.66051	2.59734	-2.17935	0.0293055	0.790429
								CDC42BPA	39.45	-5.65954	2.67894	-2.11261	0.0346344	0.790429
								GPR68	39.5106	-5.65333	2.44715	-2.31017	0.0208789	0.790429
								UBE3C	39.1511	-5.64873	2.61976	-2.1562	0.0310682	0.790429
								AKAP1	38.9667	-5.642	2.61881	-2.15441	0.0312077	0.790429
								AHCTF1	38.966	-5.64193	2.61952	-2.1538	0.0312556	0.790429
								GTPBP4	38.9982	-5.63951	2.4802	-2.27381	0.0229772	0.790429
								ST7-AS2	38.893	-5.63819	2.52999	-2.22854	0.0258446	0.790429
								NAT10	38.7254	-5.63193	2.53008	-2.22599	0.026015	0.790429
								LRP5	38.6415	-5.62955	2.55883	-2.20005	0.0278034	0.790429
								EHBP1L1	38.6153	-5.62872	2.57671	-2.18446	0.0289284	0.790429
								TBC1D9B	38.5933	-5.62774	2.55838	-2.19973	0.027826	0.790429
								LOC105372064	39.2663	-5.627	2.53363	-2.22092	0.0263562	0.790429
								SLC3A2	38.6129	-5.62678	2.50808	-2.24346	0.024867	0.790429
								TNRC6A	38.536	-5.62571	2.71569	-2.07156	0.0383069	0.790429
								CALU	38.556	-5.62297	2.47997	-2.26735	0.0233688	0.790429
								FLII	38.3841	-5.61955	2.5437	-2.2092	0.0271609	0.790429
								USO1	38.28	-5.61651	2.61749	-2.14576	0.0318924	0.790429
								SBNO1	38.2911	-5.6161	2.7689	-2.02828	0.0425319	0.790429
								ICE1	38.2545	-5.61519	2.71439	-2.06867	0.0385767	0.790429
								OPA1-AS1	38.3909	-5.61457	2.46293	-2.27963	0.0226297	0.790429
								ZNF292	38.2248	-5.61362	2.76765	-2.0283	0.0425299	0.790429
								ACAT1	38.1696	-5.61217	2.57525	-2.17927	0.0293115	0.790429
								LOC101929291	38.9381	-5.61193	2.61755	-2.14396	0.0320359	0.790429
								WDR24	38.2099	-5.61062	2.48674	-2.25621	0.0240573	0.790429
								TRIP10	38.0872	-5.60845	2.76706	-2.02686	0.0426763	0.790429
								NIN	38.0648	-5.60762	2.76941	-2.02484	0.0428834	0.790429
								YBX3	38.5114	-5.60657	2.46155	-2.27765	0.0227472	0.790429
								RFX7	37.9346	-5.60358	2.64303	-2.12013	0.0339949	0.790429
								WNT8B	37.8459	-5.59954	2.55904	-2.18814	0.0286597	0.790429
								ITCH	37.7694	-5.59704	2.57368	-2.17473	0.0296506	0.790429
								KHSRP	37.8977	-5.59592	2.46259	-2.27237	0.023064	0.790429
								PCGF3	37.8198	-5.5937	2.46948	-2.26514	0.0235042	0.790429
								EIF3A	415.499	-5.59289	1.60577	-3.48298	0.00049586	0.489974
								EFCAB14-AS1	37.6493	-5.58992	2.49613	-2.23944	0.0251276	0.790429
								OR51I2	206.946	-5.58871	2.32024	-2.40868	0.0160104	0.790429
								CARS1	37.6074	-5.58694	2.47834	-2.25431	0.0241765	0.790429
								PTPN12	37.497	-5.58681	2.67326	-2.08989	0.0366277	0.790429
								LOC107987238	37.8691	-5.58601	2.44908	-2.28086	0.0225568	0.790429
								MAPK15	37.2823	-5.57468	2.49818	-2.2315	0.0256482	0.790429
								LOC107986488	37.8808	-5.57439	2.54137	-2.19346	0.0282742	0.790429
								NCOA6	37.1756	-5.57379	2.76716	-2.01427	0.0439815	0.790429
								KLC1	37.1087	-5.57006	2.51558	-2.21422	0.0268135	0.790429
								PTPRG	37.0157	-5.56837	2.67348	-2.08281	0.0372681	0.790429
								ALG1L	37.7362	-5.56654	2.60392	-2.13776	0.0325366	0.790429
								C2	37.5657	-5.56536	2.49858	-2.22741	0.02592	0.790429
								RNF217-AS1	36.9798	-5.56462	2.5032	-2.223	0.0262156	0.790429
								SIK2	37.0018	-5.56458	2.50011	-2.22574	0.0260319	0.790429
								SUPT5H	36.8673	-5.56191	2.55713	-2.17506	0.0296256	0.790429
								FUBP3	36.831	-5.56111	2.59116	-2.14619	0.0318578	0.790429
								MAGI1	36.818	-5.56071	2.67168	-2.08136	0.0374014	0.790429
								HOXB-AS1	37.3003	-5.55653	2.50342	-2.21958	0.0264474	0.790429
								ATP2C1	36.7381	-5.55612	2.52645	-2.19918	0.0278649	0.790429
								COPB1	36.5917	-5.55189	2.67175	-2.078	0.0377094	0.790429
								AHSA1	36.5875	-5.55142	2.5707	-2.15949	0.030812	0.790429
								ROCK2	36.49	-5.54765	2.7123	-2.04537	0.0408188	0.790429
								SAP30BP	36.9827	-5.54754	2.46307	-2.25229	0.0243041	0.790429
								JAG1	36.4537	-5.54622	2.71109	-2.04576	0.0407804	0.790429
								MMP25	37.0464	-5.54542	2.49483	-2.22276	0.0262317	0.790429
								GRINA	36.3986	-5.54283	2.52449	-2.19562	0.028119	0.790429
								PDIA6	36.6299	-5.54281	2.45177	-2.26073	0.0237757	0.790429
								LOC105376615	36.2777	-5.53948	2.59066	-2.13825	0.0324963	0.790429
								ACSL3	36.291	-5.53947	2.55383	-2.16908	0.0300765	0.790429
								FAM120AOS	199.906	-5.53892	2.10506	-2.63124	0.00850734	0.790429
								DUSP6	36.1953	-5.53567	2.55312	-2.1682	0.0301435	0.790429
								NIBAN2	36.297	-5.53564	2.48125	-2.23099	0.025682	0.790429
								NSD3	36.1289	-5.53358	2.59139	-2.13537	0.0327309	0.790429
								LOC107984190	36.2733	-5.53307	2.46451	-2.2451	0.0247617	0.790429
								ATXN2	36.1097	-5.53297	2.61227	-2.11807	0.0341692	0.790429
								ZNF644	35.9721	-5.5275	2.61137	-2.1167	0.0342851	0.790429
								SCMH1	36.0312	-5.52714	2.50158	-2.20946	0.0271424	0.790429
								MINK1	35.9935	-5.52676	2.52344	-2.19017	0.0285121	0.790429
								LOC105378649	36.4128	-5.52633	2.46301	-2.24373	0.0248497	0.790429
								ATIC	35.9564	-5.52616	2.5522	-2.16526	0.0303681	0.790429
								CDC25B	36.317	-5.52432	2.45218	-2.25283	0.0242702	0.790429
								MIR4253	36.1392	-5.52401	2.45079	-2.25397	0.0241981	0.790429
								BCAR3-AS1	36.3813	-5.52162	2.47551	-2.2305	0.0257145	0.790429
								ZNF207	35.822	-5.52146	2.61098	-2.11471	0.0344546	0.790429
								PCNX1	35.8016	-5.51989	2.76194	-1.99855	0.0456567	0.790429
								MED16	36.4907	-5.51918	2.5592	-2.1566	0.0310368	0.790429
								PRKACB	35.685	-5.51599	2.61039	-2.11309	0.0345931	0.790429
								NCAPD2	35.6868	-5.51594	2.58868	-2.13079	0.0331061	0.790429
								NUP205	35.677	-5.51539	2.70834	-2.03645	0.0417056	0.790429
								IFT74	35.7878	-5.51514	2.47552	-2.22787	0.025889	0.790429
								RBM33	35.655	-5.51478	2.61044	-2.11259	0.0346362	0.790429
								LOC101928076	35.6906	-5.51406	2.51228	-2.19484	0.028175	0.790429
								TMED2	36.1655	-5.51281	2.48009	-2.22283	0.0262272	0.790429
								RAB3GAP1	35.6044	-5.51203	2.55132	-2.16046	0.0307367	0.790429
								ECPAS	35.5209	-5.509	2.57001	-2.14357	0.032067	0.790429
								SDR39U1	196.691	-5.50834	2.16303	-2.54659	0.0108781	0.790429
								EVPL	35.5611	-5.50815	2.50627	-2.19775	0.0279672	0.790429
								TMEM14EP	35.4622	-5.50628	2.7616	-1.99387	0.046166	0.790429
								ABHD12B	35.3536	-5.50188	2.55054	-2.15715	0.0309943	0.790429
								PTPN11	35.3617	-5.5007	2.51012	-2.19141	0.0284221	0.790429
								IRF7	35.3044	-5.49974	2.76407	-1.98972	0.0466215	0.790429
								POLR1A	35.2771	-5.49879	2.76104	-1.99156	0.0464191	0.790429
								COL17A1	35.224	-5.49733	2.66803	-2.06044	0.0393561	0.790429
								CTBP1	35.7289	-5.49651	2.46996	-2.22535	0.0260579	0.790429
								DMXL2	35.0291	-5.48944	2.6696	-2.05628	0.0397556	0.790429
								C9orf50	35.0543	-5.48905	2.53762	-2.16307	0.0305355	0.790429
								RFC1	34.9883	-5.4876	2.58631	-2.12179	0.0338555	0.790429
								TOPBP1	34.9913	-5.48716	2.7615	-1.98702	0.0469203	0.790429
								KCNJ13	34.9792	-5.48714	2.70674	-2.02721	0.0426405	0.790429
								NLRC3	35.054	-5.48415	2.47043	-2.21992	0.0264244	0.790429
								LOC102724050	35.3395	-5.48125	2.47304	-2.2164	0.0266639	0.790429
								VPS35	34.7972	-5.47994	2.60936	-2.10011	0.0357194	0.790429
								ABCF1	34.8829	-5.47521	2.45977	-2.2259	0.0260208	0.790429
								HYOU1	34.6146	-5.4705	2.52048	-2.17042	0.0299753	0.790429
								SPDYE2	34.5933	-5.46903	2.51226	-2.17693	0.0294855	0.790429
								CEP170	34.5272	-5.46885	2.6341	-2.07617	0.0378782	0.790429
								IPO9	34.5161	-5.46808	2.5851	-2.11523	0.0344103	0.790429
								KDM4A	34.508	-5.46665	2.53582	-2.15577	0.0311013	0.790429
								DENND4A	35.1831	-5.46626	2.55926	-2.13587	0.0326896	0.790429
								RREB1	34.4717	-5.46576	2.75925	-1.98089	0.0476037	0.790429
								COCH	34.3645	-5.46178	2.70515	-2.01903	0.0434844	0.790429
								PSAT1	34.6835	-5.46162	2.45224	-2.2272	0.0259341	0.790429
								DDX23	34.3698	-5.46087	2.53306	-2.15584	0.0310962	0.790429
								ZFHX4	34.3019	-5.45941	2.60811	-2.09325	0.036327	0.790429
								WDR3	34.3272	-5.45902	2.53355	-2.15469	0.0311858	0.790429
								EGFR-AS1	34.3426	-5.45706	2.48856	-2.19286	0.0283171	0.790429
								FAT1	945.286	-5.45556	1.86901	-2.91895	0.00351213	0.790429
								VPS13C	34.1483	-5.45223	2.75833	-1.97664	0.0480818	0.790429
								PHRF1	34.1351	-5.45187	2.56463	-2.12579	0.0335205	0.790429
								ZFP36L1	34.1819	-5.45031	2.48838	-2.1903	0.0285023	0.790429
								TCERG1	34.0362	-5.44819	2.6352	-2.06747	0.03869	0.790429
								CAND1	34.0016	-5.44684	2.66472	-2.04406	0.0409476	0.790429
								DNAH10	34.0198	-5.44495	2.50847	-2.17062	0.0299596	0.790429
								QRICH1	33.9307	-5.44391	2.63268	-2.06782	0.0386568	0.790429
								LOC105371824	34.7141	-5.44358	2.71873	-2.00225	0.0452577	0.790429
								ATP2B1	33.9527	-5.44333	2.5332	-2.1488	0.0316505	0.790429
								STK39	34.1016	-5.44328	2.46349	-2.20958	0.0271343	0.790429
								PTK7	33.9311	-5.43966	2.4876	-2.18671	0.0287636	0.790429
								ITGA7	34.2463	-5.43877	2.45846	-2.21227	0.0269483	0.790429
								NOL11	33.7969	-5.43747	2.75734	-1.972	0.0486096	0.790429
								TGOLN2	33.7575	-5.43657	2.63206	-2.06552	0.0388741	0.790429
								USP24	33.899	-5.43461	2.46443	-2.20522	0.0274386	0.790429
								SLFNL1-AS1	34.2194	-5.43264	2.47986	-2.19071	0.028473	0.790429
								TBL1XR1	33.6758	-5.43194	2.54756	-2.13221	0.0329894	0.790429
								CDH1	33.5951	-5.4296	2.66355	-2.03848	0.0415017	0.790429
								RAPH1	33.6559	-5.42943	2.5079	-2.16493	0.0303929	0.790429
								TIAM1	33.6052	-5.42903	2.54617	-2.13223	0.032988	0.790429
								CLINT1	33.4616	-5.42384	2.6099	-2.07818	0.0376924	0.790429
								PPFIA1	33.4477	-5.42326	2.60461	-2.08218	0.0373262	0.790429
								LOC105371755	34.1578	-5.41974	2.71126	-1.99897	0.0456111	0.790429
								EPPK1	33.3394	-5.41871	2.66319	-2.03466	0.0418846	0.790429
								NUSAP1	33.2437	-5.41459	2.66271	-2.03349	0.0420032	0.790429
								MLEC	33.6242	-5.41272	2.4577	-2.20235	0.0276406	0.790429
								NSUN2	33.192	-5.4123	2.605	-2.07766	0.0377408	0.790429
								TSPYL1	33.2399	-5.40899	2.47919	-2.18176	0.0291273	0.790429
								FANCD2OS	33.2708	-5.39938	2.45458	-2.19972	0.0278268	0.790429
								SPEN	363.296	-5.39819	2.1101	-2.55826	0.0105196	0.790429
								GNL2	32.9424	-5.39596	2.48135	-2.17461	0.0296595	0.790429
								SLC16A4	32.7855	-5.39463	2.6029	-2.07254	0.0382148	0.790429
								TSC22D1-AS1	32.7792	-5.39433	2.60294	-2.0724	0.038228	0.790429
								VIRMA	32.7617	-5.39369	2.66464	-2.02417	0.0429524	0.790429
								L3MBTL3	32.7202	-5.39149	2.58049	-2.08932	0.0366786	0.790429
								TACC3	32.7289	-5.39051	2.52929	-2.13123	0.0330701	0.790429
								ADGRA3	32.6675	-5.38882	2.56079	-2.10436	0.0353469	0.790429
								NOL8	32.5463	-5.38023	2.49467	-2.15669	0.0310297	0.790429
								LOC101927401	33.0988	-5.37655	2.61143	-2.05885	0.0395087	0.790429
								HBS1L	32.3951	-5.37576	2.52884	-2.12578	0.0335218	0.790429
								DCAF7	32.654	-5.37411	2.45743	-2.18688	0.028751	0.790429
								SMAD4	32.2973	-5.37244	2.56006	-2.09856	0.035856	0.790429
								LOC107984298	32.4241	-5.36845	2.46264	-2.17995	0.0292609	0.790429
								LOC101927793	32.8406	-5.36593	2.56597	-2.09119	0.0365113	0.790429
								MYO5B	32.0028	-5.36015	2.62741	-2.04009	0.0413415	0.790429
								RBM5	31.8344	-5.35242	2.69885	-1.98322	0.0473424	0.790429
								BAIAP2L1	31.9012	-5.35215	2.50351	-2.13786	0.0325285	0.790429
								CUL3	31.8614	-5.34855	2.48636	-2.15115	0.0314642	0.790429
								PYCR1	31.7559	-5.34703	2.52711	-2.11587	0.0343559	0.790429
								NARS1	31.8076	-5.3461	2.48597	-2.15051	0.0315153	0.790429
								LOC100506551	31.8642	-5.34434	2.46389	-2.16906	0.0300778	0.790429
								FUT2	32.0292	-5.3421	2.47102	-2.1619	0.030626	0.790429
								LGALS3BP	31.6201	-5.34018	2.51421	-2.124	0.0336705	0.790429
								GNPTAB	31.5959	-5.33981	2.52824	-2.11207	0.0346804	0.790429
								INCENP	31.5201	-5.33844	2.62623	-2.03274	0.0420791	0.790429
								CPSF6	31.4412	-5.33467	2.6982	-1.97712	0.0480282	0.790429
								MYO1C	31.4556	-5.33448	2.55878	-2.08478	0.0370897	0.790429
								TSC1	31.4171	-5.33371	2.65812	-2.00657	0.044795	0.790429
								BRCA1	31.2679	-5.32677	2.69758	-1.97465	0.0483083	0.790429
								CRELD1	31.8316	-5.3264	2.49601	-2.13397	0.0328456	0.790429
								TRA2B	31.2149	-5.32445	2.62559	-2.02791	0.0425699	0.790429
								MSN	31.3596	-5.32438	2.4779	-2.14875	0.0316545	0.790429
								SLMAP	31.1908	-5.3234	2.65728	-2.00332	0.0451425	0.790429
								OPN1SW	31.7484	-5.32249	2.49422	-2.13393	0.0328485	0.790429
								TUBA3D	31.1677	-5.32237	2.65803	-2.00237	0.0452446	0.790429
								ATP13A3	31.1824	-5.32207	2.5576	-2.08088	0.0374447	0.790429
								HELLS	31.1587	-5.32098	2.5578	-2.08029	0.0374987	0.790429
								YTHDC1	31.1213	-5.31967	2.57623	-2.06491	0.0389319	0.790429
								DKK1	31.3407	-5.31632	2.457	-2.16374	0.030484	0.790429
								STAU1	31.0245	-5.31579	2.65768	-2.00016	0.0454828	0.790429
								CACNB2	31.3474	-5.31534	2.45694	-2.1634	0.0305104	0.790429
								CDK5RAP3	30.9777	-5.3134	2.59826	-2.04498	0.0408564	0.790429
								ATP2B4	30.9641	-5.31289	2.62523	-2.02378	0.0429929	0.790429
								EIF4H	30.9666	-5.31202	2.55691	-2.07752	0.0377536	0.790429
								RRP1B	30.9163	-5.31076	2.65658	-1.9991	0.0455976	0.790429
								HDGFL2	31.185	-5.30894	2.45889	-2.15908	0.0308443	0.790429
								SEPTIN10	31.0697	-5.30866	2.467	-2.15187	0.0314077	0.790429
								CNN3	30.8041	-5.30539	2.70079	-1.96439	0.0494853	0.790429
								SEC23IP	30.7288	-5.30037	2.53954	-2.08714	0.0368757	0.790429
								PPRC1	30.6651	-5.29894	2.69586	-1.96558	0.049347	0.790429
								LOC105369149	30.7075	-5.29702	2.50109	-2.11788	0.0341851	0.790429
								ITM2B	30.5402	-5.29006	2.51222	-2.10573	0.0352279	0.790429
								ZNF609	30.4179	-5.28692	2.57484	-2.0533	0.0400431	0.790429
								SCRIB	30.5192	-5.28499	2.47686	-2.13375	0.0328632	0.790429
								NUP155	30.333	-5.28325	2.59648	-2.03477	0.0418738	0.790429
								SCAF1	30.4589	-5.28072	2.47467	-2.13391	0.0328498	0.790429
								LCAT	30.237	-5.27895	2.62263	-2.01284	0.0441309	0.790429
								ZBED4	30.2283	-5.27832	2.66006	-1.98428	0.0472243	0.790429
								PINK1	167.478	-5.27772	1.88748	-2.79618	0.00517107	0.790429
								ASXL2	30.2093	-5.2774	2.60028	-2.02956	0.0424018	0.790429
								EZH2	30.2531	-5.27638	2.5113	-2.10105	0.0356365	0.790429
								HTATSF1	30.1426	-5.27449	2.62475	-2.00952	0.0444817	0.790429
								UBP1	30.2622	-5.27265	2.47622	-2.12931	0.0332284	0.790429
								ZC3H18	30.0889	-5.27127	2.5737	-2.04813	0.0405474	0.790429
								CD37	166.18	-5.27079	2.05269	-2.56775	0.0102361	0.790429
								CTCF	29.9674	-5.26601	2.62359	-2.00718	0.044731	0.790429
								CKMT2	29.932	-5.26451	2.65405	-1.98358	0.0473032	0.790429
								LOC105370902	30.2343	-5.25812	2.4677	-2.13077	0.0331078	0.790429
								TAX1BP1	29.7815	-5.25539	2.53973	-2.06927	0.0385203	0.790429
								MYO5C	29.7351	-5.25455	2.59797	-2.02256	0.0431187	0.790429
								TP53	29.906	-5.25289	2.46679	-2.12944	0.0332176	0.790429
								CDK11B	29.6967	-5.25196	2.55392	-2.05643	0.0397409	0.790429
								SORL1	29.6775	-5.25155	2.57247	-2.04145	0.0412065	0.790429
								FAM120B	29.5954	-5.24706	2.55404	-2.05442	0.0399355	0.790429
								SATB2	30.2872	-5.24651	2.59339	-2.02303	0.0430703	0.790429
								ERVFRD-1	29.5569	-5.2465	2.65452	-1.97643	0.0481055	0.790429
								PITRM1	29.5706	-5.2464	2.57263	-2.03931	0.0414188	0.790429
								AMT	29.5273	-5.24498	2.62104	-2.00111	0.0453808	0.790429
								KDM5B	29.5098	-5.24414	2.62189	-2.00013	0.0454859	0.790429
								TNIK	29.5046	-5.24362	2.59556	-2.02023	0.04336	0.790429
								B4GALT5	29.5371	-5.24353	2.54003	-2.06435	0.0389843	0.790429
								CLCN3	29.4487	-5.24123	2.65274	-1.97578	0.0481794	0.790429
								DHX40	29.4501	-5.24095	2.59417	-2.02028	0.0433542	0.790429
								NANS	30.0234	-5.24054	2.5032	-2.09354	0.0363011	0.790429
								HMGCR	29.4756	-5.24046	2.53694	-2.06566	0.0388608	0.790429
								ANKRD13A	30.0944	-5.23817	2.57155	-2.03697	0.0416529	0.790429
								YTHDF2	29.3911	-5.23764	2.57173	-2.03662	0.041688	0.790429
								TEX10	29.3432	-5.23576	2.5945	-2.01802	0.043589	0.790429
								LOC105376106	29.8984	-5.23436	2.50422	-2.09021	0.0365987	0.790429
								PDE4B	29.3065	-5.23424	2.62051	-1.99741	0.0457805	0.790429
								LOC105375169	29.8128	-5.2335	2.48419	-2.10673	0.0351413	0.790429
								LOC283335	29.4442	-5.23269	2.47722	-2.11233	0.0346584	0.790429
								DNAJC9-AS1	29.8188	-5.23257	2.4918	-2.09992	0.0357363	0.790429
								DLG5	29.2419	-5.23081	2.5946	-2.01604	0.0437958	0.790429
								GRSF1	29.2248	-5.22953	2.57251	-2.03286	0.0420671	0.790429
								UNC45A	29.2731	-5.22158	2.4671	-2.11648	0.0343039	0.790429
								PTPRA	29.0226	-5.21898	2.55275	-2.04445	0.0409087	0.790429
								NSD1	160.393	-5.2186	2.39812	-2.17612	0.0295463	0.790429
								SGSM2	29.0164	-5.2169	2.52412	-2.06682	0.0387512	0.790429
								HSD17B4	28.994	-5.21599	2.52151	-2.0686	0.0385834	0.790429
								NOMO1	28.9982	-5.21593	2.52567	-2.06516	0.0389076	0.790429
								ATAD5	28.9814	-5.21532	2.5212	-2.06859	0.038585	0.790429
								CLK3	28.8008	-5.20857	2.57058	-2.02622	0.0427424	0.790429
								AVL9	28.9934	-5.20609	2.46481	-2.11217	0.0346722	0.790429
								RBM26	28.6862	-5.20363	2.61941	-1.98657	0.04697	0.790429
								LOC105378586	29.2635	-5.19892	2.55336	-2.03611	0.0417391	0.790429
								TM9SF2	28.6919	-5.19766	2.48938	-2.08794	0.0368034	0.790429
								IP6K2	28.5165	-5.19293	2.53683	-2.04702	0.0406564	0.790429
								WNT16	28.4781	-5.19237	2.56942	-2.02083	0.043297	0.790429
								LOC100101148	28.9341	-5.19159	2.47935	-2.09394	0.0362658	0.790429
								USP5	28.4453	-5.19128	2.62242	-1.97958	0.0477508	0.790429
								TERF2	28.496	-5.18645	2.48273	-2.08901	0.0367066	0.790429
								MSI2	28.3489	-5.18445	2.53437	-2.04565	0.0407906	0.790429
								MAN1A2	28.2916	-5.18376	2.61752	-1.98041	0.0476573	0.790429
								ARCN1	28.2877	-5.18326	2.59418	-1.99804	0.0457128	0.790429
								USP10	28.2948	-5.18249	2.55136	-2.03127	0.0422279	0.790429
								FOXK2	28.2888	-5.18137	2.53371	-2.04497	0.0408576	0.790429
								RAB11B	28.8174	-5.18067	2.50804	-2.06563	0.0388636	0.790429
								LOC107984219	156.377	-5.18006	1.88893	-2.74232	0.00610067	0.790429
								HNRNPA0	28.2298	-5.17914	2.55463	-2.02735	0.0426262	0.790429
								TPGS2	28.7885	-5.1781	2.51681	-2.05741	0.0396472	0.790429
								RPE	28.3231	-5.17619	2.47578	-2.09073	0.0365525	0.790429
								NCL	311.718	-5.17565	1.65734	-3.12286	0.00179102	0.790429
								SYNE2	155.593	-5.17433	2.44397	-2.11718	0.0342442	0.790429
								RAC1	28.7948	-5.17219	2.61064	-1.98119	0.0475696	0.790429
								CSNK1G2	28.0992	-5.17079	2.52034	-2.05162	0.0402067	0.790429
								TTC1	28.168	-5.16818	2.47581	-2.08748	0.0368452	0.790429
								CPNE7	28.007	-5.16768	2.55016	-2.02641	0.0427224	0.790429
								DLAT	28.0168	-5.16433	2.49698	-2.06823	0.0386187	0.790429
								COL6A1	27.7803	-5.15679	2.56773	-2.0083	0.044611	0.790429
								ZFYVE9	28.1143	-5.15321	2.47148	-2.08507	0.0370627	0.790429
								CLIC4	27.7077	-5.15289	2.56905	-2.00576	0.0448824	0.790429
								PAFAH1B2	27.8635	-5.15229	2.47591	-2.08096	0.0374372	0.790429
								PRKDC	306.668	-5.15209	1.94997	-2.64214	0.00823848	0.790429
								PLS3	27.6532	-5.1511	2.61584	-1.9692	0.0489307	0.790429
								ANKRD61	27.642	-5.14948	2.569	-2.00447	0.04502	0.790429
								ZYX	28.2464	-5.14795	2.54785	-2.02051	0.0433306	0.790429
								SZT2-AS1	28.149	-5.14576	2.51679	-2.04457	0.0408969	0.790429
								CS	27.7507	-5.14485	2.47204	-2.08121	0.0374143	0.790429
								SSR1	28.0033	-5.1446	2.4855	-2.06985	0.0384668	0.790429
								OSBP	27.6298	-5.14418	2.50017	-2.05753	0.0396355	0.790429
								UBE2I	27.4038	-5.13714	2.56707	-2.00117	0.0453745	0.790429
								TRA2A	27.3947	-5.13514	2.5343	-2.02625	0.0427387	0.790429
								USP36	27.3585	-5.13087	2.50949	-2.04459	0.0408957	0.790429
								NIPBL	150.766	-5.12869	2.39143	-2.14461	0.0319838	0.790429
								TLCD3A	27.7176	-5.12643	2.49576	-2.05406	0.0399702	0.790429
								RNF20	27.196	-5.1255	2.54745	-2.01201	0.0442189	0.790429
								TRPM7	27.159	-5.12491	2.58827	-1.98005	0.0476981	0.790429
								ARPC1A	27.1562	-5.12151	2.51797	-2.03398	0.0419535	0.790429
								ABTB2	27.1056	-5.12144	2.56623	-1.99571	0.045966	0.790429
								RDX	27.0776	-5.11834	2.53116	-2.02213	0.0431628	0.790429
								TMEM115	27.0965	-5.11708	2.50641	-2.0416	0.0411917	0.790429
								TMEM94	27.5647	-5.11354	2.53741	-2.01526	0.0438774	0.790429
								ADD1	26.9812	-5.11305	2.53293	-2.01863	0.0435257	0.790429
								DNAJA2	27.0515	-5.11063	2.4813	-2.05966	0.0394314	0.790429
								SYMPK	26.8921	-5.10938	2.54702	-2.00603	0.0448534	0.790429
								DIP2B	26.8481	-5.10835	2.58783	-1.97399	0.0483828	0.790429
								CLUH	26.8425	-5.1081	2.58742	-1.97421	0.0483582	0.790429
								FOXC1	26.9243	-5.10658	2.496	-2.0459	0.040766	0.790429
								CDAN1	26.7378	-5.099	2.51733	-2.02556	0.0428103	0.790429
								NMT1	26.6449	-5.09738	2.58845	-1.96928	0.0489207	0.790429
								MKRN1	26.6211	-5.09023	2.49768	-2.03798	0.0415514	0.790429
								SH3BP5	26.5279	-5.08865	2.53152	-2.01012	0.0444188	0.790429
								ELAVL1	26.4947	-5.08587	2.5207	-2.01764	0.0436285	0.790429
								TAF9B	26.9094	-5.08526	2.49839	-2.03541	0.0418093	0.790429
								LOC107984655	26.6537	-5.0841	2.47065	-2.0578	0.0396095	0.790429
								SBF1	26.8144	-5.08316	2.48405	-2.04632	0.0407247	0.790429
								SLC16A1	26.3976	-5.08268	2.54844	-1.99443	0.0461051	0.790429
								TOP1MT	26.6135	-5.08029	2.47141	-2.05562	0.0398187	0.790429
								DPH3P1	26.8392	-5.07983	2.49862	-2.03306	0.0420467	0.790429
								RAB10	26.3145	-5.07599	2.51618	-2.01733	0.0436606	0.790429
								PPP2R5C	26.2467	-5.07596	2.58733	-1.96185	0.04978	0.790429
								SH2B3	26.3565	-5.07536	2.50211	-2.02843	0.0425159	0.790429
								NCOA3	26.2275	-5.07395	2.56791	-1.97591	0.0481653	0.790429
								ARHGAP32	26.2185	-5.06912	2.51119	-2.01861	0.0435276	0.790429
								SLC12A4	26.3306	-5.06787	2.47376	-2.04865	0.0404965	0.790429
								MZF1	26.2744	-5.05603	2.47762	-2.04068	0.0412822	0.790429
								GAK	25.9387	-5.0552	2.51559	-2.00955	0.0444788	0.790429
								SEC62	26.0564	-5.05433	2.47891	-2.03893	0.0414568	0.790429
								CNOT1	143.103	-5.05365	2.06428	-2.44814	0.0143595	0.790429
								ARIH2	25.8315	-5.0478	2.50491	-2.01516	0.0438874	0.790429
								HMGA2	25.6446	-5.04099	2.54409	-1.98145	0.047541	0.790429
								TJP3	25.6782	-5.03783	2.49588	-2.01846	0.0435432	0.790429
								NLN	25.58	-5.0363	2.52828	-1.99199	0.0463722	0.790429
								CALD1	25.617	-5.03578	2.50384	-2.01122	0.044302	0.790429
								RHOBTB3	25.5562	-5.03497	2.52836	-1.9914	0.0464366	0.790429
								IVNS1ABP	25.6733	-5.03431	2.4817	-2.02857	0.0425018	0.790429
								PAXIP1	25.5122	-5.02961	2.52679	-1.99052	0.0465341	0.790429
								DDR1	25.7257	-5.02661	2.47605	-2.03009	0.0423471	0.790429
								PTPN23	25.286	-5.01918	2.53622	-1.979	0.047816	0.790429
								SARM1	140.304	-5.01508	2.15439	-2.32784	0.0199207	0.790429
								POLH	25.2462	-5.01439	2.50827	-1.99914	0.0455927	0.790429
								GDI1	25.1801	-5.01211	2.5166	-1.99162	0.046413	0.790429
								GZF1	25.5728	-5.01083	2.49693	-2.0068	0.0447712	0.790429
								LOC107985072	25.3003	-5.00556	2.47384	-2.0234	0.0430322	0.790429
								RNH1	24.9549	-4.9978	2.50316	-1.9966	0.045869	0.790429
								LOC107986298	24.9119	-4.99668	2.51499	-1.98676	0.0469495	0.790429
								FKBP9	24.453	-4.96984	2.51351	-1.97725	0.0480133	0.790429
								SSTR5	24.8889	-4.96747	2.52142	-1.9701	0.0488265	0.790429
								AVIL	24.4855	-4.96685	2.48866	-1.99579	0.0459565	0.790429
								LOC112268289	24.7178	-4.96355	2.49447	-1.98982	0.0466104	0.790429
								LOC105372117	24.4928	-4.96147	2.47808	-2.00215	0.0452689	0.790429
								ANKRD10	24.1882	-4.94714	2.48653	-1.98958	0.0466374	0.790429
								CARHSP1	24.5296	-4.94712	2.51575	-1.96646	0.049245	0.790429
								LASP1	24.2882	-4.9414	2.48882	-1.98543	0.0470961	0.790429
								RNF34	24.2508	-4.94087	2.48076	-1.99168	0.0464066	0.790429
								LRRC37A4P	24.0866	-4.93889	2.48003	-1.99146	0.0464298	0.790429
								RAB7A	23.8149	-4.9298	2.50313	-1.96946	0.0489004	0.790429
								AMIGO3	23.7555	-4.92623	2.50247	-1.96854	0.0490055	0.790429
								TFB1M	24.08	-4.9246	2.49635	-1.97272	0.0485273	0.790429
								MUTYH	23.7622	-4.92059	2.4987	-1.96926	0.0489233	0.790429
								MAP2K1	23.7137	-4.90758	2.48445	-1.97532	0.0482316	0.790429
								LOC105370910	129.161	-4.90321	1.92402	-2.54842	0.0108213	0.790429
								KITLG	128.325	-4.89372	1.92299	-2.54485	0.0109323	0.790429
								ACSL5	128.198	-4.89372	2.07452	-2.35896	0.0183263	0.790429
								LOC107984661	385.579	-4.8931	1.45337	-3.36673	0.000760657	0.616625
								SERPINF1	23.4402	-4.88833	2.49058	-1.96272	0.0496781	0.790429
								ZBTB20-AS1	127.607	-4.88599	2.4209	-2.01825	0.0435652	0.790429
								SON	125.456	-4.86226	2.06368	-2.35611	0.0184675	0.790429
								NUMA1	121.004	-4.8088	1.95309	-2.46216	0.0138105	0.790429
								DST	362.168	-4.80289	2.10106	-2.28594	0.0222578	0.790429
								LOC107984638	239.771	-4.7881	2.0791	-2.30297	0.0212808	0.790429
								IQGAP1	116.909	-4.75936	2.20645	-2.15702	0.0310042	0.790429
								MELTF-AS1	116.925	-4.74804	2.28193	-2.08072	0.03746	0.790429
								MAP4	115.563	-4.7426	2.03334	-2.33242	0.0196784	0.790429
								RAB11B-AS1	229.117	-4.72158	1.8318	-2.57757	0.00994974	0.790429
								MSH6	113.486	-4.71631	2.0993	-2.24661	0.024665	0.790429
								BPTF	113.465	-4.71583	2.20187	-2.14173	0.0322148	0.790429
								C22orf23	112.862	-4.69617	2.31483	-2.02873	0.0424859	0.790429
								ANO7	440.606	-4.66633	1.51513	-3.07983	0.00207119	0.790429
								LDLRAD2	330.367	-4.66495	2.00062	-2.33175	0.0197139	0.790429
								PIGF	108.712	-4.64182	2.04698	-2.26764	0.023351	0.790429
								SVIL-AS1	107.85	-4.63688	1.89061	-2.45259	0.0141832	0.790429
								GNAS	107.115	-4.62979	1.91342	-2.41964	0.0155357	0.790429
								HSPA9	105.363	-4.60565	1.91215	-2.40862	0.0160128	0.790429
								MDN1	104.626	-4.59765	2.20812	-2.08216	0.0373283	0.790429
								RAD21	103.005	-4.57492	2.01894	-2.26601	0.023451	0.790429
								EIF4B	207.049	-4.57406	1.67689	-2.72771	0.00637753	0.790429
								GP6	102.782	-4.5713	2.30653	-1.98189	0.0474912	0.790429
								LRPPRC	96.4755	-4.4791	1.99236	-2.24814	0.0245673	0.790429
								GOLGB1	96.0503	-4.47304	2.18041	-2.05147	0.0402217	0.790429
								RECQL4	95.839	-4.46851	1.94422	-2.29835	0.0215418	0.790429
								KIF1C-AS1	282.151	-4.43424	1.58398	-2.79943	0.00511932	0.790429
								OBSCN	93.4772	-4.43328	2.01862	-2.19619	0.0280782	0.790429
								IL20RB-AS1	92.3592	-4.4094	1.89367	-2.32849	0.019886	0.790429
								TUBGCP4	184.354	-4.40482	1.61714	-2.72383	0.00645303	0.790429
								PABPC1	456.946	-4.39561	1.44833	-3.03496	0.00240571	0.790429
								EHBP1-AS1	182.512	-4.39109	1.58924	-2.76301	0.00572711	0.790429
								FLNC-AS1	90.7494	-4.3848	1.89458	-2.31439	0.0206465	0.790429
								HSPA4	90.1331	-4.37171	1.90348	-2.29669	0.0216364	0.790429
								PDCD11	89.5889	-4.37113	2.00444	-2.18072	0.0292038	0.790429
								ZNF397	89.1043	-4.35357	1.91804	-2.2698	0.0232195	0.790429
								PLEKHG3	89.3166	-4.35262	2.05873	-2.11422	0.0344964	0.790429
								HNRNPF	87.2722	-4.33327	2.13245	-2.03206	0.0421473	0.790429
								DHX9	86.2551	-4.31616	2.07939	-2.07568	0.0379232	0.790429
								CTNNA1	85.5536	-4.30415	2.06782	-2.08149	0.0373893	0.790429
								HNRNPM	85.0322	-4.29364	1.94586	-2.20655	0.0273456	0.790429
								SNRK-AS1	85.0839	-4.2868	1.90732	-2.24755	0.0246051	0.790429
								LOC107984500	170.252	-4.28591	1.77264	-2.41781	0.0156143	0.790429
								RPE65	253.937	-4.28375	1.5127	-2.83185	0.00462798	0.790429
								PLXNB2	83.9132	-4.27477	1.9639	-2.17667	0.0295049	0.790429
								DDX46	83.7822	-4.27304	1.99527	-2.14159	0.0322267	0.790429
								PRRC2B	82.8507	-4.25718	2.15883	-1.97198	0.0486115	0.790429
								LOC105373511	83.5728	-4.25546	2.01118	-2.11591	0.0343528	0.790429
								LOC101927179	82.3374	-4.246	1.93425	-2.19516	0.0281518	0.790429
								DENND1C	328.608	-4.23649	1.48129	-2.86	0.00423641	0.790429
								CSDE1	162.851	-4.228	1.65193	-2.55943	0.0104845	0.790429
								ATP8B1	80.2823	-4.21043	1.98167	-2.12469	0.0336126	0.790429
								LGALS8	240.204	-4.19711	1.72304	-2.43588	0.0148556	0.790429
								ZC3H13	78.2325	-4.17094	1.93442	-2.15617	0.0310703	0.790429
								DENND11	78.6296	-4.17038	1.9125	-2.18059	0.0292137	0.790429
								CERNA1	78.0613	-4.16966	1.99913	-2.08574	0.0370026	0.790429
								AHSA2P	312.76	-4.16574	1.39405	-2.98823	0.00280602	0.790429
								GPI	77.4485	-4.15699	1.95648	-2.12472	0.0336097	0.790429
								LOC101928543	230.746	-4.13783	1.91581	-2.15984	0.0307854	0.790429
								DNMT1	76.0886	-4.13269	2.05017	-2.01578	0.0438228	0.790429
								WDR1	75.6052	-4.12344	2.07396	-1.9882	0.0467894	0.790429
								APP	150.107	-4.10501	1.58241	-2.59416	0.00948233	0.790429
								RNF213	221.471	-4.08371	1.77264	-2.30375	0.0212366	0.790429
								SNRNP35	73.723	-4.07013	2.01163	-2.0233	0.043042	0.790429
								MET	145.328	-4.06168	1.89703	-2.14107	0.0322682	0.790429
								LOC100288123	72.9402	-4.05945	1.91726	-2.11732	0.0342327	0.790429
								STAG3	145.276	-4.0549	1.60832	-2.5212	0.0116955	0.790429
								SND1	71.3224	-4.03728	1.9942	-2.02451	0.0429172	0.790429
								CCDC152	70.9128	-4.02488	1.91201	-2.10506	0.0352865	0.790429
								LOC107987245	70.7791	-4.01112	1.9749	-2.03105	0.0422498	0.790429
								COG1	140.642	-4.00639	1.63133	-2.4559	0.0140532	0.790429
								PLCG1-AS1	912.464	-4.00598	1.48654	-2.69485	0.00704212	0.790429
								ANP32B	70.4745	-4.00362	2.00752	-1.99431	0.0461181	0.790429
								NR1I3	69.7142	-3.99897	1.90723	-2.09674	0.0360165	0.790429
								LOC100128494	1110.59	-3.99051	1.23844	-3.22222	0.00127202	0.790429
								PSIP1	67.3325	-3.95085	1.93857	-2.03802	0.0415479	0.790429
								COX15	65.7159	-3.91396	1.92441	-2.03385	0.041967	0.790429
								AP2B1	65.6352	-3.91303	1.93775	-2.01937	0.0434492	0.790429
								DAP3	65.7823	-3.91269	1.90615	-2.05266	0.0401054	0.790429
								ITPRID2	392.558	-3.90477	1.56833	-2.48976	0.0127829	0.790429
								SEC61A1	65.1451	-3.9034	1.96194	-1.98957	0.0466386	0.790429
								PABPC4	64.8442	-3.89126	1.90837	-2.03904	0.0414458	0.790429
								CNTNAP1	64.023	-3.87749	1.95306	-1.98534	0.0471068	0.790429
								PPIE	62.8069	-3.8457	1.91307	-2.01022	0.0444075	0.790429
								EEF1A2	121.203	-3.79457	1.71212	-2.2163	0.0266708	0.790429
								LOC100129148	363.898	-3.78964	1.44327	-2.62573	0.00864622	0.790429
								SEPTIN2	121.167	-3.7883	1.59322	-2.37776	0.0174182	0.790429
								ODAD3	358.334	-3.76626	1.64861	-2.2845	0.022342	0.790429
								CCDC65	59.4953	-3.76499	1.91192	-1.96922	0.0489274	0.790429
								SLC9A3	177.941	-3.7553	1.54604	-2.42898	0.0151414	0.790429
								ILRUN-AS1	110.836	-3.662	1.65896	-2.20741	0.0272855	0.790429
								MDC1-AS1	219.566	-3.64498	1.41652	-2.57319	0.0100767	0.790429
								RSL1D1-DT	216.419	-3.61924	1.54036	-2.34961	0.0187932	0.790429
								PTPRF	107.57	-3.61885	1.77928	-2.03388	0.0419633	0.790429
								KDM4A-AS1	162.431	-3.61858	1.69841	-2.13057	0.033125	0.790429
								SPAG17	106.217	-3.58808	1.75603	-2.0433	0.0410232	0.790429
								POLR1C	104.365	-3.5688	1.58987	-2.24472	0.0247864	0.790429
								LOC107985304	208.43	-3.56708	1.40138	-2.5454	0.0109152	0.790429
								PRKAR1A	103.738	-3.5651	1.73829	-2.05092	0.0402745	0.790429
								DPP9-AS1	255.615	-3.53786	1.36444	-2.59291	0.00951677	0.790429
								TTN	810.286	-3.52501	1.75782	-2.00533	0.0449279	0.790429
								SLC26A10	151.97	-3.52336	1.47565	-2.38767	0.0169554	0.790429
								HSP90B1	151.058	-3.51446	1.47683	-2.37973	0.0173252	0.790429
								GLG1	150.467	-3.51218	1.49766	-2.34511	0.0190214	0.790429
								DSG2-AS1	149.245	-3.49992	1.4924	-2.34516	0.0190191	0.790429
								IPO9-AS1	99.1568	-3.49567	1.61803	-2.16045	0.0307376	0.790429
								LRRC37A16P	148.693	-3.48682	1.76035	-1.98075	0.047619	0.790429
								ACLY	98.214	-3.48377	1.69923	-2.05021	0.0403444	0.790429
								NUCKS1	96.4275	-3.45582	1.66012	-2.08167	0.0373731	0.790429
								PAXIP1-AS2	96.6887	-3.44988	1.66657	-2.07005	0.038448	0.790429
								HOXA-AS3	231.934	-3.39032	1.63641	-2.07181	0.0382836	0.790429
								BCAN	413.196	-3.37777	1.30509	-2.58815	0.0096493	0.790429
								EZR	274.27	-3.37227	1.33292	-2.52998	0.0114069	0.790429
								SEMA3F-AS1	227.107	-3.35939	1.52398	-2.20435	0.0274997	0.790429
								WRAP53	223.804	-3.34178	1.37526	-2.42993	0.0151019	0.790429
								HDLBP	178.21	-3.33702	1.6074	-2.07603	0.0378912	0.790429
								CANX	133.017	-3.32871	1.49069	-2.233	0.025549	0.790429
								KIF23-AS1	130.998	-3.30517	1.47722	-2.23743	0.0252582	0.790429
								LOC107985219	345.291	-3.28652	1.29469	-2.53846	0.0111341	0.790429
								LRRC37A17P	85.0422	-3.26898	1.65276	-1.97789	0.0479407	0.790429
								HSD17B1	209.31	-3.23689	1.64371	-1.96925	0.0489241	0.790429
								PKP4-AS1	82.3474	-3.21589	1.60217	-2.00721	0.0447274	0.790429
								EEF2	570.645	-3.20195	1.38312	-2.31502	0.0206119	0.790429
								MTREX	80.4601	-3.17877	1.60774	-1.97717	0.0480219	0.790429
								XRCC3	120.54	-3.17389	1.60581	-1.9765	0.0480981	0.790429
								ACADVL	118.963	-3.16439	1.61304	-1.96176	0.0497907	0.790429
								CLCC1	118.999	-3.15748	1.50007	-2.10489	0.035301	0.790429
								LOC107985481	156.633	-3.13669	1.53944	-2.03754	0.0415956	0.790429
								ODF2-AS1	113.704	-3.0907	1.47856	-2.09035	0.0365866	0.790429
								FANCA	559.082	-3.06712	1.24317	-2.46718	0.0136183	0.790429
								PDP1	217.562	-3.02827	1.48778	-2.03543	0.0418081	0.790429
								RGL4	144.86	-3.02626	1.44829	-2.08954	0.0366591	0.790429
								GTF2I-AS1	252.098	-3.01388	1.35421	-2.22557	0.0260432	0.790429
								CPOX	107.312	-3.0086	1.5153	-1.98549	0.0470904	0.790429
								PABPC4-AS1	1214.93	-3.00314	1.37228	-2.18844	0.0286377	0.790429
								IAH1	277.218	-2.95566	1.36826	-2.16016	0.0307605	0.790429
								XRCC6	169.657	-2.928	1.40449	-2.08474	0.0370931	0.790429
								ZDHHC6	948.569	-2.72165	1.213	-2.24373	0.0248499	0.790429
								PTPRB	170.449	-2.65801	1.34747	-1.9726	0.0485417	0.790429
								HNRNPA1	193.487	-2.61615	1.32028	-1.9815	0.0475351	0.790429

## Sheet: Table S6
Supplementary Table S6. DEGs in HT29 Control vs HT29 Cisplatin 30M
UpregulatedGenes	baseMean	log2FoldChange	lfcSE	stat	pvalue	padj		DownregulatedGenes	baseMean	log2FoldChange	lfcSE	stat	pvalue	padj
FBXO44	20.1556	6.84437	1.16519	5.87406	4.25248e-09	9.55321e-05		LOC105369149	78.8795	-8.28972	2.15453	-3.84758	0.000119291	0.051035
LOC105375064	5.61232	6.7362	1.77598	3.79294	0.000148875	0.0551786		LOC100128653	71.9974	-8.16131	2.22162	-3.67358	0.000239174	0.0726087
PDZD3	2.40779	6.26488	2.44305	2.56437	0.0103362	0.525346		PCED1B	67.6561	-8.07107	2.24842	-3.58966	0.000331107	0.0806
PHYHIP	2.40779	6.26488	2.44305	2.56437	0.0103362	0.525346		TSC22D1-AS1	48.1675	-7.58598	2.17363	-3.49	0.000483016	0.10492
FGF17	1.71985	5.77945	2.80188	2.0627	0.0391412	0.892697		EGFR-AS1	34.3858	-7.10079	2.21219	-3.20984	0.00132808	0.195002
LOC105370092	1.71985	5.77945	2.80188	2.0627	0.0391412	0.892697		TMSB4X	33.2229	-7.05623	2.32426	-3.03591	0.00239811	0.258577
TICAM2	1.71985	5.77945	2.80188	2.0627	0.0391412	0.892697		SBF2-AS1	32.4217	-7.01457	2.1923	-3.19965	0.00137596	0.197329
RASL10B	2.86057	5.73619	2.19959	2.60784	0.00911153	0.500466		IGSF3P1	29.9856	-6.89958	2.20913	-3.12321	0.00178892	0.229646
HERC6	2.73377	5.54355	2.26341	2.4492	0.0143172	0.597838		PRANCR	28.162	-6.81407	2.25706	-3.019	0.00253612	0.261625
TSPAN32	2.54028	5.54354	2.29575	2.4147	0.0157481	0.619753		RPS27	26.7835	-6.74943	2.32144	-2.90743	0.00364411	0.326155
GRAPL	3.72714	5.37428	1.91539	2.80584	0.00501854	0.370245		LIPJ	26.7683	-6.73446	2.17915	-3.09041	0.0019988	0.235095
HMGN2P3	2.3898	5.32115	2.37831	2.23737	0.0252625	0.762798		RBM39	25.6043	-6.67936	2.19139	-3.04799	0.00230376	0.256207
LOC105378632	2.24245	5.32115	2.40545	2.21213	0.026958	0.781435		PFN1P6	25.3435	-6.66466	2.27014	-2.93579	0.00332698	0.307574
MESP2	2.24245	5.32115	2.40545	2.21213	0.026958	0.781435		HMGA1P2	22.7506	-6.51441	2.29084	-2.84367	0.00445966	0.357234
LOC105372281	2.17263	5.32115	2.43175	2.1882	0.028655	0.800096		CNIH3	22.5628	-6.50023	2.29239	-2.83556	0.00457452	0.358605
PNCK	2.04583	5.05811	2.52333	2.00454	0.0450124	0.948597		FAM13B-AS1	22.4668	-6.49438	2.29168	-2.83389	0.00459848	0.358605
SRGAP2B	1.89848	5.05811	2.56332	1.97326	0.0484654	0.966083		CAB39	20.8656	-6.39231	2.26709	-2.8196	0.00480831	0.369094
SRGAP2C	3.0392	5.05116	2.04891	2.4653	0.0136899	0.586707		KMT2C	20.8335	-6.38654	2.25042	-2.83793	0.00454064	0.358605
VAMP5	6.8527	5.04484	1.42615	3.53737	0.000404126	0.0917039		PLPP6	19.7792	-6.30621	2.24964	-2.80321	0.00505966	0.370245
PRR29	26.1397	5.0106	0.89975	5.56889	2.5637e-08	0.000191979		LOC102724916	20.1617	-6.29126	2.23325	-2.81708	0.00484623	0.369094
LOC730668	5.92915	4.91853	1.55578	3.16145	0.00156985	0.213737		PLK2	19.1586	-6.26825	2.23624	-2.80304	0.00506237	0.370245
ERLNC1	5.70885	4.75856	1.59088	2.99115	0.00277925	0.273842		CEP170B	18.9831	-6.25792	2.25139	-2.77958	0.00544301	0.381436
MYCBPAP	2.28144	4.74892	2.40462	1.97491	0.048278	0.965437		CDV3	17.626	-6.14395	2.21037	-2.7796	0.00544252	0.381436
LOC105373977	2.76505	4.70606	2.2531	2.0887	0.0367344	0.881664		SLC34A3	17.4882	-6.13643	2.22785	-2.75442	0.00587971	0.390792
IFI6	11.4638	4.69847	1.23733	3.79728	0.000146294	0.0551786		VAPA	17.6464	-6.13359	2.20101	-2.78672	0.00532442	0.380933
TCN2	2.30513	4.69175	2.25971	2.07626	0.0378697	0.884201		LOC731755	16.5535	-6.01791	2.20736	-2.72629	0.00640507	0.40762
RASL12	15.0541	4.68233	1.02762	4.55647	5.20204e-06	0.00898953		BRCA2	16.005	-6.0091	2.34924	-2.55789	0.0105309	0.526626
TNFRSF25	15.5258	4.61237	1.05769	4.36081	1.29582e-05	0.0148638		PLXNC1	15.4822	-5.92629	2.22093	-2.66838	0.00762182	0.454688
LOC105371818	2.37495	4.57358	2.24213	2.03984	0.0413664	0.925097		APC	14.9127	-5.90633	2.3139	-2.55254	0.0106939	0.526626
PPP1R27	6.23145	4.53762	1.47049	3.08579	0.00203011	0.237534		DLEU7	14.6404	-5.88143	2.29338	-2.56452	0.0103318	0.525346
NENF	4.09212	4.475	1.82857	2.44726	0.0143947	0.598026		LOC101929770	14.7022	-5.87279	2.24479	-2.61619	0.00889165	0.498132
LOC101927825	24.6352	4.44964	1.08685	4.09407	4.23859e-05	0.0297562		POM121L6P	13.8655	-5.78191	2.23353	-2.58869	0.00963409	0.510448
PNPLA7	7.68521	4.41806	1.4383	3.07173	0.00212825	0.242981		MAPK10	13.5754	-5.77015	2.37174	-2.43288	0.0149794	0.609473
CDC25A	2.97508	4.29147	1.96741	2.18128	0.0291629	0.801891		LOC102724149	13.5709	-5.76761	2.38085	-2.4225	0.0154141	0.617444
FUOM	18.3614	4.25013	0.928586	4.57699	4.71715e-06	0.00898953		RPS24	74.3173	-5.76041	1.68696	-3.41466	0.000638608	0.118017
LOC105372485	9.06488	4.16471	1.25889	3.30825	0.00093881	0.155076		ANO1	13.3177	-5.75121	2.32867	-2.46974	0.0135212	0.586398
TMEM120A	10.0937	4.14301	1.31806	3.14328	0.00167067	0.220774		RET	13.2916	-5.7406	2.37244	-2.4197	0.0155334	0.61941
SH2D6	3.58236	4.13776	2.00067	2.06819	0.0386224	0.887171		MTND4P12	13.108	-5.72648	2.29422	-2.49604	0.0125588	0.564086
PRSS36	8.92926	4.05587	1.40237	2.89216	0.00382605	0.329652		KLF3	13.1754	-5.72511	2.25204	-2.54219	0.0110161	0.53221
SAMHD1	15.7079	4.01803	1.00781	3.9869	6.6941e-05	0.0375958		FGFR2	13.1071	-5.7201	2.26015	-2.53085	0.0113788	0.540521
LOC107987072	4.72476	4.01748	1.6071	2.49983	0.0124254	0.561641		RHOB	13.0015	-5.71706	2.26911	-2.51952	0.0117514	0.547058
TM7SF2	5.13018	4.00163	1.59452	2.50962	0.0120863	0.549632		XPO5	13.4874	-5.70197	2.25322	-2.53059	0.0113871	0.540521
RIN1	3.36564	3.98124	1.94924	2.04246	0.0411056	0.923437		PDGFRA	12.9462	-5.70055	2.38073	-2.39445	0.0166452	0.629906
LOC107984690	29.9633	3.95059	0.949396	4.16115	3.16643e-05	0.0254049		WWC1	12.8296	-5.69327	2.25472	-2.52504	0.0115686	0.544838
FBXO36P1	19.7836	3.88036	0.890764	4.35622	1.32329e-05	0.0148638		MACF1	12.8823	-5.68938	2.26129	-2.51599	0.01187	0.547058
LOC107986762	18.6726	3.87795	0.958635	4.04528	5.22611e-05	0.0317889		DNHD1	12.9193	-5.68615	2.24745	-2.53005	0.0114047	0.540521
LOC105371516	9.04567	3.8709	1.34171	2.88505	0.00391356	0.331045		FGF19	12.5268	-5.6639	2.37719	-2.3826	0.0171908	0.632064
LOC105372435	13.1282	3.868	1.16752	3.31299	0.000923033	0.153599		XIST	12.4275	-5.65768	2.31273	-2.44632	0.0144322	0.598192
ITGB2	3.13003	3.85915	1.91256	2.0178	0.0436126	0.936719		DENND4C	12.8393	-5.65525	2.24266	-2.52168	0.0116797	0.546633
NAALADL1	22.7319	3.84171	0.900186	4.26768	1.97514e-05	0.0184881		TBC1D9B	12.4201	-5.65337	2.28105	-2.47841	0.0131971	0.576797
ICAM2	9.39255	3.83504	1.23004	3.11783	0.0018219	0.229758		LOC105372141	12.5582	-5.64252	2.24624	-2.51199	0.0120053	0.547058
PIK3R3	3.15371	3.82847	1.83492	2.08646	0.0369373	0.882763		CDH4	12.3227	-5.63013	2.3867	-2.35897	0.018326	0.655562
PRR29-AS1	3.04536	3.74928	1.89098	1.98272	0.047399	0.959309		CHD7	12.6132	-5.62829	2.23826	-2.51458	0.0119173	0.547058
CD19	4.91871	3.68732	1.58205	2.33072	0.0197682	0.684368		LOC105371887	68.7126	-5.62041	1.59472	-3.5244	0.000424448	0.0953521
GINS1	3.75385	3.65844	1.78862	2.0454	0.0408157	0.917843		TUBB8P1	12.1342	-5.61181	2.33333	-2.40506	0.0161698	0.622013
TEX54	4.4819	3.64885	1.63201	2.2358	0.0253647	0.763833		SH3KBP1	12.0366	-5.60911	2.33026	-2.40707	0.016081	0.622013
DMTN	3.54551	3.64731	1.76127	2.07084	0.0383733	0.884201		FGFR1	12.098	-5.60661	2.29854	-2.43921	0.0147196	0.603423
SPACA4	33.715	3.57793	0.985719	3.62977	0.000283677	0.0786961		NTRK3	11.5561	-5.54287	2.37967	-2.32926	0.0198453	0.684831
CHRM4	52.4408	3.54256	0.818381	4.32874	1.49964e-05	0.0155646		CHD6	11.4547	-5.53898	2.30416	-2.40391	0.0162208	0.622907
AGTRAP	4.99613	3.52468	1.55918	2.26059	0.0237844	0.745213		MYO1D	11.3702	-5.52861	2.30475	-2.39879	0.0164492	0.625263
RPL12P14	13.404	3.51052	1.06743	3.28875	0.00100633	0.158093		MGA	11.389	-5.51494	2.28899	-2.40933	0.0159817	0.622013
NOP9	49.0228	3.49526	0.834499	4.18846	2.80853e-05	0.023368		KDR	11.2427	-5.49862	2.39657	-2.29437	0.0217693	0.716563
MPV17L2	12.1646	3.45444	1.185	2.91515	0.00355521	0.322657		CYP3A5	11.2661	-5.49157	2.25202	-2.43851	0.0147481	0.603489
CORO1A-AS1	52.8524	3.44595	0.853019	4.03972	5.3516e-05	0.0317889		SPON1	11.1726	-5.48666	2.29024	-2.39567	0.0165899	0.629549
GPR20	6.04256	3.41927	1.41153	2.42239	0.0154189	0.617444		TCF21	11.0979	-5.48289	2.33969	-2.34343	0.0191074	0.673857
LOC107985693	4.17692	3.39416	1.61842	2.09721	0.0359753	0.872962		SPATS2L	10.9345	-5.47443	2.41091	-2.27069	0.0231659	0.735059
RAB37	4.97009	3.38835	1.56972	2.15857	0.0308836	0.823012		ZNF609	10.9853	-5.46964	2.28795	-2.39062	0.0168198	0.631795
MCCD1	11.9829	3.3515	1.31531	2.54806	0.0108324	0.530173		ITPRID2	10.8952	-5.46767	2.33412	-2.3425	0.0191551	0.674024
CNBD2	8.7569	3.32981	1.18339	2.81379	0.00489607	0.369094		ITGB8	10.9516	-5.45366	2.27901	-2.39299	0.0167115	0.629906
LOC107987266	9.99346	3.3196	1.39769	2.37506	0.017546	0.641974		MARCKS	59.0702	-5.42886	1.64899	-3.29223	0.000993963	0.157605
ELN	11.6292	3.28965	1.05704	3.11212	0.00185748	0.229758		PLAC9	11.0681	-5.42706	2.27466	-2.38588	0.0170383	0.632064
HYAL1	8.63568	3.28579	1.51114	2.17438	0.0296764	0.806318		RPL34	10.5067	-5.41924	2.41533	-2.24368	0.0248527	0.758756
SMIM35	6.88232	3.27617	1.29389	2.53203	0.0113404	0.540521		LOC107985544	10.5406	-5.41723	2.33723	-2.3178	0.0204601	0.699597
CYP2S1	8.41942	3.26079	1.33029	2.45119	0.0142387	0.59704		SMG1-DT	10.5418	-5.41711	2.34224	-2.31279	0.020734	0.70361
NFS1	24.5338	3.25973	0.82789	3.93739	8.23717e-05	0.042656		SLC6A6	10.6508	-5.41306	2.27873	-2.37547	0.0175266	0.641974
UAP1L1	4.41655	3.25492	1.56368	2.08158	0.0373809	0.88408		LOC100420851	10.395	-5.39247	2.34073	-2.30376	0.0212362	0.716541
OAS1	4.49408	3.23787	1.57387	2.05726	0.0396609	0.898169		NTRK1	10.373	-5.391	2.3912	-2.25452	0.0241635	0.751845
SLX9	21.6022	3.23547	0.846022	3.82433	0.000131129	0.0535601		C11orf71	10.3791	-5.38423	2.40729	-2.23663	0.0253103	0.763216
CGREF1	86.4568	3.21209	0.776032	4.13912	3.4864e-05	0.026409		GPM6B	10.411	-5.37396	2.27901	-2.35803	0.0183724	0.656179
SFN	15.7875	3.19902	0.933563	3.42668	0.000610999	0.11681		LOC105371762	10.2817	-5.37289	2.35055	-2.2858	0.022266	0.724937
TYRO3	4.85447	3.19291	1.54176	2.07095	0.0383636	0.884201		SRSF6	10.4624	-5.36697	2.28559	-2.34818	0.0188654	0.670588
RPS10P13	4.56513	3.17579	1.58226	2.00713	0.0447358	0.948104		GEN1	10.1887	-5.36313	2.39579	-2.23857	0.0251841	0.761455
TIMP1	10.5565	3.1723	1.27871	2.48085	0.0131068	0.576202		LOC105378116	10.1433	-5.35566	2.35135	-2.27769	0.022745	0.729741
TACO1	4.45677	3.16089	1.54083	2.05142	0.0402257	0.908211		LOC107984749	10.6602	-5.34892	2.29334	-2.33237	0.0196813	0.684368
OGG1	45.34	3.15792	0.685189	4.60884	4.04929e-06	0.00898953		LOC107987276	10.0675	-5.3421	2.29652	-2.32617	0.0200096	0.687333
CLUL1	15.8694	3.15397	1.05386	2.99277	0.00276455	0.273593		LOC105372864	10.031	-5.32946	2.27217	-2.34554	0.0189995	0.673224
LOC107985050	1180.71	3.15137	0.555579	5.67223	1.40953e-08	0.000158325		LOC105378513	9.94938	-5.32627	2.36224	-2.25476	0.0241487	0.751845
DNAJB1	895.172	3.13429	0.733121	4.27527	1.90907e-05	0.0184881		ARID2	9.8971	-5.31911	2.35001	-2.26344	0.0236083	0.742978
LOC107986973	7.4752	3.13228	1.28001	2.44709	0.0144016	0.598026		ATP11A	9.76767	-5.31568	2.36958	-2.24331	0.0248771	0.758756
GMPPA	4.52536	3.1184	1.54505	2.01832	0.0435582	0.936719		SEMA6A	9.94835	-5.30395	2.29216	-2.31396	0.0206701	0.702955
LOC221946	4.52536	3.1184	1.54505	2.01832	0.0435582	0.936719		ANXA1	9.68234	-5.30368	2.40519	-2.2051	0.0274474	0.786487
DLGAP1	4.02644	3.11803	1.58426	1.96813	0.0490532	0.967916		MAF	54.2777	-5.30364	1.62203	-3.26975	0.00107641	0.163389
CHRM1	15.2708	3.11046	0.998303	3.11574	0.00183481	0.229758		LOC101928212	9.73232	-5.29609	2.3314	-2.27163	0.0231087	0.734516
LOC105372815	39.6322	3.08144	0.81309	3.78979	0.000150776	0.0551786		SREBF2	9.63972	-5.2814	2.29958	-2.29668	0.0216368	0.716563
STK16	63.4325	3.05599	0.928421	3.29159	0.00099621	0.157605		TSC1	9.51446	-5.25839	2.33206	-2.25482	0.0241445	0.751845
BSPRY	4.5419	3.05252	1.52654	1.99963	0.04554	0.949229		LOC101927179	52.5262	-5.25716	1.67165	-3.14489	0.0016615	0.220774
BRSK1	7.98662	3.03787	1.32063	2.30032	0.0214302	0.716541		LINC01738	9.57746	-5.25598	2.2973	-2.28789	0.0221438	0.724105
FAM86JP	153.201	3.00093	0.627895	4.77934	1.75868e-06	0.00658481		ZCCHC14	9.53369	-5.25049	2.28088	-2.30195	0.0213378	0.716541
SYVN1	58.0847	2.9985	0.843059	3.55669	0.000375553	0.0878833		LOC102723665	9.45413	-5.24968	2.42285	-2.16674	0.0302549	0.813984
LOC102725238	78.0092	2.972	0.614288	4.83813	1.31069e-06	0.00588893		LRRK1	9.39316	-5.24745	2.30124	-2.28027	0.0225914	0.7276
LOC105374841	218.151	2.95583	0.57227	5.16509	2.40317e-07	0.00134968		LOC107986192	9.26847	-5.22419	2.32226	-2.24962	0.0244731	0.754169
FAM189A1	81.3575	2.9541	0.699584	4.22265	2.41449e-05	0.0208621		TRRAP	9.25852	-5.2099	2.28336	-2.28168	0.0225081	0.72658
LOC107984715	5.80428	2.94861	1.3533	2.17883	0.0293444	0.802949		NLRP6	9.09008	-5.20834	2.3555	-2.21114	0.0270264	0.782406
ANKRD13C	36.3018	2.94234	0.726701	4.0489	5.14592e-05	0.0317889		LOC143666	9.18411	-5.20279	2.31625	-2.24621	0.0246903	0.757742
REX1BD	10.948	2.93502	1.09185	2.68812	0.00718546	0.438645		CMTM4	9.24389	-5.19431	2.30157	-2.25686	0.0240171	0.751455
TONSL-AS1	206.336	2.92932	0.660965	4.43188	9.3415e-06	0.012592		CCT2	9.26589	-5.18791	2.29368	-2.26183	0.0237082	0.743862
MIR1184-3	13.6845	2.91741	1.31561	2.21754	0.0265861	0.781435		ASAP2	8.93682	-5.18553	2.4144	-2.14775	0.0317338	0.836737
BSG-AS1	32.3813	2.91585	0.79322	3.67597	0.000236946	0.0726087		LOC115308161	9.04267	-5.18157	2.34118	-2.21323	0.0268818	0.781435
SRGAP2	5.71189	2.90958	1.46591	1.98483	0.0471639	0.959309		MYO5B	8.98104	-5.16872	2.32265	-2.22536	0.0260571	0.77049
IGFBP6	31.2538	2.90597	0.851273	3.41368	0.000640914	0.118017		LOC105371932	8.92605	-5.16674	2.30619	-2.24038	0.0250665	0.758951
LOC105376806	4.82889	2.90219	1.46651	1.97898	0.0478184	0.960566		CCDC39	9.0039	-5.15644	2.28978	-2.25193	0.0243266	0.753564
PYCARD	13.2005	2.90003	0.987775	2.93592	0.00332556	0.307574		LOC105378518	8.76262	-5.14765	2.3592	-2.18195	0.0291134	0.801891
DUOXA2	8.99543	2.88706	1.13507	2.54351	0.0109743	0.531333		DGKD	8.78842	-5.1388	2.30483	-2.22957	0.0257757	0.77049
LOC107984670	18.2922	2.88033	0.913228	3.15401	0.00161043	0.217893		KIT	8.57159	-5.11805	2.41871	-2.11602	0.0343427	0.863952
TMEM125	9.56474	2.87289	1.12495	2.55379	0.0106557	0.526626		YTHDC1	8.81209	-5.11615	2.30667	-2.21797	0.0265566	0.781435
LOC100130698	7.29108	2.85882	1.43144	1.99716	0.0458076	0.951959		TAPT1-AS1	8.54076	-5.11577	2.4162	-2.11728	0.034236	0.8632
ATP6V0C	12.9732	2.84182	1.10075	2.58172	0.00983096	0.514931		NOD1	8.42144	-5.08931	2.33107	-2.18325	0.0290175	0.800994
MYBL2	24.0711	2.83028	1.00834	2.80687	0.00500256	0.370245		RB1	8.38927	-5.08681	2.42596	-2.09683	0.0360088	0.872962
MIR1184-1	103.454	2.81241	1.04042	2.70315	0.00686858	0.42739		SMARCE1	8.60509	-5.08619	2.31279	-2.19916	0.0278667	0.790565
SYNGR2	25.4882	2.80858	0.80971	3.46862	0.000523133	0.106838		LOC107985184	8.39261	-5.08016	2.32207	-2.18777	0.0286865	0.800096
KCNK15-AS1	10.2619	2.79053	1.17563	2.37365	0.017613	0.643376		NCK2	8.25914	-5.07142	2.34901	-2.15896	0.0308531	0.823012
DNAJC4	59.3698	2.76833	0.669449	4.13524	3.54583e-05	0.026409		DMTF1-AS1	8.28883	-5.0671	2.42788	-2.08705	0.036884	0.882763
PAQR4	258.943	2.75819	0.581163	4.74599	2.07489e-06	0.00665892		FABP3	8.61913	-5.06165	2.3069	-2.19414	0.0282255	0.795906
EFCAB5	72.316	2.74515	0.790485	3.47274	0.00051518	0.106179		LTO1P1	8.21018	-5.05396	2.36964	-2.13279	0.0329416	0.849635
HAX1	15.5374	2.73984	0.973103	2.81557	0.00486901	0.369094		SLC47A1P1	8.24949	-5.04834	2.32127	-2.17482	0.0296437	0.806318
LOC107986126	2314.64	2.73424	0.721946	3.78731	0.000152285	0.0551786		LINC02088	8.07	-5.03733	2.44526	-2.06004	0.0393947	0.894047
NDUFA13	12.9834	2.73272	1.10949	2.46303	0.0137769	0.586707		LOC101927454	8.14179	-5.03491	2.38582	-2.11035	0.0348282	0.866368
PCYT2	30.5813	2.72987	0.786015	3.47305	0.000514583	0.106179		PBLD	8.04094	-5.03112	2.36701	-2.12551	0.0335438	0.858687
SMIM45	173.656	2.72657	0.746666	3.65166	0.000260547	0.0770156		CLIC4	8.0702	-5.01722	2.30923	-2.17268	0.0298041	0.806513
BNIP3P11	68.721	2.72251	0.698157	3.89956	9.63665e-05	0.0460611		BCL9	8.0292	-5.0149	2.33837	-2.14462	0.0319836	0.839487
LOC107985553	35.4846	2.72023	0.876127	3.10483	0.00190386	0.230291		ZNF354C	44.135	-5.00719	1.67084	-2.99682	0.00272814	0.271795
FARSA-AS1	322.165	2.71947	0.73784	3.68572	0.000228059	0.0721599		FBXL12	7.89314	-5.00217	2.3689	-2.11159	0.0347213	0.86572
DCXR	9.40006	2.71759	1.13948	2.38495	0.0170815	0.632064		SHROOM3	7.81999	-4.99254	2.40595	-2.07508	0.0379794	0.884201
MTHFR	11.8153	2.71155	1.04569	2.59308	0.00951203	0.509289		THAP9	7.9455	-4.99029	2.33255	-2.13941	0.0324023	0.841523
PSMG3-AS1	8.7709	2.70546	1.23432	2.19186	0.0283897	0.798217		SPATA7	7.90763	-4.98811	2.40722	-2.07215	0.0382518	0.884201
ACBD4	8.25421	2.70388	1.17576	2.29969	0.0214659	0.716541		KDM5A	7.81203	-4.9823	2.36091	-2.11033	0.0348303	0.866368
ERCC2	22.5917	2.70163	0.921595	2.93147	0.0033736	0.309338		LOC101929204	7.80118	-4.97145	2.33437	-2.12967	0.0331985	0.852348
ABHD14B	6.07687	2.6934	1.33543	2.01688	0.0437076	0.936919		VLDLR-AS1	7.69102	-4.95698	2.38314	-2.08002	0.0375236	0.88408
KCNH3	25.4579	2.687	0.883846	3.04013	0.00236479	0.258577		PDGFRB	7.63697	-4.95512	2.43442	-2.03544	0.0418066	0.92661
CTDNEP1	37.2423	2.68605	0.770997	3.48386	0.000494243	0.10492		CLINT1	7.84911	-4.94968	2.35338	-2.10322	0.0354463	0.869779
LRRC8E	24.1639	2.67298	1.04708	2.55278	0.0106866	0.526626		NSUN7	85.1534	-4.94599	1.22468	-4.0386	5.37716e-05	0.0317889
FIBP	9.20947	2.66072	1.1548	2.30406	0.0212193	0.716541		ZNF664	7.65607	-4.93202	2.35928	-2.09048	0.0365751	0.87878
DNAAF3	9.67165	2.65757	1.18612	2.24056	0.0250545	0.758951		LOC101927673	7.67348	-4.9314	2.31111	-2.13378	0.0328609	0.848529
MIR762	202.028	2.656	0.654791	4.05625	4.98662e-05	0.0317889		PRR15	7.60289	-4.93056	2.32311	-2.1224	0.0338044	0.859044
ENO3	26.9936	2.65346	0.94339	2.81269	0.00491292	0.369126		PARP4	7.5906	-4.92443	2.34325	-2.10154	0.0355937	0.871279
FARSA	12.5947	2.65236	1.06208	2.49733	0.0125133	0.563348		GLIPR1L1	7.63628	-4.92105	2.32934	-2.11264	0.0346316	0.865331
TUBA1B	72.3391	2.6509	0.879893	3.01275	0.00258892	0.263168		ASXL2	7.46559	-4.91863	2.34847	-2.0944	0.0362243	0.874728
LOC105371452	43.0206	2.65009	1.11101	2.3853	0.0170652	0.632064		MCC	7.66877	-4.91786	2.35691	-2.08657	0.0369271	0.882763
TRIP6	12.1095	2.64776	1.1314	2.34025	0.019271	0.675386		MARCKSL1P1	7.57875	-4.91475	2.31772	-2.12052	0.0339625	0.860062
RRP7A	9.85478	2.64563	1.26261	2.09537	0.036138	0.873885		LOC107986086	7.76259	-4.91317	2.36281	-2.07938	0.0375827	0.88408
LOC105373608	32.1232	2.64298	0.919913	2.87308	0.00406491	0.336746		CEBPG	7.33458	-4.9067	2.40501	-2.0402	0.0413308	0.925097
DYNLRB1	35.2301	2.63691	0.731355	3.60552	0.000311533	0.0804436		RANBP2	7.74004	-4.90425	2.32043	-2.11351	0.0345574	0.864979
LOC105371795	245.234	2.63643	0.563539	4.67835	2.89195e-06	0.00812096		B4GALT1	7.53282	-4.89599	2.32209	-2.10844	0.034993	0.867679
MRPL38	8.91747	2.63096	1.23473	2.1308	0.0331059	0.851918		ATP6V1G1	7.24153	-4.89016	2.48511	-1.96778	0.049093	0.967916
GPR137	343.359	2.62718	0.568075	4.6247	3.75135e-06	0.00898953		LOC105375216	7.49259	-4.88475	2.32988	-2.09657	0.0360317	0.872962
PTPA	14.959	2.62467	1.00154	2.62064	0.00877653	0.496637		CEACAM1	7.30115	-4.87833	2.34975	-2.07611	0.0378842	0.884201
LOC105372261	25.9914	2.62309	0.854043	3.07138	0.00213075	0.242981		ARHGAP42-AS1	7.37719	-4.87701	2.41115	-2.02269	0.0431048	0.931106
KLHDC3	13.3357	2.62079	1.04474	2.50855	0.0121229	0.550184		GNPDA2	7.49337	-4.87372	2.34371	-2.07949	0.0375728	0.88408
GPATCH3	6.67032	2.61761	1.32713	1.97238	0.0485663	0.966379		ATF6B	7.32438	-4.87155	2.33786	-2.08376	0.0371819	0.882971
LINC02908	13.5894	2.61675	0.97599	2.68113	0.00733749	0.444304		TES	7.16186	-4.87104	2.402	-2.02791	0.0425697	0.928753
GPX3	13.912	2.60758	0.982561	2.65386	0.00795768	0.460746		NTRK2	7.23131	-4.87074	2.45464	-1.9843	0.0472224	0.959309
LOC100996842	126.384	2.60452	0.814054	3.19944	0.00137694	0.197329		PTPRD	7.20069	-4.859	2.47493	-1.96329	0.0496126	0.967916
PPP1R11	12.6893	2.60155	0.998124	2.60644	0.00914885	0.500764		CLCN1	7.18941	-4.8525	2.41921	-2.00582	0.0448756	0.948597
LOC101929937	260.513	2.59655	0.568165	4.57006	4.87595e-06	0.00898953		NEBL-AS1	7.09882	-4.84393	2.45955	-1.96944	0.048903	0.967916
E2F1	8.5955	2.57305	1.18888	2.16426	0.0304443	0.815173		KCNQ1	7.19846	-4.84246	2.32977	-2.07851	0.0376623	0.884101
CDT1	27.8723	2.56805	0.779373	3.29502	0.000984154	0.157605		SOX13	7.1588	-4.83027	2.32969	-2.07335	0.0381393	0.884201
CRABP2	49.5654	2.55902	0.712513	3.59154	0.000328731	0.0806		GRAMD2A	7.02742	-4.81604	2.34608	-2.0528	0.0400915	0.906093
RHOT1	15.6927	2.54964	0.927298	2.74954	0.00596798	0.394325		NLRP9	6.99972	-4.81536	2.37609	-2.02659	0.0427042	0.930504
COPRS	10.106	2.54706	1.20526	2.11329	0.034576	0.864979		FLT4	6.90713	-4.81321	2.45368	-1.96162	0.0498063	0.967916
LOC107987209	735.76	2.54095	0.57389	4.4276	9.52882e-06	0.012592		JAG1	6.90478	-4.80891	2.36653	-2.03205	0.0421487	0.92661
CLN6	12.084	2.53562	1.17156	2.16431	0.0304406	0.815173		G0S2	6.97301	-4.80758	2.4197	-1.98685	0.0469393	0.959309
GIPC1	23.1635	2.50877	0.977847	2.56561	0.0102995	0.525346		MAP3K1	6.91135	-4.80408	2.40043	-2.00134	0.0453558	0.949229
DDX19B	13.3914	2.50832	0.976481	2.56873	0.0102072	0.524725		LOC105374291	7.16447	-4.80274	2.3611	-2.03411	0.0419401	0.92661
CLIP3	51.2933	2.48915	0.760767	3.27189	0.0010683	0.16326		CTDSPL2	7.18358	-4.79857	2.3622	-2.0314	0.0422145	0.92661
TADA3	48.2456	2.4882	0.722995	3.44152	0.000578447	0.112998		ZNF233	7.28188	-4.79811	2.35913	-2.03385	0.0419667	0.92661
MRPL51	7.50528	2.48726	1.24946	1.99066	0.0465182	0.955238		TMPRSS2	6.87416	-4.79673	2.36189	-2.03088	0.0422667	0.92661
YIF1A	9.2972	2.48561	1.14791	2.16533	0.0303622	0.815173		PHF3	6.82634	-4.77604	2.3471	-2.03487	0.041864	0.92661
TTC16	8.81379	2.47351	1.13444	2.18038	0.0292293	0.801919		SYNE2	6.73977	-4.76599	2.36667	-2.01379	0.0440313	0.939375
PAQR7	10.6402	2.47255	1.10781	2.23193	0.0256199	0.769453		JPH3	6.95624	-4.76348	2.34419	-2.03203	0.0421501	0.92661
THEM6	9.59087	2.46895	1.10953	2.22523	0.026066	0.77049		PDZD8	6.78422	-4.76045	2.37441	-2.0049	0.0449736	0.948597
KRI1	151.517	2.46002	0.61586	3.99445	6.48439e-05	0.0373517		NSD3	6.74121	-4.75621	2.35058	-2.02342	0.0430303	0.931106
MTCH1	11.0992	2.45969	1.08101	2.27536	0.0228842	0.732326		COL27A1	6.67364	-4.75444	2.37862	-1.99882	0.0456275	0.949229
PLEKHB1	16.5895	2.45789	1.08595	2.26335	0.0236139	0.742978		LOC105376278	6.87805	-4.75242	2.33658	-2.03393	0.0419591	0.92661
STAB1	206.095	2.45558	0.731849	3.35531	0.000792751	0.140675		ZBTB44	6.78623	-4.74987	2.33693	-2.03253	0.0421004	0.92661
UCP2	10.8402	2.44613	1.06351	2.30006	0.0214449	0.716541		ZDHHC3	6.92552	-4.74769	2.34716	-2.02274	0.0431	0.931106
MIR762HG	354.097	2.44274	0.557313	4.38307	1.17017e-05	0.0146044		UTP20	6.84028	-4.74159	2.34039	-2.02598	0.0427667	0.930963
VAT1	28.6066	2.43906	0.83752	2.91224	0.00358846	0.322657		EYS	6.73886	-4.74046	2.34361	-2.02271	0.043103	0.931106
TECR	21.5524	2.43458	1.04501	2.32973	0.0198202	0.684831		RREB1	6.6381	-4.73893	2.36612	-2.00283	0.0451956	0.949229
ESRRA	196.697	2.43402	0.921368	2.64175	0.00824789	0.470276		MARCHF3	6.5398	-4.73537	2.40242	-1.97108	0.0487142	0.967607
AFMID	1182.26	2.43087	0.542818	4.47824	7.526e-06	0.0112714		CDCA7	6.80834	-4.72548	2.35853	-2.00357	0.0451164	0.949229
ITM2C	18.0986	2.42902	0.890792	2.72681	0.00639503	0.40762		CDKN2B	6.50327	-4.72539	2.40728	-1.96296	0.0496511	0.967916
KRT7-AS	130.473	2.424	0.618185	3.92116	8.81222e-05	0.0439926		EREG	6.68522	-4.72294	2.36544	-1.99665	0.0458635	0.95224
CFAP119	84.4964	2.42055	0.633741	3.81946	0.000133744	0.0536527		PDGFA	6.51935	-4.72212	2.38857	-1.97696	0.0480456	0.962841
ZNF48	20.7541	2.42023	0.883375	2.73975	0.00614854	0.399211		PI4KA	6.46932	-4.72051	2.40458	-1.96313	0.0496308	0.967916
CD81-AS1	445.089	2.41977	0.657691	3.67919	0.000233975	0.0726087		LOC107984029	6.76106	-4.71786	2.35982	-1.99924	0.045582	0.949229
LOC389602	20.1167	2.40979	0.859975	2.80216	0.00507613	0.370245		LOC105376789	6.74632	-4.70924	2.3483	-2.00538	0.0449225	0.948597
TMC3	7.81472	2.39731	1.18444	2.024	0.0429703	0.931106		BOC	6.60066	-4.70161	2.34825	-2.00217	0.0452661	0.949229
C2CD4D-AS1	19.9295	2.39703	1.09602	2.18702	0.0287407	0.800096		LOC105375120	6.77603	-4.69598	2.36133	-1.9887	0.0467345	0.957929
PAFAH1B3	35.8331	2.39451	0.714356	3.35198	0.00080235	0.140778		GNL2	6.58468	-4.69279	2.34713	-1.99938	0.0455676	0.949229
POU5F1	11.4348	2.38689	1.03981	2.29551	0.0217041	0.716563		FBXO31	6.38317	-4.69085	2.37808	-1.97254	0.0485478	0.966379
MPST	14.3432	2.38542	1.03771	2.29873	0.0215201	0.716563		ZC3H12B	6.59306	-4.69046	2.3545	-1.99212	0.0463575	0.954557
ENKD1	18.1949	2.37736	0.869268	2.7349	0.00623997	0.401796		FRAT2	6.42047	-4.68872	2.36967	-1.97864	0.047857	0.960566
LOC112268131	74.6489	2.36704	0.634395	3.73118	0.000190588	0.0648721		MIR4665	6.56937	-4.68543	2.35078	-1.99314	0.046246	0.953744
SLC25A1	26.8079	2.36469	0.831743	2.84305	0.00446841	0.357234		LOC107986981	6.74418	-4.68401	2.38772	-1.9617	0.0497969	0.967916
MYL6B	12.1725	2.348	1.0271	2.28606	0.0222506	0.724937		SNX5	6.40516	-4.68185	2.36484	-1.97978	0.0477286	0.959913
DTX1	13.1914	2.34758	1.06019	2.2143	0.026808	0.781435		MAML1	6.39042	-4.6745	2.35541	-1.98458	0.0471908	0.959309
EIF4A3	12.9521	2.34338	0.975123	2.40317	0.0162538	0.623109		ASPH	34.9162	-4.66756	1.61879	-2.88337	0.00393449	0.331045
JMJD4	86.7615	2.32961	0.624005	3.73332	0.000188974	0.0648721		TACC2	6.43487	-4.66756	2.35742	-1.97994	0.0477104	0.959913
ELP2	37.3659	2.3294	0.747246	3.11731	0.0018251	0.229758		SCAF11	6.5268	-4.65578	2.36921	-1.96512	0.0494005	0.967916
CDC34	11.997	2.32853	1.05574	2.20558	0.0274134	0.786487		CRNDE	6.26675	-4.65533	2.36455	-1.9688	0.0489757	0.967916
TIMM17B	372.524	2.32017	0.636511	3.64513	0.000267257	0.0779731		ZBED3	6.22062	-4.64617	2.36791	-1.96214	0.0497463	0.967916
GABARAP	12.4749	2.30935	1.07343	2.15137	0.031447	0.832821		LOC727980	6.39074	-4.64526	2.35916	-1.96903	0.0489492	0.967916
LOC102725044	212.487	2.30246	0.641313	3.59023	0.000330391	0.0806		CEP57	6.36526	-4.64	2.3653	-1.96169	0.0497981	0.967916
LOC105371380	10.6126	2.30185	1.04758	2.19729	0.0279998	0.792211		RNF145	6.23424	-4.63802	2.36476	-1.96131	0.0498434	0.967916
LOC105375489	765.966	2.30157	0.639015	3.60175	0.000316079	0.0806		NFE2L3	33.5963	-4.60648	1.60776	-2.86516	0.00416797	0.339947
DHPS	71.5432	2.29885	0.642675	3.577	0.000347562	0.0829972		LRATD2	32.456	-4.56681	1.66217	-2.74749	0.00600526	0.394468
NFKBIB	268.593	2.29385	0.590914	3.88186	0.000103659	0.0471051		FBXW8	31.5301	-4.51601	1.6102	-2.80463	0.00503749	0.370245
AGAP2-AS1	32.3176	2.28498	0.776783	2.94159	0.00326527	0.305718		LOC100996506	93.5474	-4.49284	1.24267	-3.61547	0.000299804	0.0792364
SIGLEC12	19.1375	2.28081	0.926121	2.46275	0.0137876	0.586707		PVRIG	61.3087	-4.4722	1.34259	-3.33103	0.000865266	0.147259
LOC107984837	251.392	2.26503	0.633675	3.57444	0.000350979	0.0829972		BEND3P3	87.0317	-4.38849	1.21022	-3.62621	0.000287611	0.0786961
MDK	32.0333	2.26404	0.766687	2.95302	0.00314685	0.299774		RPS7	26.8608	-4.29267	1.84367	-2.32833	0.0198945	0.685475
MIPOL1	69.0714	2.26097	0.66017	3.42483	0.000615179	0.11681		CYP19A1	26.2186	-4.25033	1.70135	-2.49821	0.0124821	0.563072
C15orf61	40.4544	2.2595	0.732819	3.0833	0.00204717	0.238289		LOC101928076	25.9978	-4.22902	1.6559	-2.55391	0.010652	0.526626
LOC101929188	15.6817	2.25717	0.915347	2.46592	0.0136662	0.586707		ZMYM4-AS1	25.5993	-4.21927	1.6848	-2.50431	0.0122691	0.555696
LOC107984648	133.956	2.25404	0.618958	3.64168	0.000270868	0.0780134		KLF5	25.1241	-4.1877	1.62977	-2.5695	0.0101846	0.524725
LLGL1	21.9034	2.24017	0.937528	2.38944	0.0168741	0.631795		CA12	24.5662	-4.14398	1.61939	-2.55898	0.0104979	0.526626
MED22	10.8392	2.23524	1.11286	2.00855	0.0445846	0.947582		SOX9	24.1554	-4.13406	1.66182	-2.48767	0.0128584	0.570714
FAM151A	229.538	2.23384	0.565632	3.94929	7.8383e-05	0.0419256		DDX31	24.0761	-4.12751	1.66468	-2.47947	0.0131579	0.576202
LOC105371824	89.7454	2.22672	0.663813	3.35444	0.000795272	0.140675		SLC7A11-AS1	96.691	-4.11971	1.08201	-3.80744	0.000140412	0.0551786
LOC105374809	301.244	2.21865	0.558437	3.97296	7.09855e-05	0.0388948		SRSF2	23.9094	-4.11232	1.62629	-2.52865	0.0114503	0.541538
DNAAF3-AS1	139.2	2.21222	0.679322	3.25652	0.00112788	0.168919		SPAG4	95.9317	-4.10855	0.970207	-4.23471	2.28844e-05	0.020564
CARMIL2	19.6846	2.20492	1.02228	2.15687	0.0310161	0.825564		SMURF1	23.1896	-4.0648	1.63626	-2.4842	0.0129844	0.571948
SPR	9.84559	2.19549	1.11243	1.9736	0.0484276	0.966083		ANO9	22.8699	-4.05806	1.71838	-2.36156	0.0181982	0.654117
DNAJC17	1888.95	2.19446	0.531481	4.12895	3.64424e-05	0.026409		LINC01342	22.2837	-4.01869	1.68659	-2.38273	0.0171848	0.632064
PRDX5	20.7912	2.19428	0.881335	2.48973	0.0127842	0.568706		ADD3-AS1	89.732	-4.01265	1.16313	-3.44986	0.000560883	0.112198
PRR19	1290.98	2.19329	0.57667	3.80338	0.000142737	0.0551786		LOC105375751	445.974	-3.9976	0.924267	-4.32516	1.52424e-05	0.0155646
MAP3K11	19.7699	2.18866	1.00237	2.18349	0.0289998	0.800994		CREBBP	21.779	-3.98846	1.77273	-2.2499	0.0244556	0.754169
CST3	27.9802	2.18495	0.79023	2.76495	0.00569308	0.387164		TRIM44	21.2943	-3.93109	1.62848	-2.41396	0.01578	0.619753
EMC9	33.5185	2.17931	0.782486	2.78511	0.00535099	0.381436		LOC105369828	62.954	-3.91568	1.08499	-3.60897	0.000307414	0.0803029
BCL2L12	766.739	2.16905	0.558719	3.88219	0.00010352	0.0471051		AKAP17A	20.6796	-3.91354	1.74181	-2.24683	0.0246511	0.757575
NR2C2AP	352.943	2.16341	0.585415	3.69551	0.000219444	0.0714466		AFAP1L2	20.9373	-3.89916	1.63272	-2.38813	0.0169342	0.632064
ABI2	31.4035	2.15954	0.745484	2.89683	0.00376954	0.328228		CHDH	40.4181	-3.84598	1.22005	-3.15232	0.00161977	0.217893
C20orf144	15.0236	2.15721	1.0059	2.14457	0.0319876	0.839487		LOC105371730	59.6779	-3.84124	1.20076	-3.199	0.00137906	0.197329
RAD9A	1271.31	2.152	0.614037	3.50467	0.000457165	0.100688		LOC112268058	38.7727	-3.80269	1.30517	-2.91356	0.00357331	0.322657
SLC25A11	72.7848	2.14681	0.656103	3.27206	0.00106769	0.16326		NTPCR	39.168	-3.80055	1.22934	-3.09154	0.00199122	0.235095
P2RX2	15.357	2.14346	0.97492	2.1986	0.0279064	0.790565		TTC6	38.2911	-3.78806	1.35142	-2.80302	0.00506258	0.370245
MELTF-AS1	46.6112	2.14216	0.829701	2.58185	0.00982731	0.514931		ADGRL1	19.1091	-3.78499	1.66208	-2.27726	0.0227709	0.729741
BICDL2	31.8048	2.14175	0.771006	2.77786	0.00547182	0.381753		UBA5	18.8625	-3.77316	1.69483	-2.22627	0.025996	0.77049
EXOSC4	14.9493	2.12631	0.953717	2.22949	0.0257811	0.77049		LOC107985898	37.2974	-3.74755	1.39757	-2.68149	0.00732961	0.444304
LOC100506071	20.5662	2.11546	0.996756	2.12234	0.033809	0.859044		LOC112268092	19.2805	-3.73712	1.77468	-2.1058	0.0352214	0.868549
FUZ	176.455	2.11194	0.926286	2.28001	0.0226069	0.7276		SLC31A2	18.5272	-3.73426	1.70078	-2.19561	0.0281196	0.7946
TPI1	89.3732	2.10958	0.909884	2.31851	0.0204215	0.699597		MGST2	36.9567	-3.72776	1.23711	-3.01329	0.00258429	0.263168
PPFIA3	11.2213	2.10272	1.05385	1.99527	0.046013	0.953158		LOC727978	18.1093	-3.70842	1.67355	-2.2159	0.026698	0.781435
SNX32	4729.29	2.09319	0.831354	2.51781	0.0118086	0.547058		MZB1	18.0638	-3.7046	1.68925	-2.19305	0.028304	0.796804
LOC105372385	16.2207	2.09219	0.946992	2.2093	0.027154	0.78408		CEBPD	17.9023	-3.7015	1.74656	-2.11931	0.0340645	0.86081
NELFB	23.256	2.0906	0.810234	2.58024	0.00987312	0.515813		PODXL	17.9166	-3.68799	1.6565	-2.22638	0.0259889	0.77049
NR1D1	118.057	2.08864	0.617772	3.38092	0.000722448	0.130885		NUP153-AS1	71.7292	-3.68492	1.10284	-3.34131	0.000833855	0.142997
EHD1	15.8806	2.08529	0.93625	2.22727	0.025929	0.77049		GGACT	35.9445	-3.6605	1.31506	-2.78352	0.00537731	0.381436
SCO2	31.3978	2.08051	0.748616	2.77914	0.0054503	0.381436		RPL26	52.5476	-3.65733	1.26242	-2.89707	0.00376667	0.328228
TMEM198	102.799	2.07596	0.871054	2.38327	0.0171596	0.632064		RPL31	70.2485	-3.65727	1.00135	-3.65234	0.000259866	0.0770156
CABP7	255.185	2.06725	0.560716	3.68681	0.000227084	0.0721599		RAB15	17.6526	-3.6459	1.65538	-2.20245	0.0276334	0.789803
TSR3	71.151	2.06654	0.661119	3.12583	0.00177306	0.228919		ANKRD13A	17.6973	-3.63514	1.66194	-2.18729	0.0287212	0.800096
ZNRD2-DT	24.8896	2.06312	0.857795	2.40515	0.016166	0.622013		LOC107985367	34.4687	-3.62996	1.29645	-2.79993	0.00511141	0.370412
SHBG	84.9631	2.06059	0.736434	2.79807	0.00514086	0.371348		USP6NL-AS1	51.6048	-3.62725	1.10527	-3.28177	0.00103157	0.160931
SLC22A18AS	373.068	2.05927	0.744267	2.76685	0.00566016	0.387164		NR2F2	16.9873	-3.62147	1.70632	-2.12239	0.0338054	0.859044
PDK2	40.7515	2.05662	0.708352	2.90339	0.00369151	0.327786		NIPA2	17.6363	-3.61883	1.68945	-2.14201	0.0321923	0.841523
EML2-AS1	12.7242	2.05278	0.993649	2.0659	0.0388382	0.8894		TOP1	16.87	-3.60855	1.67905	-2.14916	0.0316218	0.834763
APBA3	33.0435	2.05234	0.836492	2.45351	0.0141471	0.596273		RPL37	50.3897	-3.59697	1.18623	-3.03228	0.00242716	0.258577
CDHR2	29.5517	2.04691	0.795145	2.57426	0.0100454	0.520805		WARS1P1	16.5889	-3.58737	1.73022	-2.07336	0.0381392	0.884201
APOBEC3B-AS1	104.973	2.0467	0.713073	2.87025	0.00410142	0.337503		RPL3P4	81.9855	-3.55106	0.988025	-3.5941	0.000325509	0.0806
PDXP-DT	541.868	2.04227	0.533666	3.82686	0.000129786	0.0535601		ABTB2	15.9276	-3.52969	1.69727	-2.07962	0.0375602	0.88408
C1orf147	24.3956	2.02725	0.796864	2.54404	0.0109578	0.531333		LOC101927764	16.1091	-3.52713	1.66987	-2.11223	0.0346672	0.865331
RPP25	14.4427	2.02287	0.95244	2.12388	0.0336803	0.859044		SOX4	16.0586	-3.5152	1.70618	-2.06027	0.0393724	0.894047
KRT10	29.1047	2.01439	0.798028	2.5242	0.0115961	0.544993		CAB39L	15.6328	-3.50443	1.78529	-1.96295	0.0496521	0.967916
NCAPH2	529.097	2.01101	0.518422	3.87911	0.000104841	0.0471051		GALNT7-DT	47.4152	-3.50326	1.14473	-3.06033	0.00221093	0.247217
LOC107985072	17.9323	2.01096	0.965732	2.08232	0.037313	0.88408		IQGAP1	15.6008	-3.4989	1.72476	-2.02863	0.0424963	0.928677
IDH3G	29.0821	2.01045	0.77148	2.60597	0.00916154	0.500764		RAB28P5	47.4807	-3.49061	1.05793	-3.29947	0.000968671	0.156555
RCCD1-AS1	449.665	2.00996	0.586998	3.42414	0.000616758	0.11681		MMP24-AS1-EDEM2	15.4833	-3.48812	1.7558	-1.98662	0.0469644	0.959309
PINK1-AS	598.204	2.00503	0.585707	3.42326	0.000618755	0.11681		CKAP4	15.3921	-3.4835	1.71626	-2.0297	0.0423872	0.927194
WDR46	82.8162	2.00229	0.617504	3.24255	0.00118465	0.176246		TIGIT	78.4798	-3.48209	0.957635	-3.63613	0.000276761	0.0786961
IGFBP4	49.7215	1.99217	0.930681	2.14055	0.0323101	0.841523		WRNIP1	15.2009	-3.46038	1.72331	-2.00799	0.0446447	0.947962
RECQL5	16.317	1.98803	0.974167	2.04075	0.0412758	0.925097		NBEAP6	14.9802	-3.43707	1.73934	-1.97608	0.0481453	0.96398
TMEM238	23.0938	1.9861	0.839333	2.36629	0.0179675	0.649984		MID1IP1-AS1	45.6667	-3.42535	1.08014	-3.17122	0.00151801	0.210506
SIGIRR	17.8065	1.97987	0.909329	2.17729	0.0294588	0.804121		LOC105371059	59.9918	-3.42397	1.10134	-3.1089	0.00187787	0.229758
PRICKLE3	564.52	1.97805	0.690536	2.86451	0.00417651	0.339947		PCNX4-DT	29.8169	-3.42089	1.41684	-2.41445	0.015759	0.619753
COTL1	13.1969	1.9743	0.989919	1.99441	0.0461077	0.953158		TGOLN2	29.651	-3.41652	1.28247	-2.66402	0.00772134	0.454688
ZNF335	23.4063	1.96734	0.830208	2.36969	0.017803	0.647161		LOC100506606	15.1834	-3.41445	1.67818	-2.03462	0.0418895	0.92661
PKN1	27.7355	1.9577	0.779313	2.51208	0.0120022	0.547058		LOC107986196	89.3138	-3.40932	0.911935	-3.73856	0.000185076	0.0648721
ITFG2	605.82	1.95661	0.69026	2.8346	0.0045883	0.358605		PIK3C2B	14.3638	-3.37625	1.70421	-1.98113	0.0475769	0.959913
C12orf57	18.8712	1.95285	0.855301	2.28324	0.0224164	0.72658		RPL19	159.764	-3.3717	0.930535	-3.6234	0.000290753	0.0786961
IDH2-DT	496.223	1.94982	0.565463	3.44819	0.000564363	0.112198		MDN1-AS1	100.996	-3.36283	0.903033	-3.72393	0.000196149	0.0657684
CYP20A1	25.3039	1.94657	0.80724	2.41139	0.0158916	0.621961		PTP4A2	28.4416	-3.35849	1.36057	-2.46845	0.0135698	0.586707
LOXL3	372.385	1.9456	0.613899	3.16925	0.00152832	0.210636		MED1	14.3209	-3.35473	1.6846	-1.99141	0.0464358	0.955238
GFAP	66.7136	1.94385	0.760154	2.55718	0.0105523	0.526626		MAK	14.492	-3.34484	1.68847	-1.98099	0.0475925	0.959913
SPATA1	82.3051	1.94366	0.672409	2.89059	0.00384514	0.329698		FOXQ1	42.2109	-3.33689	1.19134	-2.80096	0.00509514	0.370412
DEAF1	464.279	1.94298	0.547183	3.55087	0.000383953	0.0880153		OBI1-AS1	112.7	-3.32606	0.883907	-3.76291	0.000167949	0.0598884
LOC105372426	448.178	1.94145	0.670143	2.89706	0.00376674	0.328228		MASTL	27.7146	-3.31481	1.34986	-2.45568	0.0140619	0.593798
THOC6	119.537	1.93921	0.686873	2.82324	0.00475412	0.367015		GPRC5B	28.6741	-3.31387	1.33903	-2.47483	0.01333	0.579618
TMEM63A	46.4907	1.93684	0.671731	2.88336	0.00393452	0.331045		HIF1A-AS1	41.6856	-3.31219	1.2747	-2.59841	0.00936572	0.50699
LOC105369780	107.181	1.9352	0.918919	2.10596	0.0352082	0.868549		LOC105376224	40.6773	-3.27342	1.11132	-2.94553	0.00322406	0.305606
CTNS	197.152	1.93199	0.638304	3.02675	0.00247196	0.259498		CSPG4	40.3871	-3.26958	1.18178	-2.76666	0.00566345	0.387164
HCFC1R1	146.661	1.92972	0.679196	2.84118	0.00449467	0.358059		MBNL1-AS1	66.5059	-3.24619	1.06047	-3.06109	0.00220531	0.247217
CEMP1	393.61	1.929	0.621377	3.10439	0.0019067	0.230291		ROGDI	167.476	-3.19258	0.783228	-4.07618	4.57821e-05	0.0311665
LOC102723342	1104.89	1.92692	0.72183	2.6695	0.00759644	0.454688		LOC647070	102.877	-3.19149	0.86132	-3.70535	0.000211096	0.0697394
PSMB8-AS1	73.5756	1.92601	0.619641	3.10827	0.00188184	0.229758		FBXW7	25.2573	-3.18059	1.41265	-2.25152	0.0243529	0.753564
LOC107986486	369.874	1.92177	0.66455	2.89184	0.00382992	0.329652		ATG16L2	75.2327	-3.15555	0.933281	-3.38114	0.000721866	0.130885
IDH2	34.0121	1.92061	0.759977	2.5272	0.0114976	0.542631		MIR12136	37.2088	-3.1491	1.18967	-2.64705	0.00811982	0.466526
DPP3-DT	37.1571	1.91573	0.755489	2.53575	0.0112207	0.539015		HBP1	74.562	-3.13731	0.899905	-3.48627	0.000489811	0.10492
THAP7-AS1	51.2611	1.91418	0.697673	2.74367	0.00607569	0.396061		SMARCA4	36.705	-3.13087	1.2047	-2.59888	0.00935296	0.50699
KREMEN2	30.8024	1.89992	0.782567	2.4278	0.0151906	0.61377		MET	24.3784	-3.12546	1.28034	-2.44111	0.0146422	0.601347
KCP	20.4407	1.89371	0.938401	2.01802	0.0435892	0.936719		FAN1	122.605	-3.12016	0.905792	-3.44468	0.000571731	0.112666
RPF1	57.0813	1.88452	0.75794	2.48637	0.0129055	0.570714		TIPARP-AS1	48.691	-3.1188	1.12526	-2.77162	0.00557776	0.385552
THEM5	15.2444	1.88062	0.933791	2.01396	0.0440137	0.939375		LHX4	72.5365	-3.10285	1.03977	-2.98416	0.0028436	0.277745
GNG3	61.946	1.87619	0.647169	2.89907	0.00374276	0.328228		UBE2N	48.006	-3.09701	1.01871	-3.04014	0.00236471	0.258577
LOC728975	57.5203	1.87498	0.783467	2.39319	0.0167027	0.629906		IRAIN	23.5436	-3.06765	1.27855	-2.39933	0.0164252	0.625263
THBS3	30.6531	1.87322	0.83124	2.25353	0.0242258	0.752583		TSIX	1600.09	-3.05379	0.675961	-4.51769	6.2517e-06	0.0100317
STYXL1	63.3375	1.87236	0.763925	2.45097	0.0142471	0.59704		TICRR	23.2411	-3.05316	1.33567	-2.28588	0.0222616	0.724937
LOC112268296	124.155	1.87058	0.604569	3.09408	0.00197427	0.234666		SMARCA5-AS1	175.266	-3.04738	0.909689	-3.34991	0.000808387	0.140778
PPP1CA	87.4933	1.86777	0.614864	3.03769	0.00238397	0.258577		LOC105369373	81.4751	-3.04448	0.990196	-3.07463	0.00210764	0.242981
NR1I3	35.8533	1.86656	0.771615	2.41904	0.0155617	0.61941		VEGFA	34.4838	-3.03994	1.19174	-2.55084	0.0107463	0.527108
CYC1	28.8574	1.86191	0.766395	2.42944	0.015122	0.612102		BDNF-AS	22.4692	-2.99737	1.30047	-2.30484	0.0211755	0.716541
CHADL	62.1308	1.85569	0.723435	2.56511	0.0103144	0.525346		GOLGA3	112.509	-2.99403	0.938587	-3.18993	0.00142308	0.200049
LOC101927330	38.1972	1.85502	0.768094	2.4151	0.015731	0.619753		CDIP1	44.3339	-2.97978	1.04552	-2.85005	0.00437125	0.351972
ATP2A1	37.7273	1.84757	0.723299	2.55437	0.0106381	0.526626		LOC107984665	33.1009	-2.97487	1.10501	-2.69216	0.00709908	0.434552
LOC105375019	36.7483	1.84754	0.902651	2.04679	0.0406783	0.916588		LOC729291	43.8336	-2.9636	1.07587	-2.7546	0.00587637	0.390792
PKN3	59.3083	1.84657	0.69562	2.65456	0.00794114	0.460746		LOC107984338	474.443	-2.95949	0.752285	-3.93399	8.35461e-05	0.042656
TMEM223	432.555	1.8415	0.705164	2.61144	0.00901607	0.499375		LOC100507346	43.5981	-2.95291	1.10134	-2.6812	0.00733591	0.444304
RGP1	21.6408	1.83994	0.847006	2.17229	0.0298336	0.806513		HOXB-AS2	131.326	-2.95126	0.905402	-3.25961	0.00111566	0.16821
HMOX2	18.0619	1.83988	0.884529	2.08007	0.0375191	0.88408		FAT1	32.3657	-2.94809	1.19065	-2.47604	0.0132848	0.579502
MRPL20-AS1	175.147	1.83803	0.892433	2.05958	0.0394391	0.894047		RBP5	43.4247	-2.9473	1.08825	-2.70829	0.00676314	0.424396
RSF1	127.873	1.83637	0.58886	3.11852	0.00181764	0.229758		PPP2R3B	32.4497	-2.9437	1.10918	-2.65394	0.00795579	0.460746
LOC107986257	108.407	1.82813	0.776441	2.3545	0.0185476	0.661384		PAN3-AS1	54.0816	-2.94133	1.01908	-2.88627	0.00389832	0.331045
PRPF40B	43.2237	1.81662	0.792825	2.29132	0.021945	0.719698		LOC107985304	703.859	-2.93092	0.807625	-3.62906	0.00028446	0.0786961
DOC2A	414.784	1.81629	0.580809	3.12718	0.00176495	0.228919		RPL6	31.9697	-2.93002	1.27226	-2.30301	0.0212784	0.716541
SLC48A1	44.7284	1.81173	0.751057	2.41224	0.015855	0.621611		POLR3G	21.4413	-2.92961	1.38062	-2.12195	0.0338417	0.859044
LOC100133091	89.9897	1.80736	0.740022	2.4423	0.0145939	0.601347		IFNWP19	64.2286	-2.92306	1.05743	-2.76429	0.00570462	0.387164
CCDC85B	30.3318	1.80577	0.755422	2.39041	0.0168295	0.631795		FAM13A-AS1	53.0173	-2.90864	0.988821	-2.94152	0.00326607	0.305718
NUDT22	38.5144	1.80462	0.7448	2.42297	0.0153944	0.617444		BRAF	20.8489	-2.8889	1.37247	-2.1049	0.0353001	0.868597
C22orf15	37.5948	1.80361	0.90636	1.98995	0.0465967	0.955977		DUSP16	20.9369	-2.88002	1.29327	-2.22692	0.0259523	0.77049
SLC12A6	331.115	1.80139	0.733148	2.45707	0.0140076	0.593534		FBXL13	114.788	-2.87766	0.748357	-3.8453	0.000120403	0.051035
VPS51	25.6395	1.79787	0.834874	2.15346	0.0312825	0.830688		WDFY3-AS1	20.3263	-2.85938	1.36645	-2.09256	0.0363881	0.876161
ORAI2	58.3922	1.77833	0.651509	2.72956	0.00634195	0.405903		ANKRD11	50.5751	-2.84184	0.95165	-2.98623	0.00282442	0.277077
TOE1	58.3221	1.77762	0.712346	2.49545	0.0125799	0.564086		ZNF8-DT	20.4121	-2.83893	1.29962	-2.18444	0.0289301	0.800994
PYCARD-AS1	433.46	1.77285	0.555095	3.19377	0.00140427	0.199664		LOC105373424	20.7739	-2.82764	1.36025	-2.07877	0.0376382	0.884101
MMP24OS	166.823	1.7716	0.587275	3.01665	0.00255585	0.262179		MYC	30.0115	-2.82419	1.1097	-2.54499	0.010928	0.531333
PPP2R5D	175.179	1.76759	0.581312	3.04069	0.00236036	0.258577		RPS17	140.163	-2.81994	0.930031	-3.03209	0.00242865	0.258577
LOC107984262	30.0075	1.76539	0.753753	2.34213	0.019174	0.674024		ADNP-AS1	59.986	-2.81966	1.12219	-2.51263	0.0119836	0.547058
ETFB	33.6084	1.76438	0.808008	2.18362	0.02899	0.800994		AJM1	29.7071	-2.81191	1.16837	-2.4067	0.0160975	0.622013
LOC105371483	29.5215	1.76273	0.801576	2.19908	0.0278726	0.790565		NEPRO	59.5453	-2.81049	0.914628	-3.07282	0.00212043	0.242981
ACTR3C	116.97	1.75826	0.634055	2.77304	0.00555356	0.385064		PCID2	19.7394	-2.80756	1.31067	-2.14209	0.0321862	0.841523
SAMD14	555.156	1.7567	0.611328	2.87359	0.00405838	0.336746		BEND3P1	108.759	-2.80022	0.977515	-2.86463	0.00417493	0.339947
PKMYT1	595.365	1.75504	0.658244	2.66625	0.00767022	0.454688		KCNQ1OT1	158.826	-2.79355	0.723121	-3.86318	0.000111919	0.0492991
PPP4C	26.8156	1.74865	0.807913	2.1644	0.0304337	0.815173		VGLL4	29.9292	-2.7935	1.0934	-2.55487	0.0106227	0.526626
TUFM	31.9306	1.74663	0.865621	2.01777	0.0436149	0.936719		LOC101929918	292.694	-2.77703	0.71147	-3.90323	9.4919e-05	0.0460611
ISYNA1	98.1578	1.74508	0.797011	2.18953	0.0285582	0.800096		LOC107985873	241.853	-2.76464	0.778366	-3.55185	0.000382536	0.0880153
LOC107984340	1954.15	1.74173	0.593676	2.93381	0.00334828	0.308275		ZNF225-AS1	144.322	-2.75862	0.806987	-3.41841	0.000629876	0.117918
LOC729867	186.478	1.73647	0.65144	2.66559	0.00768527	0.454688		TBCK	57.2889	-2.75538	0.955498	-2.88371	0.00393025	0.331045
JTB	22.2096	1.73624	0.842193	2.06157	0.039249	0.894047		MESTIT1	95.5179	-2.74947	0.822711	-3.34197	0.000831871	0.142997
SNRPB	25.7791	1.73454	0.820591	2.11377	0.0345348	0.864979		RAB11FIP1P1	38.1059	-2.74778	1.01712	-2.70154	0.00690196	0.42739
TMEM179B	87.8082	1.72736	0.63837	2.70589	0.00681214	0.426281		LOC105373975	47.6881	-2.74707	0.926447	-2.96516	0.00302524	0.290436
GNA15-DT	56.614	1.72658	0.680016	2.53903	0.011116	0.535883		RPS25	142.962	-2.74532	1.00021	-2.74475	0.00605564	0.396061
SCX	327.083	1.72527	0.773717	2.22985	0.0257572	0.77049		HNRNPU	85.1417	-2.73623	0.785501	-3.48342	0.000495058	0.10492
HTRA2	447.145	1.7233	0.57417	3.00137	0.00268768	0.270757		GMDS	19.2653	-2.72816	1.37562	-1.98322	0.0473432	0.959309
PELI3	44.1225	1.72128	0.743097	2.31636	0.0205386	0.701216		LOC105378011	19.4437	-2.72507	1.38826	-1.96293	0.0496542	0.967916
NAPA-AS1	632.586	1.72081	0.579264	2.97068	0.00297137	0.286488		TCF3	27.7834	-2.72249	1.23708	-2.20073	0.0277549	0.790129
LOC107985013	49.2385	1.71818	0.716144	2.39921	0.0164306	0.625263		RGMB-AS1	37.4092	-2.72237	1.11848	-2.43399	0.0149333	0.608852
SMG5	36.2601	1.7173	0.742226	2.31371	0.0206834	0.702955		LYRM4-AS1	28.0234	-2.7199	1.11854	-2.43166	0.0150299	0.609473
SAMD11	584.353	1.71686	0.777412	2.20843	0.0272142	0.784809		DNM1L	28.2185	-2.70929	1.11769	-2.424	0.0153505	0.617444
NUCB1-AS1	714.433	1.71472	0.645561	2.65616	0.0079036	0.460746		ANKH	55.9269	-2.70897	0.874303	-3.09843	0.00194549	0.232475
DGAT1	250.505	1.7141	0.676042	2.53549	0.011229	0.539015		TPM1	18.7659	-2.69553	1.33945	-2.01241	0.0441763	0.940683
SUGP2	143.137	1.71363	0.590903	2.90001	0.00373148	0.328228		ACACA	18.3317	-2.67728	1.33547	-2.00474	0.0449908	0.948597
TK1	29.6706	1.70732	0.774088	2.20559	0.027413	0.786487		LIF-AS2	27.1221	-2.67101	1.17985	-2.26386	0.0235826	0.742978
PHAF1	38.5344	1.70484	0.707191	2.41071	0.0159214	0.622013		MIPEPP3	35.9676	-2.66487	1.16163	-2.29409	0.0217855	0.716563
ABCB9	74.5647	1.70475	0.631639	2.69893	0.00695626	0.42932		LRP1-AS	26.7642	-2.66055	1.2038	-2.21013	0.027096	0.783412
SLC5A6	234.219	1.70397	0.568528	2.99716	0.00272508	0.271795		DEK	26.6539	-2.66051	1.20101	-2.21522	0.0267451	0.781435
LOC105372245	97.122	1.70262	0.631874	2.69455	0.00704835	0.433049		LOC105370459	17.7838	-2.65525	1.3401	-1.98139	0.047548	0.959913
TMEM234	131.817	1.69554	0.590344	2.87212	0.00407723	0.336746		KIAA0895	71.5592	-2.65354	1.03833	-2.55557	0.0106014	0.526626
C11orf49	76.9391	1.68689	0.669552	2.51944	0.0117543	0.547058		LOC105376411	17.9417	-2.65082	1.32623	-1.99876	0.045634	0.949229
AKT1S1	169.069	1.68237	0.609353	2.76091	0.00576408	0.387164		PTPRK-AS1	133.974	-2.64696	0.788637	-3.35637	0.000789734	0.140675
PPIL6	194.811	1.67618	0.563609	2.97402	0.00293927	0.285847		CERNA1	71.0003	-2.6422	0.965378	-2.73696	0.00620093	0.401452
HSD17B1	446.958	1.67292	0.53296	3.13892	0.00169569	0.22277		ABCC11	44.1415	-2.6372	1.04212	-2.53062	0.0113862	0.540521
C2orf92	59.4546	1.66898	0.682714	2.44463	0.0145002	0.599556		RIC1	26.2621	-2.62992	1.19264	-2.20513	0.0274449	0.786487
SCIRT	60.1335	1.66845	0.731249	2.28164	0.0225105	0.72658		LRRC37A4P	26.1834	-2.62869	1.20359	-2.18404	0.0289593	0.800994
L3MBTL2-AS1	160.399	1.66725	0.594788	2.8031	0.00506142	0.370245		SLC22A23	26.0138	-2.61472	1.1201	-2.33437	0.0195764	0.683955
UBB	45.4495	1.66114	0.812135	2.0454	0.0408157	0.917843		FRMD4A	61.0123	-2.61011	0.860607	-3.03287	0.00242242	0.258577
NPRL3	1221.55	1.66083	0.520703	3.18958	0.00142479	0.200049		LOC105378728	78.2805	-2.608	0.813069	-3.2076	0.00133848	0.195253
CIRBP	68.7464	1.63861	0.637245	2.5714	0.0101289	0.523094		LOC101928371	77.5873	-2.59571	0.914677	-2.83784	0.004542	0.358605
RGS11	28.465	1.63854	0.777552	2.1073	0.0350914	0.868134		LOC101929162	42.6904	-2.57761	0.987807	-2.60943	0.00906945	0.499375
KLHL22	57.8194	1.63261	0.666276	2.45035	0.0142716	0.59704		LOC102723786	67.8503	-2.5734	0.9017	-2.85394	0.00431809	0.348942
MAPK8IP3	37.0194	1.63216	0.751196	2.17275	0.0297989	0.806513		FAM120AOS	255.091	-2.57114	0.821017	-3.13165	0.0017383	0.22704
ZNF687	74.285	1.63118	0.630095	2.58878	0.00963167	0.510448		NCOA3	25.3624	-2.56637	1.11858	-2.29432	0.0217721	0.716563
TATDN1	2823.5	1.63003	0.603414	2.70134	0.00690597	0.42739		GCSAM	33.5181	-2.55775	1.01726	-2.51434	0.0119254	0.547058
PTOV1-AS2	1424.01	1.62999	0.590492	2.7604	0.00577306	0.387164		CCDC183-AS1	76.043	-2.55287	0.768665	-3.32117	0.000896411	0.150283
TMEM147-AS1	286.301	1.62988	0.682626	2.38766	0.0169558	0.632064		ST7L	74.8669	-2.54378	0.868761	-2.92805	0.00341096	0.311493
TBCB	152.92	1.61852	0.703313	2.30127	0.0213761	0.716541		PAN3	41.4781	-2.54233	0.958363	-2.65278	0.0079831	0.461029
FUT2	34.0561	1.61679	0.768226	2.10457	0.0353285	0.868597		LOC105370687	225.094	-2.54163	0.723509	-3.51292	0.000443214	0.0985823
ARHGEF40	57.707	1.61578	0.711326	2.27151	0.0231161	0.734516		INO80-AS1	24.9505	-2.53455	1.10961	-2.28417	0.0223615	0.72658
SLC29A2	80.1078	1.61527	0.75687	2.13415	0.0328305	0.848529		IDI2-AS1	140.781	-2.53362	0.817627	-3.09875	0.00194339	0.232475
LOC101928525	797.203	1.61264	0.667959	2.41428	0.0157663	0.619753		DPH3P1	24.933	-2.53012	1.12934	-2.24036	0.0250675	0.758951
SMPD4	35.5858	1.60613	0.80477	1.99576	0.04596	0.953158		LOC107985139	139.744	-2.52263	0.912443	-2.7647	0.00569754	0.387164
VIPR1-AS1	39.385	1.59799	0.748067	2.13616	0.0326668	0.84546		HP09053	205.163	-2.51839	0.695643	-3.62023	0.000294347	0.0787203
LOC107985023	198.8	1.59635	0.647862	2.46403	0.0137383	0.586707		MPHOSPH8	32.6863	-2.51538	1.03286	-2.43537	0.0148766	0.607642
MEA1	936.246	1.59178	0.561898	2.83287	0.00461325	0.358605		PDE5A	32.6277	-2.51526	1.06369	-2.36465	0.0180471	0.651814
BSG	104.768	1.59081	0.585116	2.71879	0.00655213	0.41463		NUDT4	25.2321	-2.51396	1.20599	-2.08457	0.0371086	0.882971
TKFC	1013.22	1.58977	0.571682	2.78087	0.00542141	0.381436		ALG1L13P	64.7121	-2.50331	0.890709	-2.81047	0.00494686	0.370245
LOC102723566	150.055	1.58767	0.766429	2.07152	0.0383104	0.884201		ZSCAN25	64.4004	-2.49709	0.900229	-2.77384	0.00553992	0.385064
TUBGCP2	539.583	1.58653	0.570194	2.78245	0.00539503	0.381436		LOC112268140	64.0311	-2.48869	0.951087	-2.61668	0.00887905	0.498132
LOC105372707	1211.4	1.58532	0.536888	2.95279	0.00314919	0.299774		H1-0	79.7841	-2.47843	0.796095	-3.11323	0.00185051	0.229758
EMC10	63.8905	1.58333	0.659371	2.40128	0.0163378	0.624199		HEATR1	151.803	-2.47706	0.715488	-3.46205	0.000536077	0.108495
PHPT1	34.0853	1.58256	0.770299	2.05448	0.0399291	0.903331		IRF2BP2	23.762	-2.4725	1.13329	-2.1817	0.0291318	0.801891
AMMECR1L	91.1426	1.5776	0.593878	2.65643	0.00789721	0.460746		NR2C2	142.896	-2.47026	0.748034	-3.30234	0.000958816	0.156555
PCNX3	53.7987	1.57401	0.660613	2.38266	0.0171883	0.632064		PMS2P1	70.965	-2.46422	0.952614	-2.58679	0.00968732	0.512061
LRRC14	60.0229	1.57048	0.650542	2.41411	0.0157735	0.619753		GTF2A2	86.9658	-2.46356	0.816105	-3.01868	0.0025388	0.261625
SPOUT1	403.384	1.5677	0.532868	2.942	0.00326102	0.305718		KMO	55.1636	-2.44506	0.848688	-2.88098	0.00396437	0.332312
SSR4	285.631	1.55676	0.600258	2.59349	0.00950075	0.509289		TM2D2	92.8985	-2.43471	0.932123	-2.612	0.00900135	0.499375
EFHD2	31.2969	1.55654	0.786786	1.97835	0.0478894	0.960566		NTSR1	192.917	-2.4254	0.698076	-3.47441	0.000511973	0.106179
FAM228B	79.4662	1.5465	0.642451	2.40719	0.0160758	0.622013		KRTAP5-1	45.8471	-2.42208	0.982444	-2.46536	0.0136877	0.586707
RAD23A	50.1908	1.54021	0.686651	2.24307	0.0248922	0.758756		UBTF	30.4361	-2.42156	1.05503	-2.29525	0.0217189	0.716563
LTBP3	174.416	1.53368	0.627483	2.44417	0.0145185	0.599556		LOC102723904	75.8859	-2.40564	0.904533	-2.65954	0.00782478	0.458965
SZT2	539.617	1.53292	0.598202	2.56255	0.0103907	0.525739		LOC105373835	37.4276	-2.3917	1.01025	-2.36743	0.0179119	0.649018
GRIN3B	170.215	1.52302	0.65794	2.31483	0.0206222	0.702955		NAPEPLD	22.6367	-2.39085	1.20742	-1.98014	0.0476879	0.959913
LOC105372989	33.9397	1.52002	0.724149	2.09904	0.0358135	0.872962		EEF1D	248.39	-2.3879	0.768085	-3.1089	0.00187787	0.229758
CISD3	1149.73	1.51842	0.584288	2.59875	0.00935634	0.50699		CHD4	30.0421	-2.38083	1.0142	-2.3475	0.0188999	0.670754
SPINT1-AS1	675.769	1.51645	0.527466	2.87497	0.0040407	0.336746		RPL32	51.951	-2.38009	1.00306	-2.37283	0.0176524	0.643769
RAB11B-AS1	291.938	1.51594	0.615713	2.46209	0.0138131	0.586707		ZBTB11-AS1	59.4698	-2.37726	0.960671	-2.47459	0.0133391	0.579618
PKM	160.478	1.51259	0.700671	2.15877	0.0308682	0.823012		GET4	134.2	-2.37496	0.897774	-2.64538	0.0081598	0.467628
SRMS	84.443	1.50591	0.642405	2.34417	0.0190696	0.673857		LRRN4	30.2002	-2.36955	1.0299	-2.30076	0.0214053	0.716541
PGLS-DT	499.312	1.49913	0.656462	2.28366	0.0223918	0.72658		SPATA9	58.7512	-2.35848	0.881081	-2.6768	0.00743286	0.447665
LOC107986985	195.703	1.49904	0.58927	2.54388	0.0109628	0.531333		DXO	43.8467	-2.35463	1.08454	-2.17108	0.0299248	0.808006
WDR83OS	102.798	1.49889	0.635154	2.35988	0.018281	0.654996		LOC101929240	80.7328	-2.35442	0.852935	-2.76038	0.00577342	0.387164
RHOC	81.6138	1.49863	0.630452	2.37708	0.0174504	0.640559		PTBP1	21.7184	-2.35348	1.199	-1.96287	0.0496611	0.967916
KRT8	21587.1	1.49607	0.633746	2.36068	0.0182414	0.654621		JUND	36.4576	-2.35062	0.953346	-2.46566	0.0136763	0.586707
KIAA0895L	36.8888	1.49473	0.721641	2.0713	0.0383312	0.884201		LOC100652999	109.246	-2.33953	0.774275	-3.02158	0.00251458	0.261528
RANBP1	643.223	1.49131	0.521874	2.85761	0.00426845	0.346176		COX20	50.7201	-2.33285	0.854645	-2.72961	0.00634089	0.405903
MOV10	3797.26	1.49085	0.559139	2.66633	0.00766839	0.454688		LOC112268052	566.298	-2.33119	0.700775	-3.32659	0.000879164	0.148499
ENTPD5	185.295	1.49077	0.578329	2.57772	0.00994551	0.51794		RAD21	28.6277	-2.31394	1.04591	-2.21237	0.0269409	0.781435
CFAP157	310.991	1.48331	0.645789	2.2969	0.0216247	0.716563		EHBP1-AS1	128.511	-2.30838	0.729445	-3.16456	0.00155316	0.212754
KLC2-AS1	410.705	1.47189	0.552601	2.66357	0.00773161	0.454688		RSL1D1	20.9658	-2.29267	1.16429	-1.96916	0.0489346	0.967916
GADD45GIP1	582.152	1.46881	0.699868	2.0987	0.0358435	0.872962		TUBB1	21.0202	-2.28678	1.1391	-2.00753	0.0446935	0.948102
FOXP3	50.1315	1.46647	0.719035	2.03949	0.041401	0.925097		ALPK3	27.6951	-2.28481	1.15203	-1.9833	0.0473344	0.959309
LOC107985034	1227.34	1.4632	0.619082	2.36349	0.0181036	0.652457		FAM184B	55.8115	-2.26994	0.806525	-2.81447	0.00488576	0.369094
AGBL5	377.877	1.46065	0.611164	2.38995	0.0168507	0.631795		ALX3	69.5601	-2.26617	0.771595	-2.93699	0.0033141	0.307574
LOC100130283	501.658	1.46039	0.537716	2.71591	0.00660932	0.415906		FLJ12825	69.6882	-2.2648	0.75591	-2.99613	0.00273429	0.271795
RELL2	142.841	1.45919	0.56696	2.57371	0.0100614	0.520805		LOC105370062	34.7932	-2.26195	0.967019	-2.3391	0.0193304	0.676412
PLEKHA7	139.145	1.45909	0.611903	2.38452	0.0171015	0.632064		HERPUD2	27.4373	-2.26014	1.06914	-2.11398	0.0345172	0.864979
COL4A2-AS1	56.8395	1.44785	0.681981	2.12301	0.0337534	0.859044		NKAPD1	76.1924	-2.25375	0.735296	-3.06509	0.00217605	0.246894
LOC105372480	203.429	1.44763	0.582189	2.48652	0.0128998	0.570714		DPY19L1P1	48.3365	-2.25213	0.873862	-2.57722	0.00995995	0.51794
RBM38-AS1	248.199	1.44243	0.651732	2.21323	0.0268817	0.781435		NSUN5P2	34.3895	-2.24561	0.947912	-2.369	0.017836	0.647313
LOC107987250	291.343	1.44168	0.586879	2.45651	0.0140292	0.593534		WAC	34.1939	-2.24195	0.945389	-2.37146	0.0177179	0.645111
MLX	148.641	1.43857	0.589253	2.44135	0.0146324	0.601347		LOC107984190	40.8717	-2.24135	0.975701	-2.29717	0.021609	0.716563
TMPO	70.964	1.43112	0.613773	2.33168	0.0197177	0.684368		LOC105375683	33.7489	-2.23902	1.10196	-2.03186	0.0421675	0.92661
CA14	881.977	1.43013	0.671415	2.13002	0.0331699	0.852348		NFE2L3P2	27.0997	-2.22526	1.01134	-2.2003	0.0277855	0.790129
CYREN	105.879	1.42584	0.59259	2.40612	0.0161229	0.622013		NACA	40.28	-2.22275	0.922301	-2.41001	0.0159522	0.622013
IRAK1	64.2656	1.41996	0.720133	1.9718	0.0486324	0.966838		CMC1	60.7621	-2.22002	0.856438	-2.59216	0.00953761	0.509289
ALDH16A1	54.4447	1.40367	0.643798	2.1803	0.0292353	0.801919		HEXB	303.345	-2.21973	0.691296	-3.21097	0.00132289	0.195002
SLC5A10	316.427	1.40211	0.647096	2.16677	0.0302525	0.813984		TNRC18	53.0405	-2.20693	0.889865	-2.48007	0.0131355	0.576202
GPAT2	51.2563	1.39791	0.666423	2.09763	0.0359375	0.872962		BMP8A	26.5174	-2.20436	1.04248	-2.11454	0.0344688	0.864979
CACNA2D2	43.4989	1.39466	0.692289	2.01457	0.0439502	0.939375		CCDC18	66.1699	-2.20183	0.849072	-2.59322	0.00950832	0.509289
LSMEM2	296.267	1.3908	0.694493	2.00262	0.0452186	0.949229		KMT2D	32.7165	-2.19336	1.02626	-2.13723	0.0325793	0.84417
HAS3	878.594	1.38956	0.595964	2.33162	0.0197206	0.684368		ADCY7	33.2607	-2.19169	0.935985	-2.34158	0.0192021	0.674024
TSPAN31	2364.03	1.38829	0.551325	2.5181	0.0117989	0.547058		SERBP1	33.2928	-2.18033	1.04011	-2.09624	0.0360609	0.872962
YDJC	41.9585	1.38805	0.689731	2.01245	0.0441729	0.940683		LOC107985555	85.0727	-2.17917	0.773974	-2.81556	0.00486923	0.369094
SLC9A3R1-AS1	1378.16	1.38031	0.540892	2.55192	0.010713	0.526626		OSBP2	26.2005	-2.17796	1.01863	-2.13812	0.0325074	0.843278
ZCWPW1	495.668	1.38013	0.538364	2.56357	0.0103601	0.525372		LOC105378726	109.965	-2.15869	0.713179	-3.02685	0.00247115	0.259498
LOC101928953	724.163	1.36756	0.548662	2.49253	0.0126837	0.566479		SEC61A1	25.7436	-2.15841	1.03419	-2.08707	0.0368821	0.882763
RFXANK	109.479	1.36725	0.653258	2.09297	0.0363521	0.876161		MAGOH-DT	26.0538	-2.14677	1.06599	-2.01387	0.0440229	0.939375
SNAP47	785.437	1.36164	0.534634	2.54686	0.0108698	0.530847		C2	70.5486	-2.14669	0.780261	-2.75124	0.005937	0.393436
ZNF740	102.833	1.36065	0.617494	2.2035	0.0275592	0.788685		RPL27A	166.546	-2.1453	0.884238	-2.42616	0.0152597	0.615457
LOC102724438	217.958	1.34426	0.579869	2.31821	0.020438	0.699597		LOC101928864	56.9753	-2.13062	0.818351	-2.60355	0.0092263	0.503079
LOC105376286	276.765	1.33874	0.596733	2.24344	0.0248683	0.758756		RPS8	75.8655	-2.12971	0.803981	-2.64895	0.00807419	0.465094
BRICD5	152.006	1.33141	0.609003	2.18621	0.0288005	0.800746		EIF3H	43.9882	-2.12549	0.935378	-2.27233	0.0230667	0.734516
EEF2KMT	321.626	1.32433	0.6708	1.97426	0.0483521	0.965537		LOC107985946	125.961	-2.11968	0.729453	-2.90585	0.00366254	0.326504
VPS9D1-AS1	84.9183	1.31891	0.636771	2.07125	0.0383359	0.884201		AGK	903.165	-2.11847	0.590488	-3.58765	0.000333666	0.0806
BAIAP2-DT	128.43	1.31174	0.573	2.28924	0.0220652	0.722589		ZSCAN16-AS1	43.2051	-2.09738	0.941949	-2.22664	0.0259711	0.77049
DHX8	329.04	1.30998	0.544402	2.40627	0.0161165	0.622013		C1orf112	99.7787	-2.09584	0.68487	-3.0602	0.00221191	0.247217
ARMC5	74.076	1.29829	0.637391	2.03688	0.0416623	0.925761		TAF5	55.3724	-2.08912	0.91021	-2.29521	0.0217213	0.716563
CTSA	117.408	1.29677	0.592089	2.19016	0.0285127	0.800096		GNB3	30.9271	-2.08688	1.02624	-2.03352	0.0419998	0.92661
LOC112268170	3660.25	1.29105	0.622943	2.07249	0.0382194	0.884201		ZRANB2-AS1	147.671	-2.08319	0.867363	-2.40175	0.0163168	0.624199
GJD3	187.809	1.28587	0.578823	2.22152	0.0263154	0.775822		SMUG1-AS1	104.099	-2.07715	0.751691	-2.76331	0.00572187	0.387164
GPANK1	365.372	1.28296	0.599444	2.14026	0.0323342	0.841523		SPDYA	37.4317	-2.07681	0.955374	-2.17382	0.0297187	0.806318
DGUOK-AS1	353.695	1.28218	0.645176	1.98734	0.0468847	0.959309		NCOR2	54.6859	-2.07477	0.914276	-2.26931	0.0232497	0.735639
LBX2	97.1112	1.28169	0.610425	2.09968	0.0357573	0.872962		LOC107984219	189.484	-2.07029	0.768417	-2.69423	0.00705524	0.433049
BANF1	63.9888	1.2766	0.632836	2.01726	0.0436679	0.936919		CRB2	43.5604	-2.0677	1.00378	-2.05992	0.0394061	0.894047
WRAP53	120.765	1.26051	0.622632	2.02448	0.0429208	0.931106		TTC36-AS1	96.7466	-2.0554	0.751576	-2.73479	0.00624201	0.401796
KCNG2	362.805	1.24433	0.542865	2.29216	0.0218966	0.719162		NCOR1	24.0357	-2.05445	1.04805	-1.96027	0.0499644	0.968464
CHAF1A	214.009	1.23632	0.588323	2.10143	0.0356036	0.871279		TPPP	29.8119	-2.04545	1.00722	-2.03077	0.042278	0.92661
FAM131B	350.05	1.23579	0.561575	2.20058	0.0277661	0.790129		SPG11	48.0054	-2.03925	0.842139	-2.42151	0.0154561	0.617831
LBHD1	1414.03	1.23354	0.53596	2.30155	0.0213603	0.716541		IGLON5	77.6186	-2.03871	0.74182	-2.74825	0.00599136	0.394468
LINC00847	160.712	1.23088	0.569087	2.1629	0.0305487	0.816995		ZNF891	94.7033	-2.02389	0.783718	-2.58242	0.00981099	0.514931
UXT-AS1	563.244	1.2267	0.54634	2.24531	0.0247481	0.758481		STEAP3-AS1	53.4101	-2.02292	0.821648	-2.46202	0.0138156	0.586707
ARHGAP45	286.116	1.22361	0.57807	2.11672	0.0342834	0.863427		APP	64.8911	-2.02214	0.792037	-2.55309	0.0106772	0.526626
B3GNT4	732.458	1.22301	0.583072	2.09752	0.0359472	0.872962		AHSA2P	207.301	-2.02171	0.642792	-3.1452	0.00165971	0.220774
TNFRSF14-AS1	137.506	1.22247	0.576533	2.12038	0.033974	0.860062		SLC19A1	195.131	-2.01858	0.611724	-3.29981	0.00096749	0.156555
ZSWIM8-AS1	233.551	1.21468	0.545695	2.22593	0.0260187	0.77049		BCL10-AS1	41.0127	-2.01472	0.977719	-2.06063	0.0393383	0.894047
CARM1	503.727	1.18512	0.597399	1.98379	0.0472791	0.959309		LUC7L3	29.2479	-2.01385	0.98795	-2.03841	0.0415089	0.925097
TMEM120B	758.166	1.18228	0.55765	2.12011	0.0339967	0.860062		USP34	46.726	-2.00984	0.922657	-2.17831	0.0293828	0.803022
ABHD1	312.618	1.16334	0.559199	2.08038	0.037491	0.88408		GASK1B-AS1	81.687	-2.00506	0.991524	-2.0222	0.0431554	0.931302
RSPH9	833.937	1.15767	0.532528	2.17391	0.0297117	0.806318		SCD	41.5544	-2.00366	0.957818	-2.0919	0.0364476	0.876655
LNX2	102.205	1.1533	0.587906	1.9617	0.049797	0.967916		MRPS25	262.817	-1.99987	0.627361	-3.18775	0.00143383	0.200068
KLC4-AS1	304.803	1.13809	0.558254	2.03866	0.0414839	0.925097		HOXB-AS1	297.212	-1.9975	0.689852	-2.89555	0.00378498	0.3283
HPCA	252.082	1.1322	0.57573	1.96654	0.0492366	0.967916		LOC100131626	34.6438	-1.98978	0.970219	-2.05086	0.0402809	0.908544
FCHSD1	289.516	1.11818	0.536267	2.08512	0.037058	0.882971		SVIL-AS1	75.307	-1.98766	0.760329	-2.61421	0.00894344	0.499375
AP4M1	548.532	1.08849	0.545759	1.99444	0.0461035	0.953158		EIF4G2	40.2551	-1.98747	0.908413	-2.18785	0.0286808	0.800096
LOC105373095	510.204	1.08167	0.534199	2.02485	0.0428827	0.931106		ZNF814	156.332	-1.98115	0.65295	-3.03415	0.00241215	0.258577
DLG4	469.346	1.07315	0.53907	1.99074	0.0465089	0.955238		LOC105378519	40.1147	-1.97961	0.94068	-2.10445	0.0353393	0.868597
FAM166A	2019.66	1.06879	0.513369	2.08192	0.0373495	0.88408		KBTBD3	57.1241	-1.97385	0.87763	-2.24907	0.024508	0.754208
SPINT1	337.76	1.06183	0.536241	1.98014	0.0476875	0.959913		C6orf120	137.621	-1.97302	0.677538	-2.91205	0.00359067	0.322657
JMJD8	1862.05	1.04838	0.525691	1.99429	0.0461199	0.953158		NFATC3	269.462	-1.96962	0.601182	-3.27625	0.00105197	0.162983
								RBIS	57.7361	-1.96852	0.789399	-2.49369	0.0126422	0.565753
								LOC112268186	45.3547	-1.96558	0.968393	-2.02973	0.0423836	0.927194
								SUZ12P1	34.216	-1.96502	0.923682	-2.12738	0.0333888	0.856255
								RCC2	33.7378	-1.95846	0.947876	-2.06615	0.0388139	0.8894
								LOC105377945	192.92	-1.95518	0.657975	-2.97152	0.00296331	0.286488
								C11orf42	89.8765	-1.93905	0.711665	-2.72467	0.00643657	0.408467
								MARVELD3	38.8656	-1.93904	0.98569	-1.96719	0.0491611	0.967916
								HS3ST1	106.225	-1.9382	0.801828	-2.41722	0.0156394	0.619753
								ALG12	33.2381	-1.93261	0.960967	-2.01111	0.044314	0.942722
								EDRF1-AS1	27.7414	-1.92981	0.984157	-1.96088	0.049893	0.967916
								SRGAP3	27.6876	-1.92556	0.961396	-2.00288	0.04519	0.949229
								ZNF584	71.6218	-1.91146	0.73747	-2.59192	0.00954421	0.509289
								EPB41L4A	77.584	-1.91115	0.747568	-2.55648	0.0105736	0.526626
								TTC7A	38.2075	-1.91094	0.973406	-1.96315	0.0496285	0.967916
								EIF2S2	27.5049	-1.90962	0.958217	-1.99289	0.0462735	0.953744
								JAM3	33.2545	-1.90355	0.958912	-1.98511	0.0471322	0.959309
								PIGCP1	38.6435	-1.89773	0.915633	-2.07259	0.0382104	0.884201
								LONP2	282.53	-1.88966	0.695643	-2.71641	0.00659933	0.415906
								LOC105372579	38.1076	-1.88684	0.881286	-2.14101	0.0322733	0.841523
								LOC105378443	96.5491	-1.86792	0.680903	-2.74331	0.0060824	0.396061
								GRIP2	1196.47	-1.86668	0.616221	-3.02924	0.00245168	0.259498
								EFHB	58.3894	-1.86326	0.931255	-2.0008	0.0454135	0.949229
								SIK2	42.5129	-1.85431	0.85579	-2.16679	0.0302512	0.813984
								EXOSC10-AS1	42.0885	-1.8397	0.842675	-2.18317	0.0290233	0.800994
								LYPD1	131.519	-1.83278	0.649082	-2.82365	0.00474802	0.367015
								IGL	94.8524	-1.83058	0.701304	-2.61025	0.00904761	0.499375
								DUSP28	109.309	-1.82767	0.805973	-2.26766	0.0233501	0.737777
								PITPNA	87.9957	-1.81912	0.769804	-2.3631	0.018123	0.652457
								KIF23-AS1	264.359	-1.81688	0.67208	-2.70337	0.00686398	0.42739
								LOC107985803	692.456	-1.81052	0.602446	-3.00528	0.00265339	0.268506
								ZNF45-AS1	40.7219	-1.80228	0.873332	-2.06368	0.0390482	0.892697
								LOC112268055	82.7169	-1.80169	0.711443	-2.53245	0.011327	0.540521
								RPL14	61.2556	-1.80167	0.789561	-2.28186	0.0224978	0.72658
								PCGF3	87.3284	-1.79775	0.674736	-2.66437	0.00771318	0.454688
								DSG2-AS1	60.9799	-1.79261	0.81966	-2.18701	0.0287415	0.800096
								AHNAK	66.0169	-1.78894	0.793274	-2.25513	0.0241252	0.751845
								EFCAB14-AS1	50.6286	-1.78763	0.876631	-2.0392	0.0414297	0.925097
								MZF1-AS1	284.082	-1.78419	0.707198	-2.5229	0.0116391	0.54587
								LGALS8	213.682	-1.7818	0.643476	-2.76903	0.0056224	0.387164
								LOC112268166	96	-1.77612	0.678186	-2.61893	0.00882066	0.497304
								RNF213	55.4038	-1.77389	0.780676	-2.27224	0.0230718	0.734516
								TMPO-AS1	402.337	-1.76986	0.739302	-2.39396	0.0166674	0.629906
								COPB2	109.758	-1.75443	0.66648	-2.63238	0.00847882	0.481002
								ZNF3	124.147	-1.75335	0.704107	-2.49017	0.0127682	0.568706
								PMS1	39.4337	-1.75121	0.87285	-2.00632	0.0448225	0.948597
								LOC101927741	556.457	-1.74996	0.579067	-3.02203	0.00251085	0.261528
								CENPL	34.4393	-1.73828	0.869656	-1.99881	0.0456292	0.949229
								AMN	300.697	-1.7381	0.612711	-2.83673	0.00455776	0.358605
								LINC02381	68.5655	-1.73575	0.791144	-2.19398	0.0282367	0.795906
								GTF3A	78.688	-1.73082	0.71175	-2.43178	0.0150247	0.609473
								ARHGEF17-AS1	112.195	-1.72715	0.847786	-2.03724	0.0416256	0.925761
								NEPRO-AS1	58.0107	-1.71754	0.805865	-2.1313	0.0330643	0.851822
								TRMT10B	48.0569	-1.69466	0.818108	-2.07143	0.0383182	0.884201
								SSPN	229.807	-1.6944	0.691126	-2.45165	0.0142204	0.59704
								C10orf95	81.2535	-1.69391	0.687762	-2.46293	0.0137809	0.586707
								RPL23	76.227	-1.69038	0.797913	-2.1185	0.0341325	0.861558
								PRKAR1B	52.1894	-1.67688	0.761868	-2.20101	0.027735	0.790129
								YEATS2-AS1	66.113	-1.6666	0.751943	-2.2164	0.0266642	0.781435
								RBM4B	56.356	-1.66054	0.750494	-2.2126	0.0269251	0.781435
								STARD7-AS1	229.211	-1.6586	0.65979	-2.51383	0.0119428	0.547058
								SRSF4	41.6956	-1.6507	0.819589	-2.01406	0.0440034	0.939375
								SUN2	195.242	-1.6494	0.765779	-2.15388	0.0312493	0.830688
								GABPB1-AS1	223.374	-1.64827	0.584936	-2.81787	0.00483441	0.369094
								CNNM2	641.251	-1.64576	0.589968	-2.78958	0.00527767	0.378795
								HNRNPAB	64.2951	-1.63605	0.751773	-2.17625	0.0295363	0.805258
								ALG1L6P	152.275	-1.63435	0.618602	-2.642	0.00824177	0.470276
								MGME1	128.766	-1.63229	0.648627	-2.51652	0.0118519	0.547058
								COMMD5	63.7609	-1.62102	0.768825	-2.10844	0.0349926	0.867679
								FANCA	319.964	-1.61982	0.587049	-2.75925	0.00579339	0.387347
								MXRA8	72.684	-1.61877	0.752533	-2.1511	0.0314687	0.832821
								LOC105371414	72.8898	-1.61763	0.752028	-2.15103	0.0314741	0.832821
								PGM3	45.4793	-1.61448	0.791331	-2.04021	0.0413295	0.925097
								SLC7A6OS	541.475	-1.61271	0.577744	-2.79139	0.00524818	0.377886
								ACBD3-AS1	90.5461	-1.61114	0.722972	-2.22849	0.0258477	0.77049
								LOC105374114	308.241	-1.60802	0.614108	-2.61847	0.00883259	0.497304
								VCL	49.998	-1.60148	0.771186	-2.07665	0.0378338	0.884201
								LOC107984347	319.021	-1.5951	0.757086	-2.1069	0.0351264	0.868134
								RBM15B	45.2152	-1.58767	0.809609	-1.96104	0.0498745	0.967916
								NUMA1	128.943	-1.58334	0.751505	-2.10689	0.0351273	0.868134
								MSTO2P	62.6731	-1.58315	0.744901	-2.12532	0.0335601	0.858687
								ZRANB1	53.4364	-1.58307	0.803665	-1.96982	0.0488594	0.967916
								HOXB-AS3	774.579	-1.57897	0.62733	-2.51698	0.0118367	0.547058
								CRYBG3	98.2687	-1.57742	0.715196	-2.20558	0.0274137	0.786487
								RABEP1	93.5654	-1.57433	0.698747	-2.25308	0.0242542	0.752583
								C2orf76	677.827	-1.57159	0.606834	-2.58982	0.00960257	0.510448
								GTF2I-AS1	420.881	-1.57095	0.596098	-2.63538	0.00840423	0.477977
								LOC101929185	181.644	-1.5682	0.600595	-2.61108	0.00902558	0.499375
								SMIM15-AS1	127.483	-1.56453	0.75586	-2.06986	0.0384653	0.884972
								NCL	61.9431	-1.56319	0.767236	-2.03743	0.041607	0.925761
								YBX1	92.0802	-1.55735	0.683493	-2.27851	0.0226962	0.729429
								LOC102724146	279.017	-1.54359	0.575977	-2.67995	0.0073634	0.444674
								CFAP126	78.7539	-1.54343	0.778446	-1.98271	0.0473996	0.959309
								TMEM140	541.111	-1.53571	0.690296	-2.22471	0.0261005	0.770495
								CA4	56.5812	-1.53012	0.770794	-1.98512	0.0471316	0.959309
								RFFL	86.8206	-1.52701	0.738613	-2.06741	0.0386958	0.887948
								ST3GAL1	77.0297	-1.5258	0.718458	-2.12371	0.0336943	0.859044
								LOC107984247	232.015	-1.51845	0.620208	-2.44829	0.0143534	0.598026
								LOC105371792	76.9137	-1.51575	0.730222	-2.07574	0.0379177	0.884201
								NUP88	73.0445	-1.51509	0.726961	-2.08414	0.037147	0.882971
								C4orf51	128.63	-1.51187	0.668368	-2.26203	0.0236953	0.743862
								WASHC5-AS1	124.03	-1.50828	0.672991	-2.24116	0.0250156	0.758951
								MYH9	97.2799	-1.50723	0.753344	-2.00073	0.045422	0.949229
								EEF1A1	165.015	-1.50005	0.697678	-2.15006	0.0315508	0.833868
								PMPCB	63.0014	-1.48921	0.734402	-2.02778	0.0425825	0.928753
								KLF3-AS1	82.4287	-1.46216	0.706074	-2.07083	0.0383751	0.884201
								HSPD1	91.3733	-1.45919	0.693858	-2.10301	0.0354648	0.869779
								LOC112268155	2945.34	-1.45593	0.563957	-2.58164	0.00983331	0.514931
								MTIF3	152.265	-1.45466	0.623834	-2.33181	0.0197107	0.684368
								LOC105371049	81.9168	-1.45278	0.739669	-1.9641	0.0495184	0.967916
								LOC105378721	172.516	-1.4505	0.599714	-2.41865	0.0155783	0.61941
								SETD6	788.096	-1.45003	0.558968	-2.59412	0.00948324	0.509289
								LOC100129148	471.071	-1.44737	0.554317	-2.61109	0.00902529	0.499375
								CICP14	167.146	-1.44198	0.618697	-2.33067	0.019771	0.684368
								PIAS1	407.861	-1.44135	0.580168	-2.48437	0.0129782	0.571948
								ZNF407	65.1007	-1.43899	0.733282	-1.9624	0.0497161	0.967916
								RAD21-AS1	158.733	-1.43863	0.613883	-2.34349	0.0191043	0.673857
								LOC105373581	94.3873	-1.43829	0.724577	-1.985	0.0471442	0.959309
								SLC25A29	396.932	-1.43029	0.599964	-2.38397	0.0171271	0.632064
								MFSD11	1354.07	-1.42668	0.535204	-2.66568	0.00768332	0.454688
								NCBP2-AS1	92.423	-1.42172	0.664407	-2.13984	0.032368	0.841523
								PKP4-AS1	208.631	-1.41799	0.672048	-2.10995	0.034863	0.866368
								GAS5-AS1	231.573	-1.40964	0.599466	-2.35149	0.0186985	0.665707
								MYLK4	427.443	-1.40919	0.605513	-2.32727	0.0199509	0.686365
								RPL4	171.411	-1.40844	0.672572	-2.0941	0.0362507	0.874728
								RPL3	147.119	-1.40264	0.65489	-2.14179	0.0322103	0.841523
								NDUFAF7	142.302	-1.39054	0.622321	-2.23444	0.0254544	0.765507
								HDLBP	133.388	-1.38309	0.609405	-2.26958	0.0232334	0.735639
								PIWIL4-AS1	375.606	-1.37648	0.611504	-2.25098	0.0243871	0.753583
								SH3GL1P3	78.2887	-1.37547	0.6646	-2.06963	0.0384873	0.884972
								LOC100289511	244.099	-1.36244	0.60804	-2.24071	0.0250449	0.758951
								SNED1	142.448	-1.35233	0.651791	-2.07479	0.038006	0.884201
								USP3-AS1	168.95	-1.34176	0.624922	-2.14708	0.031787	0.837156
								TBCE	210.295	-1.33998	0.625842	-2.14108	0.0322677	0.841523
								PPP3CB-AS1	120.298	-1.31219	0.648134	-2.02457	0.0429112	0.931106
								SDR39U1	427.047	-1.30668	0.574523	-2.27437	0.022944	0.733195
								MESD	136.405	-1.27732	0.612827	-2.08432	0.0371315	0.882971
								RRBP1	150.164	-1.27531	0.639934	-1.99287	0.0462756	0.953744
								PRMT7	201.765	-1.27369	0.610819	-2.08522	0.0370491	0.882971
								EIF4B	208.153	-1.26167	0.588072	-2.14543	0.0319181	0.839487
								STK24	356.031	-1.23935	0.55956	-2.21486	0.0267697	0.781435
								AP1G2	146.389	-1.23252	0.624163	-1.97468	0.0483041	0.965437
								MTIF2	1354.66	-1.22734	0.563131	-2.17949	0.0292952	0.802581
								COX11	217.666	-1.22673	0.584854	-2.0975	0.0359495	0.872962

## Sheet: Table S7
Supplementary Table S7. DEGs in HT29 Control vs HT29 Cisplatin 300M
UpregulatedGenes	baseMean	log2FoldChange	lfcSE	stat	pvalue	padj		DownregulatedGenes	baseMean	log2FoldChange	lfcSE	stat	pvalue	padj
RNU2-13P	16.2461	9.24342	1.43932	6.4221	1.34409e-10	3.83924e-07		LOC107985873	200.324	-8.87703	2.17101	-4.08889	4.33451e-05	0.00683088
TRV-AAC1-1	12.7648	8.8955	1.50197	5.92255	3.16987e-09	4.52717e-06		ZNF225-AS1	119.496	-8.13363	2.16951	-3.74906	0.0001775	0.019223
TEX54	79.2241	8.36463	0.89013	9.39709	5.6094e-21	1.2818e-16		RRBP1	116.767	-8.10021	2.13342	-3.79681	0.000146568	0.0167461
MIR23AHG	5.80219	7.75799	1.81979	4.26312	2.01595e-05	0.00383887		NUMA1	102.258	-7.91065	2.16629	-3.6517	0.000260513	0.0251181
SEC22B4P	5.80219	7.75799	1.81979	4.26312	2.01595e-05	0.00383887		OBI1-AS1	94.4033	-7.79403	2.17195	-3.58849	0.000332593	0.0298278
RNU5E-4P	5.22197	7.60598	1.87893	4.04804	5.16483e-05	0.007816		LOC729867	87.084	-7.67814	2.15361	-3.56524	0.00036352	0.0321969
LINC01587	4.64175	7.43606	1.95065	3.81209	0.000137794	0.0159835		MDN1-AS1	84.6535	-7.63811	2.17156	-3.51733	0.000435915	0.0364875
LOC105370076	4.64175	7.43606	1.95065	3.81209	0.000137794	0.0159835		LOC105372602	77.1209	-7.50178	2.15147	-3.48682	0.000488793	0.03982
LOC112268274	11.2723	7.28016	1.4512	5.01666	5.25786e-07	0.000261018		RNF213-AS1	72.9946	-7.42465	2.16849	-3.42388	0.00061734	0.0470228
SENP3-EIF4A1	4.06153	7.24341	2.03956	3.55145	0.000383114	0.0331611		ACBD3-AS1	71.7815	-7.39982	2.14901	-3.44336	0.000574532	0.0441366
TMED2-DT	4.06153	7.24341	2.03956	3.55145	0.000383114	0.0331611		GTF2A2	71.349	-7.38958	2.16219	-3.41763	0.000631685	0.0477968
HCG15	6.53569	7.17415	1.7254	4.15796	3.21102e-05	0.00535583		LOC105369373	67.8939	-7.31976	2.21143	-3.30996	0.000933096	0.060747
SAP30-DT	6.49571	7.17415	1.72786	4.15204	3.29528e-05	0.00545656		LOC105369149	67.6631	-7.31379	2.16057	-3.38512	0.000711466	0.0521685
LOC105373190	6.076	7.03665	1.77196	3.9711	7.15412e-05	0.0100913		RFFL	68.1521	-7.30848	2.15216	-3.39589	0.00068407	0.0507522
GYG1P1	3.48131	7.02102	2.15293	3.26114	0.00110964	0.0677975		GASK1B-AS1	66.1077	-7.28233	2.24853	-3.23871	0.00120071	0.0720145
H2AC19	3.48131	7.02102	2.15293	3.26114	0.00110964	0.0677975		LOC105371049	64.345	-7.24086	2.15525	-3.35964	0.000780432	0.0543709
LOC107986575	3.48131	7.02102	2.15293	3.26114	0.00110964	0.0677975		LOC101928371	63.9189	-7.23255	2.19327	-3.29761	0.000975112	0.0625907
MRPL53P1	3.48131	7.02102	2.15293	3.26114	0.00110964	0.0677975		ATG16L2	62.7858	-7.20744	2.17377	-3.31564	0.000914327	0.0600382
LOC102724467	5.49578	6.88464	1.82327	3.77598	0.000159382	0.0175943		SVIL-AS1	60.6565	-7.1527	2.14832	-3.32944	0.000870204	0.0586579
ZNF620	5.49578	6.88464	1.82327	3.77598	0.000159382	0.0175943		MIR6126	60.801	-7.14719	2.14511	-3.33186	0.000862682	0.058496
LOC105374852	5.31679	6.88464	1.82638	3.76955	0.000163543	0.017881		CERNA1	58.681	-7.1117	2.21024	-3.21762	0.0012926	0.07555
CYTOR	2.90109	6.75798	2.30318	2.93419	0.00334418	0.135429		PCED1B	58.2507	-7.10012	2.2575	-3.14513	0.00166013	0.089895
DPYSL5	2.90109	6.75798	2.30318	2.93419	0.00334418	0.135429		PAXIP1-AS2	56.3438	-7.04344	2.1437	-3.28564	0.00101751	0.0642297
EGLN3-AS1	2.90109	6.75798	2.30318	2.93419	0.00334418	0.135429		LINC02381	54.7118	-7.01006	2.16437	-3.23885	0.00120012	0.0720145
ISX	2.90109	6.75798	2.30318	2.93419	0.00334418	0.135429		LOC105369828	53.1028	-6.96671	2.16415	-3.21915	0.00128571	0.07555
LINC02288	2.90109	6.75798	2.30318	2.93419	0.00334418	0.135429		SZT2-AS1	51.823	-6.92278	2.13976	-3.2353	0.00121515	0.0726894
LOC105373938	2.90109	6.75798	2.30318	2.93419	0.00334418	0.135429		LOC105371059	50.3381	-6.89169	2.2149	-3.11151	0.00186135	0.0968878
LOC105376416	2.90109	6.75798	2.30318	2.93419	0.00334418	0.135429		DSG2-AS1	48.7732	-6.84401	2.16981	-3.1542	0.0016094	0.0877721
LOC107987294	2.90109	6.75798	2.30318	2.93419	0.00334418	0.135429		LOC112268415	48.1972	-6.8153	2.14697	-3.17438	0.00150158	0.0842331
RALY-AS1	2.90109	6.75798	2.30318	2.93419	0.00334418	0.135429		TBCK	47.4523	-6.80857	2.18595	-3.11469	0.00184139	0.0962663
TRR-CCG1-3	2.90109	6.75798	2.30318	2.93419	0.00334418	0.135429		LOC107984347	253.645	-6.7711	1.62706	-4.16156	3.16083e-05	0.00535023
TRX-CAT1-7	2.90109	6.75798	2.30318	2.93419	0.00334418	0.135429		MAF	46.2732	-6.77014	2.18035	-3.10507	0.00190232	0.0983482
UBE2V1	2.90109	6.75798	2.30318	2.93419	0.00334418	0.135429		IL20RB-AS1	46.5046	-6.76754	2.14299	-3.15799	0.00158863	0.0870546
LOC101927511	4.91556	6.71472	1.88478	3.5626	0.000367197	0.0322724		MYH14	45.5243	-6.74648	2.1635	-3.11832	0.00181885	0.0955459
ACE3P	2.32088	6.43604	2.51218	2.56194	0.0104091	0.263313		LOC105376106	44.9455	-6.72366	2.14546	-3.13391	0.00172496	0.0926884
APOBEC3F	2.32088	6.43604	2.51218	2.56194	0.0104091	0.263313		LOC102724748	44.9036	-6.7225	2.17493	-3.0909	0.00199552	0.100669
C16orf46	2.32088	6.43604	2.51218	2.56194	0.0104091	0.263313		NCOR2	44.4371	-6.716	2.19689	-3.05704	0.00223532	0.10799
CATSPER4	2.32088	6.43604	2.51218	2.56194	0.0104091	0.263313		KMO	45.0521	-6.71442	2.14941	-3.12385	0.00178501	0.0946387
GTF2IP5	2.32088	6.43604	2.51218	2.56194	0.0104091	0.263313		FAM13A-AS1	44.0143	-6.69712	2.18445	-3.06581	0.00217083	0.106669
HCG14	2.32088	6.43604	2.51218	2.56194	0.0104091	0.263313		LINC01637	43.6185	-6.68421	2.16256	-3.09088	0.00199567	0.100669
IL18R1	2.32088	6.43604	2.51218	2.56194	0.0104091	0.263313		TFPT	43.0248	-6.6586	2.14669	-3.1018	0.00192345	0.098549
LEMD1-AS1	2.32088	6.43604	2.51218	2.56194	0.0104091	0.263313		STEAP3-AS1	43.0256	-6.65587	2.15565	-3.08764	0.00201753	0.101548
LINC01303	2.32088	6.43604	2.51218	2.56194	0.0104091	0.263313		YBX3	41.7603	-6.6246	2.16276	-3.06304	0.00219102	0.106683
LOC100499489	2.32088	6.43604	2.51218	2.56194	0.0104091	0.263313		SNRK-AS1	41.8289	-6.62267	2.16061	-3.06519	0.00217529	0.106669
LOC105370008	2.32088	6.43604	2.51218	2.56194	0.0104091	0.263313		MAPK15	41.7881	-6.61851	2.16749	-3.05354	0.00226161	0.108538
LOC105370092	2.32088	6.43604	2.51218	2.56194	0.0104091	0.263313		COX20	41.3992	-6.60546	2.15391	-3.06674	0.00216409	0.106669
LOC105373225	2.32088	6.43604	2.51218	2.56194	0.0104091	0.263313		FAM200A	40.5798	-6.5826	2.20381	-2.98692	0.00281804	0.125771
LOC105375519	2.32088	6.43604	2.51218	2.56194	0.0104091	0.263313		LOC100288123	40.8053	-6.57376	2.1541	-3.05174	0.00227516	0.108538
LOC105377730	2.32088	6.43604	2.51218	2.56194	0.0104091	0.263313		ATP1B1	40.479	-6.57319	2.14593	-3.06309	0.00219063	0.106683
LOC112267994	2.32088	6.43604	2.51218	2.56194	0.0104091	0.263313		LOC107984485	38.0864	-6.48806	2.17516	-2.9828	0.00285623	0.126488
LY6G5C	2.32088	6.43604	2.51218	2.56194	0.0104091	0.263313		ISG20L2	38.6002	-6.48392	2.16802	-2.99071	0.00278331	0.124709
LYL1	2.32088	6.43604	2.51218	2.56194	0.0104091	0.263313		ZNF354C	37.6524	-6.47621	2.22052	-2.91652	0.00353955	0.139452
MIR12115	2.32088	6.43604	2.51218	2.56194	0.0104091	0.263313		MID1IP1-AS1	38.1277	-6.47277	2.16176	-2.99422	0.00275151	0.124483
MIR202HG	2.32088	6.43604	2.51218	2.56194	0.0104091	0.263313		CHERP	37.1906	-6.4495	2.16212	-2.98296	0.0028548	0.126488
MIR3184	2.32088	6.43604	2.51218	2.56194	0.0104091	0.263313		ZBTB45	37.1049	-6.43173	2.15699	-2.98181	0.00286546	0.126651
OLFML2A	2.32088	6.43604	2.51218	2.56194	0.0104091	0.263313		BAG2	36.9364	-6.43041	2.18109	-2.94826	0.00319567	0.134781
PCDHA@	2.32088	6.43604	2.51218	2.56194	0.0104091	0.263313		LOC100507346	36.2793	-6.42105	2.21742	-2.89573	0.00378274	0.145766
RPS2P13	2.32088	6.43604	2.51218	2.56194	0.0104091	0.263313		ARHGAP23	36.0762	-6.41736	2.23222	-2.87488	0.00404183	0.151908
SEC61G-DT	2.32088	6.43604	2.51218	2.56194	0.0104091	0.263313		PGM3	36.0123	-6.40164	2.15205	-2.97468	0.00293299	0.127789
ZNF100	2.32088	6.43604	2.51218	2.56194	0.0104091	0.263313		LOC107985304	587.527	-6.39559	1.1547	-5.53877	3.04611e-08	2.67718e-05
ARRDC3-AS1	6.06877	6.31739	1.68476	3.74973	0.000177022	0.019223		LOC101929291	35.8116	-6.39031	2.15565	-2.96445	0.00303227	0.130737
CBR3-AS1	3.63459	6.29968	2.0574	3.06196	0.00219892	0.106683		MYCBP2-AS1	35.5626	-6.38855	2.17944	-2.93128	0.0033757	0.135806
LOC100418868	3.63459	6.29968	2.0574	3.06196	0.00219892	0.106683		LOC105371824	35.4678	-6.36534	2.16967	-2.93379	0.00334853	0.135429
C9orf24	3.59462	6.29968	2.06403	3.05212	0.00227229	0.108538		LOC112268102	34.5958	-6.33121	2.16923	-2.91865	0.00351555	0.139227
LOC107985074	3.59462	6.29968	2.06403	3.05212	0.00227229	0.108538		NONO	34.2824	-6.32563	2.18039	-2.90115	0.00371793	0.144041
LOC653303	3.59462	6.29968	2.06403	3.05212	0.00227229	0.108538		RN7SKP23	34.34	-6.32493	2.1567	-2.93269	0.00336039	0.135578
B3GALNT1P1	3.57613	6.29968	2.06714	3.04753	0.00230729	0.109159		LOC105376224	33.9958	-6.32418	2.18052	-2.90031	0.00372794	0.144041
ZC3H6	5.43009	6.23742	1.73827	3.58829	0.000332855	0.0298278		ST7-AS1	33.7441	-6.30802	2.17181	-2.9045	0.00367837	0.144041
MRS2P2	8.70344	6.16192	1.50378	4.09761	4.17434e-05	0.00667047		AMZ1	368.105	-6.3056	1.16633	-5.40637	6.43137e-08	5.00814e-05
LOC286059	4.84987	6.06934	1.79658	3.37828	0.000729414	0.0527463		EXOSC10-AS1	33.678	-6.30423	2.15957	-2.91921	0.0035092	0.139216
SHISAL2A	3.17491	6.03664	2.17632	2.77378	0.00554093	0.181398		EIF4G1	33.4848	-6.29392	2.1686	-2.9023	0.00370439	0.144041
TPM3P1	3.17491	6.03664	2.17632	2.77378	0.00554093	0.181398		LOC107984190	33.2856	-6.29245	2.19706	-2.86403	0.00418286	0.155166
CHL1	3.05437	6.03664	2.18366	2.76446	0.00570174	0.184524		LOC105378519	32.3515	-6.25327	2.19396	-2.85022	0.00436884	0.158172
CYP2AC1P	3.0144	6.03664	2.19247	2.75335	0.00589894	0.187993		TNK2-AS1	32.1152	-6.24445	2.16868	-2.87938	0.00398458	0.150464
CRISPLD2	2.99591	6.03664	2.19662	2.74815	0.00599318	0.189419		EPHB4	31.9597	-6.24093	2.1823	-2.85979	0.00423918	0.155814
HRC	2.99591	6.03664	2.19662	2.74815	0.00599318	0.189419		HP11014	32.3671	-6.22114	2.1969	-2.83178	0.00462894	0.163487
AQP7P5	1.74066	6.021	2.82656	2.13015	0.0331591	0.485209		MARVELD3	31.351	-6.2149	2.21618	-2.80433	0.00504211	0.170919
ARHGAP29-AS1	1.74066	6.021	2.82656	2.13015	0.0331591	0.485209		ICAM3	31.9612	-6.21015	2.17709	-2.85251	0.00433761	0.157331
ARID3C	1.74066	6.021	2.82656	2.13015	0.0331591	0.485209		SMARCA4	30.7037	-6.18565	2.23467	-2.76803	0.00563956	0.183314
CDC27P9	1.74066	6.021	2.82656	2.13015	0.0331591	0.485209		ZNF503-AS2	30.8976	-6.17955	2.16441	-2.85508	0.0043026	0.15631
CHST2	1.74066	6.021	2.82656	2.13015	0.0331591	0.485209		PIGCP1	30.913	-6.16636	2.18075	-2.82763	0.00468942	0.164673
COL18A1-AS2	1.74066	6.021	2.82656	2.13015	0.0331591	0.485209		AFAP1-AS1	30.3282	-6.15799	2.16931	-2.83869	0.00452991	0.16144
CRYBA4	1.74066	6.021	2.82656	2.13015	0.0331591	0.485209		FLNB	30.0828	-6.15743	2.22115	-2.77218	0.00556826	0.181566
CUBNP2	1.74066	6.021	2.82656	2.13015	0.0331591	0.485209		DPP9-AS1	165.736	-6.15178	1.55209	-3.96356	7.38418e-05	0.0102888
FAM83C-AS1	1.74066	6.021	2.82656	2.13015	0.0331591	0.485209		TPM3	29.9639	-6.13809	2.17255	-2.82529	0.00472377	0.165303
FRRS1L	1.74066	6.021	2.82656	2.13015	0.0331591	0.485209		MIPEPP3	29.7156	-6.13262	2.2514	-2.72391	0.00645139	0.195926
GKAP1	1.74066	6.021	2.82656	2.13015	0.0331591	0.485209		EGFR-AS1	29.5342	-6.12585	2.22313	-2.75551	0.00586005	0.187809
GPC6	1.74066	6.021	2.82656	2.13015	0.0331591	0.485209		ZNF337	29.3223	-6.10697	2.16725	-2.81785	0.00483465	0.167643
HPX	1.74066	6.021	2.82656	2.13015	0.0331591	0.485209		ALDH1A3	29.1876	-6.10517	2.19258	-2.78446	0.00536162	0.179297
HSPA6	1.74066	6.021	2.82656	2.13015	0.0331591	0.485209		C1orf105	29.5922	-6.10486	2.16175	-2.82404	0.0047423	0.165445
HTRA1	1.74066	6.021	2.82656	2.13015	0.0331591	0.485209		LOC107985367	28.9674	-6.09549	2.20493	-2.76449	0.00570125	0.184524
LINC00374	1.74066	6.021	2.82656	2.13015	0.0331591	0.485209		LOC107987102	28.7415	-6.08402	2.18734	-2.78147	0.00541126	0.179297
LINC01280	1.74066	6.021	2.82656	2.13015	0.0331591	0.485209		SLC38A10	28.432	-6.07487	2.19145	-2.77208	0.00556991	0.181566
LINC01436	1.74066	6.021	2.82656	2.13015	0.0331591	0.485209		C14orf178	28.5822	-6.0687	2.16695	-2.80057	0.00510121	0.172183
LINC02863	1.74066	6.021	2.82656	2.13015	0.0331591	0.485209		LOC105377945	155.836	-6.06518	1.57206	-3.85811	0.000114268	0.013959
LOC100421622	1.74066	6.021	2.82656	2.13015	0.0331591	0.485209		GRK2	28.1956	-6.0636	2.21521	-2.73726	0.00619542	0.192099
LOC102724122	1.74066	6.021	2.82656	2.13015	0.0331591	0.485209		LOC105370062	28.2671	-6.0467	2.17616	-2.77861	0.00545915	0.18027
LOC105371235	1.74066	6.021	2.82656	2.13015	0.0331591	0.485209		LOC100131626	27.9443	-6.04081	2.19642	-2.7503	0.00595403	0.189179
LOC105372759	1.74066	6.021	2.82656	2.13015	0.0331591	0.485209		SBF2-AS1	27.8318	-6.03899	2.20314	-2.74108	0.00612378	0.192099
LOC105374308	1.74066	6.021	2.82656	2.13015	0.0331591	0.485209		FAT1	26.9893	-6.00347	2.22773	-2.69489	0.00704126	0.206282
LOC105375864	1.74066	6.021	2.82656	2.13015	0.0331591	0.485209		GLIS2	27.0954	-6.00049	2.17869	-2.75418	0.00588397	0.187993
LOC105377447	1.74066	6.021	2.82656	2.13015	0.0331591	0.485209		POLH	27.2	-5.99333	2.17709	-2.7529	0.00590692	0.187993
LOC105377909	1.74066	6.021	2.82656	2.13015	0.0331591	0.485209		SLC12A9	148.011	-5.9921	1.55989	-3.84136	0.000122355	0.0146384
LOC105377981	1.74066	6.021	2.82656	2.13015	0.0331591	0.485209		DCBLD1	26.283	-5.95585	2.24206	-2.65642	0.00789754	0.222799
LOC105378741	1.74066	6.021	2.82656	2.13015	0.0331591	0.485209		IGSF3P1	25.7291	-5.92356	2.22027	-2.66794	0.00763176	0.217448
LOC105379406	1.74066	6.021	2.82656	2.13015	0.0331591	0.485209		MTOR-AS1	25.7863	-5.90883	2.17001	-2.72295	0.00647018	0.195926
LOC107985119	1.74066	6.021	2.82656	2.13015	0.0331591	0.485209		PRRC2A	25.1294	-5.90042	2.29324	-2.57296	0.0100832	0.263313
LOC107985817	1.74066	6.021	2.82656	2.13015	0.0331591	0.485209		PCNX4-DT	25.0533	-5.88987	2.28545	-2.57712	0.00996281	0.262281
LOC107986553	1.74066	6.021	2.82656	2.13015	0.0331591	0.485209		LOC440300	25.2651	-5.88623	2.36253	-2.49149	0.0127208	0.299531
LOC107986960	1.74066	6.021	2.82656	2.13015	0.0331591	0.485209		LOC105370902	25.4559	-5.88036	2.18583	-2.69022	0.0071405	0.207914
LOC643406	1.74066	6.021	2.82656	2.13015	0.0331591	0.485209		PARP8	25.0077	-5.87981	2.17785	-2.69982	0.00693769	0.204358
MAB21L4	1.74066	6.021	2.82656	2.13015	0.0331591	0.485209		ZFAT-AS1	25.4219	-5.87914	2.19183	-2.6823	0.00731185	0.210939
MIR3191	1.74066	6.021	2.82656	2.13015	0.0331591	0.485209		RBM4	24.9977	-5.87659	2.19683	-2.67503	0.00747233	0.213799
NSA2P1	1.74066	6.021	2.82656	2.13015	0.0331591	0.485209		NUDT13	24.5928	-5.84116	2.17288	-2.68822	0.00718345	0.208576
NXPH3	1.74066	6.021	2.82656	2.13015	0.0331591	0.485209		LINC01271	24.2235	-5.84093	2.22452	-2.6257	0.00864707	0.237887
OBP2B	1.74066	6.021	2.82656	2.13015	0.0331591	0.485209		LOC105371998	24.2315	-5.83877	2.23238	-2.61549	0.00890986	0.243249
OR2T1	1.74066	6.021	2.82656	2.13015	0.0331591	0.485209		INCA1	24.0541	-5.83085	2.23292	-2.61131	0.00901949	0.245655
OTOP2	1.74066	6.021	2.82656	2.13015	0.0331591	0.485209		MAP7D1	23.7663	-5.81987	2.21252	-2.63042	0.00852791	0.235636
PIN1P1	1.74066	6.021	2.82656	2.13015	0.0331591	0.485209		LOC107984334	23.4917	-5.79684	2.24695	-2.57986	0.00988391	0.260805
RALYL	1.74066	6.021	2.82656	2.13015	0.0331591	0.485209		YWHAE	23.7411	-5.77557	2.26336	-2.55177	0.0107177	0.267663
RND1	1.74066	6.021	2.82656	2.13015	0.0331591	0.485209		SMAD1-AS1	23.1882	-5.76903	2.19375	-2.62976	0.00854452	0.23581
RPL27AP	1.74066	6.021	2.82656	2.13015	0.0331591	0.485209		KRT86	22.8262	-5.75958	2.27939	-2.52681	0.0115105	0.281312
RPL36AL	1.74066	6.021	2.82656	2.13015	0.0331591	0.485209		ALPK3	22.6786	-5.75515	2.2503	-2.5575	0.0105427	0.265657
RPS3AP6	1.74066	6.021	2.82656	2.13015	0.0331591	0.485209		ELOA-AS1	125.795	-5.75058	1.56744	-3.66877	0.000243719	0.023918
SCARNA2	1.74066	6.021	2.82656	2.13015	0.0331591	0.485209		DEK	22.0747	-5.71571	2.23599	-2.55623	0.0105814	0.265708
SETDB2	1.74066	6.021	2.82656	2.13015	0.0331591	0.485209		ILF3	21.9444	-5.6957	2.19089	-2.59972	0.00932997	0.251414
SLIT3-AS1	1.74066	6.021	2.82656	2.13015	0.0331591	0.485209		RBM25	22.4188	-5.68779	2.22469	-2.55666	0.0105682	0.265671
SPATA31D2P	1.74066	6.021	2.82656	2.13015	0.0331591	0.485209		HSPA5	21.9492	-5.6813	2.2178	-2.56168	0.0104168	0.263313
SPTBN4	1.74066	6.021	2.82656	2.13015	0.0331591	0.485209		FAM83H	21.5415	-5.67365	2.20369	-2.57461	0.0100354	0.263313
STX11	1.74066	6.021	2.82656	2.13015	0.0331591	0.485209		ZCWPW2	21.5809	-5.66667	2.20428	-2.57075	0.0101478	0.263313
TERC	1.74066	6.021	2.82656	2.13015	0.0331591	0.485209		DUOX1	21.6587	-5.66301	2.18696	-2.58945	0.00961304	0.25669
TLE6	1.74066	6.021	2.82656	2.13015	0.0331591	0.485209		KLF5	21.2745	-5.6546	2.19179	-2.57991	0.00988273	0.260805
TMEM270	1.74066	6.021	2.82656	2.13015	0.0331591	0.485209		OSBP2	21.2583	-5.64277	2.17956	-2.58895	0.00962684	0.25669
WWP1-AS1	1.74066	6.021	2.82656	2.13015	0.0331591	0.485209		HYOU1	21.2744	-5.64115	2.19132	-2.57432	0.0100437	0.263313
RPS10P13	16.9149	5.78498	1.09405	5.28768	1.23877e-07	8.32566e-05		LOC100287290	21.0016	-5.63846	2.23403	-2.52389	0.0116063	0.282745
TMEM191A	7.43733	5.71872	1.45983	3.9174	8.95104e-05	0.0117552		GARS1	20.899	-5.62328	2.1832	-2.57571	0.0100036	0.263052
LOC100190934	4.36809	5.71778	1.94158	2.94492	0.00323042	0.135429		HUWE1	20.9507	-5.61608	2.22636	-2.52254	0.0116512	0.282849
LOC100303749	2.59469	5.71471	2.34132	2.44081	0.0146544	0.32702		SOX9	20.4829	-5.60296	2.21809	-2.52603	0.0115361	0.281335
LOC105373994	2.59469	5.71471	2.34132	2.44081	0.0146544	0.32702		MET	20.3536	-5.59285	2.19919	-2.54315	0.0109859	0.271687
KY	2.47415	5.71471	2.35637	2.42521	0.0152993	0.334871		INO80-AS1	20.476	-5.58445	2.18393	-2.55706	0.010556	0.265657
PLA2G4D	2.47415	5.71471	2.35637	2.42521	0.0152993	0.334871		PPL	20.1341	-5.58315	2.24088	-2.4915	0.0127206	0.299531
TMX4-AS1	2.47415	5.71471	2.35637	2.42521	0.0152993	0.334871		LOC100505549	20.4851	-5.58092	2.18645	-2.5525	0.0106953	0.267393
LOC102723758	2.43418	5.71471	2.36874	2.41255	0.0158414	0.341876		ITFG1-AS1	20.478	-5.56448	2.21526	-2.51188	0.0120089	0.290081
MIR760	2.43418	5.71471	2.36874	2.41255	0.0158414	0.341876		XRCC6	20.0707	-5.56021	2.20902	-2.51704	0.0118344	0.28647
H2AZ1-DT	2.41569	5.71471	2.37458	2.40662	0.0161008	0.341876		SLC45A4	19.6807	-5.5469	2.21797	-2.50089	0.0123881	0.295799
LOC107986659	2.41569	5.71471	2.37458	2.40662	0.0161008	0.341876		TNKS1BP1	19.9033	-5.54539	2.20668	-2.513	0.0119709	0.289467
LYRM7	2.41569	5.71471	2.37458	2.40662	0.0161008	0.341876		HMGA1P2	19.5925	-5.54219	2.30857	-2.40071	0.0163635	0.344947
MIR203B	2.41569	5.71471	2.37458	2.40662	0.0161008	0.341876		ACOXL	20.3159	-5.5414	2.23228	-2.48239	0.0130504	0.303682
NAA80	2.41569	5.71471	2.37458	2.40662	0.0161008	0.341876		HNRNPM	20.0608	-5.53241	2.25437	-2.45408	0.0141244	0.319923
PKD1L2	2.41569	5.71471	2.37458	2.40662	0.0161008	0.341876		LOC107987245	19.7053	-5.53226	2.19317	-2.52249	0.0116527	0.282849
NDUFB1	3.67095	5.70214	2.05016	2.78131	0.00541399	0.179297		PLIN4	19.7749	-5.5268	2.18451	-2.53	0.0114063	0.279662
NABP1	7.53938	5.68163	1.45922	3.8936	9.87682e-05	0.0125386		POLE	19.2636	-5.51496	2.28607	-2.41242	0.0158468	0.341876
RPL9P8	124.686	5.67598	1.88619	3.00924	0.00261904	0.119695		LOC107985921	19.5476	-5.51338	2.21815	-2.48557	0.0129345	0.302003
SETX	16.1693	5.59993	1.12925	4.95899	7.08618e-07	0.000311397		ZEB1	19.2291	-5.51282	2.25286	-2.44703	0.0144038	0.323549
NDUFAF3	38.4159	5.54809	0.811552	6.83639	8.12113e-12	4.6394e-08		AP3D1	19.1387	-5.5119	2.26456	-2.43399	0.0149335	0.32981
OTUD7B	28.2389	5.50796	0.940992	5.85335	4.81757e-09	6.47566e-06		SLF1	19.3689	-5.50971	2.20482	-2.49894	0.0124566	0.296685
PRSS12	9.38911	5.50268	1.37402	4.0048	6.20703e-05	0.0090342		LOC100128494	2228.37	-5.50712	0.675908	-8.14774	3.70801e-16	4.23659e-12
PSD	3.90841	5.49308	1.95802	2.80543	0.00502501	0.170919		MESD	106.269	-5.50629	1.55503	-3.54097	0.000398666	0.0342478
SMG1P5	22.4943	5.46215	1.01106	5.40242	6.57496e-08	5.00814e-05		LYPD1	105.599	-5.49589	1.5606	-3.52166	0.000428859	0.0361619
GPR89B	5.06162	5.43486	1.7406	3.12242	0.00179373	0.094881		FAAP100	19.1517	-5.49351	2.1881	-2.51063	0.0120516	0.290768
EFNA5	6.37894	5.41731	1.53201	3.53609	0.000406092	0.0346254		DNAJC11	19.2134	-5.49215	2.19798	-2.49872	0.0124641	0.296685
H2AC21	5.16366	5.41656	1.68342	3.21759	0.00129272	0.07555		C12orf73	19.3032	-5.49128	2.19424	-2.50258	0.012329	0.295173
CPNE9	3.10922	5.39915	2.07176	2.60606	0.00915898	0.24827		ANKRD19P	18.9868	-5.48886	2.21875	-2.47385	0.0133666	0.307754
LINC01465	23.4356	5.39139	0.99387	5.42465	5.80693e-08	4.9146e-05		WDR88	19.1299	-5.4873	2.19357	-2.50154	0.0123655	0.29557
LOC105375919	3.26972	5.34893	2.05557	2.60216	0.0092639	0.25052		KAZN	18.7684	-5.47442	2.20759	-2.47981	0.0131452	0.30539
H2AC18	3.28821	5.30075	2.05988	2.57333	0.0100726	0.263313		ERI1	18.6962	-5.47401	2.31077	-2.36892	0.0178403	0.361182
BTBD9-AS1	2.01447	5.29967	2.57958	2.05446	0.0399307	0.533706		KHSRP	18.9049	-5.47016	2.2195	-2.46459	0.0137168	0.312506
CHN2-AS1	2.01447	5.29967	2.57958	2.05446	0.0399307	0.533706		PP2D1	19.1632	-5.46466	2.24338	-2.43591	0.0148544	0.329232
H2AZP6	2.01447	5.29967	2.57958	2.05446	0.0399307	0.533706		ITGB1	18.5397	-5.46274	2.21831	-2.46257	0.0137944	0.31396
HMGN2P2	2.01447	5.29967	2.57958	2.05446	0.0399307	0.533706		BDNF-AS	18.6642	-5.46192	2.21165	-2.46961	0.0135259	0.310633
LOC105371929	2.01447	5.29967	2.57958	2.05446	0.0399307	0.533706		CREBBP	18.4706	-5.45881	2.31145	-2.36164	0.0181942	0.363421
ZNF853	2.01447	5.29967	2.57958	2.05446	0.0399307	0.533706		FBXL22	18.4879	-5.45376	2.2495	-2.42443	0.0153324	0.334954
ADGRF5	1.89394	5.29967	2.60977	2.0307	0.0422855	0.547117		CD24	19.1545	-5.45325	2.30027	-2.3707	0.0177544	0.360308
HILPDA-AS1	1.89394	5.29967	2.60977	2.0307	0.0422855	0.547117		TLDC2	18.9072	-5.44282	2.21672	-2.45535	0.0140746	0.319384
ICE2P2	1.89394	5.29967	2.60977	2.0307	0.0422855	0.547117		ITGA6	18.2842	-5.43644	2.20366	-2.467	0.013625	0.311875
LOC101930112	1.89394	5.29967	2.60977	2.0307	0.0422855	0.547117		HK2	18.5344	-5.43128	2.19491	-2.47449	0.0133428	0.307754
LOC105374423	1.89394	5.29967	2.60977	2.0307	0.0422855	0.547117		PRKCZ-AS1	17.9886	-5.40611	2.20918	-2.44711	0.0144006	0.323549
LOC107984352	1.89394	5.29967	2.60977	2.0307	0.0422855	0.547117		LOC105373311	17.7786	-5.40387	2.23929	-2.41321	0.0158128	0.341876
NAA11	1.89394	5.29967	2.60977	2.0307	0.0422855	0.547117		LRP5	17.6144	-5.39384	2.26108	-2.38551	0.0170554	0.353338
PLXDC2	1.89394	5.29967	2.60977	2.0307	0.0422855	0.547117		ARL14EPP1	17.6788	-5.38857	2.24799	-2.39706	0.0165273	0.346164
SEPTIN7P4	1.89394	5.29967	2.60977	2.0307	0.0422855	0.547117		AKAP17A	17.5172	-5.38328	2.2858	-2.35509	0.0185182	0.366055
TMEM256-PLSCR3	1.89394	5.29967	2.60977	2.0307	0.0422855	0.547117		LOC105378552	17.7444	-5.3793	2.21519	-2.42837	0.0151669	0.33352
UROC1	1.89394	5.29967	2.60977	2.0307	0.0422855	0.547117		LOC107985322	17.7076	-5.37028	2.20707	-2.43321	0.0149654	0.330092
ZNF34	1.89394	5.29967	2.60977	2.0307	0.0422855	0.547117		PROB1	95.7498	-5.36407	1.63389	-3.28302	0.00102703	0.0644744
ZNF451-AS1	1.89394	5.29967	2.60977	2.0307	0.0422855	0.547117		ITGB7	17.3465	-5.3627	2.25914	-2.37378	0.0176071	0.359231
EIF5A2	1.85396	5.29966	2.62865	2.01612	0.0437877	0.55359		NUDT22	17.614	-5.36015	2.21059	-2.42476	0.0153187	0.334954
GGT6	1.85396	5.29966	2.62865	2.01612	0.0437877	0.55359		XBP1	16.8905	-5.33181	2.25521	-2.36422	0.018068	0.362805
LOC105376829	1.85396	5.29966	2.62865	2.01612	0.0437877	0.55359		HCG18	17.0074	-5.33052	2.21977	-2.40138	0.0163332	0.34477
SNPH	1.85396	5.29966	2.62865	2.01612	0.0437877	0.55359		SMG5	16.9595	-5.32998	2.21216	-2.4094	0.0159786	0.341876
ZFAND3-DT	1.85396	5.29966	2.62865	2.01612	0.0437877	0.55359		IL17RB	17.0859	-5.32714	2.22347	-2.39587	0.0165811	0.346974
BIN2	1.83547	5.29966	2.6376	2.00927	0.0445081	0.554943		WDFY3-AS1	16.8675	-5.32551	2.25655	-2.36003	0.0182736	0.363421
CEP83-DT	1.83547	5.29966	2.6376	2.00927	0.0445081	0.554943		DNMBP-AS1	17.0914	-5.32414	2.23548	-2.38165	0.0172351	0.35545
CHST7	1.83547	5.29966	2.6376	2.00927	0.0445081	0.554943		AARS1	17.0739	-5.32337	2.26011	-2.35536	0.0185048	0.366055
DICER1-AS1	1.83547	5.29966	2.6376	2.00927	0.0445081	0.554943		MUS81	16.9168	-5.31982	2.24038	-2.37452	0.0175717	0.358831
E2F2	1.83547	5.29966	2.6376	2.00927	0.0445081	0.554943		SNRNP200	16.7602	-5.31515	2.24016	-2.37266	0.0176603	0.359638
EPB41L4A-DT	1.83547	5.29966	2.6376	2.00927	0.0445081	0.554943		PDIA4	16.795	-5.31173	2.23903	-2.37233	0.0176762	0.359638
LOC107984913	1.83547	5.29966	2.6376	2.00927	0.0445081	0.554943		EML4	16.6774	-5.307	2.22056	-2.38994	0.0168513	0.350699
LOC107985416	1.83547	5.29966	2.6376	2.00927	0.0445081	0.554943		ZNF8-DT	16.8929	-5.30474	2.21224	-2.39791	0.0164891	0.346004
MB21D2	1.83547	5.29966	2.6376	2.00927	0.0445081	0.554943		PPM1F-AS1	16.8522	-5.30433	2.20074	-2.41025	0.0159418	0.341876
RPSAP47	1.83547	5.29966	2.6376	2.00927	0.0445081	0.554943		KIF1C	16.8396	-5.30225	2.22477	-2.38328	0.0171594	0.354791
SGO2	1.83547	5.29966	2.6376	2.00927	0.0445081	0.554943		TGM2	16.5215	-5.30215	2.34034	-2.26555	0.0234792	0.418718
UBE2Q2P2	1.83547	5.29966	2.6376	2.00927	0.0445081	0.554943		LOC105379189	16.7494	-5.29987	2.22403	-2.383	0.017172	0.354791
SLC7A5P2	20.3222	5.2964	1.01399	5.22331	1.75755e-07	0.000111561		LCTL	91.573	-5.29697	1.57764	-3.35752	0.000786447	0.0546234
LOC102724584	4.4814	5.23889	1.81202	2.89119	0.00383789	0.146901		TMEM44	16.4594	-5.28229	2.22314	-2.37605	0.0174993	0.35767
NFKBID	10.258	5.23422	1.3338	3.9243	8.69814e-05	0.0114891		ALG1L9P	16.6191	-5.27827	2.21166	-2.38657	0.0170065	0.352646
LOC105373184	3.20765	5.21146	2.16516	2.40696	0.0160859	0.341876		LOC112268169	16.3279	-5.27632	2.23973	-2.35578	0.0184839	0.366055
ATPSCKMT	3.78425	5.20027	1.90108	2.73544	0.00622978	0.192099		DNMT1	16.3022	-5.27571	2.22468	-2.37145	0.0177186	0.359899
CA3-AS1	3.78425	5.20027	1.90108	2.73544	0.00622978	0.192099		NFE2L1	16.2087	-5.27491	2.26975	-2.324	0.0201255	0.384724
PIK3R3	5.85719	5.19449	1.53556	3.3828	0.00071751	0.0521685		NOTCH1	16.2508	-5.27384	2.2423	-2.35198	0.0186738	0.367541
ZNF800	3.80274	5.16549	1.89998	2.71871	0.00655379	0.197574		BACE1	90.3082	-5.27234	1.56314	-3.37292	0.000743749	0.0531819
NSUN4	9.02424	5.15035	1.36027	3.78627	0.000152928	0.0172145		LOC100652999	89.8553	-5.27033	1.60244	-3.28895	0.00100562	0.0639694
LPIN3	3.82423	5.14252	1.89784	2.70966	0.00673514	0.201446		LOC112268252	16.8105	-5.26505	2.24856	-2.34152	0.0192055	0.37382
ATP5MJ	2.51051	5.13124	2.35576	2.17817	0.0293937	0.474683		PLEKHG4	16.0456	-5.25565	2.25571	-2.32993	0.0198101	0.382061
MTPAP	2.51051	5.13124	2.35576	2.17817	0.0293937	0.474683		LOC107984263	16.2593	-5.25464	2.23298	-2.3532	0.0186129	0.367217
RPL29P21	2.51051	5.13124	2.35576	2.17817	0.0293937	0.474683		LOC105371492	16.6011	-5.25016	2.25604	-2.32716	0.0199567	0.383705
NUP210L	23.936	5.12374	0.889728	5.75877	8.47284e-09	9.21966e-06		PROSER2-AS1	88.5233	-5.24958	1.62477	-3.23096	0.00123373	0.0734168
RPS26P25	3.94476	5.09008	1.89142	2.69115	0.00712071	0.20781		GPN3	16.3654	-5.2477	2.22272	-2.36094	0.0182287	0.363421
CISD1	2.529	5.08112	2.22735	2.28123	0.0225345	0.408356		ORC4	16.1442	-5.24197	2.20422	-2.37815	0.0173997	0.356592
COMMD8	2.529	5.08112	2.22735	2.28123	0.0225345	0.408356		ICMT	15.9334	-5.23368	2.21173	-2.36632	0.0179657	0.361904
POMT2	2.529	5.08112	2.22735	2.28123	0.0225345	0.408356		ZCCHC18	16.0837	-5.22692	2.21025	-2.36486	0.018037	0.362511
CICP6	3.86121	5.07215	1.89911	2.67081	0.00756693	0.21587		LOC105373020	15.9546	-5.2242	2.21233	-2.3614	0.018206	0.363421
EPHA2-AS1	36.4787	5.05814	0.784623	6.44659	1.14395e-10	3.73433e-07		GCC2-AS1	15.8137	-5.21681	2.22258	-2.34719	0.0189157	0.370071
CLSTN2	2.68951	5.02576	2.20234	2.28201	0.0224888	0.408356		LOC647070	86.5066	-5.21613	1.609	-3.24185	0.00118756	0.0717911
NLRP12	2.56897	5.02565	2.21351	2.27044	0.023181	0.416112		CRTC3-AS1	15.5998	-5.20742	2.2567	-2.30754	0.0210246	0.394121
MEGF10	2.58746	4.9728	2.21491	2.24515	0.0247588	0.435873		NCMAP-DT	15.9556	-5.19347	2.25368	-2.30444	0.0211977	0.395707
PKHD1L1	2.58746	4.9728	2.21491	2.24515	0.0247588	0.435873		GMDS	15.8522	-5.19203	2.26099	-2.29636	0.0216556	0.400221
LOC101927727	6.13823	4.93144	1.69993	2.90098	0.00372003	0.144041		HDGFL2	15.3503	-5.19045	2.24604	-2.31093	0.0208369	0.391888
CTSV	3.22252	4.90856	2.01402	2.43719	0.0148018	0.328384		MLPH	15.3086	-5.18685	2.23234	-2.3235	0.0201524	0.384724
LOC105369389	3.22252	4.90856	2.01402	2.43719	0.0148018	0.328384		LOC105378011	15.9327	-5.18389	2.26752	-2.28615	0.0222454	0.406664
ROR1-AS1	6.56857	4.89827	1.49182	3.28343	0.00102552	0.0644744		SLC38A1	15.7178	-5.18247	2.23352	-2.32031	0.0203238	0.385455
AADACL2-AS1	2.74797	4.87978	2.21185	2.2062	0.0273702	0.458731		ARGLU1	15.1454	-5.17731	2.28967	-2.26116	0.0237495	0.422005
GPR18	2.74797	4.87978	2.21185	2.2062	0.0273702	0.458731		LOC727978	15.248	-5.17457	2.23016	-2.32027	0.0203262	0.385455
FAIM	4.65677	4.86915	1.69608	2.87083	0.00409393	0.153361		PRKCSH	15.1812	-5.1663	2.22137	-2.32573	0.0200331	0.383705
TRNAU1AP	10.8135	4.86661	1.32685	3.66781	0.00024464	0.023918		SLC34A3	15.0324	-5.16148	2.24459	-2.29953	0.0214751	0.397908
UPP1	16.3303	4.84867	1.04083	4.65847	3.18574e-06	0.0009333		GDE1	15.3203	-5.15633	2.22099	-2.32164	0.0202526	0.385455
LOC105373943	14.8752	4.84284	1.15769	4.18321	2.87427e-05	0.00493834		PODXL	15.0662	-5.15356	2.21615	-2.32545	0.0200478	0.383705
COQ10B	3.36454	4.8256	2.00128	2.41126	0.0158976	0.341876		LOC107985044	15.0747	-5.14971	2.21447	-2.32548	0.0200461	0.383705
ZHX2	23.7493	4.79868	0.902846	5.31506	1.06624e-07	7.40414e-05		YARS1	15.2984	-5.14822	2.23351	-2.30499	0.021167	0.395492
LOC105378629	5.9048	4.76897	1.50572	3.16724	0.00153895	0.0851491		AFDN	14.9408	-5.14719	2.2231	-2.31532	0.0205953	0.388439
PEAK3	3.93753	4.76207	1.77562	2.68191	0.00732024	0.210939		ATP2A2	14.8056	-5.14299	2.27243	-2.26321	0.0236226	0.420077
HENMT1	17.98	4.74318	1.01312	4.68176	2.84426e-06	0.000844081		BRD3	15.0811	-5.13371	2.21208	-2.32077	0.0202995	0.385455
RPL12P44	3.40152	4.7384	2.00741	2.36045	0.0182527	0.363421		NT5DC4	14.8169	-5.13148	2.22478	-2.30651	0.021082	0.394226
LOC107986396	3.97751	4.71549	1.84884	2.55051	0.0107564	0.268042		BCAS1	14.8132	-5.13141	2.23118	-2.29987	0.0214558	0.397908
TRMO	3.97751	4.71549	1.84884	2.55051	0.0107564	0.268042		DEF8	14.8983	-5.12879	2.21083	-2.31985	0.020349	0.385538
USF1	19.4004	4.64787	0.988348	4.70267	2.56782e-06	0.000782364		LOC100288162	14.88	-5.12021	2.24984	-2.27581	0.0228574	0.412244
SERTAD1	19.6702	4.64329	0.929028	4.99801	5.79254e-07	0.000273521		IPPK	15.0109	-5.11832	2.22133	-2.30417	0.0212131	0.395707
MED18	2.62381	4.63378	2.16801	2.13734	0.0325701	0.485209		LOC100289580	161.678	-5.11536	1.22213	-4.18562	2.84389e-05	0.00493834
CDK5R1	2.6423	4.59418	2.16615	2.1209	0.0339305	0.489795		EPCAM	14.7467	-5.11468	2.25022	-2.27297	0.0230281	0.413981
GIPR	3.48147	4.58616	2.01793	2.2727	0.0230442	0.413981		LOC105376411	14.7581	-5.11426	2.23052	-2.29285	0.0218567	0.402644
LOC105375549	6.84239	4.58554	1.46346	3.13336	0.0017282	0.0926884		EPB41L5	14.6876	-5.11385	2.23894	-2.28405	0.0223686	0.407286
LOC107984952	10.7506	4.5656	1.20745	3.78118	0.000156084	0.0174837		KDM1A	14.7259	-5.11338	2.21503	-2.3085	0.0209715	0.393772
CCDC134	18.3235	4.54188	0.934452	4.86047	1.17105e-06	0.000453553		HOXB-AS1	241.716	-5.10965	1.07129	-4.76961	1.84585e-06	0.000639083
MORC3	6.83579	4.53763	1.47345	3.07959	0.00207287	0.103648		AGAP3	14.4474	-5.10451	2.24088	-2.27791	0.0227321	0.41031
DCAKD	3.99238	4.53728	1.82099	2.49165	0.0127152	0.299531		SPACA6	14.4575	-5.10428	2.24925	-2.26932	0.0232487	0.416573
LOC107984772	2.68228	4.5246	2.06473	2.19138	0.0284246	0.467962		MYLK-AS1	14.7747	-5.09602	2.21934	-2.29619	0.0216653	0.400221
PPIL4	2.68228	4.5246	2.06473	2.19138	0.0284246	0.467962		LOC107985504	14.4364	-5.09282	2.26978	-2.24375	0.0248482	0.436103
PRIM2BP	2.68228	4.5246	2.06473	2.19138	0.0284246	0.467962		LOC107985154	159.935	-5.09243	1.18778	-4.28736	1.80811e-05	0.00358726
KLHL12	17.3053	4.5205	1.06772	4.2338	2.29778e-05	0.00423441		DPY19L2P3	14.2401	-5.083	2.37189	-2.14302	0.0321116	0.485209
RBX1	2.78432	4.50158	2.14658	2.09709	0.0359856	0.506658		LMNB2	14.1812	-5.082	2.25922	-2.24945	0.0244839	0.431698
GPR89A	3.3758	4.47443	1.87715	2.38363	0.0171427	0.354791		EIF2AK4	14.7596	-5.08063	2.23952	-2.26863	0.023291	0.416776
PGM2L1	2.72225	4.45804	2.15989	2.06401	0.0390166	0.528806		TTC36-AS1	78.7792	-5.07832	1.59444	-3.18502	0.00144743	0.0822768
NUDT14	3.39729	4.45533	1.95895	2.27434	0.0229454	0.412855		TOP1	14.1833	-5.07427	2.23533	-2.27004	0.0232053	0.41622
UCA1	3.41578	4.42236	1.8772	2.35582	0.0184816	0.366055		CPEB3	77.7319	-5.0617	1.58319	-3.19715	0.00138793	0.0800901
BABAM2	8.17863	4.41164	1.3216	3.3381	0.000843547	0.0573687		LOC112268052	466.908	-5.05802	0.910707	-5.55395	2.79285e-08	2.55278e-05
CLIP4	4.09081	4.40781	1.72486	2.55545	0.0106049	0.265716		PMEPA1	13.9967	-5.05442	2.24047	-2.25597	0.0240725	0.42642
PPP1R27	4.97056	4.40101	1.60937	2.73461	0.00624535	0.192099		LOC112268109	154.781	-5.05047	1.1987	-4.21329	2.51673e-05	0.00449296
WDR74	73.9042	4.38746	0.649795	6.75207	1.45746e-11	6.66088e-08		TOMM40P4	13.87	-5.04608	2.29965	-2.19428	0.0282156	0.465985
C12orf76	2.84279	4.38317	2.05549	2.13242	0.0329726	0.485209		LOC731755	14.1525	-5.03984	2.22218	-2.26798	0.0233306	0.417157
ZAN	4.1093	4.38157	1.7266	2.53769	0.0111588	0.274774		BRCA2	13.7839	-5.03645	2.37437	-2.12118	0.033907	0.489765
GLA	3.49634	4.37709	1.8723	2.33781	0.019397	0.376585		SELENOO	13.7962	-5.03517	2.2655	-2.22254	0.0262467	0.447321
LOC112268231	4.80283	4.35402	1.62641	2.67707	0.00742683	0.213204		LGALS8-AS1	13.6881	-5.02588	2.33002	-2.15701	0.0310046	0.485209
ZCCHC2	5.56142	4.32696	1.49947	2.88565	0.00390603	0.148713		LOC107986196	75.4838	-5.01932	1.61053	-3.11656	0.00182974	0.0958975
SERPINF2	3.53631	4.32648	1.80487	2.39711	0.0165251	0.346164		CSNK1G2	13.7231	-5.01859	2.23778	-2.24266	0.0249186	0.436599
MIR328	2.71863	4.291	2.13891	2.00616	0.0448391	0.556857		EHMT2	13.7728	-5.01595	2.22006	-2.25937	0.0238602	0.422987
RPL21P28	2.71863	4.291	2.13891	2.00616	0.0448391	0.556857		GPRC5D	14.1383	-5.01537	2.25478	-2.22433	0.0261262	0.44653
TEX264	2.71863	4.291	2.13891	2.00616	0.0448391	0.556857		NRBP2	13.6409	-5.00987	2.24438	-2.23218	0.0256029	0.442885
ZNF19	2.71863	4.291	2.13891	2.00616	0.0448391	0.556857		FANCD2OS	14.1021	-5.00986	2.29826	-2.17985	0.0292687	0.474683
RPL18AP3	27.9841	4.25571	0.82588	5.15294	2.56439e-07	0.000142924		MPRIP	13.4201	-5.0045	2.28895	-2.18638	0.028788	0.471228
RPL21P16	2.96332	4.2445	2.15951	1.96549	0.0493577	0.586129		BEND3P3	74.5336	-5.00086	1.69877	-2.9438	0.00324204	0.135429
MTCO3P43	5.02541	4.2266	1.61225	2.62156	0.00875283	0.239821		SBF2	13.61	-5.0008	2.22123	-2.25136	0.0243625	0.430223
FBXO44	3.65684	4.21216	1.87994	2.24059	0.0250527	0.43762		TBC1D10C	13.5137	-4.99956	2.26371	-2.20857	0.0272047	0.458109
H2BU1	5.63476	4.20793	1.68157	2.50238	0.012336	0.295173		ATP9A	13.6776	-4.99738	2.22856	-2.24243	0.0249338	0.436599
LRIF1	10.1344	4.20393	1.26326	3.32785	0.00087519	0.0588205		NUTM2B-AS1	13.4589	-4.99366	2.24908	-2.22032	0.0263972	0.448812
UBXN11	31.824	4.1814	0.882631	4.73743	2.16441e-06	0.000723865		KREMEN2	13.6831	-4.99338	2.23626	-2.23292	0.0255543	0.442885
NFU1	4.32827	4.17159	1.76561	2.36269	0.018143	0.363421		DIS3L	13.8942	-4.99335	2.24856	-2.22069	0.026372	0.448717
ZNF79	8.63804	4.16004	1.26783	3.28123	0.00103354	0.0647053		TMEM190	13.6514	-4.99293	2.22643	-2.24258	0.0249242	0.436599
RPS6P11	3.63475	4.15585	1.99805	2.07996	0.0375296	0.517967		LOC101927764	13.5139	-4.99279	2.22828	-2.24064	0.0250493	0.43762
RPS10P19	7.652	4.14332	1.53345	2.70195	0.00689341	0.204308		LOC105371026	13.5139	-4.99256	2.23984	-2.22898	0.0258153	0.443865
LOC648987	147.561	4.14143	0.738362	5.60894	2.0357e-08	1.93824e-05		RNF43	13.3003	-4.99195	2.28175	-2.18777	0.0286863	0.470591
LDLRAD4	3.57266	4.13352	1.842	2.24404	0.02483	0.436103		SEMA4D	13.3632	-4.98757	2.31332	-2.15603	0.0310814	0.485209
METTL23	8.51028	4.13088	1.22411	3.37459	0.000739262	0.0531223		TLK2	13.7365	-4.98583	2.23342	-2.23237	0.0255904	0.442885
CATSPERE	4.40883	4.1301	1.74472	2.3672	0.0179232	0.361804		UBE2Q1	13.3514	-4.98433	2.23644	-2.22869	0.0258343	0.443865
LOC105369722	2.83556	4.10228	2.00921	2.04174	0.0411776	0.542959		RCC1L	13.8528	-4.98137	2.28077	-2.18407	0.0289569	0.473029
RIOK3	4.89702	4.09832	1.64868	2.48581	0.0129256	0.302003		NET1	13.681	-4.98044	2.23833	-2.22507	0.0260764	0.446346
FEM1B	3.48848	4.08349	1.96365	2.07954	0.0375681	0.517999		KIAA1671-AS1	13.3192	-4.97987	2.33268	-2.13482	0.0327754	0.485209
TSPAN12	5.03966	4.08035	1.53032	2.66634	0.00766812	0.218212		TTYH1	13.6506	-4.97976	2.25057	-2.21267	0.0269205	0.455512
TNNT1	3.63113	4.05932	1.75334	2.31519	0.0206025	0.388439		LRRC37A	13.3982	-4.97889	2.23203	-2.23065	0.0257042	0.443393
GPR183	2.91612	4.05056	2.00092	2.02435	0.0429342	0.549851		OSBP	13.381	-4.97412	2.23038	-2.23017	0.0257363	0.443393
ALDOA	5.07664	4.04089	1.53594	2.63089	0.00851619	0.235636		BOP1	146.486	-4.97235	1.24995	-3.97802	6.94908e-05	0.00986294
GTF2A1	5.6675	4.03907	1.47678	2.73506	0.00623688	0.192099		DCPS	13.5443	-4.97219	2.23579	-2.22391	0.0261543	0.446676
MRPL32	5.6675	4.03907	1.47678	2.73506	0.00623688	0.192099		LOC107986578	13.763	-4.97041	2.34156	-2.12269	0.0337796	0.488985
NCR3LG1	3.52846	4.03526	1.96336	2.05529	0.0398512	0.533706		NSUN7	73.0376	-4.97009	1.60173	-3.10294	0.00191607	0.098549
UBASH3B	2.9376	4.02458	2.00099	2.0113	0.0442939	0.554943		IQGAP1	13.1257	-4.96725	2.27372	-2.18464	0.0289155	0.472976
TMEM202-AS1	3.52546	4.02299	1.90078	2.11649	0.0343032	0.492067		LOC112268195	13.3615	-4.96587	2.2234	-2.23346	0.0255188	0.442771
VRK1	3.52546	4.02299	1.90078	2.11649	0.0343032	0.492067		BRCA1	13.1238	-4.96431	2.38265	-2.08352	0.0372038	0.514926
CTNNA1-AS1	7.80291	4.01632	1.36581	2.94061	0.00327565	0.135429		LOC102723566	73.7136	-4.96401	1.64533	-3.01702	0.0025527	0.118802
SURF1	9.54032	4.00293	1.21684	3.28961	0.00100325	0.0639694		ASCC2	13.0313	-4.96259	2.28035	-2.17625	0.0295369	0.47565
STAG2-AS1	5.99636	3.99814	1.57034	2.54604	0.0108954	0.270326		LRRC37A16P	218.253	-4.95745	1.00832	-4.91657	8.80755e-07	0.00036593
ESD	2.95609	3.99682	1.9225	2.07897	0.0376199	0.517999		MMP24-AS1-EDEM2	13.0243	-4.95581	2.30121	-2.15357	0.0312741	0.485209
IGF1R	42.1236	3.99589	0.770172	5.18831	2.12208e-07	0.000131058		RAET1E-AS1	72.031	-4.95295	1.65542	-2.99196	0.00277191	0.124687
HMBS	13.795	3.97063	1.00782	3.93984	8.15368e-05	0.0110905		SLC12A7	13.0305	-4.95224	2.24926	-2.20172	0.027685	0.461911
TRB	4.29894	3.96531	1.64954	2.40389	0.0162218	0.343544		CARNS1	13.204	-4.95216	2.25001	-2.20095	0.0277394	0.461911
MCAT	3.58692	3.95728	1.91556	2.06585	0.0388422	0.527069		CKAP4	12.9444	-4.95074	2.26795	-2.18291	0.0290422	0.473693
CLASP2	2.97458	3.95624	2.0039	1.97427	0.0483508	0.579677		LPP	13.0941	-4.94698	2.24061	-2.20787	0.0272534	0.458592
RFX1	8.73989	3.92446	1.2334	3.18182	0.00146352	0.0827794		APC	12.8341	-4.93283	2.33608	-2.11158	0.0347224	0.495282
BCKDHB	2.87191	3.91444	1.97787	1.97911	0.0478032	0.576134		AP2M1	13.0638	-4.93243	2.28777	-2.156	0.0310837	0.485209
LOC101928994	4.52513	3.9133	1.69633	2.30692	0.0210592	0.394221		MECP2	12.8821	-4.93234	2.24565	-2.19639	0.0280639	0.464577
RCOR3	7.98428	3.90232	1.34392	2.90369	0.00368796	0.144041		VCP	13.1099	-4.93075	2.26368	-2.1782	0.0293912	0.474683
ENPP7P8	6.82468	3.87777	1.41016	2.74989	0.00596158	0.189179		MISP	12.9216	-4.92947	2.23116	-2.20938	0.0271485	0.457838
KMT2E-AS1	12.4156	3.87492	1.06612	3.6346	0.00027841	0.0264169		LINC00667	12.8691	-4.92648	2.2328	-2.20641	0.027355	0.458731
LOC102725168	6.86826	3.87356	1.44142	2.68733	0.00720267	0.208604		MAT2A	12.8529	-4.92518	2.24179	-2.19699	0.0280211	0.464577
GAS5-AS1	837.029	3.85114	0.562915	6.84142	7.84113e-12	4.6394e-08		LOC107985302	12.6961	-4.92424	2.33004	-2.11337	0.0345691	0.493712
HINT1	48.0709	3.83883	0.907307	4.23101	2.3264e-05	0.00425284		HFE-AS1	12.9046	-4.91551	2.23252	-2.20178	0.0276812	0.461911
MUL1	6.65632	3.83669	1.34702	2.84828	0.00439567	0.158269		PDZD7	70.7416	-4.90773	1.59195	-3.08285	0.00205029	0.10297
LOC100420885	2.93037	3.8317	1.95088	1.96409	0.0495198	0.58672		DLEU7	12.5716	-4.90489	2.31371	-2.11993	0.0340123	0.489922
RPL39P38	4.37526	3.82299	1.67777	2.27861	0.0226901	0.409875		NBEAP6	12.57	-4.90281	2.28707	-2.14371	0.0320564	0.485209
AP3M1	61.7138	3.82146	0.87983	4.34341	1.40286e-05	0.00299597		FBXW5	12.5228	-4.90014	2.26327	-2.16507	0.0303821	0.484587
PARP2	549.165	3.8092	0.897706	4.24326	2.20291e-05	0.00409258		TACC3	12.5043	-4.89786	2.2643	-2.16308	0.0305351	0.484587
RPL9	173.135	3.80339	0.664493	5.72374	1.04204e-08	1.08235e-05		MYH10	12.8219	-4.89728	2.23195	-2.19417	0.028223	0.465985
RPS20P14	13.7699	3.78929	1.23178	3.07627	0.00209605	0.104124		LOC105371755	279.129	-4.89556	0.921163	-5.31454	1.06926e-07	7.40414e-05
EPM2A	3.72234	3.78894	1.84244	2.05648	0.0397362	0.533706		LOC101929770	12.6025	-4.89535	2.26248	-2.16371	0.0304864	0.484587
HEATR6	4.41224	3.77982	1.62382	2.32774	0.0199262	0.3836		PRR7-AS1	12.6091	-4.89512	2.23678	-2.18847	0.0286357	0.47042
UQCRQ	19.2323	3.77423	0.958721	3.93673	8.25979e-05	0.0111683		WDR1	12.5642	-4.8932	2.25668	-2.16831	0.0301348	0.482558
IST1	33.5395	3.75601	0.946853	3.96683	7.2835e-05	0.0102108		KLHL32	13.0368	-4.8911	2.27903	-2.14614	0.0318621	0.485209
ZNF706	31.25	3.75011	0.888915	4.21875	2.45656e-05	0.00442007		YWHAG	12.556	-4.88985	2.24384	-2.17923	0.0293148	0.474683
ARHGAP17	5.16061	3.73715	1.56242	2.39191	0.016761	0.34961		LOC107984661	138.638	-4.88919	1.18949	-4.11031	3.95132e-05	0.00640365
IGF2BP2-AS1	9.41972	3.73346	1.599	2.33486	0.0195505	0.378922		RAD51	12.5417	-4.88832	2.24194	-2.18039	0.0292284	0.474683
PRDX5	35.6363	3.72901	0.792339	4.70633	2.52218e-06	0.000782364		ASMTL	12.5579	-4.88661	2.2325	-2.18885	0.0286074	0.470293
DMAC1	7.60878	3.7285	1.40929	2.64565	0.00815335	0.228324		MORF4L2	12.4948	-4.87446	2.23199	-2.18391	0.028969	0.473029
TRA	6.05824	3.72616	1.41057	2.64159	0.0082517	0.230606		CD44	12.7813	-4.87067	2.26975	-2.1459	0.0318809	0.485209
SNHG6	17.6228	3.72058	1.05325	3.53248	0.000411689	0.0348426		SPINT1-AS1	339.918	-4.8596	0.841065	-5.77792	7.56316e-09	8.64128e-06
FKBP3	15.4886	3.72031	1.06711	3.48634	0.000489669	0.03982		MIR3911	12.5519	-4.85791	2.24569	-2.16322	0.0305243	0.484587
FOXP4-AS1	4.52978	3.71088	1.73722	2.1361	0.0326713	0.485209		ACSL5	12.3672	-4.85554	2.27014	-2.13887	0.0324464	0.485209
DHDDS	32.433	3.70997	0.828289	4.47907	7.49686e-06	0.00181267		RAB5C	12.1759	-4.85426	2.25512	-2.15255	0.0313541	0.485209
NBPF3	3.0694	3.70585	1.86973	1.98202	0.0474766	0.573648		EZR-AS1	270.198	-4.85263	0.956653	-5.07251	3.92612e-07	0.000213609
RNF139-DT	3.0694	3.70585	1.86973	1.98202	0.0474766	0.573648		ZDHHC8	12.0942	-4.84307	2.25471	-2.14798	0.0317154	0.485209
LOC105375492	5.47099	3.70304	1.5374	2.40864	0.0160123	0.341876		ACTR1A	12.5685	-4.84101	2.27982	-2.12342	0.0337188	0.488901
LINC02482	13.0541	3.69362	1.0499	3.51807	0.000434704	0.0364875		CAPN2	11.9495	-4.83867	2.29895	-2.10473	0.0353146	0.499984
S100A4	26.2546	3.69213	0.978261	3.77417	0.000160538	0.0176368		TSPAN4	12.1254	-4.83802	2.24434	-2.15566	0.0311104	0.485209
SGTB	7.83199	3.68707	1.37269	2.68602	0.00723097	0.208894		FZD4	11.9679	-4.83544	2.3893	-2.02378	0.0429924	0.549851
UBL5	6.70031	3.66683	1.43935	2.54756	0.0108478	0.269438		MLF2	12.1924	-4.83527	2.28634	-2.11485	0.0344424	0.492649
MCMDC2	1123.85	3.66569	0.629102	5.82686	5.64814e-09	6.79293e-06		MTATP6P1	66.531	-4.83313	1.58581	-3.04774	0.00230566	0.109159
ATP6V0B	6.07311	3.665	1.39157	2.63371	0.00844572	0.234785		LOC102724262	12.1178	-4.83219	2.24373	-2.15364	0.0312681	0.485209
TIMM8A	4.82466	3.65444	1.79024	2.04131	0.0412204	0.543011		MED12	11.9144	-4.83123	2.30509	-2.09589	0.0360918	0.507216
RPL22P1	7.12359	3.65306	1.53717	2.37648	0.0174789	0.357575		FOXP4	11.9097	-4.82927	2.27062	-2.12685	0.0334326	0.486294
DEGS2	71.2036	3.63992	0.914946	3.97829	6.94133e-05	0.00986294		HEIH	12.1346	-4.82836	2.2398	-2.15571	0.0311063	0.485209
TINF2	8.3493	3.63939	1.26322	2.88103	0.00396377	0.149992		DNAJC5	11.969	-4.82662	2.24899	-2.14613	0.0318626	0.485209
MCUB	5.62023	3.63587	1.80154	2.0182	0.0435701	0.55359		PKN1	11.9977	-4.82658	2.2448	-2.15012	0.0315457	0.485209
PLK3	13.6853	3.6252	1.04233	3.47798	0.00050521	0.0409381		H3-3A	12.0217	-4.82243	2.25265	-2.14078	0.0322919	0.485209
PDF	5.25543	3.61774	1.55276	2.32988	0.0198127	0.382061		TNFRSF1A	12.2256	-4.82183	2.23942	-2.15316	0.0313057	0.485209
JMJD6	4.50643	3.59961	1.72654	2.08487	0.0370814	0.513588		MED1	11.9841	-4.82058	2.24211	-2.15002	0.0315539	0.485209
TDRD3	4.71177	3.59562	1.56121	2.3031	0.0212734	0.395867		HMG20B	11.8298	-4.82044	2.27331	-2.12045	0.0339682	0.489922
CREB5	8.48833	3.58965	1.21463	2.95535	0.0031231	0.133145		GON4L	12.0965	-4.81955	2.24503	-2.14677	0.0318118	0.485209
TRAPPC2L	12.321	3.58929	1.04281	3.44196	0.000577518	0.0441366		NT5C2	11.9299	-4.81124	2.23764	-2.15014	0.0315444	0.485209
RASL12	6.91991	3.58689	1.3247	2.7077	0.00677513	0.202377		SRC	11.7703	-4.80744	2.27245	-2.11553	0.0343845	0.492615
POLR2G	5.46314	3.57645	1.47051	2.43212	0.0150107	0.330772		SLAMF9	11.7691	-4.80535	2.34546	-2.04879	0.0404825	0.538454
RPS28P7	7.02856	3.5756	1.44872	2.46811	0.0135828	0.311314		INTS1	11.747	-4.80202	2.27731	-2.10864	0.0349758	0.497418
ZNF200	4.68968	3.57535	1.59986	2.23478	0.0254315	0.442392		TIGD7	11.8823	-4.80095	2.26055	-2.1238	0.033687	0.488753
LOC101927516	6.42346	3.57492	1.56003	2.29157	0.0219305	0.40284		LOC105378728	64.9869	-4.80015	1.59291	-3.01345	0.00258295	0.119169
MYG1	43.7803	3.56063	0.72384	4.91909	8.69475e-07	0.00036593		LOC102724149	11.6646	-4.79253	2.40807	-1.9902	0.0465692	0.570591
RPL7P9	15.1059	3.55642	1.23446	2.88096	0.00396461	0.149992		ANO1	11.492	-4.78063	2.3528	-2.03188	0.0421654	0.547117
EPC1	8.43751	3.542	1.28146	2.76404	0.00570909	0.184524		PROZ	11.5275	-4.78042	2.28914	-2.0883	0.0367709	0.511852
NSL1	4.898	3.53264	1.73457	2.03661	0.0416894	0.546869		PRPF40A	11.6729	-4.7771	2.24846	-2.12461	0.0336191	0.488385
OTUD3	3.8756	3.52777	1.76688	1.99661	0.045868	0.565446		ATP2C2	11.5593	-4.77517	2.26222	-2.11084	0.0347863	0.495373
SLC35G6	3.83202	3.52249	1.71434	2.05472	0.0399064	0.533706		HOXA10-AS	254.866	-4.76673	0.924978	-5.15335	2.55878e-07	0.000142924
LOC112267936	5.64575	3.51894	1.50015	2.34572	0.0189903	0.370809		RAB6B	11.6163	-4.76612	2.25117	-2.11718	0.0342449	0.492051
SPSB2	25.0756	3.51363	0.811727	4.32858	1.50074e-05	0.00314618		RET	11.4307	-4.76595	2.40014	-1.9857	0.0470672	0.57239
LOC101928214	5.64276	3.50273	1.58884	2.20458	0.0274836	0.459756		OAZ2	11.7067	-4.76068	2.24878	-2.11701	0.034259	0.492051
LOC107986514	14.5622	3.49305	1.3516	2.58439	0.00975517	0.259163		CC2D2B	11.6057	-4.75915	2.24272	-2.12204	0.0338342	0.489022
TUBA4B	8.95622	3.48423	1.29342	2.69381	0.00706406	0.206685		ATP5PF	11.3676	-4.75834	2.34657	-2.02779	0.042582	0.54881
SNHG3	4.78511	3.46948	1.64372	2.11075	0.0347938	0.495373		SETD2	11.3628	-4.75753	2.40056	-1.98185	0.0474965	0.573648
RN7SL738P	3.89049	3.46821	1.71904	2.01753	0.0436401	0.55359		GRIN1	11.9564	-4.75741	2.35002	-2.02441	0.0429276	0.549851
TRIM80P	5.51736	3.46592	1.57802	2.19638	0.028065	0.464577		IL3RA	11.8497	-4.75604	2.27954	-2.08641	0.0369419	0.512543
RPS14	711.1	3.4483	0.857082	4.0233	5.73892e-05	0.00857124		MTND4P12	11.2924	-4.75381	2.31672	-2.05196	0.040174	0.535448
UBN2	4.68182	3.44766	1.64208	2.09956	0.0357672	0.504516		TMEM204	11.3714	-4.75277	2.28512	-2.07988	0.0375368	0.517967
RPS2P5	33.8149	3.44598	0.983619	3.50337	0.000459416	0.0378994		KLF3	11.3004	-4.74757	2.27145	-2.09011	0.0366083	0.511018
NDUFA13	15.6776	3.43569	1.07649	3.19157	0.001415	0.0812416		CYTH2	11.2424	-4.74612	2.27398	-2.08714	0.0368751	0.511928
HAS2	6.57312	3.42455	1.40255	2.44166	0.01462	0.326889		RILPL1	11.6609	-4.74584	2.25707	-2.10266	0.0354959	0.501928
METTL2B	4.90865	3.40738	1.72639	1.9737	0.0484156	0.580139		YTHDF2	11.4128	-4.74518	2.24647	-2.11228	0.0346622	0.494731
LOC107984974	321.937	3.40667	0.675272	5.04488	4.53798e-07	0.000230439		RHOB	11.1946	-4.74366	2.29012	-2.07136	0.0383249	0.522532
SNHG7	12.0862	3.4026	1.15442	2.94745	0.0032041	0.134838		MEX3D	11.2172	-4.74233	2.3753	-1.99652	0.0458771	0.565446
NAA16	4.01102	3.39668	1.6353	2.07711	0.0377917	0.51953		BHLHE41	11.2568	-4.74162	2.26495	-2.09348	0.0363064	0.508667
OVOL1-AS1	11.0912	3.38403	1.18866	2.84693	0.00441434	0.158604		DGKQ	11.1994	-4.74036	2.28956	-2.07043	0.0384124	0.523257
SMIM6	7.31726	3.3825	1.42826	2.36827	0.0178714	0.361182		TMEM266	11.2455	-4.73724	2.31513	-2.04621	0.0407358	0.539938
SNAP23	5.56921	3.38216	1.42179	2.37881	0.0173685	0.356532		FZR1	11.2211	-4.73466	2.26748	-2.08807	0.0367911	0.511852
LAMTOR4	13.4969	3.37214	1.05794	3.18745	0.00143533	0.0817924		POMZP3	11.2953	-4.73329	2.26049	-2.09392	0.036267	0.508667
LOC148696	4.94561	3.37105	1.63701	2.05927	0.0394686	0.532092		CFAP126	62.4968	-4.73101	1.61151	-2.93576	0.00332735	0.135429
IKBKG	5.5501	3.37098	1.55889	2.16242	0.0305856	0.484681		PDGFRA	11.1374	-4.72654	2.40893	-1.96209	0.0497516	0.587478
NDUFB2	9.68527	3.36711	1.16107	2.9	0.00373167	0.144041		FTX	11.0162	-4.72118	2.31292	-2.04122	0.041229	0.543011
MYG1-AS1	2226.86	3.36153	0.550762	6.10342	1.03824e-09	2.15679e-06		ATE1-AS1	11.0378	-4.71843	2.30042	-2.05112	0.0402557	0.536062
RAB26	19.5544	3.35867	0.914965	3.67081	0.00024178	0.023918		MACF1	11.0702	-4.71512	2.28144	-2.06673	0.0387591	0.526254
ADCK2	6.35395	3.35708	1.41473	2.37295	0.0176467	0.359638		LOC105376615	11.1965	-4.71238	2.25304	-2.09156	0.0364779	0.509588
GPR108	4.73367	3.35441	1.58287	2.1192	0.0340735	0.490311		LOC112268024	10.9817	-4.71191	2.3143	-2.036	0.0417505	0.547117
PET100	13.9673	3.35198	1.12369	2.98301	0.00285428	0.126488		LOC105371792	61.1	-4.70674	1.58986	-2.96048	0.00307162	0.131921
DHDDS-AS1	4.85782	3.33683	1.51936	2.19621	0.0280767	0.464577		CCDC102A	10.9144	-4.70379	2.29213	-2.05215	0.0401556	0.535448
LINC02939	14.6636	3.33609	1.00471	3.32044	0.000898753	0.0593042		TJP3	10.9826	-4.70136	2.26128	-2.07907	0.0376107	0.517999
METTL21A	14.0473	3.33595	1.06563	3.1305	0.0017451	0.0931712		ERRFI1	10.8498	-4.70027	2.31755	-2.02812	0.0425483	0.54881
TSPO	12.872	3.33387	1.07536	3.10024	0.00193363	0.0988486		HLA-J	10.9103	-4.69836	2.30799	-2.03569	0.0417817	0.547117
MOB1B	5.56498	3.33114	1.51096	2.20464	0.0274791	0.459756		SECISBP2	10.9307	-4.69648	2.26127	-2.07692	0.0378092	0.51953
ESRRA	245.947	3.30856	0.916335	3.61064	0.000305437	0.0281433		HNRNPR	11.2177	-4.69344	2.26412	-2.07296	0.0381756	0.522387
IFITM9P	4.91928	3.29511	1.56638	2.10365	0.0354091	0.501012		CTNNB1	11.0713	-4.69297	2.24765	-2.08795	0.0368024	0.511852
CFAP97	4.08735	3.27538	1.61581	2.02709	0.0426534	0.549092		BHLHE40-AS1	11.097	-4.69225	2.25034	-2.08513	0.0370571	0.513588
NUDCD2	14.9381	3.2707	0.976816	3.34833	0.000813015	0.0554573		SLC26A10	11.1998	-4.68906	2.25671	-2.07783	0.0377254	0.519002
GPAA1	6.72577	3.26645	1.40844	2.3192	0.020384	0.385538		NOTCH2	10.7926	-4.68853	2.34887	-1.99608	0.0459256	0.565496
LIMS1	4.2115	3.25991	1.64892	1.977	0.0480417	0.577486		TFAP2A-AS2	10.7975	-4.68546	2.34979	-1.99399	0.0461532	0.566709
HMGA2-AS1	24.4341	3.25421	1.12211	2.90008	0.0037307	0.144041		ZNF839	10.8772	-4.68178	2.25559	-2.07563	0.0379279	0.520812
IDH3G	41.5037	3.24458	0.724508	4.47832	7.52323e-06	0.00181267		DDX21	10.8066	-4.67975	2.29082	-2.04282	0.0410699	0.542479
IGFBP7-AS1	21.1387	3.24118	1.29812	2.49683	0.0125309	0.297038		FBXW7-AS1	10.8761	-4.67678	2.27031	-2.05997	0.0394015	0.531762
RABAC1	11.4444	3.24117	1.08562	2.98554	0.00283079	0.126094		UBAP1	10.7774	-4.67594	2.27308	-2.05709	0.0396774	0.533706
USP45	4.93415	3.23996	1.48667	2.17934	0.0293063	0.474683		LOC102724723	10.8104	-4.67291	2.25936	-2.06825	0.0386166	0.524942
CD2AP	13.27	3.23883	1.03218	3.13784	0.00170196	0.091725		LOC107986458	10.9628	-4.67272	2.25305	-2.07395	0.0380841	0.521738
CTSW	4.93116	3.23854	1.53124	2.11498	0.0344316	0.492649		SEMA3B	10.6536	-4.67271	2.35114	-1.98743	0.0468751	0.571581
LOC101928034	2330.66	3.23818	0.801918	4.03805	5.38982e-05	0.00810281		AGRN	59.3285	-4.67052	1.61877	-2.88523	0.00391128	0.148713
ZSCAN31	10.7557	3.23048	1.13993	2.83393	0.00459789	0.162642		CKAP5	10.8486	-4.66947	2.30761	-2.02351	0.0430206	0.549851
CKAP2L	5.05831	3.22483	1.51487	2.12878	0.0332723	0.485281		TMEM87A	10.7734	-4.66835	2.25375	-2.07137	0.0383242	0.522532
LOC107987063	62.7758	3.2231	0.692613	4.65354	3.26289e-06	0.000943802		UPF1	10.8559	-4.6675	2.24993	-2.07451	0.0380321	0.521339
CLK1	8.20743	3.22138	1.28885	2.49943	0.0124393	0.296685		LOC105373062	11.082	-4.66747	2.33071	-2.00259	0.0452209	0.559774
ZMYM2	6.54719	3.21196	1.34931	2.38045	0.0172916	0.355872		LOC105372141	10.7525	-4.66407	2.26543	-2.0588	0.0395135	0.532384
NME1	8.56563	3.20993	1.28503	2.49794	0.0124918	0.296725		KDM4A-AS1	119.035	-4.66362	1.19235	-3.91128	9.18073e-05	0.0118784
PCNP	2145.04	3.2016	0.539752	5.9316	2.99988e-09	4.52717e-06		ASB16	59.1745	-4.66199	1.57196	-2.96572	0.00301977	0.130444
SAT1	9.17839	3.19143	1.16625	2.73648	0.00621008	0.192099		UBE2E1	10.6002	-4.65874	2.28163	-2.04185	0.0411668	0.542959
FOXO3	12.4253	3.17233	1.10974	2.85862	0.00425487	0.155814		SAP30L-AS1	10.6918	-4.65189	2.28837	-2.03284	0.042069	0.547117
RUNDC3A	6.81399	3.17231	1.32177	2.40005	0.0163929	0.345247		CHD7	10.7934	-4.65152	2.25728	-2.06068	0.0393339	0.531762
RPS9	139.711	3.16359	0.744157	4.25123	2.12596e-05	0.00398199		OPA1-AS1	10.8359	-4.65006	2.26328	-2.05457	0.0399204	0.533706
RPL22	76.2363	3.15675	0.993823	3.17637	0.00149131	0.0839358		SH3BP5	10.51	-4.64878	2.3165	-2.00681	0.0447695	0.556857
LOC105371168	6.17912	3.15255	1.59052	1.98209	0.0474692	0.573648		B4GALT1-AS1	58.2714	-4.64218	1.61938	-2.86664	0.00414853	0.154328
TUBGCP6	14.2401	3.14933	1.03041	3.05638	0.00224027	0.108001		CXCR5	643.777	-4.64097	0.710072	-6.53592	6.32193e-11	2.40771e-07
ACOT13	134.479	3.1493	0.682785	4.61243	3.97992e-06	0.00109572		CUL4A	58.3155	-4.63886	1.57557	-2.94425	0.00323739	0.135429
MFSD8	7.78495	3.13082	1.3572	2.30683	0.0210644	0.394221		FUT4	10.5432	-4.63848	2.25784	-2.05438	0.0399386	0.533706
ADIRF-AS1	17.7085	3.13009	0.91869	3.40713	0.000656507	0.0491863		LOC107985139	116.331	-4.63802	1.33445	-3.4756	0.000509714	0.0411571
CABLES2	9.17943	3.12425	1.197	2.61006	0.00905255	0.246262		TUBB8P1	10.4241	-4.63558	2.35793	-1.96595	0.0493041	0.586123
ACYP2	12.5046	3.12374	1.10145	2.83602	0.00456798	0.162085		FGFR1	10.4033	-4.63181	2.32165	-1.99505	0.046037	0.565892
IGSF6	10.5039	3.12231	1.23928	2.51946	0.0117534	0.284811		ZBTB17	58.6724	-4.6315	1.61475	-2.86825	0.00412743	0.15386
PRDX3P2	6.02502	3.12101	1.4338	2.17674	0.0295002	0.475395		TNFRSF21	10.3064	-4.62929	2.3407	-1.97774	0.047958	0.577486
GMIP	5.87215	3.10017	1.39978	2.21476	0.0267767	0.453671		LOC100422274	10.4692	-4.62821	2.28579	-2.02477	0.0428908	0.549851
RPS3A	130.265	3.09438	0.659646	4.69097	2.71916e-06	0.000817572		NUCB1	10.4848	-4.62573	2.30213	-2.00933	0.0445026	0.554943
PFDN5	35.1312	3.09392	0.809702	3.82106	0.000132878	0.0157326		PLXNA1	10.2373	-4.61802	2.32241	-1.98846	0.0467609	0.571075
UPK3B	5.86855	3.08491	1.45254	2.1238	0.0336872	0.488753		MROH8	344.845	-4.61629	0.809487	-5.70273	1.17902e-08	1.17138e-05
NDUFA1	5.9993	3.08464	1.43185	2.15431	0.031216	0.485209		EP300	10.229	-4.61425	2.34721	-1.96585	0.0493163	0.586123
SGF29	10.9524	3.08166	1.10714	2.78343	0.00537867	0.179297		AVL9	10.3499	-4.61262	2.26087	-2.0402	0.0413305	0.543721
VPS29	11.1207	3.07858	1.07198	2.87186	0.0040807	0.153117		IGSF3P2	10.5598	-4.61137	2.27397	-2.02789	0.0425715	0.54881
FSIP1	5.93361	3.07085	1.41778	2.16595	0.0303151	0.484587		LOC105373211	10.7117	-4.60897	2.30084	-2.00317	0.0451594	0.559316
RPL35A	57.9554	3.06861	0.720859	4.25688	2.07304e-05	0.00391496		STPG3	10.186	-4.60875	2.35046	-1.96079	0.0499039	0.588526
LOC105372581	5.27066	3.06048	1.53367	1.99552	0.0459859	0.565872		LOC107984638	113.872	-4.60658	1.21981	-3.77648	0.000159058	0.0175943
LOC105379839	10.6572	3.05206	1.22895	2.48347	0.0130109	0.303071		XRN2	10.3901	-4.60492	2.25682	-2.04045	0.0413055	0.543705
FBXO24	6.86098	3.04975	1.29749	2.35049	0.0187485	0.368376		LOC102723786	56.4971	-4.599	1.63389	-2.81476	0.00488132	0.167986
FLJ46875	5.20797	3.04954	1.44876	2.10494	0.0352969	0.499984		SNRPA	10.4399	-4.59535	2.26278	-2.03084	0.0422713	0.547117
TRIP6	12.2845	3.04547	1.14798	2.65289	0.00798047	0.224583		GID8	10.3861	-4.59532	2.25575	-2.03716	0.0416342	0.546458
LOC105375724	69.753	3.03704	0.901355	3.36942	0.000753269	0.0532909		FHIP2B	10.4632	-4.59481	2.28585	-2.01011	0.0444192	0.554943
PCP2	18.4054	3.01255	0.904487	3.33067	0.000866369	0.0585722		HORMAD2-AS1	10.2696	-4.59204	2.27501	-2.01847	0.0435427	0.55359
GDF9	183.95	3.0053	0.612807	4.90415	9.38339e-07	0.000376175		LIPT2	10.1583	-4.5919	2.28973	-2.00543	0.0449171	0.557353
PSMG3-AS1	8.60282	3.00323	1.27172	2.36155	0.0181988	0.363421		TFDP1	10.0631	-4.59159	2.33577	-1.96578	0.0493245	0.586123
LOC100421419	7.02148	2.99348	1.30012	2.30246	0.0213095	0.396211		LOC105371430	10.5327	-4.5859	2.29126	-2.00148	0.0453408	0.560347
NRP1	13.1012	2.96512	1.08774	2.72595	0.0064117	0.195507		LOC105376018	10.3648	-4.58162	2.27987	-2.00959	0.0444745	0.554943
GLS	16.767	2.94839	0.924192	3.19024	0.00142156	0.0814135		PPM1N	10.1484	-4.58049	2.27597	-2.01254	0.0441626	0.554943
RPS12P29	8.0664	2.94824	1.28223	2.2993	0.0214878	0.397908		NDST1-AS1	10.1496	-4.57697	2.2731	-2.01353	0.0440584	0.554943
ITCH	6.14297	2.94804	1.41118	2.08906	0.0367026	0.511582		LRRC37A17P	55.9422	-4.57657	1.59943	-2.86137	0.00421814	0.155814
RPL13AP25	10.3864	2.94184	1.1632	2.52909	0.0114359	0.280087		STMN1	10.1658	-4.57327	2.28062	-2.00527	0.0449338	0.557353
SMPD4	49.9127	2.9403	0.763617	3.85049	0.000117883	0.0142526		PACSIN2	9.94881	-4.57141	2.30449	-1.9837	0.0472894	0.573536
USP48	6.16745	2.93923	1.36291	2.15658	0.0310383	0.485209		BAP1	9.96557	-4.57134	2.30059	-1.98703	0.0469195	0.571699
LINC00910	5.27706	2.91922	1.45196	2.01054	0.0443746	0.554943		CAMK2N1	10.1981	-4.57098	2.27782	-2.00673	0.0447784	0.556857
LOC107984763	6.45997	2.90929	1.44798	2.00921	0.0445149	0.554943		USP7	10.1193	-4.57031	2.25894	-2.02321	0.0430515	0.549851
SCAND1	111.073	2.90401	0.614029	4.72944	2.25143e-06	0.000734963		LOC105374296	10.02	-4.56992	2.31943	-1.97027	0.0488069	0.582699
EEF1B2	83.0403	2.89475	0.691973	4.18333	2.87272e-05	0.00493834		RAB7A	9.99084	-4.55999	2.30642	-1.97708	0.0480321	0.577486
FUNDC2	6.13811	2.89005	1.41163	2.04732	0.0406269	0.538884		PKP4-AS1	165.301	-4.55715	1.06105	-4.29493	1.7475e-05	0.00356536
TOB2	15.9343	2.88719	1.06008	2.72355	0.00645836	0.195926		RPN2	9.82889	-4.55587	2.30708	-1.97474	0.0482978	0.579523
SFN	11.6384	2.87541	1.05437	2.72712	0.00638891	0.195178		ARPC4	9.99934	-4.55527	2.26172	-2.01407	0.0440021	0.554943
RPL35	247.964	2.87177	0.744113	3.85932	0.000113704	0.013959		BAZ1A	9.95813	-4.55394	2.2653	-2.0103	0.0443994	0.554943
UCN	6.32136	2.86118	1.34126	2.1332	0.032908	0.485209		RLIMP2	10.0896	-4.55336	2.29456	-1.98441	0.0472098	0.573215
LOC102725180	10.8286	2.85055	1.0857	2.62555	0.00865099	0.237887		COQ4	9.95339	-4.54973	2.28086	-1.99475	0.0460706	0.566
ZFAS1	30.6554	2.84662	0.811425	3.50817	0.000451194	0.0373559		HOXA7	10.0599	-4.54468	2.28734	-1.98689	0.0469348	0.571699
PCNX3	73.9514	2.84055	0.640064	4.43792	9.08332e-06	0.00213982		DDN	9.93262	-4.54169	2.26642	-2.0039	0.0450803	0.558638
MIF-AS1	12527.2	2.83859	0.524128	5.41582	6.1007e-08	4.97882e-05		MGA	9.78617	-4.53963	2.31199	-1.96351	0.0495865	0.587098
CHCHD2	57.6959	2.83625	0.733766	3.86533	0.000110939	0.0137226		LOC100130548	9.84247	-4.53473	2.28326	-1.98608	0.0470248	0.572185
RPL21	54.9735	2.83615	0.770192	3.68239	0.000231057	0.0236149		CLPTM1L	10.1163	-4.5339	2.28581	-1.9835	0.0473115	0.573536
LRRC75A	4943.35	2.83589	0.570072	4.97461	6.53795e-07	0.000298797		TMPO-AS1	325.285	-4.53237	0.941441	-4.81429	1.47726e-06	0.000554046
CAMTA1	7.41285	2.82692	1.328	2.12871	0.033278	0.485281		PEX1	9.76126	-4.52826	2.26863	-1.99603	0.0459306	0.565496
TMEM243	9.20426	2.82507	1.16792	2.41888	0.0155682	0.338808		LOC643327	9.84204	-4.52313	2.26506	-1.99692	0.0458343	0.565446
MPPE1	7.39074	2.82331	1.26607	2.22999	0.025748	0.443393		CCT6A	9.65558	-4.51734	2.2904	-1.97229	0.0485765	0.580555
COX7C	6.35771	2.82023	1.3232	2.13136	0.0330594	0.485209		LOC107987244	53.5632	-4.51542	1.57908	-2.85953	0.0042427	0.155814
SLC35C2	6.31711	2.81874	1.36847	2.05977	0.0394208	0.531762		CYP3A5	9.66282	-4.51509	2.27334	-1.9861	0.0470219	0.572185
SNHG32	6.31412	2.81868	1.39068	2.02683	0.04268	0.549092		MRPS25	214.258	-4.51452	0.940089	-4.80223	1.56908e-06	0.000563813
NDUFS6	8.16761	2.81063	1.24345	2.26035	0.0237997	0.422241		C11orf65	9.67669	-4.50987	2.28613	-1.97271	0.0485291	0.580356
XYLT2	14.1464	2.79946	1.35445	2.06686	0.0387476	0.526254		LOC105370792	106.414	-4.49921	1.18714	-3.78997	0.000150666	0.0171288
MTMR11	5.49242	2.79256	1.42091	1.96533	0.0493763	0.586129		LOC105375957	9.67327	-4.49791	2.26922	-1.98214	0.0474632	0.573648
ZNF593	10.1195	2.77546	1.14829	2.41703	0.0156477	0.339892		ITGB1BP1	265.27	-4.49679	0.890227	-5.05129	4.38839e-07	0.000227907
MRPL38	8.15676	2.77535	1.30515	2.12647	0.0334646	0.48645		YEATS2-AS1	52.9683	-4.49379	1.58946	-2.82725	0.00469498	0.164673
FBXL20	8.35024	2.77438	1.24168	2.23438	0.0254582	0.442392		CLN5	9.65241	-4.49326	2.26993	-1.97947	0.0477627	0.576104
COX5B	16.3744	2.76667	0.996657	2.77595	0.00550411	0.18097		LOC105373511	53.3882	-4.49211	1.62934	-2.75701	0.0058333	0.187742
ZPR1	10.0472	2.76328	1.17609	2.34955	0.018796	0.368676		LAPTM4B	9.49106	-4.48994	2.27513	-1.97349	0.0484401	0.580139
MRPL51	7.24851	2.76152	1.3007	2.1231	0.0337455	0.488978		CACNB2	9.68835	-4.48827	2.27179	-1.97565	0.0481943	0.579016
POLR2A	14.7556	2.75803	0.955251	2.88723	0.0038865	0.148264		EIF2A	9.73916	-4.48818	2.27715	-1.97097	0.0487278	0.58206
UXT	9.09839	2.75653	1.18312	2.32987	0.0198128	0.382061		SAE1	9.56883	-4.48426	2.27743	-1.969	0.0489531	0.583716
HSD17B10	12.2005	2.7561	1.11407	2.4739	0.0133646	0.307754		ZNF710-AS1	156.722	-4.47851	1.01606	-4.40772	1.04466e-05	0.00243587
SPEN-AS1	38.8311	2.75607	0.78483	3.51168	0.000445284	0.0370007		LOC107987169	9.5612	-4.4759	2.26897	-1.97266	0.0485344	0.580356
LOC101927330	45.7449	2.75299	0.75174	3.66216	0.000250097	0.024319		FAN1	103.538	-4.46832	1.29615	-3.44737	0.000566078	0.0440908
RPSA	38.6928	2.7493	0.796622	3.45119	0.000558112	0.0438262		POLR1C	51.828	-4.46531	1.58929	-2.80963	0.0049599	0.169923
ZKSCAN2	7.39776	2.74783	1.27882	2.14872	0.0316563	0.485209		MRPL43	259.218	-4.46391	0.845737	-5.27813	1.30507e-07	8.52063e-05
TRIM7	19.5993	2.73198	0.869785	3.14098	0.00168382	0.0909619		LOC107984219	155.142	-4.46385	1.11291	-4.01096	6.04715e-05	0.0088579
C15orf61	41.8784	2.73035	0.741721	3.68111	0.000232223	0.0236149		SSTR5	51.6198	-4.45642	1.58111	-2.81854	0.00482421	0.167535
LONP1	118.101	2.712	0.605633	4.47796	7.53592e-06	0.00181267		LOC105371050	51.9791	-4.45296	1.62245	-2.74458	0.00605875	0.1907
CYP20A1	29.0312	2.71025	0.795169	3.40839	0.000653472	0.04912		COMMD5	51.1112	-4.45139	1.59976	-2.78254	0.00539351	0.179297
SLC12A2-DT	18.8803	2.70801	0.947262	2.85877	0.00425286	0.155814		LOC107985219	102.629	-4.44244	1.20601	-3.6836	0.000229962	0.0236149
MIR302CHG	129.609	2.69883	0.587528	4.59353	4.35806e-06	0.0011716		CARHSP1	50.513	-4.43124	1.63036	-2.71796	0.00656868	0.197761
LIPG	11.2514	2.69746	1.064	2.5352	0.0112384	0.276138		STAG3	50.3471	-4.42664	1.60206	-2.7631	0.00572549	0.184793
REX1BD	8.41271	2.69054	1.22719	2.19245	0.0283473	0.4677		DNAJB13	49.7426	-4.39935	1.57539	-2.79255	0.00522946	0.175992
METTL5	140.896	2.68689	0.844728	3.18077	0.00146883	0.0828746		HOXA10	97.8587	-4.37906	1.17585	-3.72417	0.000195956	0.0211217
STK16	45.7519	2.68648	0.968278	2.7745	0.00552871	0.181398		FERP1	48.3984	-4.36343	1.587	-2.74948	0.00596901	0.189179
VHL	9.24506	2.68454	1.19194	2.25224	0.0243069	0.429572		SLC7A6OS	433.833	-4.35948	0.748154	-5.82698	5.64379e-09	6.79293e-06
RNF181	17.7166	2.66279	0.989982	2.68974	0.00715078	0.207914		LOC400541	46.977	-4.33088	1.62972	-2.65744	0.00787367	0.222675
COA6	11.6245	2.65436	1.15557	2.297	0.0216187	0.400007		LOC107984247	184.543	-4.29131	0.936421	-4.58267	4.59081e-06	0.00121982
RPL30	51.8833	2.64912	0.900271	2.94258	0.00325486	0.135429		LOC101927179	45.4544	-4.28422	1.68308	-2.54546	0.0109134	0.27048
RPL18A	171.675	2.64909	0.677623	3.90939	9.25277e-05	0.0118784		RBM4B	45.2562	-4.2665	1.58223	-2.69651	0.00700702	0.205542
C12orf29	12.5028	2.64603	1.08695	2.43437	0.0149177	0.32981		PLCG1-AS1	267.842	-4.2467	0.824001	-5.15375	2.55323e-07	0.000142924
SRP9	12.6503	2.63952	1.1438	2.30769	0.0210165	0.394121		XRCC3	44.5581	-4.2465	1.58463	-2.6798	0.00736664	0.212009
UXT-AS1	774.291	2.63297	0.546935	4.81405	1.47901e-06	0.000554046		RBM5-AS1	44.4099	-4.23939	1.60934	-2.63424	0.00843258	0.234705
SMG1P3	9.44493	2.62518	1.18813	2.2095	0.0271401	0.457838		AGK	741.816	-4.21409	0.685118	-6.1509	7.70449e-10	1.76055e-06
COG8	32.7725	2.62107	0.796015	3.29274	0.000992151	0.063506		SRRM2	43.0923	-4.20764	1.62507	-2.5892	0.00961988	0.25669
PRRC2C	27.6963	2.60886	0.800752	3.25801	0.00112196	0.0683675		PTOV1-AS1	256.406	-4.18012	0.851387	-4.90977	9.11814e-07	0.000372069
HAX1	12.591	2.60779	1.06519	2.44819	0.0143574	0.323549		TMEM139-AS1	84.8035	-4.17694	1.24555	-3.35349	0.000798004	0.0549253
LOC105374809	300.098	2.60415	0.566125	4.59996	4.22563e-06	0.00114952		SLC7A11-AS1	83.0433	-4.14585	1.3111	-3.16211	0.00156629	0.0862439
TMEM141	13.2369	2.60289	1.16595	2.23242	0.0255875	0.442885		MIR196B	41.8619	-4.14381	1.59547	-2.59723	0.00939787	0.252363
LOC105372411	29.8846	2.5935	0.785127	3.30329	0.000955589	0.0620345		TBCE	166.238	-4.14358	0.944371	-4.38766	1.14576e-05	0.00254192
SS18L1	9.64303	2.58158	1.12527	2.29419	0.0217795	0.401681		HOXA11-AS	40.1801	-4.09363	1.58636	-2.58052	0.00986503	0.260805
TAF12	12.8399	2.58142	1.11139	2.32269	0.0201959	0.385222		LOC105373975	39.9623	-4.09138	1.59913	-2.5585	0.0105124	0.265435
CUEDC2	9.81737	2.57172	1.1686	2.20068	0.0277586	0.461911		SPATA6L	39.253	-4.07084	1.63447	-2.49062	0.0127521	0.299793
MYADM	10.0808	2.56641	1.26634	2.02663	0.0427	0.549092		TATDN2P2	39.25	-4.06995	1.72996	-2.35263	0.0186413	0.367217
LIF	8.65657	2.55899	1.19346	2.14418	0.0320182	0.485209		HSP90B1	39.6704	-4.05903	1.65893	-2.44678	0.0144139	0.323549
KDELR3	15.1288	2.54824	1.26255	2.01833	0.0435566	0.55359		LOC112268190	39.2037	-4.05259	1.59613	-2.53901	0.0111166	0.274103
DNAJC17	1852.34	2.547	0.536008	4.7518	2.01618e-06	0.000687638		LOC112268166	77.7746	-4.04622	1.18949	-3.40165	0.000669798	0.0498553
VSIG10L	36.7763	2.54328	0.863232	2.94623	0.0032167	0.135119		ADD3-AS1	77.1336	-4.03995	1.38078	-2.92584	0.00343527	0.137477
UQCRH	31.6194	2.53734	0.860655	2.94815	0.00319686	0.134781		KRTAP5-1	38.2293	-4.0336	1.65728	-2.43387	0.0149382	0.32981
FHOD1	15.7307	2.52389	0.934594	2.70052	0.00692315	0.204358		SNHG22	77.1635	-4.03174	1.18829	-3.39288	0.000691622	0.0511464
IDH3B	7.7698	2.51977	1.26417	1.99321	0.0462384	0.567146		CENPP	154.324	-4.03073	0.933023	-4.32008	1.55975e-05	0.00324016
RAB3GAP2	14.2745	2.50393	1.13838	2.19956	0.0278382	0.461968		LONP2	230.598	-4.03005	0.899901	-4.47832	7.52322e-06	0.00181267
TAF5	108.628	2.49819	0.75095	3.3267	0.000878809	0.0588905		PTPRK-AS1	112.34	-3.99427	1.09592	-3.64468	0.000267721	0.0257046
RPS13	56.4683	2.49691	0.724744	3.44523	0.000570581	0.0440908		GET4	111.791	-3.98714	1.18875	-3.35406	0.000796359	0.0549253
NFS1	14.9777	2.49518	0.975801	2.55706	0.0105561	0.265657		DXO	36.5082	-3.96614	1.7221	-2.30309	0.0212737	0.395867
MRPL55	7.88735	2.48953	1.22105	2.03884	0.0414663	0.544951		C11orf42	73.3666	-3.96032	1.20002	-3.3002	0.000966145	0.0623778
RPLP0P6	17.73	2.48448	0.961621	2.58364	0.00977632	0.259163		FOXQ1	36.0709	-3.95143	1.69009	-2.338	0.0193871	0.376585
LOC105375489	699.363	2.47836	0.641235	3.86498	0.000111097	0.0137226		SNTB1	109.24	-3.94965	1.03678	-3.80955	0.00013922	0.0160672
S100P	84.2684	2.4758	0.874489	2.83115	0.00463816	0.163559		CTTN	35.9052	-3.94319	1.62777	-2.42245	0.0154163	0.336142
MUC12-AS1	52.0124	2.46103	0.670776	3.66894	0.000243562	0.023918		ARAP1-AS2	143.535	-3.92744	0.915732	-4.28885	1.79597e-05	0.00358726
ZNF593OS	1123.59	2.45557	0.564521	4.34983	1.3624e-05	0.002937		HIF1A-AS1	35.5563	-3.92473	1.75095	-2.24148	0.0249949	0.437335
VSIG10	30.0072	2.44373	0.811551	3.01118	0.00260231	0.119169		LOC101928059	35.7863	-3.92414	1.59205	-2.46483	0.0137078	0.312506
ATOX1-AS1	9.35428	2.44035	1.23417	1.97731	0.0480063	0.577486		EHBP1-AS1	106.638	-3.91713	1.06421	-3.68078	0.000232522	0.0236149
ZNF335	23.9756	2.43956	0.84653	2.88184	0.00395364	0.149992		ACO2	213.111	-3.90997	0.831117	-4.70448	2.54519e-06	0.000782364
TAPBPL	26.1197	2.43608	0.863785	2.82024	0.00479874	0.166904		HDLBP	106.079	-3.90919	1.01356	-3.85688	0.000114844	0.013959
DNLZ	19.0911	2.43547	0.900605	2.70426	0.00684558	0.203418		IPO9-AS1	70.5302	-3.9079	1.21426	-3.21833	0.00128941	0.07555
DELE1	8.08783	2.43444	1.20281	2.02397	0.0429733	0.549851		LOC112268267	69.4151	-3.87543	1.2005	-3.22818	0.00124579	0.07375
LOC107986696	72.4937	2.42798	1.1265	2.15533	0.0311363	0.485209		SIK2	34.597	-3.87527	1.61026	-2.40661	0.0161011	0.341876
MRPL20-AS1	182.594	2.41401	0.892317	2.70533	0.00682363	0.20334		NPB	69.3491	-3.87302	1.18563	-3.26664	0.00108832	0.0675794
OR7E126P	27.5006	2.40924	0.782537	3.07875	0.00207868	0.103712		LOC105372859	103.094	-3.85447	1.09112	-3.53258	0.000411529	0.0348426
RPS20	72.2546	2.39254	0.792298	3.01974	0.0025299	0.117981		LOC101929240	67.2337	-3.83908	1.269	-3.02528	0.00248402	0.116316
PTGES3	74.4392	2.38256	0.857035	2.78001	0.00543578	0.179758		LOC107986003	202.553	-3.83693	0.828359	-4.63196	3.62213e-06	0.00102184
GRHL2	26.5174	2.38109	0.821047	2.90007	0.00373077	0.144041		H1-0	66.7527	-3.82676	1.22339	-3.12799	0.00176005	0.0935324
INO80	20.3905	2.3794	0.894949	2.6587	0.00784439	0.222122		SHH	32.9649	-3.81875	1.66068	-2.2995	0.0214764	0.397908
RPL39	29.4843	2.37362	0.972994	2.4395	0.0147075	0.327565		LOC100129931	695.56	-3.80914	0.634924	-5.99936	1.98096e-09	3.48207e-06
EIF6	23.2834	2.37235	1.00236	2.36676	0.0179443	0.361904		PMS1	32.0792	-3.77585	1.62271	-2.32688	0.0199717	0.383705
DGKH	11.1266	2.37155	1.16526	2.03522	0.0418291	0.547117		IGLON5	63.9176	-3.76342	1.20852	-3.11408	0.0018452	0.0962663
RPS2	272.797	2.3702	0.622764	3.80593	0.000141272	0.0162222		PRMT7	159.354	-3.75401	0.875924	-4.28578	1.82102e-05	0.00358726
SRSF10	16.5288	2.36675	0.995429	2.37762	0.0174249	0.35679		PPP3CB-AS1	95.29	-3.74874	1.0346	-3.62337	0.00029079	0.0270116
ZNF165	16.5945	2.36529	0.989077	2.39141	0.0167836	0.34961		LOC101929160	31.7265	-3.74815	1.60024	-2.34224	0.0191683	0.373732
TPT1	363.261	2.36255	0.604041	3.91124	9.18228e-05	0.0118784		C19orf44	222.475	-3.74493	0.822041	-4.55564	5.22253e-06	0.00137172
C22orf15	38.7781	2.35827	0.909179	2.59384	0.009491	0.254553		ST7-AS2	31.1814	-3.72281	1.64065	-2.26911	0.0232614	0.416573
SELENOH	11.262	2.33464	1.11345	2.09676	0.036015	0.506761		GRHPR	62.6338	-3.72171	1.20082	-3.0993	0.0019398	0.0989427
RPS26	21.7723	2.33166	0.856253	2.72309	0.00646738	0.195926		MDC1-AS1	93.3569	-3.71867	1.03924	-3.57827	0.000345875	0.0308734
BICRA	13.4454	2.32999	0.994952	2.34181	0.0191906	0.37382		LOC105372579	31.1245	-3.71574	1.61334	-2.30314	0.0212712	0.395867
RPL7	112.06	2.32787	0.860587	2.70498	0.00683084	0.20334		ACSBG1	248.912	-3.71558	0.784631	-4.73544	2.18575e-06	0.000723865
TRIM66	12832.6	2.31347	0.526904	4.39069	1.12989e-05	0.00253129		RAVER2	31.4782	-3.70711	1.88649	-1.96508	0.0494045	0.586159
RNF139	56.1617	2.30147	0.722772	3.18423	0.00145139	0.0822971		GTF2I-AS1	338.733	-3.70298	0.73153	-5.06196	4.14957e-07	0.000220516
PSMB10	15.6728	2.30133	0.993466	2.31646	0.0205331	0.38777		TONSL-AS1	62.0701	-3.70262	1.24473	-2.97463	0.00293343	0.127789
RPS11	217.443	2.30128	0.684028	3.3643	0.000767383	0.0536253		ARHGEF17-AS1	91.3119	-3.69154	1.16309	-3.17392	0.00150397	0.0842331
SMCO4	10.7234	2.29262	1.10675	2.07149	0.0383132	0.522532		HMMR-AS1	30.5456	-3.68551	1.62627	-2.26624	0.0234369	0.418718
RO60	15.9313	2.28746	0.933078	2.45152	0.0142254	0.321211		EZR	30.0242	-3.67744	1.62292	-2.26594	0.0234548	0.418718
RPS16	111.474	2.28575	0.763799	2.99261	0.00276606	0.124669		FKBP15	30.3746	-3.67279	1.60938	-2.28212	0.0224823	0.408356
CCDC85B	30.7157	2.2832	0.77152	2.95935	0.00308284	0.131921		LOC101927393	210.946	-3.67087	0.793424	-4.62661	3.71694e-06	0.0010358
SLC35A3	9.55136	2.28099	1.13051	2.01767	0.043626	0.55359		IL17D	60.1177	-3.66599	1.21048	-3.02855	0.00245731	0.115302
HSP90AA1	106.415	2.27843	0.796306	2.86124	0.00421983	0.155814		MCF2L	29.8666	-3.664	1.61062	-2.2749	0.0229119	0.412576
QRICH1	11.6457	2.27199	1.05939	2.14461	0.0319842	0.485209		SMARCA5-AS1	149.167	-3.65988	1.06315	-3.44248	0.000576403	0.0441366
NDUFB9	27.5996	2.2714	0.89377	2.54137	0.0110418	0.272774		RCN1P2	30.0614	-3.65855	1.61834	-2.26069	0.0237787	0.422197
SLC39A4	23.5057	2.25613	0.824108	2.73766	0.00618787	0.192099		SLC26A1	148.982	-3.65751	0.895136	-4.08599	4.38902e-05	0.00686942
LOC107985694	18.2786	2.24758	0.895343	2.5103	0.0120629	0.290768		LOC107987135	1364.41	-3.64698	0.588021	-6.20213	5.57042e-10	1.41433e-06
KRT7-AS	104.471	2.24633	0.646864	3.47265	0.000515353	0.0414659		LINC00847	88.4465	-3.64127	1.02305	-3.55923	0.000371948	0.0325647
RPLP0	185.804	2.24272	0.746668	3.00363	0.00266777	0.121195		LOC101930071	29.7715	-3.63637	1.62026	-2.24431	0.0248126	0.436103
TGIF1	22.5073	2.24246	0.846068	2.65045	0.00803847	0.225624		C2	58.3977	-3.62942	1.22047	-2.97378	0.00294154	0.127789
KMT2E	98.4427	2.23947	0.630576	3.55146	0.000383094	0.0331611		TOMM34	28.9451	-3.61938	1.61664	-2.23883	0.0251667	0.43866
LRP11	114.682	2.23012	0.671366	3.32177	0.000894494	0.0593042		LOC100129148	376.793	-3.61339	0.678367	-5.3266	1.00069e-07	7.37638e-05
LOC107987209	556.031	2.2301	0.581174	3.83723	0.000124428	0.0148089		ALX3	57.7841	-3.61031	1.20598	-2.99367	0.00275648	0.124483
LOC105369632	39.3276	2.22705	0.893115	2.49358	0.0126464	0.299064		LIMD1-AS1	86.8384	-3.60751	1.05534	-3.41832	0.000630085	0.0477968
PRR34	29.0971	2.22161	0.781838	2.84152	0.00448994	0.160814		LETMD1	28.5047	-3.59919	1.64308	-2.19051	0.0284871	0.468653
PODXL2	15.9422	2.22064	0.976106	2.27499	0.0229063	0.412576		ZNF710	86.2135	-3.58923	1.11528	-3.21824	0.00128978	0.07555
ARMC7	129.226	2.22017	0.611298	3.6319	0.000281346	0.026457		RMI1	255.27	-3.58235	0.750364	-4.77414	1.80475e-06	0.000634467
ARPC3	11.898	2.21531	1.05096	2.10789	0.0350407	0.497957		SNRPD3	28.2061	-3.58008	1.61046	-2.22302	0.0262146	0.447321
RPS6	123.625	2.20685	0.717322	3.07651	0.00209441	0.104124		CENPL	28.0119	-3.56784	1.60871	-2.21783	0.0265665	0.451355
RPS18	242.406	2.20234	0.739592	2.97777	0.00290351	0.12766		SPAG8	27.9508	-3.56055	1.62229	-2.19477	0.0281804	0.465956
STYXL1	60.3377	2.19631	0.775943	2.8305	0.00464759	0.163639		DARS1-AS1	55.625	-3.55785	1.21645	-2.92478	0.00344696	0.137612
TMCO6	1194.64	2.19186	0.553698	3.95857	7.5399e-05	0.0104421		NFYC-AS1	55.849	-3.55509	1.20478	-2.95081	0.0031694	0.134367
SBNO2	11.7892	2.18789	1.08665	2.01343	0.0440691	0.554943		PPP2R3B	27.5598	-3.55344	1.6324	-2.17681	0.0294946	0.475395
TSC22D2	13.9826	2.1859	1.03096	2.12025	0.033985	0.489922		CCDC18	55.0697	-3.54979	1.26068	-2.81578	0.00486591	0.167986
MAPK8IP3	38.1528	2.18448	0.762137	2.86626	0.00415349	0.154328		ALG12	27.3331	-3.54126	1.64677	-2.15043	0.0315211	0.485209
RPL23	129.743	2.1788	0.707274	3.08056	0.00206609	0.103536		DNAH17	55.2661	-3.54097	1.205	-2.93855	0.00329748	0.135429
ABHD11	14.2709	2.15288	1.00241	2.1477	0.0317379	0.485209		DCLRE1C	27.8552	-3.53801	1.63422	-2.16496	0.030391	0.484587
PSMB3	18.9474	2.15213	0.978289	2.19989	0.0278145	0.461911		AFAP1	82.6149	-3.53717	1.02106	-3.46421	0.000531786	0.042638
AGBL5	401.697	2.14444	0.61246	3.50136	0.000462894	0.0380489		LOC107987299	82.7191	-3.53676	1.0508	-3.36577	0.000763307	0.0535041
DYNLT4	54.155	2.13934	0.710185	3.01237	0.00259215	0.119169		LOC101929314	110.69	-3.53569	1.04539	-3.38218	0.00071914	0.0521685
JADE2	17.7675	2.13746	0.901106	2.37204	0.0176899	0.359638		SLC29A4	27.76	-3.52288	1.72214	-2.04564	0.0407916	0.540364
GPR137	241.947	2.13652	0.582548	3.66754	0.000244898	0.023918		SERBP1	27.5266	-3.52178	1.67022	-2.10858	0.034981	0.497418
DNAJC7	26.0144	2.12866	0.962098	2.21252	0.0269308	0.455512		LOC100996506	81.3047	-3.52049	1.25531	-2.80447	0.00503992	0.170919
MIF	67.4332	2.12784	0.698042	3.0483	0.00230139	0.109159		TMED1	244.847	-3.52006	0.732382	-4.80632	1.53735e-06	0.000563813
ZBTB44	12.1974	2.12588	1.02685	2.0703	0.038424	0.523257		PITRM1-AS1	326.604	-3.5184	0.712099	-4.94089	7.77657e-07	0.000335288
EIF4A2	27.1453	2.12518	1.01541	2.09292	0.0363559	0.508737		LOC112268140	53.8775	-3.51626	1.31306	-2.67791	0.00740832	0.21294
PCIF1	12.1687	2.11876	1.03262	2.05183	0.0401861	0.535448		CPSF4L	26.8757	-3.50618	1.62059	-2.16352	0.0305009	0.484587
ALG13	18.8267	2.09966	1.0378	2.02318	0.0430548	0.549851		CTBP1-AS	1158.39	-3.50535	0.578906	-6.05513	1.40301e-09	2.67169e-06
SMARCC2	46.3056	2.08839	0.685548	3.04631	0.00231669	0.109377		PABPC4-AS1	404.443	-3.50434	0.744204	-4.70884	2.49134e-06	0.000782364
RPL37A-DT	70.3621	2.08724	0.732854	2.8481	0.00439809	0.158269		NR2F6	26.4809	-3.50085	1.66659	-2.1006	0.0356757	0.503536
ACAP1	15.8483	2.0677	0.945147	2.1877	0.0286912	0.470591		LOC101927509	53.6434	-3.49945	1.19833	-2.92027	0.00349723	0.138983
WDR38	608.776	2.06596	0.750451	2.75296	0.00590598	0.187993		AKT1	25.9852	-3.46854	1.65326	-2.098	0.0359052	0.505839
UBAC2	26.1554	2.06554	0.79469	2.59918	0.0093446	0.251512		HNRNPAB	52.2303	-3.46848	1.22203	-2.83829	0.00453566	0.16144
MRPL36	356.066	2.05419	0.664111	3.09314	0.00198048	0.100569		SLC9A3	104.703	-3.46798	1.01672	-3.41095	0.000647375	0.0488223
MYL6	37.307	2.05206	0.86187	2.38094	0.0172684	0.355816		ARHGAP45	157.887	-3.46698	0.833721	-4.15844	3.20428e-05	0.00535583
RPS23	75.4925	2.04818	0.705206	2.90437	0.00367994	0.144041		LOC112268155	2356.27	-3.46313	0.584492	-5.92502	3.12254e-09	4.52717e-06
RPLP1	100.172	2.04199	0.714483	2.858	0.00426319	0.155869		SDR39U1	339.676	-3.46116	0.696457	-4.96967	6.70665e-07	0.000300497
SYNGR2	16.0894	2.03802	0.952814	2.13895	0.0324395	0.485209		MARCKS	51.6986	-3.45692	1.30872	-2.64146	0.00825505	0.230606
PLCB3	26.296	2.03693	0.812506	2.50698	0.0121769	0.292899		SMIM15-AS1	103.213	-3.44781	1.02319	-3.36968	0.000752566	0.0532909
CFAP157	314.595	2.02617	0.647607	3.1287	0.00175583	0.0935256		ZSWIM8	25.6114	-3.4453	1.64536	-2.09395	0.0362643	0.508667
SLA2	256.21	2.02441	0.749768	2.70005	0.00693293	0.204358		APC2	103.084	-3.4357	0.929029	-3.69816	0.000217164	0.0229741
DENND4C	22.0048	2.01675	0.869461	2.31954	0.020366	0.385538		PLPPR3	1692.79	-3.43245	0.684758	-5.01265	5.36862e-07	0.000261018
MIR762	134.502	2.01445	0.677042	2.97537	0.00292632	0.127789		PHF10	25.4607	-3.43213	1.71708	-1.99882	0.0456279	0.563522
YIF1B	15478.5	2.00326	0.792454	2.52792	0.0114741	0.280722		ADNP-AS1	50.9577	-3.43153	1.41303	-2.42849	0.0151617	0.33352
TSKU	15.0945	1.98147	0.975857	2.03049	0.0423069	0.547117		FAM168A	25.1875	-3.41826	1.65256	-2.06847	0.038596	0.524942
MARS1	69.6978	1.97996	0.800063	2.47476	0.0133326	0.307754		MZF1	50.6817	-3.41101	1.2012	-2.83966	0.00451612	0.16144
LOC101059906	50.0332	1.97875	0.764881	2.58701	0.00968132	0.257541		ERMAP	50.3263	-3.40808	1.20555	-2.82701	0.00469855	0.164673
XPO5	22.5295	1.97807	0.899001	2.2003	0.0277854	0.461911		CHD4	25.1386	-3.40425	1.62395	-2.09629	0.0360568	0.507036
ODC1	21.4125	1.96807	0.945653	2.08117	0.037418	0.517265		LOC105378662	24.8549	-3.40262	1.68353	-2.02112	0.0432676	0.551734
VDAC1	38.0104	1.96566	0.778945	2.52349	0.0116198	0.282773		VGLL4	25.2657	-3.39912	1.61953	-2.09883	0.0358319	0.505117
SIRT5	20.0547	1.95666	0.87793	2.22872	0.0258324	0.443865		SAXO1	75.0114	-3.39613	1.02559	-3.31138	0.000928368	0.0606118
RPL11	173.801	1.95551	0.791963	2.46919	0.0135418	0.310686		TIPIN	174.445	-3.39219	0.791254	-4.2871	1.81022e-05	0.00358726
RPS15	60.8525	1.95382	0.783624	2.49331	0.0126557	0.299064		LASP1	24.7438	-3.39111	1.63405	-2.07527	0.0379611	0.520812
RPL8	155.272	1.95214	0.788922	2.47444	0.0133444	0.307754		RUFY1-AS1	50.0689	-3.3818	1.25265	-2.69972	0.00693982	0.204358
TOPORS	45.06	1.9477	0.721101	2.70101	0.00691286	0.204358		STARD4-AS1	25.1653	-3.37848	1.66593	-2.02799	0.0425611	0.54881
TBL3	683.327	1.94431	0.593889	3.27386	0.00106089	0.0660556		GNB1	24.635	-3.37711	1.66874	-2.02375	0.0429959	0.549851
FLJ13224	17.7705	1.93336	0.907076	2.13142	0.033055	0.485209		CD37	98.1921	-3.37414	1.02609	-3.28834	0.00100779	0.0639694
RPL41	68.7429	1.93087	0.702933	2.74687	0.00601669	0.1899		TNNI1	147.186	-3.37059	0.857146	-3.93234	8.4123e-05	0.0113076
GYS1	17.8295	1.92832	0.895856	2.15249	0.0313586	0.485209		LOC105375740	24.8245	-3.36893	1.628	-2.06937	0.0385113	0.524134
ANAPC15	15.5545	1.92133	0.973018	1.97461	0.0483126	0.579523		LOC107985403	169.762	-3.34725	0.812279	-4.12082	3.77526e-05	0.00620636
DDTL	545.833	1.91903	0.557054	3.44497	0.000571129	0.0440908		SLC35A5	144.809	-3.34405	0.824735	-4.05469	5.01999e-05	0.00765371
RPL12	113.859	1.89854	0.734719	2.58404	0.00976514	0.259163		KIF23-AS1	216.907	-3.34343	0.812379	-4.1156	3.86177e-05	0.00630323
MIR762HG	247.319	1.89014	0.575249	3.28578	0.00101702	0.0642297		ADAL	24.0112	-3.34144	1.63167	-2.04786	0.0405735	0.538884
CDC25C	62.7823	1.8841	0.670057	2.81185	0.0049257	0.169259		RAD21	23.9329	-3.33711	1.64512	-2.02849	0.0425107	0.54881
STAG2	16.8359	1.87936	0.931563	2.01743	0.0436506	0.55359		FARP1	911.377	-3.33286	0.694207	-4.80096	1.5791e-06	0.000563813
EMC9	25.8014	1.87796	0.853574	2.20011	0.0277991	0.461911		CEMIP	23.7431	-3.33039	1.62664	-2.04741	0.0406177	0.538884
PXN	106.043	1.85742	0.616268	3.01399	0.00257837	0.119169		KBTBD3	47.2514	-3.32068	1.28109	-2.59208	0.00953988	0.255564
CENATAC	1511.38	1.84782	0.557509	3.31442	0.00091834	0.0601289		ANKH	47.3032	-3.31652	1.21945	-2.7197	0.00653417	0.197242
LOC100132356	54.0951	1.84398	0.669055	2.7561	0.00584955	0.187809		CCDC183	47.0718	-3.30982	1.22124	-2.71021	0.00672413	0.20138
RPS17	221.754	1.84051	0.852568	2.15879	0.0308667	0.485209		WDR24	70.7004	-3.30733	1.03287	-3.20207	0.00136443	0.0791334
NT5DC2	22.1778	1.83645	0.846041	2.17064	0.0299583	0.480405		SSPN	187.678	-3.30414	0.845174	-3.90942	9.25198e-05	0.0118784
RPL15	35.6379	1.82487	0.741608	2.4607	0.0138667	0.315292		LOC105369755	70.6269	-3.30352	1.03456	-3.19317	0.00140722	0.0809986
RMND5B	2237.77	1.82321	0.564603	3.22919	0.00124139	0.0736807		PAN3-AS1	46.1556	-3.28918	1.30406	-2.52227	0.0116601	0.282849
GPX4	44.3724	1.8131	0.789916	2.29531	0.0217152	0.400819		APBB3	46.1356	-3.28629	1.23985	-2.65056	0.00803587	0.225624
FAM228B	73.6079	1.80969	0.66072	2.73896	0.00616344	0.192099		TMEM140	438.601	-3.27887	0.76579	-4.28168	1.85486e-05	0.00362268
LOC107985381	28.6746	1.80169	0.790304	2.27974	0.0226229	0.409308		ATG7	161.449	-3.27205	0.814334	-4.01807	5.86768e-05	0.00870664
MASTL	43.5171	1.78692	0.867382	2.06012	0.0393867	0.531762		SRGAP3	22.8379	-3.27045	1.62606	-2.01128	0.044296	0.554943
APEH	24.0957	1.78596	0.86902	2.05514	0.039865	0.533706		LOC105375751	387.421	-3.25982	0.945013	-3.44949	0.000561641	0.0439522
NDUFB2-AS1	836.897	1.78209	0.551528	3.23118	0.00123281	0.0734168		ABALON	2685.85	-3.25679	0.631743	-5.15524	2.5331e-07	0.000142924
EEF1G	144.372	1.77963	0.63412	2.80646	0.00500889	0.170919		BNIP3P11	22.8536	-3.25455	1.65647	-1.96475	0.049443	0.586312
SSB	53.0134	1.77494	0.675725	2.62673	0.00862109	0.237636		CA4	45.6369	-3.2494	1.22615	-2.65009	0.00804708	0.225624
CCER2	447.326	1.77449	0.58015	3.05868	0.00222318	0.107631		CEBPB-AS1	2209.21	-3.24258	0.666887	-4.86227	1.16046e-06	0.000453553
RPL27	38.6874	1.77057	0.894516	1.97936	0.0477754	0.576104		BRD3OS	180.94	-3.24113	0.879529	-3.68507	0.000228639	0.0236149
CARS2	29.9985	1.76753	0.817079	2.16323	0.0305233	0.484587		LOC102724146	225.465	-3.24113	0.719451	-4.505	6.63729e-06	0.00170414
RPS15A	34.9689	1.76752	0.830198	2.12903	0.0332514	0.485281		AMN	246.047	-3.23213	0.738608	-4.37597	1.20893e-05	0.00265628
CUL5	28.8829	1.76331	0.793501	2.22219	0.0262704	0.447321		ARSG	67.1564	-3.22602	1.03991	-3.10221	0.00192081	0.098549
TAPBP	60.6942	1.76139	0.661353	2.66332	0.0077374	0.219636		NFATC3	222.543	-3.22325	0.733258	-4.39579	1.10371e-05	0.00252208
DNAJC24	22.8936	1.75628	0.851266	2.06314	0.0390994	0.529615		KLF3-AS1	66.5439	-3.2232	1.05749	-3.04796	0.00230398	0.109159
RPLP2	69.5939	1.75004	0.727263	2.40634	0.0161131	0.341876		API5	22.1338	-3.21844	1.63529	-1.96812	0.0490545	0.584434
DGUOK-AS1	344.936	1.74905	0.648535	2.69692	0.0069984	0.205542		IMPDH1P10	43.9866	-3.21582	1.28825	-2.49628	0.0125505	0.297193
HCFC1R1	117.639	1.74471	0.696751	2.50407	0.0122773	0.295004		MMS19	22.157	-3.2065	1.63335	-1.96315	0.0496293	0.587149
LOC100996842	78.4388	1.74208	0.850417	2.0485	0.0405107	0.538516		TSSK2	22.1547	-3.2061	1.63517	-1.96071	0.0499131	0.588526
NPRL3	1068.4	1.73046	0.530314	3.26308	0.00110209	0.0677975		HSD17B1	218.511	-3.19481	0.712808	-4.482	7.39458e-06	0.00181267
FTL	80.147	1.72959	0.773539	2.23595	0.0253552	0.441609		LOC102723904	63.9931	-3.16882	1.15631	-2.74045	0.00613551	0.192099
SPOUT1	360.669	1.71367	0.543518	3.15292	0.00161648	0.0879481		TSC22D1-AS1	42.5083	-3.1681	1.27441	-2.48592	0.0129216	0.302003
LOC100129034	1475.73	1.705	0.541349	3.14954	0.00163527	0.0887591		CTBP2	170.862	-3.16063	0.772205	-4.093	4.25831e-05	0.00675741
[truncated: 501 more rows]

## Sheet: Table S8
Supplementary Table S8. DEGs in SW480 Control vs SW480 5-Fluorouracil
[truncated: 1,934 more rows]

## Sheet: Table S9
Supplementary Table S9. DEGs in SW480 Control vs SW480 Cisplatin 30M
[truncated: 761 more rows]

[truncated: 6 more sheets: Table S10, Table S11, Table S12, Table S13, Table S14, Table S15]
