# Supplementary material for: Comprehensive Multi-omics Integration of Bulk, Single cell and Spatial Transcriptomics Reveals Temporal and Spatial Gene Expression to Cisplatin and 5-Fluorouracil in Colorectal Cancer
Source: Research Square preprint supplement (doi:10.21203/rs.3.rs-8003617/v1), 2025-11-04
Supplement: Supplementary file 3 [file 894b22bff47a9edcb232a27d.docx]

**Supplementary Results**

**Quality Assessment and Preprocessing of RNA-Seq Data**

In this study, three publicly available RNA-Seq datasets were selected to investigate the transcriptional response of colorectal cancer cell lines to drug treatment. These datasets provided a combined total of 465,132,353 raw sequencing reads. Prior to downstream analysis, all raw reads underwent a series of quality control steps, including filtering and trimming to remove low-quality bases and adapter sequences. After this preprocessing stage, 395,393,001 high-quality reads were retained and used for further analysis (**Supplementary Table S1**). The first dataset (SRP345690) included 145,516,179 raw reads. After trimming and quality control, 119,849,896 clean reads were preserved (**Supplementary Table S1**). The second dataset (SRP360190) contained 234,291,664 raw reads, of which 202,243,021 passed the quality control thresholds (**Supplementary Table S1**). The third dataset (SRP351625) initially had 85,324,510 reads and 73,300,084 high-quality reads remained after trimming (**Supplementary Table S1**). These cleaned and processed reads were subsequently aligned to the human reference genome (GRCh38) and used for quantifying gene expression levels as well as identifying differentially expressed genes across experimental conditions.

**Number of Differentially Expressed Genes (DEGs) Across Cell Lines and Treatments**

Our research investigated the differential gene expression profiles of three colorectal cancer cell lines such as HCT116, HT29 and SW480 under various treatment conditions compared to their controls. The analysis identified the number of upregulated and downregulated genes (DEGs) following exposure to 5-Fluorouracil (5-FU) and Cisplatin at concentrations of 30 M and 300 M. For the HCT116 cell line, comparisons with the control revealed 276 upregulated and 1285 downregulated genes following 5-FU treatment, 154 upregulated and 652 downregulated genes with Cisplatin at 30 M and 355 upregulated and 905 downregulated genes with Cisplatin at 300 M (**Supplementary Table S2**). In the HT29 cell line, treatment with Cisplatin at 30 M resulted in 508 upregulated and 651 downregulated genes, while the 300 M dose led to 747 upregulated and 1193 downregulated genes (**Supplementary Table S2**). For the SW480 cell line, 5-FU treatment induced 1286 upregulated and 1933 downregulated genes, whereas Cisplatin at 30 M yielded 498 upregulated and 760 downregulated genes, and at 300 M, 877 upregulated and 1332 downregulated genes (**Supplementary Table S2**).

**Relative Expression Levels of Genes in HCT116 Cell Lines**

For HCT116 cells treated with 5FU, the top five upregulated genes were DHRS2, IFI44, SCN1A, KIF1A and SPARC (**Supplementary Figure 1A, Supplementary Table S3**). The top five downregulated genes were BRD3OS, MAL2-AS1, VASH1-AS1, LOC112268088 Sand ITGB1P1 (**Supplementary Figure 1B, Supplementary Table S3**). In response to 30M cisplatin, the top upregulated genes were KRT8P45, LOC107987134, ACE3P, LOC105372385 and GCAWKR (**Supplementary Figure 1C, Supplementary Table S4**), while the top downregulated genes were DST, CENPF, OR51Q1, H1-4 and OR51M1 (**Supplementary Figure 1D, Supplementary Table S4**). For 300M cisplatin, the top upregulated genes were TEX54, KMT2E-AS1, LINC01465, CDC27P10 and LOC100499489 (**Supplementary Figure 1E, Supplementary Table S5**), with the top downregulated genes being LOC112268166, LINC01271, LOC112268006, MTND2P28 and DSP (**Supplementary Figure 1F, Supplementary Table S5**). Full list DEGs were reported in the **Supplementary Table S3-S5**.

**Relative Expression Levels of Genes in HT29 Cell Lines**

In HT29 cells treated with 30M cisplatin, the top five upregulated genes were FBXO44, LOC105375064, PDZD3, PHYHIP and FGF17 (**Supplementary Figure 2A, Supplementary Table S6**). The top five downregulated genes were LOC105369149, LOC100128653, PCED1B, TSC22D1-AS1 and EGFR-AS1 (**Supplementary Figure 2B, Supplementary Table S6**). For 300M cisplatin, the top upregulated genes were RNU2-13P, TRV-AAC1-1, TEX54, MIR23AHG and SEC22B4P (**Supplementary Figure 2C, Supplementary Table S7**), while the top downregulated genes were LOC107985873, ZNF225-AS1, RRBP1, NUMA1 and OBI1-AS1 (**Supplementary Figure 2D, Supplementary Table S7**). Full list DEGs were demonstrated in the **Supplementary Table S6-S7**.

**Relative Expression Levels of Genes in SW480 Cell Lines**

For SW480 cells treated with 5FU, the top five upregulated genes were VCAN, LOC101928543, KITLG, HLTF-AS1 and RTL8A (**Supplementary Figure 3A, Supplementary Table S8**). The top five downregulated genes were RCC2-AS1, LOC105369663, LOC107986257, LOC107986003 and LOC107985428 (**Supplementary Figure 3B, Supplementary Table S8**). In response to 30M cisplatin, the top upregulated genes were SNORD48, RNU2-13P, TRV-AAC2-1, HCG15 and LINC01465 (**Supplementary Figure 3C, Supplementary Table S9**), while the top downregulated genes were LOC105374898, LIMD2, DSP, MAP1B and EVC (**Supplementary Figure 3D, Supplementary Table S9**). For 300M cisplatin, the top upregulated genes were FAT4, DCC, CACNA1E, RPS15P9 and LINC01465 (**Supplementary Figure 3E, Supplementary Table S10**), with the top downregulated genes being HSPA12A-AS1, LOC112268006, WBP2NL, VASH1-AS1 and MTND2P28 (**Supplementary Figure 3F, Supplementary Table S10**). Full list DEGs were indicated in the **Supplementary Table S8-10**.

**Common DEGs in 5FU and Cisplatin**

A comparative transcriptomic analysis was performed to identify common differentially expressed genes (DEGs) in colorectal cancer cell lines treated with 5-fluorouracil and two concentrations of cisplatin (30 M and 300 M). The analysis revealed distinct patterns of gene regulation across different cell lines. In the HCT116 cell line, five genes were consistently downregulated in response to both 5-fluorouracil and cisplatin treatments at 30 M and 300 M. These included EHBP1-AS1, WNT8B, MEF2C-AS2, DNAH10, and GPR68 (**Supplementary Figure 4A**). In the HT29 cell line, co-treatment with cisplatin at both concentrations (30 M and 300 M) led to the upregulation of five genes: TBCB, STK16, MRPL38, SMPD4 and LOC107987209 (**Supplementary Figure 4B**). Conversely, the same treatment resulted in the downregulation of RBP5, PKP4-AS1, NEPRO-AS1, C11orf42 and MACF1 in the HT29 cell line (**Supplementary Figure 4C**). In the SW480 cell line, the genes SUSD2 and OLFML2A were found to be commonly upregulated following exposure to 5-fluorouracil and cisplatin at both concentrations (30 M and 300 M) (**Supplementary Figure 4D**). Meanwhile, five genes such as LOC102724748, EVC, EFNB1, GARS1 and SPINT1-AS1 were consistently downregulated in the SW480 cell line under the same treatment conditions (**Supplementary Figure 4E**).

**Protein-Protein Interaction Between Cell Lines**

To explore the molecular landscape of drug response across three colorectal cancer cell lines (HCT116, HT29, and SW480), we conducted comprehensive protein-protein interaction analyses using STRING and Cytoscape software. Differentially expressed genes (DEGs) were identified under two treatment such as 5-fluorouracil (5-FU) and cisplatin (30 M and 300 M). In the HCT116 cell line, treatment with 5-FU led to the identification of 1,561 significant DEGs, of which 276 were up-regulated and 1,285 down-regulated. These genes formed a PPI network consisting of 50 nodes and 45 edges. Key hub proteins in this group included ISG15 (degree = 7), IFIT2 (degree = 6), IFI44, IFIT1, IFIT3, KRT15 and OASL (degree = 5), KRT12, KRT32, KRT37, KRT38 and SMCHD1 (degree = 4), APOBEC3G and TYMS (degree = 3), ANK, EMILIN2, LPIN2, MYOM1, SPARC, USP14, VIM, WNT7A and YES1 (degree = 5) (**Supplementary Figure 5A**). Upon exposure of HCT116 cells to 30M cisplatin, the number of DEGs decreased to 806 and resulting in a more interconnected network of 61 nodes and 63 edges. The significant hub proteins contained H2BC21 (degree = 12), H2AC20, H2BC4 (degree = 10), ATRX (degree = 9), SETD2(degree = 8), H4C5, USP34 (degree = 7), H2AC13, H2BC18, SMC1A and KRT38 (degree = 6), H1-4 and RAD50 (degree = 5), BPTF (degree = 4), CENPF (degree = 3), KIAA1109, ASPM, OR51B6, OR51M1, OR51Q1, PCM1, PDZD8, SMCHD1, STIL and VPS13A (degree = 2) (**Supplementary Figure 5B**). Increasing the cisplatin concentration to 300M in HCT116 cells altered the interaction profile significantly. A total of 1,260 DEGs were imported into the network, which comprised 41 nodes and 40 edges. Highly connected hub proteins in this condition included MYH9 (degree = 9), CHD4 and HNRNPU (degree = 6), ACTN4, RANBP2, SNRNP200 and TPR (degree = 5), AHNAK (degree = 4), FLNB, HNRNPH1 and PRRC2C (degree =3), CD44, DSP, MYH11, OR51M1, OR51Q1, OR52D1, PALLD, RPL36AL, RRBP1 and SPTBN1 (degree = 2) (**Supplementary Figure 5C**). The HT29 cell line, upon treatment with 30M cisplatin, included 1,940 significant DEGs, forming a PPI network with 67 nodes and 27 edges. The significant hub proteins contained BRCA2, FGFR2 and PDGFRA (degree = 5), FGF17 (degree = 4), FGF19, RET (degree = 3), CDC25A, HERC6, IFI6, RBM39, RPS24, RPS27 and SAMHD1 (degree = 2) (**Supplementary Figure 5D**). In comparison between SW480 Control vs SW480 5-FU group, Protein–protein interaction of 3219 most significantly DEGs were established, which included 49 nodes and 17 edges. The significant hub proteins contained COL12A1, ITGA4, PXDN and VCAN (degree = 3), COL4A5, KITLG, MAGEA3 and TGFBI (degree = 2) (**Supplementary Figure 5E**). When SW480 cells were treated with 30M cisplatin, the number of DEGs dropped to 1,285, resulting in a PPI network of 46 nodes and 16 edges. Hub proteins in this group included MED1 (degree = 4), DST, EPRS1 and STT3A (degree = 3), DSP, IARS1, NIN (degree = 2) (**Supplementary Figure 5F**). At the higher 300M cisplatin dose in SW480 cell line, a total of 2,209 DEGs were detected. This group formed one of the more intricate networks, comprising 61 nodes and 63 edges. Hub proteins included HSPA4 (degree = 9), HSP90AB1 (degree = 8), CTNNA1, YWHAE (degree = 6), TJP1 (degree = 5), CANX, CHD4, CLTC, DMD and NCL (degree = 4), AHNAK, FAT1, HSPH1 and ZFHX4 (degree =3), AHNAK2, CPS1, FAT4, GRIA1, HTR3A, MYO7A, SLC22A1, SLC2A3, SPEN, ZC3H13 and TXNIP (degree = 2) (**Supplementary Figure 5G**).

**Co-Expression in SW480 and HT29 Cell Lines**

In the SW480 cell lines, within the upregulated group, one set of genes (SUSD2 and OLFML2A) showed positive correlation within the group and negative correlation with the other set of genes (LOC102724748, EFNB1 and SPINT1−AS1) in the down-regulated group (**Supplementary Figure 6A**). Some upregulated genes such as: SUSD2 and OLFML2A showed the positive correlation with other downregulated genes including: EVC and GARS1 (**Supplementary Figure 6A**). Other correlations were detected including: LOC102724748 indicated positive correlation with SPINT1−AS1 and EVC revealed positive correlation with GARS1 (**Supplementary Figure 6A**). In the HT29 cell lines, within the upregulated genes, one set of genes such as: TBCB, STK16, MRPL38, SMPD4 and LOC107987209 showed positive correlation within the group and negative correlation with the other set of genes including: RBP5, PKP4−AS1, NEPRO−AS1, C11orf42 and MACF1 in the downregulated group (**Supplementary Figure 6B**).

**Enrichment and KEGG Pathway Evaluation in HCT116 Cell Line**

In the HCT116 control vs HCT116 5FU, GO analysis revealed that the highest rate of down-regulated DEGs were involved in (1) Aminoglycan Biosynthetic Process (GO:0006023), found in the BP category; (2) Clathrin-Coated Endocytic Vesicle Membrane (GO: 0030669), found in the CC category; (3) Carboxypeptidase Activity (GO: 0004180), found in the MF category (**Supplementary Table S11**). The highest rate of upregulated DEGs were involved in (1) Intermediate Filament Organization (GO: 0030669), found in the BP category; (2) Endoplasmic Reticulum Lumen (GO: 0005788), found in the CC category; (3) Cadherin Binding (GO: 0045296), found in the MF category (**Supplementary Table S11**). In the KEGG Pathway evaluation, downregulated DEGs were particularly enriched in Type II diabetes mellitus, whilst the Protein processing in endoplasmic reticulum were identified as the most represented pathways for the upregulated DEGs (**Supplementary Table S11**). In the HCT116 Control vs HCT116 Cisplatin 30M, GO assessment indicated that the highest rate of down-regulated DEGs were involved in (1) Positive Regulation of Cell Migration (GO: 0030335), found in the BP category; (2) Intracellular Membrane-Bounded Organelle (GO: 0043231), found in the CC category; (3) RNA Binding (GO: 0003723), found in the MF category (**Supplementary Table S11**). The highest rate of upregulated DEGs were involved in (1) Unsaturated Fatty Acid Metabolic Process (GO: 0033559), found in the BP category; (2) Cytoplasmic Dynein Complex (GO: 0005868), found in the CC category; (3) Protein Serine/Threonine Kinase Inhibitor Activity (GO: :0030291), found in the MF category (**Supplementary Table S11**). In the KEGG Pathway analysis, downregulated DEGs were particularly enriched in Neutrophil extracellular trap formation, whilst the p53 signaling pathway were identified as the most represented pathways for the upregulated DEGs (**Supplementary Table S11**). In the HCT116 Control vs HCT116 Cisplatin 300M, GO analysis revealed that the highest rate of down-regulated DEGs were involved in (1) mRNA Processing (GO: 0006397), found in the BP category; (2) Intracellular Non-Membrane-Bounded Organelle (GO: 0043232), found in the CC category; (3) RNA Binding (GO: 0003723), found in the MF category (**Supplementary Table S11**). The highest rate of upregulated DEGs were involved in (1) Cytoplasmic Translation (GO: 0002181), found in the BP category; (2) Large Ribosomal Subunit (GO: :0015934), found in the CC category; (3) NAD+ ADP-ribosyltransferase Activity (GO: 0003950), found in the MF category (**Supplementary Table S11**). In the KEGG Pathway evaluation, downregulated DEGs were particularly enriched in Cell cycle, whilst the Ribosome were identified as the most represented pathways for the upregulated DEGs (**Supplementary Table S11**).

**Enrichment and KEGG Pathway Analysis in HT29 Cell Line**

In the HT29 Control vs HT29 Cisplatin 30M, GO analysis revealed that the highest rate of down-regulated DEGs were involved in (1) Cytoplasmic Translation (GO: 0002181), found in the BP category; (2) Cytosolic Large Ribosomal Subunit (GO: 0022625), found in the CC category; (3) Transmembrane Receptor Protein Tyrosine Kinase Activity (GO: 0004714), found in the MF category (**Supplementary Table S11**). The highest rate of upregulated DEGs were involved in (1) Protein Heterooligomerization (GO: 0051291), found in the BP category; (2) Platelet Dense Tubular Network Membrane (GO: 0031095), found in the CC category; (3) Insulin-Like Growth Factor II Binding (GO: :0031995), found in the MF category (**Supplementary Table S11**). In the KEGG Pathway evaluation, downregulated DEGs were particularly enriched in Ribosome, whilst the Fructose and mannose metabolism were identified as the most represented pathways for the upregulated DEGs (**Supplementary Table S11**). In the HT29 Control vs HT29 Cisplatin 300M, GO analysis revealed that the highest rate of down-regulated DEGs were involved in (1) Histone H2A Monoubiquitination (GO: 0035518), found in the BP category; (2) Focal Adhesion (GO: 0005925), found in the CC category; (3) Nuclear Receptor Binding (GO: 0016922), found in the MF category (**Supplementary Table S11**). The highest rate of upregulated DEGs were involved in (1) Cytoplasmic Translation (GO: 0002181), found in the BP category; (2 Cytosolic Large Ribosomal Subunit (GO: 002262), found in the CC category; (3) RNA Binding (GO: 0003723), found in the MF category (**Supplementary Table S11**). In the KEGG Pathway evaluation, downregulated DEGs were particularly enriched in Thyroid hormone signaling pathway, whilst the Ribosome were identified as the most represented pathways for the upregulated DEGs (**Supplementary Table S11**).

**Enrichment and KEGG Pathway Evaluation in SW480 Cell Line**

In the SW480 Control vs SW480 5-FU, GO analysis revealed that the highest rate of down-regulated DEGs were involved in (1) Import into Cell (GO: GO:0098657), found in the BP category; (2) Keratin Filament (GO: 0045095), found in the CC category; (3) Neurotrophin Binding (GO: 0043121), found in the MF category (**Supplementary Table S11**). The highest rate of upregulated DEGs were involved in (1) Regulation of Phospholipase Activity (GO: 0010517), found in the BP category; (2) Collagen-Containing Extracellular Matrix (GO: 0062023), found in the CC category; (3) Neurexin Family Protein Binding (GO: 0042043), found in the MF category (**Supplementary Table S11**). In the KEGG Pathway evaluation, downregulated DEGs were particularly enriched in Alcoholism, whilst the Glutamatergic synapse were identified as the most represented pathways for the upregulated DEGs (**Supplementary Table S11**). In the SW480 Control vs SW480 Cisplatin 30M, GO analysis revealed that the highest rate of down-regulated DEGs were involved in (1) Regulation of Translation (GO: 0006417), found in the BP category; (2) Intracellular Membrane-Bounded Organelle (GO: 0043231), found in the CC category; (3) Cadherin Binding (GO: 0045296), found in the MF category (**Supplementary Table S11**). The highest rate of upregulated DEGs were involved in (1) Cytoplasmic Translation (GO: 0002181), found in the BP category; (2) Large Ribosomal Subunit (GO: 0015934), found in the CC category; (3) Deoxycytidine Deaminase Activity (GO: :0047844), found in the MF category (**Supplementary Table S11**). In the KEGG Pathway evaluation, downregulated DEGs were particularly enriched in Protein processing in endoplasmic reticulum, whilst the Ribosome were identified as the most represented pathways for the upregulated DEGs (**Supplementary Table S11**). In the SW480 Control vs SW480 Cisplatin 300M, GO analysis revealed that the highest rate of down-regulated DEGs were involved in (1) mRNA Splicing, Via Spliceosome (GO: 0000398), found in the BP category; (2 Nucleus (GO: 0005634), found in the CC category; (3) RNA Binding (GO: 0003723), found in the MF category (**Supplementary Table S11**). The highest rate of upregulated DEGs were involved in (1) Calcium Ion Transmembrane Import into Cytosol (GO:0097553), found in the BP category; (2) Collagen-Containing Extracellular Matrix (GO: 0062023), found in the CC category; (3) Voltage-Gated Calcium Channel Activity (GO: 0005245), found in the MF category (**Supplementary Table S11**). In the KEGG Pathway evaluation, downregulated DEGs were particularly enriched in RNA transport, whilst the Protein digestion and absorption were identified as the most represented pathways for the upregulated DEGs (**Supplementary Table S11**).

**Differential Expression of Drug-Responsive Genes in Colorectal Tissues**

To evaluate the clinical relevance of drug-responsive genes identified in colorectal cancer cell lines, expression levels of selected candidate genes were analyzed in colorectal tissue samples using the TNMplot database. Gene expression was compared between normal, tumor, and metastatic colorectal tissues, and findings were categorized based on the originating cell line and treatment condition. In HCT116 cells treated with 5-fluorouracil (5-FU), the genes such as: DHRS2 (P = 6.79e−43), IFI44 (P = 9.28e−25), KIF1A (P = 3.34e−06), SCN1A (P = 6.55e−13), SPARC (P = 4.5e−40) and VASH1 (P = 2.96e−20) were identified to be significantly upregulated in tumor and metastatic tissues compared to normal samples (**Supplementary Figure 7A**). In addition, CENPF (P = 1.45e−39), identified in HCT116 cells treated with 30 M cisplatin, also showed increased expression in tumor tissues (**Supplementary Figure 7A**). Conversely, DST (P = 1.95e−49) and DSP (P = 2.68e−08), derived from HCT116 cells treated with 30 M and 300 M cisplatin, respectively, were significantly downregulated in tumor and metastatic tissues compared to normal tissues (**Supplementary Figure 7A**). From HT29 cells treated with 30 M cisplatin, the gene PHYHIP (P = 2.85e−23) was found to be upregulated in cancerous tissues (**Supplementary Figure 7B**). Further, NUMA1 (P = 5.37e−06), RRBP1 (P = 3.25e−08) and ZNF225 (P = 7.41e−02) identified from HT29 cells treated with 300 M cisplatin, also showed elevated expression in tumor and metastatic tissues (**Supplementary Figure 7B**). In contrast, the genes including EGFR (P = 6.87e−50), FGF17 (P = 1.36e−14), PDZD3 (P = 7.69e−100) and TSC22D1 (P = 1.52e−12), from HT29 cells treated with 30 M cisplatin, were significantly downregulated in tumor samples relative to normal tissues (**Supplementary Figure 7B**). In SW480 cells, several upregulated genes were detected in RNASeq samples. Specifically, HLTF (P = 5.77e−13) and VCAN (P = 6.92e−89) from 5-FU-treated SW480 cells showed significant overexpression in tumor and metastatic tissues (**Supplementary Figure 7C**). Additionally, LIMD2 (P = 1.82e−03) and MAP1B (P = 7.14e−18) from SW480 cells treated with 30 M cisplatin, as well as CACNA1E (P = 6.88e−27), DCC (P = 3.65e−20), FAT4 (P = 3.76e−12), RPS15 (P = 2.07e−13) and VASH1 (P = 2.96e−20) from cells treated with 300 M cisplatin, were significantly upregulated in tumor tissues compared to normal tissues (**Supplementary Figure 7C**). In contrast, HSPA12A (P = 1.03e−12), from SW480 cells treated with 300 M cisplatin and KITLG (P = 6.49e−02), from 5-FU-treated SW480 cells, were downregulated in tumor and metastatic tissues compared to control tissues (**Supplementary Figure 7C**).

**Expression Profiling of PPI-Derived Hub Genes in Colorectal Tissues**

The expression levels of hub genes identified through protein–protein interaction (PPI), were examined in colorectal tissue samples using the TNMplot database. These genes, originally identified based on their differential expression in drug-treated colorectal cancer cell lines and analyzed in normal, tumor and metastatic tissues. In HCT116 cells treated with 5-FU, the hub gene IFIT2 (P = 1.08e−15) was found to be significantly upregulated in tumor and metastatic tissues compared to normal samples (**Supplementary Figure 8A**). In HCT116 cells treated with 300 M cisplatin, the hub gene MYH9 (P = 3.64e−06) showed a marked downregulation in tumor tissues relative to normal tissues (**Supplementary Figure 8A**). In HT29 cells treated with 30 M cisplatin, the hub gene BRCA2 (P = 2.56e−66) was significantly upregulated in tumor and metastatic tissues (**Supplementary Figure 8B**). In contrast, some genes such as FGFR2 (P = 4.48e−117) and PDGFRA (P = 7.15e−20) were strongly downregulated in tumor samples (**Supplementary Figure 8B**). In SW480 cells treated with 30 M cisplatin, the hub gene MED1 (P = 6.19e−72) exhibited increased expression in tumor and metastatic tissues compared to normal tissues (**Supplementary Figure 8C**). Furthermore, in SW480 cells treated with 300 M cisplatin, HSPA4 (P = 5e−25) was found to be significantly upregulated in tumor samples (**Supplementary Figure 8C**). In addition, the expression levels of these hub genes were evaluated across different clinical stages such as I, II, III and IV of colorectal cancer (**Supplementary Figure 8A-8C**). Many of these genes indicated stage-associated expression changes and suggesting their potential role in cancer progression and their utility as prognostic biomarkers or therapeutic targets.

**Exploring Cellular Diversity Through Single-Cell Transcriptome Analysis**

We conducted a scRNA-seq evaluation of 46,467 genes and 33,654 cells from 10 human colorectal cancer tissue samples including 5 normal tissues (23,105 genes and 15,941 cells) and 5 tumor tissues (23,362 genes and 17,713 cells). The total number of cells and genes for 10 samples before and after quality controls are provided in **Supplementary Table S12**. Following the standardization and quality assessment of scRNA-seq data, cells of lower quality were eliminated (**Supplementary Figure 9A**). Finally, the top 2000 genes with significant variance variations were chosen for further examination (**Supplementary Figure 9B**). Next, we performed a dimension reduction assessment between samples by using the "RunPCA" function to lower the PCA dimensional of the top 2000 highly variable genes (**Supplementary Figure 9C**). A large number of "important" PCs with low p-values were found. The top 20 principal components were displayed using the JackStrawPlot method and then each PC's variance was calculated and evaluated with the median dispersion. In general, the "important" PCs had a low p-value and fully aligned with the data of highly distinct genes. In contrast, the "ElbowPlot" function showed that, although while the flexible point appeared roughly the 10 PC, the variance progressively diminished after the 20 PC (**Supplementary Figure 9D**). In this step, we created a heatmap of the original PCs and highlighting their most significant genes with the goal to reveal how their DEGs differentiated from that of other PCs (**Supplementary Figure 9E-9F**). Finally, we identified the top 20 PCs for further UMAP evaluation.

**Pseudotime Trajectory Evaluation of Hub Genes**

In the hub genes group, FGFR2 exhibited high expression in Epithelial cells and PDGFRA showed high expression in Fibroblasts along the pseudotime trajectory (**Supplementary Figure 10A**). Moderate expression was observed for IFIT2, MYH9, HSPA4 and MED1 in Epithelial cells, as well as COL12A1 in fibroblasts (**Supplementary Figure 10A**). In contrast, ISG15 and BRCA2 displayed very low expression in Epithelial cells (**Supplementary Figure 10A**). In the HT29-common group, MRPL38 and SMPD4 exhibited high expression in Epithelial cells, while TBCB and STK16 showed moderate expression in the same cell type during pseudotime progression (**Supplementary Figure 10B**). In the SW480-common group, both SUSD2 and OLFML2A demonstrated moderate expression in Epithelial cells and Fibroblasts, respectively, throughout the pseudotime trajectory (**Supplementary Figure 10C**). In conclusion, the pseudotime trajectory evaluation indicated dynamic and cell-type-specific expression patterns of treatment-responsive genes across colorectal tumor tissues. A significant proportion of genes exhibited moderate to high expression in Epithelial cells and highlighting their central role in drug response. Notably, Fibroblasts also demonstrated high expression of several key genes and particularly in response to cisplatin treatment and suggesting an active involvement of stromal components in therapy-induced molecular alterations. Immune cells, including B cells and T cells, contributed to the transcriptional landscape in selected treatments. These findings revealed that the heterogeneous cellular response to chemotherapy and emphasize the critical role of single-cell trajectory assessment in discovering gene expression during pseudotime across the colorectal tumor microenvironment.
